# Supplementary material for: Proteomic analysis of human prostate cancer PC-3M-1E8 cells and PC-3M-2B4 cells of same origin but with different metastatic potential
Source: PLoS One. 2018 Oct 31;13(10):e0206139. doi: 10.1371/journal.pone.0206139 (PMC6209233; doi:10.1371/journal.pone.0206139)
Supplement: S6 Table — (XLSX) [file pone.0206139.s009.xlsx]

## Sheet: TopBlastHit
Proteomic Analysis of Human Prostate Cancer PC-3M-1E8 cells and PC-3M-2B4 cells of Same Origin but with Different Metastatic Potential
Shujiang Zhang, Chengcheng Zheng, Shunheng Yao, Zhonghui Wang, Li Xu, Rongfu Yang, Xiang Meng, Jianhui Wu, Li Zhou, Zuyue Sun
Sequence name	Sequence desc.	Sequence length	Hit desc.	Hit ACC	E-Value	Similarity	Bit-Score	Alignment length	Positives
Q2TU64	TCPG_HUMANT-complex protein 1 subunit gamma OS=Homo sapiens GN=CCT3 PE=1 SV=4	545	sp|P49368|TCPG_HUMANT-complex protein 1 subunit gamma OS=Homo sapiens GN=CCT3 PE=1 SV=4	P49368	0	99	1112.44	545	543
C9J406	MIC60_HUMANMICOS complex subunit MIC60 OS=Homo sapiens GN=IMMT PE=1 SV=1	659	sp|Q16891|MIC60_HUMANMICOS complex subunit MIC60 OS=Homo sapiens GN=IMMT PE=1 SV=1	Q16891	0	98	1273.46	671	658
P05787	type II cytoskeletal 8 OS=Homo sapiens GN=KRT8 PE=1 SV=7	483	sp|P05787|K2C8_HUMANKeratin, type II cytoskeletal 8 OS=Homo sapiens GN=KRT8 PE=1 SV=7	P05787	0	100	971.844	483	483
P55795	HNRH2_HUMANHeterogeneous nuclear ribonucleoprotein H2 OS=Homo sapiens GN=HNRNPH2 PE=1 SV=1	449	sp|P55795|HNRH2_HUMANHeterogeneous nuclear ribonucleoprotein H2 OS=Homo sapiens GN=HNRNPH2 PE=1 SV=1	P55795	0	100	926.006	449	449
P07205	PGK2_HUMANPhosphoglycerate kinase 2 OS=Homo sapiens GN=PGK2 PE=1 SV=3	417	sp|P07205|PGK2_HUMANPhosphoglycerate kinase 2 OS=Homo sapiens GN=PGK2 PE=1 SV=3	P07205	0	100	850.121	417	417
B2RA03	type I cytoskeletal 18 OS=Homo sapiens GN=KRT18 PE=1 SV=2	430	sp|P05783|K1C18_HUMANKeratin, type I cytoskeletal 18 OS=Homo sapiens GN=KRT18 PE=1 SV=2	P05783	0	100	868.996	430	430
B4DH89	AL1A2_HUMANRetinal dehydrogenase 2 OS=Homo sapiens GN=ALDH1A2 PE=1 SV=3	489	sp|O94788|AL1A2_HUMANRetinal dehydrogenase 2 OS=Homo sapiens GN=ALDH1A2 PE=1 SV=3	O94788	0	99	991.104	483	480
P08727	type I cytoskeletal 19 OS=Homo sapiens GN=KRT19 PE=1 SV=4	400	sp|P08727|K1C19_HUMANKeratin, type I cytoskeletal 19 OS=Homo sapiens GN=KRT19 PE=1 SV=4	P08727	0	100	807.749	400	400
O15247	CLIC2_HUMANChloride intracellular channel protein 2 OS=Homo sapiens GN=CLIC2 PE=1 SV=3	247	sp|O15247|CLIC2_HUMANChloride intracellular channel protein 2 OS=Homo sapiens GN=CLIC2 PE=1 SV=3	O15247	0	100	509.22	247	247
A0A024RDE8	PDLI5_HUMANPDZ and LIM domain protein 5 OS=Homo sapiens GN=PDLIM5 PE=1 SV=5	596	sp|Q96HC4|PDLI5_HUMANPDZ and LIM domain protein 5 OS=Homo sapiens GN=PDLIM5 PE=1 SV=5	Q96HC4	0	99	1236.86	596	595
Q06787	FMR1_HUMANFragile X mental retardation protein 1 OS=Homo sapiens GN=FMR1 PE=1 SV=1	632	sp|Q06787|FMR1_HUMANFragile X mental retardation protein 1 OS=Homo sapiens GN=FMR1 PE=1 SV=1	Q06787	0	100	1311.21	632	632
E9PJK1	CD81_HUMANCD81 antigen OS=Homo sapiens GN=CD81 PE=1 SV=1	165	sp|P60033|CD81_HUMANCD81 antigen OS=Homo sapiens GN=CD81 PE=1 SV=1	P60033	9.15756e-117	100	333.954	165	165
Q96KR6	F210B_HUMANProtein FAM210B OS=Homo sapiens GN=FAM210B PE=1 SV=2	192	sp|Q96KR6|F210B_HUMANProtein FAM210B OS=Homo sapiens GN=FAM210B PE=1 SV=2	Q96KR6	1.47924e-136	100	383.645	192	192
B3KUB6	E41L1_HUMANBand -like protein 1 OS=Homo sapiens GN=EPB41L1 PE=1 SV=2	772	sp|Q9H4G0|E41L1_HUMANBand 4.1-like protein 1 OS=Homo sapiens GN=EPB41L1 PE=1 SV=2	Q9H4G0	0	94	1431.77	819	771
P37059	DHB2_HUMANEstradiol 17-beta-dehydrogenase 2 OS=Homo sapiens GN=HSD17B2 PE=1 SV=1	387	sp|P37059|DHB2_HUMANEstradiol 17-beta-dehydrogenase 2 OS=Homo sapiens GN=HSD17B2 PE=1 SV=1	P37059	0	100	800.045	387	387
Q99536	VAT1_HUMANSynaptic vesicle membrane protein VAT-1 homolog OS=Homo sapiens GN=VAT1 PE=1 SV=2	393	sp|Q99536|VAT1_HUMANSynaptic vesicle membrane protein VAT-1 homolog OS=Homo sapiens GN=VAT1 PE=1 SV=2	Q99536	0	100	806.979	393	393
B4DU58	CAPG_HUMANMacrophage-capping protein OS=Homo sapiens GN=CAPG PE=1 SV=2	327	sp|P40121|CAPG_HUMANMacrophage-capping protein OS=Homo sapiens GN=CAPG PE=1 SV=2	P40121	0	93	647.506	348	327
C9J2P0	UB2E1_HUMANUbiquitin-conjugating enzyme E2 E1 OS=Homo sapiens GN=UBE2E1 PE=1 SV=1	147	sp|P51965|UB2E1_HUMANUbiquitin-conjugating enzyme E2 E1 OS=Homo sapiens GN=UBE2E1 PE=1 SV=1	P51965	4.43368e-105	100	301.982	147	147
Q59H46	ITB4_HUMANIntegrin beta-4 OS=Homo sapiens GN=ITGB4 PE=1 SV=5	1515	sp|P16144|ITB4_HUMANIntegrin beta-4 OS=Homo sapiens GN=ITGB4 PE=1 SV=5	P16144	0	93	2867.03	1553	1451
D3DSV0	RBPMS_HUMANRNA-binding protein with multiple splicing OS=Homo sapiens GN=RBPMS PE=1 SV=1	179	sp|Q93062|RBPMS_HUMANRNA-binding protein with multiple splicing OS=Homo sapiens GN=RBPMS PE=1 SV=1	Q93062	8.06291e-124	100	351.288	176	176
Q9H8M2	BRD9_HUMANBromodomain-containing protein 9 OS=Homo sapiens GN=BRD9 PE=1 SV=2	597	sp|Q9H8M2|BRD9_HUMANBromodomain-containing protein 9 OS=Homo sapiens GN=BRD9 PE=1 SV=2	Q9H8M2	0	100	1226.08	597	597
B4DPP0	CD9_HUMANCD9 antigen OS=Homo sapiens GN=CD9 PE=1 SV=4	141	sp|P21926|CD9_HUMANCD9 antigen OS=Homo sapiens GN=CD9 PE=1 SV=4	P21926	5.65152e-100	100	290.041	141	141
A0A024RC14	MAGAA_HUMANMelanoma-associated antigen 10 OS=Homo sapiens GN=MAGEA10 PE=2 SV=2	369	sp|P43363|MAGAA_HUMANMelanoma-associated antigen 10 OS=Homo sapiens GN=MAGEA10 PE=2 SV=2	P43363	0	100	746.888	369	369
B2R8A2	TMED9_HUMANTransmembrane emp24 domain-containing protein 9 OS=Homo sapiens GN=TMED9 PE=1 SV=2	214	sp|Q9BVK6|TMED9_HUMANTransmembrane emp24 domain-containing protein 9 OS=Homo sapiens GN=TMED9 PE=1 SV=2	Q9BVK6	5.6142e-159	100	443.351	214	214
Q9NUU6	F105A_HUMANInactive ubiquitin thioesterase FAM105A OS=Homo sapiens GN=FAM105A PE=2 SV=1	356	sp|Q9NUU6|F105A_HUMANInactive ubiquitin thioesterase FAM105A OS=Homo sapiens GN=FAM105A PE=2 SV=1	Q9NUU6	0	100	744.962	356	356
Q8IVQ8	XPO4_HUMANExportin-4 OS=Homo sapiens GN=XPO4 PE=1 SV=2	1008	sp|Q9C0E2|XPO4_HUMANExportin-4 OS=Homo sapiens GN=XPO4 PE=1 SV=2	Q9C0E2	0	100	2084.3	1008	1008
P16422	EPCAM_HUMANEpithelial cell adhesion molecule OS=Homo sapiens GN=EPCAM PE=1 SV=2	314	sp|P16422|EPCAM_HUMANEpithelial cell adhesion molecule OS=Homo sapiens GN=EPCAM PE=1 SV=2	P16422	0	100	652.514	314	314
B4DVJ1	DGLB_HUMANSn1-specific diacylglycerol lipase beta OS=Homo sapiens GN=DAGLB PE=1 SV=2	220	sp|Q8NCG7|DGLB_HUMANSn1-specific diacylglycerol lipase beta OS=Homo sapiens GN=DAGLB PE=1 SV=2	Q8NCG7	9.03279e-113	98	340.887	169	166
B7Z4U6	GELS_HUMANGelsolin OS=Homo sapiens GN=GSN PE=1 SV=1	689	sp|P06396|GELS_HUMANGelsolin OS=Homo sapiens GN=GSN PE=1 SV=1	P06396	0	99	1394.79	675	674
A0A0D9SG53	FHL1_HUMANFour and a half LIM domains protein 1 OS=Homo sapiens GN=FHL1 PE=1 SV=4	130	sp|Q13642|FHL1_HUMANFour and a half LIM domains protein 1 OS=Homo sapiens GN=FHL1 PE=1 SV=4	Q13642	3.02838e-91	100	270.781	130	130
P15144	AMPN_HUMANAminopeptidase N OS=Homo sapiens GN=ANPEP PE=1 SV=4	967	sp|P15144|AMPN_HUMANAminopeptidase N OS=Homo sapiens GN=ANPEP PE=1 SV=4	P15144	0	100	2009.19	967	967
A4UJ43	GSTM3_HUMANGlutathione S-transferase Mu 3 OS=Homo sapiens GN=GSTM3 PE=1 SV=3	210	sp|P21266|GSTM3_HUMANGlutathione S-transferase Mu 3 OS=Homo sapiens GN=GSTM3 PE=1 SV=3	P21266	9.0671e-139	98	391.349	192	190
Q9UJC3	HOOK1_HUMANProtein Hook homolog 1 OS=Homo sapiens GN=HOOK1 PE=1 SV=2	728	sp|Q9UJC3|HOOK1_HUMANProtein Hook homolog 1 OS=Homo sapiens GN=HOOK1 PE=1 SV=2	Q9UJC3	0	100	1481.46	728	728
Q96B43	MAP2_HUMANMethionine aminopeptidase 2 OS=Homo sapiens GN=METAP2 PE=1 SV=1	253	sp|P50579|MAP2_HUMANMethionine aminopeptidase 2 OS=Homo sapiens GN=METAP2 PE=1 SV=1	P50579	0	100	532.717	253	253
P26447	S10A4_HUMANProtein S100-A4 OS=Homo sapiens GN=S100A4 PE=1 SV=1	101	sp|P26447|S10A4_HUMANProtein S100-A4 OS=Homo sapiens GN=S100A4 PE=1 SV=1	P26447	3.02817e-70	100	207.994	101	101
C9JSQ1	KCRU_HUMANCreatine kinase U- mitochondrial OS=Homo sapiens GN=CKMT1A PE=1 SV=1	241	sp|P12532|KCRU_HUMANCreatine kinase U-type, mitochondrial OS=Homo sapiens GN=CKMT1A PE=1 SV=1	P12532	1.68019e-176	100	496.123	241	241
G3V2R9	PTGR2_HUMANProstaglandin reductase 2 OS=Homo sapiens GN=PTGR2 PE=1 SV=1	217	sp|Q8N8N7|PTGR2_HUMANProstaglandin reductase 2 OS=Homo sapiens GN=PTGR2 PE=1 SV=1	Q8N8N7	2.01044e-158	100	446.432	217	217
B8ZZZ1	AP1S3_HUMANAP-1 complex subunit sigma-3 OS=Homo sapiens GN=AP1S3 PE=1 SV=1	137	sp|Q96PC3|AP1S3_HUMANAP-1 complex subunit sigma-3 OS=Homo sapiens GN=AP1S3 PE=1 SV=1	Q96PC3	4.25718e-67	89	203.756	117	105
B4E200	PPIC_HUMANPeptidyl-prolyl cis-trans isomerase C OS=Homo sapiens GN=PPIC PE=1 SV=1	132	sp|P45877|PPIC_HUMANPeptidyl-prolyl cis-trans isomerase C OS=Homo sapiens GN=PPIC PE=1 SV=1	P45877	5.0017e-47	100	154.066	77	77
Q05DN2	IFIT2_HUMANInterferon-induced protein with tetratricopeptide repeats 2 OS=Homo sapiens GN=IFIT2 PE=1 SV=1	412	sp|P09913|IFIT2_HUMANInterferon-induced protein with tetratricopeptide repeats 2 OS=Homo sapiens GN=IFIT2 PE=1 SV=1	P09913	0	99	845.884	412	410
A0A024RC76	ISG20_HUMANInterferon-stimulated gene 20 kDa protein OS=Homo sapiens GN=ISG20 PE=1 SV=2	118	sp|Q96AZ6|ISG20_HUMANInterferon-stimulated gene 20 kDa protein OS=Homo sapiens GN=ISG20 PE=1 SV=2	Q96AZ6	5.95493e-81	100	238.81	118	118
A0A087X0Q6	SP8_HUMANTranscription factor Sp8 OS=Homo sapiens GN=SP8 PE=2 SV=3	466	sp|Q8IXZ3|SP8_HUMANTranscription factor Sp8 OS=Homo sapiens GN=SP8 PE=2 SV=3	Q8IXZ3	0	90	734.176	490	444
P05204	HMGN2_HUMANNon-histone chromosomal protein HMG-17 OS=Homo sapiens GN=HMGN2 PE=1 SV=3	90	sp|P05204|HMGN2_HUMANNon-histone chromosomal protein HMG-17 OS=Homo sapiens GN=HMGN2 PE=1 SV=3	P05204	5.48648e-52	100	160.999	90	90
Q7Z443	PK1L3_HUMANPolycystic kidney disease protein 1-like 3 OS=Homo sapiens GN=PKD1L3 PE=1 SV=1	1732	sp|Q7Z443|PK1L3_HUMANPolycystic kidney disease protein 1-like 3 OS=Homo sapiens GN=PKD1L3 PE=1 SV=1	Q7Z443	0	100	3586.96	1732	1732
A0A087WXU6	TF2LY_HUMANHomeobox protein TGIF2LY OS=Homo sapiens GN=TGIF2LY PE=2 SV=1	185	sp|Q8IUE0|TF2LY_HUMANHomeobox protein TGIF2LY OS=Homo sapiens GN=TGIF2LY PE=2 SV=1	Q8IUE0	6.93695e-137	100	384.03	185	185
P43355	MAGA1_HUMANMelanoma-associated antigen 1 OS=Homo sapiens GN=MAGEA1 PE=1 SV=1	309	sp|P43355|MAGA1_HUMANMelanoma-associated antigen 1 OS=Homo sapiens GN=MAGEA1 PE=1 SV=1	P43355	0	100	629.787	309	309
Q9HBR0	S38AA_HUMAN sodium-coupled neutral amino acid transporter 10 OS=Homo sapiens GN=SLC38A10 PE=1 SV=2	1119	sp|Q9HBR0|S38AA_HUMANPutative sodium-coupled neutral amino acid transporter 10 OS=Homo sapiens GN=SLC38A10 PE=1 SV=2	Q9HBR0	0	100	2247.63	1119	1119
Q9NWM3	CUED1_HUMANCUE domain-containing protein 1 OS=Homo sapiens GN=CUEDC1 PE=1 SV=1	386	sp|Q9NWM3|CUED1_HUMANCUE domain-containing protein 1 OS=Homo sapiens GN=CUEDC1 PE=1 SV=1	Q9NWM3	0	100	787.334	386	386
H0Y6D8	TBP_HUMANTATA-box-binding protein OS=Homo sapiens GN=TBP PE=1 SV=2	101	sp|P20226|TBP_HUMANTATA-box-binding protein OS=Homo sapiens GN=TBP PE=1 SV=2	P20226	1.20625e-62	88	196.438	113	100
P25815	S100P_HUMANProtein S100-P OS=Homo sapiens GN=S100P PE=1 SV=2	95	sp|P25815|S100P_HUMANProtein S100-P OS=Homo sapiens GN=S100P PE=1 SV=2	P25815	3.4582e-64	100	192.2	95	95
H0YGX7	GDIR2_HUMANRho GDP-dissociation inhibitor 2 OS=Homo sapiens GN=ARHGDIB PE=1 SV=3	195	sp|P52566|GDIR2_HUMANRho GDP-dissociation inhibitor 2 OS=Homo sapiens GN=ARHGDIB PE=1 SV=3	P52566	1.10922e-131	99	372.089	195	194
D6RA82	ANXA3_HUMANAnnexin A3 OS=Homo sapiens GN=ANXA3 PE=1 SV=3	284	sp|P12429|ANXA3_HUMANAnnexin A3 OS=Homo sapiens GN=ANXA3 PE=1 SV=3	P12429	0	100	579.711	284	284
B7ZL93	GP107_HUMANProtein GPR107 OS=Homo sapiens GN=GPR107 PE=1 SV=1	379	sp|Q5VW38|GP107_HUMANProtein GPR107 OS=Homo sapiens GN=GPR107 PE=1 SV=1	Q5VW38	0	100	780.4	379	379
Q96DZ4	MMP1_HUMANInterstitial collagenase OS=Homo sapiens GN=MMP1 PE=1 SV=3	232	sp|P03956|MMP1_HUMANInterstitial collagenase OS=Homo sapiens GN=MMP1 PE=1 SV=3	P03956	5.87828e-173	100	488.419	232	232
Q9H617	TM164_HUMANTransmembrane protein 164 OS=Homo sapiens GN=TMEM164 PE=2 SV=1	258	sp|Q5U3C3|TM164_HUMANTransmembrane protein 164 OS=Homo sapiens GN=TMEM164 PE=2 SV=1	Q5U3C3	0	86	510.76	297	258
B4DLV6	SNIP1_HUMANSmad nuclear-interacting protein 1 OS=Homo sapiens GN=SNIP1 PE=1 SV=1	290	sp|Q8TAD8|SNIP1_HUMANSmad nuclear-interacting protein 1 OS=Homo sapiens GN=SNIP1 PE=1 SV=1	Q8TAD8	1.45035e-131	99	382.874	197	196
Q8NFR3	SPTSB_HUMANSerine palmitoyltransferase small subunit B OS=Homo sapiens GN=SPTSSB PE=1 SV=1	76	sp|Q8NFR3|SPTSB_HUMANSerine palmitoyltransferase small subunit B OS=Homo sapiens GN=SPTSSB PE=1 SV=1	Q8NFR3	1.698e-51	100	158.688	76	76

## Sheet: protein2GO
SeqName	Hit-Desc	GO-Group	GO-ID	Term
Q2TU64	TCPG_HUMANT-complex protein 1 subunit gamma OS=Homo sapiens GN=CCT3 PE=1 SV=4	C	GO:0005832	chaperonin-containing T-complex
Q2TU64	TCPG_HUMANT-complex protein 1 subunit gamma OS=Homo sapiens GN=CCT3 PE=1 SV=4	C	GO:0005874	microtubule
Q2TU64	TCPG_HUMANT-complex protein 1 subunit gamma OS=Homo sapiens GN=CCT3 PE=1 SV=4	C	GO:0005886	plasma membrane
Q2TU64	TCPG_HUMANT-complex protein 1 subunit gamma OS=Homo sapiens GN=CCT3 PE=1 SV=4	C	GO:0043231	intracellular membrane-bounded organelle
Q2TU64	TCPG_HUMANT-complex protein 1 subunit gamma OS=Homo sapiens GN=CCT3 PE=1 SV=4	C	GO:0070062	extracellular vesicular exosome
Q2TU64	TCPG_HUMANT-complex protein 1 subunit gamma OS=Homo sapiens GN=CCT3 PE=1 SV=4	F	GO:0005524	ATP binding
Q2TU64	TCPG_HUMANT-complex protein 1 subunit gamma OS=Homo sapiens GN=CCT3 PE=1 SV=4	N	GO:0044822
Q2TU64	TCPG_HUMANT-complex protein 1 subunit gamma OS=Homo sapiens GN=CCT3 PE=1 SV=4	F	GO:0051082	unfolded protein binding
Q2TU64	TCPG_HUMANT-complex protein 1 subunit gamma OS=Homo sapiens GN=CCT3 PE=1 SV=4	P	GO:0006810	transport
Q2TU64	TCPG_HUMANT-complex protein 1 subunit gamma OS=Homo sapiens GN=CCT3 PE=1 SV=4	P	GO:0044267	cellular protein metabolic process
Q2TU64	TCPG_HUMANT-complex protein 1 subunit gamma OS=Homo sapiens GN=CCT3 PE=1 SV=4	P	GO:0051084	'de novo' posttranslational protein folding
C9J406	MIC60_HUMANMICOS complex subunit MIC60 OS=Homo sapiens GN=IMMT PE=1 SV=1	N	GO:0061617
C9J406	MIC60_HUMANMICOS complex subunit MIC60 OS=Homo sapiens GN=IMMT PE=1 SV=1	F	GO:0005515	protein binding
C9J406	MIC60_HUMANMICOS complex subunit MIC60 OS=Homo sapiens GN=IMMT PE=1 SV=1	N	GO:0044822
C9J406	MIC60_HUMANMICOS complex subunit MIC60 OS=Homo sapiens GN=IMMT PE=1 SV=1	P	GO:0042407	cristae formation
P05787	type II cytoskeletal 8 OS=Homo sapiens GN=KRT8 PE=1 SV=7	C	GO:0005634	nucleus
P05787	type II cytoskeletal 8 OS=Homo sapiens GN=KRT8 PE=1 SV=7	C	GO:0016020	membrane
P05787	type II cytoskeletal 8 OS=Homo sapiens GN=KRT8 PE=1 SV=7	C	GO:0044444	cytoplasmic part
P05787	type II cytoskeletal 8 OS=Homo sapiens GN=KRT8 PE=1 SV=7	C	GO:0045095	keratin filament
P05787	type II cytoskeletal 8 OS=Homo sapiens GN=KRT8 PE=1 SV=7	C	GO:0070062	extracellular vesicular exosome
P05787	type II cytoskeletal 8 OS=Homo sapiens GN=KRT8 PE=1 SV=7	C	GO:0071944	cell periphery
P05787	type II cytoskeletal 8 OS=Homo sapiens GN=KRT8 PE=1 SV=7	F	GO:0005198	structural molecule activity
P05787	type II cytoskeletal 8 OS=Homo sapiens GN=KRT8 PE=1 SV=7	F	GO:0097110	scaffold protein binding
P05787	type II cytoskeletal 8 OS=Homo sapiens GN=KRT8 PE=1 SV=7	P	GO:0006950	response to stress
P05787	type II cytoskeletal 8 OS=Homo sapiens GN=KRT8 PE=1 SV=7	P	GO:0007010	cytoskeleton organization
P05787	type II cytoskeletal 8 OS=Homo sapiens GN=KRT8 PE=1 SV=7	P	GO:0007275	multicellular organismal development
P05787	type II cytoskeletal 8 OS=Homo sapiens GN=KRT8 PE=1 SV=7	P	GO:0022607	cellular component assembly
P05787	type II cytoskeletal 8 OS=Homo sapiens GN=KRT8 PE=1 SV=7	P	GO:0030154	cell differentiation
P05787	type II cytoskeletal 8 OS=Homo sapiens GN=KRT8 PE=1 SV=7	P	GO:0050794	regulation of cellular process
P05787	type II cytoskeletal 8 OS=Homo sapiens GN=KRT8 PE=1 SV=7	P	GO:0051716	cellular response to stimulus
P05787	type II cytoskeletal 8 OS=Homo sapiens GN=KRT8 PE=1 SV=7	P	GO:0060429	epithelium development
P05787	type II cytoskeletal 8 OS=Homo sapiens GN=KRT8 PE=1 SV=7	N	GO:1902589
P55795	HNRH2_HUMANHeterogeneous nuclear ribonucleoprotein H2 OS=Homo sapiens GN=HNRNPH2 PE=1 SV=1	C	GO:0005654	nucleoplasm
P55795	HNRH2_HUMANHeterogeneous nuclear ribonucleoprotein H2 OS=Homo sapiens GN=HNRNPH2 PE=1 SV=1	C	GO:0016020	membrane
P55795	HNRH2_HUMANHeterogeneous nuclear ribonucleoprotein H2 OS=Homo sapiens GN=HNRNPH2 PE=1 SV=1	C	GO:0043232	intracellular non-membrane-bounded organelle
P55795	HNRH2_HUMANHeterogeneous nuclear ribonucleoprotein H2 OS=Homo sapiens GN=HNRNPH2 PE=1 SV=1	C	GO:0071013	catalytic step 2 spliceosome
P55795	HNRH2_HUMANHeterogeneous nuclear ribonucleoprotein H2 OS=Homo sapiens GN=HNRNPH2 PE=1 SV=1	F	GO:0000166	nucleotide binding
P55795	HNRH2_HUMANHeterogeneous nuclear ribonucleoprotein H2 OS=Homo sapiens GN=HNRNPH2 PE=1 SV=1	F	GO:0005515	protein binding
P55795	HNRH2_HUMANHeterogeneous nuclear ribonucleoprotein H2 OS=Homo sapiens GN=HNRNPH2 PE=1 SV=1	F	GO:0008266	poly(U) RNA binding
P55795	HNRH2_HUMANHeterogeneous nuclear ribonucleoprotein H2 OS=Homo sapiens GN=HNRNPH2 PE=1 SV=1	N	GO:0044822
P55795	HNRH2_HUMANHeterogeneous nuclear ribonucleoprotein H2 OS=Homo sapiens GN=HNRNPH2 PE=1 SV=1	P	GO:0000398	mRNA splicing, via spliceosome
P55795	HNRH2_HUMANHeterogeneous nuclear ribonucleoprotein H2 OS=Homo sapiens GN=HNRNPH2 PE=1 SV=1	P	GO:0043484	regulation of RNA splicing
P07205	PGK2_HUMANPhosphoglycerate kinase 2 OS=Homo sapiens GN=PGK2 PE=1 SV=3	C	GO:0005634	nucleus
P07205	PGK2_HUMANPhosphoglycerate kinase 2 OS=Homo sapiens GN=PGK2 PE=1 SV=3	C	GO:0005737	cytoplasm
P07205	PGK2_HUMANPhosphoglycerate kinase 2 OS=Homo sapiens GN=PGK2 PE=1 SV=3	C	GO:0045121	membrane raft
P07205	PGK2_HUMANPhosphoglycerate kinase 2 OS=Homo sapiens GN=PGK2 PE=1 SV=3	C	GO:0070062	extracellular vesicular exosome
P07205	PGK2_HUMANPhosphoglycerate kinase 2 OS=Homo sapiens GN=PGK2 PE=1 SV=3	F	GO:0000166	nucleotide binding
P07205	PGK2_HUMANPhosphoglycerate kinase 2 OS=Homo sapiens GN=PGK2 PE=1 SV=3	F	GO:0004618	phosphoglycerate kinase activity
P07205	PGK2_HUMANPhosphoglycerate kinase 2 OS=Homo sapiens GN=PGK2 PE=1 SV=3	F	GO:0005515	protein binding
P07205	PGK2_HUMANPhosphoglycerate kinase 2 OS=Homo sapiens GN=PGK2 PE=1 SV=3	P	GO:0006096	glycolysis
P07205	PGK2_HUMANPhosphoglycerate kinase 2 OS=Homo sapiens GN=PGK2 PE=1 SV=3	P	GO:0030855	epithelial cell differentiation
P07205	PGK2_HUMANPhosphoglycerate kinase 2 OS=Homo sapiens GN=PGK2 PE=1 SV=3	N	GO:0098779
P07205	PGK2_HUMANPhosphoglycerate kinase 2 OS=Homo sapiens GN=PGK2 PE=1 SV=3	P	GO:0006094	gluconeogenesis
P07205	PGK2_HUMANPhosphoglycerate kinase 2 OS=Homo sapiens GN=PGK2 PE=1 SV=3	P	GO:0015976	carbon utilization
B2RA03	type I cytoskeletal 18 OS=Homo sapiens GN=KRT18 PE=1 SV=2	C	GO:0034451	centriolar satellite
B2RA03	type I cytoskeletal 18 OS=Homo sapiens GN=KRT18 PE=1 SV=2	C	GO:0045095	keratin filament
B2RA03	type I cytoskeletal 18 OS=Homo sapiens GN=KRT18 PE=1 SV=2	C	GO:0070062	extracellular vesicular exosome
B2RA03	type I cytoskeletal 18 OS=Homo sapiens GN=KRT18 PE=1 SV=2	C	GO:0071944	cell periphery
B2RA03	type I cytoskeletal 18 OS=Homo sapiens GN=KRT18 PE=1 SV=2	F	GO:0005198	structural molecule activity
B2RA03	type I cytoskeletal 18 OS=Homo sapiens GN=KRT18 PE=1 SV=2	N	GO:0044822
B2RA03	type I cytoskeletal 18 OS=Homo sapiens GN=KRT18 PE=1 SV=2	F	GO:0097110	scaffold protein binding
B2RA03	type I cytoskeletal 18 OS=Homo sapiens GN=KRT18 PE=1 SV=2	P	GO:0007165	signal transduction
B2RA03	type I cytoskeletal 18 OS=Homo sapiens GN=KRT18 PE=1 SV=2	P	GO:0009653	anatomical structure morphogenesis
B2RA03	type I cytoskeletal 18 OS=Homo sapiens GN=KRT18 PE=1 SV=2	P	GO:0022607	cellular component assembly
B2RA03	type I cytoskeletal 18 OS=Homo sapiens GN=KRT18 PE=1 SV=2	P	GO:0030154	cell differentiation
B2RA03	type I cytoskeletal 18 OS=Homo sapiens GN=KRT18 PE=1 SV=2	P	GO:0042221	response to chemical stimulus
B2RA03	type I cytoskeletal 18 OS=Homo sapiens GN=KRT18 PE=1 SV=2	P	GO:0043000	Golgi to plasma membrane CFTR protein transport
B2RA03	type I cytoskeletal 18 OS=Homo sapiens GN=KRT18 PE=1 SV=2	P	GO:0043066	negative regulation of apoptotic process
B2RA03	type I cytoskeletal 18 OS=Homo sapiens GN=KRT18 PE=1 SV=2	P	GO:0044707	single-multicellular organism process
B2RA03	type I cytoskeletal 18 OS=Homo sapiens GN=KRT18 PE=1 SV=2	P	GO:0045104	intermediate filament cytoskeleton organization
B2RA03	type I cytoskeletal 18 OS=Homo sapiens GN=KRT18 PE=1 SV=2	P	GO:0060429	epithelium development
B4DH89	AL1A2_HUMANRetinal dehydrogenase 2 OS=Homo sapiens GN=ALDH1A2 PE=1 SV=3	C	GO:0005739	mitochondrion
B4DH89	AL1A2_HUMANRetinal dehydrogenase 2 OS=Homo sapiens GN=ALDH1A2 PE=1 SV=3	C	GO:0005829	cytosol
B4DH89	AL1A2_HUMANRetinal dehydrogenase 2 OS=Homo sapiens GN=ALDH1A2 PE=1 SV=3	C	GO:0070013	intracellular organelle lumen
B4DH89	AL1A2_HUMANRetinal dehydrogenase 2 OS=Homo sapiens GN=ALDH1A2 PE=1 SV=3	C	GO:0070062	extracellular vesicular exosome
B4DH89	AL1A2_HUMANRetinal dehydrogenase 2 OS=Homo sapiens GN=ALDH1A2 PE=1 SV=3	F	GO:0004029	aldehyde dehydrogenase (NAD) activity
B4DH89	AL1A2_HUMANRetinal dehydrogenase 2 OS=Homo sapiens GN=ALDH1A2 PE=1 SV=3	F	GO:0004030	aldehyde dehydrogenase [NAD(P)+] activity
B4DH89	AL1A2_HUMANRetinal dehydrogenase 2 OS=Homo sapiens GN=ALDH1A2 PE=1 SV=3	F	GO:0036094	small molecule binding
B4DH89	AL1A2_HUMANRetinal dehydrogenase 2 OS=Homo sapiens GN=ALDH1A2 PE=1 SV=3	F	GO:0042803	protein homodimerization activity
B4DH89	AL1A2_HUMANRetinal dehydrogenase 2 OS=Homo sapiens GN=ALDH1A2 PE=1 SV=3	F	GO:0097159	organic cyclic compound binding
B4DH89	AL1A2_HUMANRetinal dehydrogenase 2 OS=Homo sapiens GN=ALDH1A2 PE=1 SV=3	P	GO:0007417	central nervous system development
B4DH89	AL1A2_HUMANRetinal dehydrogenase 2 OS=Homo sapiens GN=ALDH1A2 PE=1 SV=3	P	GO:0007423	sensory organ development
B4DH89	AL1A2_HUMANRetinal dehydrogenase 2 OS=Homo sapiens GN=ALDH1A2 PE=1 SV=3	P	GO:0008285	negative regulation of cell proliferation
B4DH89	AL1A2_HUMANRetinal dehydrogenase 2 OS=Homo sapiens GN=ALDH1A2 PE=1 SV=3	P	GO:0021915	neural tube development
B4DH89	AL1A2_HUMANRetinal dehydrogenase 2 OS=Homo sapiens GN=ALDH1A2 PE=1 SV=3	P	GO:0034097	response to cytokine stimulus
B4DH89	AL1A2_HUMANRetinal dehydrogenase 2 OS=Homo sapiens GN=ALDH1A2 PE=1 SV=3	P	GO:0034308	primary alcohol metabolic process
B4DH89	AL1A2_HUMANRetinal dehydrogenase 2 OS=Homo sapiens GN=ALDH1A2 PE=1 SV=3	P	GO:0042573	retinoic acid metabolic process
B4DH89	AL1A2_HUMANRetinal dehydrogenase 2 OS=Homo sapiens GN=ALDH1A2 PE=1 SV=3	P	GO:0042574	retinal metabolic process
B4DH89	AL1A2_HUMANRetinal dehydrogenase 2 OS=Homo sapiens GN=ALDH1A2 PE=1 SV=3	P	GO:0048518	positive regulation of biological process
B4DH89	AL1A2_HUMANRetinal dehydrogenase 2 OS=Homo sapiens GN=ALDH1A2 PE=1 SV=3	P	GO:0048568	embryonic organ development
B4DH89	AL1A2_HUMANRetinal dehydrogenase 2 OS=Homo sapiens GN=ALDH1A2 PE=1 SV=3	P	GO:0048598	embryonic morphogenesis
B4DH89	AL1A2_HUMANRetinal dehydrogenase 2 OS=Homo sapiens GN=ALDH1A2 PE=1 SV=3	P	GO:0055114	oxidation-reduction process
B4DH89	AL1A2_HUMANRetinal dehydrogenase 2 OS=Homo sapiens GN=ALDH1A2 PE=1 SV=3	P	GO:0060322	head development
B4DH89	AL1A2_HUMANRetinal dehydrogenase 2 OS=Homo sapiens GN=ALDH1A2 PE=1 SV=3	P	GO:0006094	gluconeogenesis
B4DH89	AL1A2_HUMANRetinal dehydrogenase 2 OS=Homo sapiens GN=ALDH1A2 PE=1 SV=3	P	GO:0006096	glycolysis
B4DH89	AL1A2_HUMANRetinal dehydrogenase 2 OS=Homo sapiens GN=ALDH1A2 PE=1 SV=3	P	GO:0006525	arginine metabolic process
B4DH89	AL1A2_HUMANRetinal dehydrogenase 2 OS=Homo sapiens GN=ALDH1A2 PE=1 SV=3	P	GO:0006547	histidine metabolic process
B4DH89	AL1A2_HUMANRetinal dehydrogenase 2 OS=Homo sapiens GN=ALDH1A2 PE=1 SV=3	P	GO:0006550	isoleucine catabolic process
B4DH89	AL1A2_HUMANRetinal dehydrogenase 2 OS=Homo sapiens GN=ALDH1A2 PE=1 SV=3	P	GO:0006552	leucine catabolic process
B4DH89	AL1A2_HUMANRetinal dehydrogenase 2 OS=Homo sapiens GN=ALDH1A2 PE=1 SV=3	P	GO:0006554	lysine catabolic process
B4DH89	AL1A2_HUMANRetinal dehydrogenase 2 OS=Homo sapiens GN=ALDH1A2 PE=1 SV=3	P	GO:0006560	proline metabolic process
B4DH89	AL1A2_HUMANRetinal dehydrogenase 2 OS=Homo sapiens GN=ALDH1A2 PE=1 SV=3	P	GO:0006568	tryptophan metabolic process
B4DH89	AL1A2_HUMANRetinal dehydrogenase 2 OS=Homo sapiens GN=ALDH1A2 PE=1 SV=3	P	GO:0006574	valine catabolic process
B4DH89	AL1A2_HUMANRetinal dehydrogenase 2 OS=Homo sapiens GN=ALDH1A2 PE=1 SV=3	P	GO:0006631	fatty acid metabolic process
B4DH89	AL1A2_HUMANRetinal dehydrogenase 2 OS=Homo sapiens GN=ALDH1A2 PE=1 SV=3	P	GO:0006699	bile acid biosynthetic process
B4DH89	AL1A2_HUMANRetinal dehydrogenase 2 OS=Homo sapiens GN=ALDH1A2 PE=1 SV=3	P	GO:0019260	1,2-dichloroethane catabolic process
B4DH89	AL1A2_HUMANRetinal dehydrogenase 2 OS=Homo sapiens GN=ALDH1A2 PE=1 SV=3	P	GO:0019482	beta-alanine metabolic process
B4DH89	AL1A2_HUMANRetinal dehydrogenase 2 OS=Homo sapiens GN=ALDH1A2 PE=1 SV=3	P	GO:0019852	L-ascorbic acid metabolic process
B4DH89	AL1A2_HUMANRetinal dehydrogenase 2 OS=Homo sapiens GN=ALDH1A2 PE=1 SV=3	P	GO:0046251	limonene catabolic process
B4DH89	AL1A2_HUMANRetinal dehydrogenase 2 OS=Homo sapiens GN=ALDH1A2 PE=1 SV=3	P	GO:0046486	glycerolipid metabolic process
B4DH89	AL1A2_HUMANRetinal dehydrogenase 2 OS=Homo sapiens GN=ALDH1A2 PE=1 SV=3	P	GO:0006558	L-phenylalanine metabolic process
B4DH89	AL1A2_HUMANRetinal dehydrogenase 2 OS=Homo sapiens GN=ALDH1A2 PE=1 SV=3	P	GO:0006570	tyrosine metabolic process
P08727	type I cytoskeletal 19 OS=Homo sapiens GN=KRT19 PE=1 SV=4	C	GO:0005634	nucleus
P08727	type I cytoskeletal 19 OS=Homo sapiens GN=KRT19 PE=1 SV=4	C	GO:0043034	costamere
P08727	type I cytoskeletal 19 OS=Homo sapiens GN=KRT19 PE=1 SV=4	C	GO:0045095	keratin filament
P08727	type I cytoskeletal 19 OS=Homo sapiens GN=KRT19 PE=1 SV=4	C	GO:0070062	extracellular vesicular exosome
P08727	type I cytoskeletal 19 OS=Homo sapiens GN=KRT19 PE=1 SV=4	F	GO:0005200	structural constituent of cytoskeleton
P08727	type I cytoskeletal 19 OS=Homo sapiens GN=KRT19 PE=1 SV=4	F	GO:0008307	structural constituent of muscle
P08727	type I cytoskeletal 19 OS=Homo sapiens GN=KRT19 PE=1 SV=4	F	GO:0032395	MHC class II receptor activity
P08727	type I cytoskeletal 19 OS=Homo sapiens GN=KRT19 PE=1 SV=4	F	GO:0042289	MHC class II protein binding
P08727	type I cytoskeletal 19 OS=Homo sapiens GN=KRT19 PE=1 SV=4	N	GO:1990254
P08727	type I cytoskeletal 19 OS=Homo sapiens GN=KRT19 PE=1 SV=4	P	GO:0006950	response to stress
P08727	type I cytoskeletal 19 OS=Homo sapiens GN=KRT19 PE=1 SV=4	P	GO:0007165	signal transduction
P08727	type I cytoskeletal 19 OS=Homo sapiens GN=KRT19 PE=1 SV=4	P	GO:0007568	aging
P08727	type I cytoskeletal 19 OS=Homo sapiens GN=KRT19 PE=1 SV=4	P	GO:0008544	epidermis development
P08727	type I cytoskeletal 19 OS=Homo sapiens GN=KRT19 PE=1 SV=4	P	GO:0030336	negative regulation of cell migration
P08727	type I cytoskeletal 19 OS=Homo sapiens GN=KRT19 PE=1 SV=4	P	GO:0030855	epithelial cell differentiation
P08727	type I cytoskeletal 19 OS=Homo sapiens GN=KRT19 PE=1 SV=4	P	GO:0042633	hair cycle
P08727	type I cytoskeletal 19 OS=Homo sapiens GN=KRT19 PE=1 SV=4	P	GO:0043588	skin development
P08727	type I cytoskeletal 19 OS=Homo sapiens GN=KRT19 PE=1 SV=4	P	GO:0043627	response to estrogen stimulus
P08727	type I cytoskeletal 19 OS=Homo sapiens GN=KRT19 PE=1 SV=4	P	GO:0045110	intermediate filament bundle assembly
P08727	type I cytoskeletal 19 OS=Homo sapiens GN=KRT19 PE=1 SV=4	P	GO:0045214	sarcomere organization
P08727	type I cytoskeletal 19 OS=Homo sapiens GN=KRT19 PE=1 SV=4	C	GO:0042613	MHC class II protein complex
O15247	CLIC2_HUMANChloride intracellular channel protein 2 OS=Homo sapiens GN=CLIC2 PE=1 SV=3	C	GO:0005815	microtubule organizing center
O15247	CLIC2_HUMANChloride intracellular channel protein 2 OS=Homo sapiens GN=CLIC2 PE=1 SV=3	C	GO:0005902	microvillus
O15247	CLIC2_HUMANChloride intracellular channel protein 2 OS=Homo sapiens GN=CLIC2 PE=1 SV=3	C	GO:0012505	endomembrane system
O15247	CLIC2_HUMANChloride intracellular channel protein 2 OS=Homo sapiens GN=CLIC2 PE=1 SV=3	C	GO:0016020	membrane
O15247	CLIC2_HUMANChloride intracellular channel protein 2 OS=Homo sapiens GN=CLIC2 PE=1 SV=3	C	GO:0030054	cell junction
O15247	CLIC2_HUMANChloride intracellular channel protein 2 OS=Homo sapiens GN=CLIC2 PE=1 SV=3	C	GO:0031988	membrane-bounded vesicle
O15247	CLIC2_HUMANChloride intracellular channel protein 2 OS=Homo sapiens GN=CLIC2 PE=1 SV=3	C	GO:0044421	extracellular region part
O15247	CLIC2_HUMANChloride intracellular channel protein 2 OS=Homo sapiens GN=CLIC2 PE=1 SV=3	C	GO:0044428	nuclear part
O15247	CLIC2_HUMANChloride intracellular channel protein 2 OS=Homo sapiens GN=CLIC2 PE=1 SV=3	C	GO:0044444	cytoplasmic part
O15247	CLIC2_HUMANChloride intracellular channel protein 2 OS=Homo sapiens GN=CLIC2 PE=1 SV=3	C	GO:0071944	cell periphery
O15247	CLIC2_HUMANChloride intracellular channel protein 2 OS=Homo sapiens GN=CLIC2 PE=1 SV=3	F	GO:0004364	glutathione transferase activity
O15247	CLIC2_HUMANChloride intracellular channel protein 2 OS=Homo sapiens GN=CLIC2 PE=1 SV=3	F	GO:0004602	glutathione peroxidase activity
O15247	CLIC2_HUMANChloride intracellular channel protein 2 OS=Homo sapiens GN=CLIC2 PE=1 SV=3	F	GO:0005254	chloride channel activity
O15247	CLIC2_HUMANChloride intracellular channel protein 2 OS=Homo sapiens GN=CLIC2 PE=1 SV=3	F	GO:0005515	protein binding
O15247	CLIC2_HUMANChloride intracellular channel protein 2 OS=Homo sapiens GN=CLIC2 PE=1 SV=3	P	GO:0009653	anatomical structure morphogenesis
O15247	CLIC2_HUMANChloride intracellular channel protein 2 OS=Homo sapiens GN=CLIC2 PE=1 SV=3	P	GO:0009913	epidermal cell differentiation
O15247	CLIC2_HUMANChloride intracellular channel protein 2 OS=Homo sapiens GN=CLIC2 PE=1 SV=3	P	GO:0010881	regulation of cardiac muscle contraction by regulation of the release of sequestered calcium ion
O15247	CLIC2_HUMANChloride intracellular channel protein 2 OS=Homo sapiens GN=CLIC2 PE=1 SV=3	P	GO:0048513	organ development
O15247	CLIC2_HUMANChloride intracellular channel protein 2 OS=Homo sapiens GN=CLIC2 PE=1 SV=3	P	GO:0050877	neurological system process
O15247	CLIC2_HUMANChloride intracellular channel protein 2 OS=Homo sapiens GN=CLIC2 PE=1 SV=3	P	GO:0051099	positive regulation of binding
O15247	CLIC2_HUMANChloride intracellular channel protein 2 OS=Homo sapiens GN=CLIC2 PE=1 SV=3	P	GO:0055114	oxidation-reduction process
O15247	CLIC2_HUMANChloride intracellular channel protein 2 OS=Homo sapiens GN=CLIC2 PE=1 SV=3	P	GO:0060315	negative regulation of ryanodine-sensitive calcium-release channel activity
O15247	CLIC2_HUMANChloride intracellular channel protein 2 OS=Homo sapiens GN=CLIC2 PE=1 SV=3	N	GO:1902476
O15247	CLIC2_HUMANChloride intracellular channel protein 2 OS=Homo sapiens GN=CLIC2 PE=1 SV=3	P	GO:0006749	glutathione metabolic process
O15247	CLIC2_HUMANChloride intracellular channel protein 2 OS=Homo sapiens GN=CLIC2 PE=1 SV=3	P	GO:0006803	glutathione conjugation reaction
O15247	CLIC2_HUMANChloride intracellular channel protein 2 OS=Homo sapiens GN=CLIC2 PE=1 SV=3	P	GO:0006804	peroxidase reaction
O15247	CLIC2_HUMANChloride intracellular channel protein 2 OS=Homo sapiens GN=CLIC2 PE=1 SV=3	P	GO:0006979	response to oxidative stress
A0A024RDE8	PDLI5_HUMANPDZ and LIM domain protein 5 OS=Homo sapiens GN=PDLIM5 PE=1 SV=5	C	GO:0015629	actin cytoskeleton
A0A024RDE8	PDLI5_HUMANPDZ and LIM domain protein 5 OS=Homo sapiens GN=PDLIM5 PE=1 SV=5	C	GO:0016020	membrane
A0A024RDE8	PDLI5_HUMANPDZ and LIM domain protein 5 OS=Homo sapiens GN=PDLIM5 PE=1 SV=5	C	GO:0042995	cell projection
A0A024RDE8	PDLI5_HUMANPDZ and LIM domain protein 5 OS=Homo sapiens GN=PDLIM5 PE=1 SV=5	C	GO:0044422	organelle part
A0A024RDE8	PDLI5_HUMANPDZ and LIM domain protein 5 OS=Homo sapiens GN=PDLIM5 PE=1 SV=5	C	GO:0044444	cytoplasmic part
A0A024RDE8	PDLI5_HUMANPDZ and LIM domain protein 5 OS=Homo sapiens GN=PDLIM5 PE=1 SV=5	C	GO:0045202	synapse
A0A024RDE8	PDLI5_HUMANPDZ and LIM domain protein 5 OS=Homo sapiens GN=PDLIM5 PE=1 SV=5	F	GO:0008092	cytoskeletal protein binding
A0A024RDE8	PDLI5_HUMANPDZ and LIM domain protein 5 OS=Homo sapiens GN=PDLIM5 PE=1 SV=5	F	GO:0008270	zinc ion binding
A0A024RDE8	PDLI5_HUMANPDZ and LIM domain protein 5 OS=Homo sapiens GN=PDLIM5 PE=1 SV=5	P	GO:0007166	cell surface receptor signaling pathway
A0A024RDE8	PDLI5_HUMANPDZ and LIM domain protein 5 OS=Homo sapiens GN=PDLIM5 PE=1 SV=5	P	GO:0009888	tissue development
A0A024RDE8	PDLI5_HUMANPDZ and LIM domain protein 5 OS=Homo sapiens GN=PDLIM5 PE=1 SV=5	P	GO:0010769	regulation of cell morphogenesis involved in differentiation
A0A024RDE8	PDLI5_HUMANPDZ and LIM domain protein 5 OS=Homo sapiens GN=PDLIM5 PE=1 SV=5	P	GO:0019222	regulation of metabolic process
A0A024RDE8	PDLI5_HUMANPDZ and LIM domain protein 5 OS=Homo sapiens GN=PDLIM5 PE=1 SV=5	P	GO:0048513	organ development
A0A024RDE8	PDLI5_HUMANPDZ and LIM domain protein 5 OS=Homo sapiens GN=PDLIM5 PE=1 SV=5	P	GO:0048522	positive regulation of cellular process
A0A024RDE8	PDLI5_HUMANPDZ and LIM domain protein 5 OS=Homo sapiens GN=PDLIM5 PE=1 SV=5	P	GO:0048523	negative regulation of cellular process
A0A024RDE8	PDLI5_HUMANPDZ and LIM domain protein 5 OS=Homo sapiens GN=PDLIM5 PE=1 SV=5	P	GO:0061061	muscle structure development
A0A024RDE8	PDLI5_HUMANPDZ and LIM domain protein 5 OS=Homo sapiens GN=PDLIM5 PE=1 SV=5	P	GO:2000026	regulation of multicellular organismal development
Q06787	FMR1_HUMANFragile X mental retardation protein 1 OS=Homo sapiens GN=FMR1 PE=1 SV=1	C	GO:0005654	nucleoplasm
Q06787	FMR1_HUMANFragile X mental retardation protein 1 OS=Homo sapiens GN=FMR1 PE=1 SV=1	C	GO:0005730	nucleolus
Q06787	FMR1_HUMANFragile X mental retardation protein 1 OS=Homo sapiens GN=FMR1 PE=1 SV=1	C	GO:0016020	membrane
Q06787	FMR1_HUMANFragile X mental retardation protein 1 OS=Homo sapiens GN=FMR1 PE=1 SV=1	N	GO:0036464
Q06787	FMR1_HUMANFragile X mental retardation protein 1 OS=Homo sapiens GN=FMR1 PE=1 SV=1	C	GO:0042788	polysomal ribosome
Q06787	FMR1_HUMANFragile X mental retardation protein 1 OS=Homo sapiens GN=FMR1 PE=1 SV=1	F	GO:0003729	mRNA binding
Q06787	FMR1_HUMANFragile X mental retardation protein 1 OS=Homo sapiens GN=FMR1 PE=1 SV=1	F	GO:0005515	protein binding
Q06787	FMR1_HUMANFragile X mental retardation protein 1 OS=Homo sapiens GN=FMR1 PE=1 SV=1	P	GO:0007275	multicellular organismal development
Q06787	FMR1_HUMANFragile X mental retardation protein 1 OS=Homo sapiens GN=FMR1 PE=1 SV=1	P	GO:0017148	negative regulation of translation
Q06787	FMR1_HUMANFragile X mental retardation protein 1 OS=Homo sapiens GN=FMR1 PE=1 SV=1	P	GO:0044763	single-organism cellular process
E9PJK1	CD81_HUMANCD81 antigen OS=Homo sapiens GN=CD81 PE=1 SV=1	C	GO:0001772	immunological synapse
E9PJK1	CD81_HUMANCD81 antigen OS=Homo sapiens GN=CD81 PE=1 SV=1	C	GO:0005887	integral to plasma membrane
E9PJK1	CD81_HUMANCD81 antigen OS=Homo sapiens GN=CD81 PE=1 SV=1	C	GO:0005925	focal adhesion
E9PJK1	CD81_HUMANCD81 antigen OS=Homo sapiens GN=CD81 PE=1 SV=1	C	GO:0012505	endomembrane system
E9PJK1	CD81_HUMANCD81 antigen OS=Homo sapiens GN=CD81 PE=1 SV=1	C	GO:0043231	intracellular membrane-bounded organelle
E9PJK1	CD81_HUMANCD81 antigen OS=Homo sapiens GN=CD81 PE=1 SV=1	C	GO:0044444	cytoplasmic part
E9PJK1	CD81_HUMANCD81 antigen OS=Homo sapiens GN=CD81 PE=1 SV=1	C	GO:0044446	intracellular organelle part
E9PJK1	CD81_HUMANCD81 antigen OS=Homo sapiens GN=CD81 PE=1 SV=1	C	GO:0070062	extracellular vesicular exosome
E9PJK1	CD81_HUMANCD81 antigen OS=Homo sapiens GN=CD81 PE=1 SV=1	N	GO:0098805
E9PJK1	CD81_HUMANCD81 antigen OS=Homo sapiens GN=CD81 PE=1 SV=1	F	GO:0023026	MHC class II protein complex binding
E9PJK1	CD81_HUMANCD81 antigen OS=Homo sapiens GN=CD81 PE=1 SV=1	N	GO:1990459
E9PJK1	CD81_HUMANCD81 antigen OS=Homo sapiens GN=CD81 PE=1 SV=1	P	GO:0000187	activation of MAPK activity
E9PJK1	CD81_HUMANCD81 antigen OS=Homo sapiens GN=CD81 PE=1 SV=1	P	GO:0030890	positive regulation of B cell proliferation
E9PJK1	CD81_HUMANCD81 antigen OS=Homo sapiens GN=CD81 PE=1 SV=1	P	GO:0031647	regulation of protein stability
E9PJK1	CD81_HUMANCD81 antigen OS=Homo sapiens GN=CD81 PE=1 SV=1	P	GO:0043128	positive regulation of 1-phosphatidylinositol 4-kinase activity
E9PJK1	CD81_HUMANCD81 antigen OS=Homo sapiens GN=CD81 PE=1 SV=1	P	GO:0044707	single-multicellular organism process
E9PJK1	CD81_HUMANCD81 antigen OS=Homo sapiens GN=CD81 PE=1 SV=1	P	GO:0045944	positive regulation of transcription from RNA polymerase II promoter
E9PJK1	CD81_HUMANCD81 antigen OS=Homo sapiens GN=CD81 PE=1 SV=1	P	GO:0046718	viral entry into host cell
E9PJK1	CD81_HUMANCD81 antigen OS=Homo sapiens GN=CD81 PE=1 SV=1	P	GO:0046813	virion attachment, binding of host cell surface receptor
E9PJK1	CD81_HUMANCD81 antigen OS=Homo sapiens GN=CD81 PE=1 SV=1	P	GO:0048869	cellular developmental process
E9PJK1	CD81_HUMANCD81 antigen OS=Homo sapiens GN=CD81 PE=1 SV=1	P	GO:0050731	positive regulation of peptidyl-tyrosine phosphorylation
E9PJK1	CD81_HUMANCD81 antigen OS=Homo sapiens GN=CD81 PE=1 SV=1	P	GO:0050776	regulation of immune response
E9PJK1	CD81_HUMANCD81 antigen OS=Homo sapiens GN=CD81 PE=1 SV=1	P	GO:0061462	protein localization to lysosome
E9PJK1	CD81_HUMANCD81 antigen OS=Homo sapiens GN=CD81 PE=1 SV=1	N	GO:1904352
Q96KR6	F210B_HUMANProtein FAM210B OS=Homo sapiens GN=FAM210B PE=1 SV=2	C	GO:0016020	membrane
B3KUB6	E41L1_HUMANBand -like protein 1 OS=Homo sapiens GN=EPB41L1 PE=1 SV=2	C	GO:0005634	nucleus
B3KUB6	E41L1_HUMANBand -like protein 1 OS=Homo sapiens GN=EPB41L1 PE=1 SV=2	C	GO:0005856	cytoskeleton
B3KUB6	E41L1_HUMANBand -like protein 1 OS=Homo sapiens GN=EPB41L1 PE=1 SV=2	C	GO:0005886	plasma membrane
B3KUB6	E41L1_HUMANBand -like protein 1 OS=Homo sapiens GN=EPB41L1 PE=1 SV=2	C	GO:0005938	cell cortex
B3KUB6	E41L1_HUMANBand -like protein 1 OS=Homo sapiens GN=EPB41L1 PE=1 SV=2	C	GO:0019898	extrinsic to membrane
B3KUB6	E41L1_HUMANBand -like protein 1 OS=Homo sapiens GN=EPB41L1 PE=1 SV=2	C	GO:0030054	cell junction
B3KUB6	E41L1_HUMANBand -like protein 1 OS=Homo sapiens GN=EPB41L1 PE=1 SV=2	C	GO:0043005	neuron projection
B3KUB6	E41L1_HUMANBand -like protein 1 OS=Homo sapiens GN=EPB41L1 PE=1 SV=2	C	GO:0044463	cell projection part
B3KUB6	E41L1_HUMANBand -like protein 1 OS=Homo sapiens GN=EPB41L1 PE=1 SV=2	F	GO:0003779	actin binding
B3KUB6	E41L1_HUMANBand -like protein 1 OS=Homo sapiens GN=EPB41L1 PE=1 SV=2	F	GO:0005198	structural molecule activity
B3KUB6	E41L1_HUMANBand -like protein 1 OS=Homo sapiens GN=EPB41L1 PE=1 SV=2	P	GO:0000902	cell morphogenesis
B3KUB6	E41L1_HUMANBand -like protein 1 OS=Homo sapiens GN=EPB41L1 PE=1 SV=2	P	GO:0007154	cell communication
B3KUB6	E41L1_HUMANBand -like protein 1 OS=Homo sapiens GN=EPB41L1 PE=1 SV=2	P	GO:0007399	nervous system development
B3KUB6	E41L1_HUMANBand -like protein 1 OS=Homo sapiens GN=EPB41L1 PE=1 SV=2	P	GO:0009888	tissue development
B3KUB6	E41L1_HUMANBand -like protein 1 OS=Homo sapiens GN=EPB41L1 PE=1 SV=2	P	GO:0030866	cortical actin cytoskeleton organization
B3KUB6	E41L1_HUMANBand -like protein 1 OS=Homo sapiens GN=EPB41L1 PE=1 SV=2	P	GO:0034613	cellular protein localization
B3KUB6	E41L1_HUMANBand -like protein 1 OS=Homo sapiens GN=EPB41L1 PE=1 SV=2	P	GO:0044700	single organism signaling
B3KUB6	E41L1_HUMANBand -like protein 1 OS=Homo sapiens GN=EPB41L1 PE=1 SV=2	P	GO:0048468	cell development
B3KUB6	E41L1_HUMANBand -like protein 1 OS=Homo sapiens GN=EPB41L1 PE=1 SV=2	P	GO:0048522	positive regulation of cellular process
B3KUB6	E41L1_HUMANBand -like protein 1 OS=Homo sapiens GN=EPB41L1 PE=1 SV=2	P	GO:0051128	regulation of cellular component organization
B3KUB6	E41L1_HUMANBand -like protein 1 OS=Homo sapiens GN=EPB41L1 PE=1 SV=2	P	GO:0065009	regulation of molecular function
P37059	DHB2_HUMANEstradiol 17-beta-dehydrogenase 2 OS=Homo sapiens GN=HSD17B2 PE=1 SV=1	C	GO:0005789	endoplasmic reticulum membrane
P37059	DHB2_HUMANEstradiol 17-beta-dehydrogenase 2 OS=Homo sapiens GN=HSD17B2 PE=1 SV=1	F	GO:0004303	estradiol 17-beta-dehydrogenase activity
P37059	DHB2_HUMANEstradiol 17-beta-dehydrogenase 2 OS=Homo sapiens GN=HSD17B2 PE=1 SV=1	F	GO:0047006	17-alpha,20-alpha-dihydroxypregn-4-en-3-one dehydrogenase activity
P37059	DHB2_HUMANEstradiol 17-beta-dehydrogenase 2 OS=Homo sapiens GN=HSD17B2 PE=1 SV=1	F	GO:0047035	testosterone dehydrogenase (NAD+) activity
P37059	DHB2_HUMANEstradiol 17-beta-dehydrogenase 2 OS=Homo sapiens GN=HSD17B2 PE=1 SV=1	P	GO:0008610	lipid biosynthetic process
P37059	DHB2_HUMANEstradiol 17-beta-dehydrogenase 2 OS=Homo sapiens GN=HSD17B2 PE=1 SV=1	P	GO:0032526	response to retinoic acid
P37059	DHB2_HUMANEstradiol 17-beta-dehydrogenase 2 OS=Homo sapiens GN=HSD17B2 PE=1 SV=1	P	GO:0044281	small molecule metabolic process
P37059	DHB2_HUMANEstradiol 17-beta-dehydrogenase 2 OS=Homo sapiens GN=HSD17B2 PE=1 SV=1	P	GO:0044707	single-multicellular organism process
P37059	DHB2_HUMANEstradiol 17-beta-dehydrogenase 2 OS=Homo sapiens GN=HSD17B2 PE=1 SV=1	P	GO:0008209	androgen metabolic process
P37059	DHB2_HUMANEstradiol 17-beta-dehydrogenase 2 OS=Homo sapiens GN=HSD17B2 PE=1 SV=1	P	GO:0008210	estrogen metabolic process
P37059	DHB2_HUMANEstradiol 17-beta-dehydrogenase 2 OS=Homo sapiens GN=HSD17B2 PE=1 SV=1	P	GO:0008207	C21-steroid hormone metabolic process
Q99536	VAT1_HUMANSynaptic vesicle membrane protein VAT-1 homolog OS=Homo sapiens GN=VAT1 PE=1 SV=2	C	GO:0016021	integral to membrane
Q99536	VAT1_HUMANSynaptic vesicle membrane protein VAT-1 homolog OS=Homo sapiens GN=VAT1 PE=1 SV=2	C	GO:0043231	intracellular membrane-bounded organelle
Q99536	VAT1_HUMANSynaptic vesicle membrane protein VAT-1 homolog OS=Homo sapiens GN=VAT1 PE=1 SV=2	C	GO:0070062	extracellular vesicular exosome
Q99536	VAT1_HUMANSynaptic vesicle membrane protein VAT-1 homolog OS=Homo sapiens GN=VAT1 PE=1 SV=2	F	GO:0004312	fatty acid synthase activity
Q99536	VAT1_HUMANSynaptic vesicle membrane protein VAT-1 homolog OS=Homo sapiens GN=VAT1 PE=1 SV=2	F	GO:0008270	zinc ion binding
Q99536	VAT1_HUMANSynaptic vesicle membrane protein VAT-1 homolog OS=Homo sapiens GN=VAT1 PE=1 SV=2	F	GO:0016491	oxidoreductase activity
Q99536	VAT1_HUMANSynaptic vesicle membrane protein VAT-1 homolog OS=Homo sapiens GN=VAT1 PE=1 SV=2	P	GO:0010637	negative regulation of mitochondrial fusion
Q99536	VAT1_HUMANSynaptic vesicle membrane protein VAT-1 homolog OS=Homo sapiens GN=VAT1 PE=1 SV=2	P	GO:0044281	small molecule metabolic process
Q99536	VAT1_HUMANSynaptic vesicle membrane protein VAT-1 homolog OS=Homo sapiens GN=VAT1 PE=1 SV=2	P	GO:0055114	oxidation-reduction process
Q99536	VAT1_HUMANSynaptic vesicle membrane protein VAT-1 homolog OS=Homo sapiens GN=VAT1 PE=1 SV=2	C	GO:0005835	fatty acid synthase complex
Q99536	VAT1_HUMANSynaptic vesicle membrane protein VAT-1 homolog OS=Homo sapiens GN=VAT1 PE=1 SV=2	P	GO:0006633	fatty acid biosynthetic process
Q99536	VAT1_HUMANSynaptic vesicle membrane protein VAT-1 homolog OS=Homo sapiens GN=VAT1 PE=1 SV=2	P	GO:0042967	acyl-carrier-protein biosynthetic process
B4DU58	CAPG_HUMANMacrophage-capping protein OS=Homo sapiens GN=CAPG PE=1 SV=2	C	GO:0005654	nucleoplasm
B4DU58	CAPG_HUMANMacrophage-capping protein OS=Homo sapiens GN=CAPG PE=1 SV=2	C	GO:0005730	nucleolus
B4DU58	CAPG_HUMANMacrophage-capping protein OS=Homo sapiens GN=CAPG PE=1 SV=2	C	GO:0005814	centriole
B4DU58	CAPG_HUMANMacrophage-capping protein OS=Homo sapiens GN=CAPG PE=1 SV=2	C	GO:0015629	actin cytoskeleton
B4DU58	CAPG_HUMANMacrophage-capping protein OS=Homo sapiens GN=CAPG PE=1 SV=2	C	GO:0042995	cell projection
B4DU58	CAPG_HUMANMacrophage-capping protein OS=Homo sapiens GN=CAPG PE=1 SV=2	C	GO:0043234	protein complex
B4DU58	CAPG_HUMANMacrophage-capping protein OS=Homo sapiens GN=CAPG PE=1 SV=2	C	GO:0070062	extracellular vesicular exosome
B4DU58	CAPG_HUMANMacrophage-capping protein OS=Homo sapiens GN=CAPG PE=1 SV=2	C	GO:0072686	mitotic spindle
B4DU58	CAPG_HUMANMacrophage-capping protein OS=Homo sapiens GN=CAPG PE=1 SV=2	C	GO:0090543	Flemming body
B4DU58	CAPG_HUMANMacrophage-capping protein OS=Homo sapiens GN=CAPG PE=1 SV=2	F	GO:0003779	actin binding
B4DU58	CAPG_HUMANMacrophage-capping protein OS=Homo sapiens GN=CAPG PE=1 SV=2	F	GO:0019904	protein domain specific binding
B4DU58	CAPG_HUMANMacrophage-capping protein OS=Homo sapiens GN=CAPG PE=1 SV=2	F	GO:0032403	protein complex binding
B4DU58	CAPG_HUMANMacrophage-capping protein OS=Homo sapiens GN=CAPG PE=1 SV=2	F	GO:0043167	ion binding
B4DU58	CAPG_HUMANMacrophage-capping protein OS=Homo sapiens GN=CAPG PE=1 SV=2	P	GO:0012501	programmed cell death
B4DU58	CAPG_HUMANMacrophage-capping protein OS=Homo sapiens GN=CAPG PE=1 SV=2	P	GO:0022617	extracellular matrix disassembly
B4DU58	CAPG_HUMANMacrophage-capping protein OS=Homo sapiens GN=CAPG PE=1 SV=2	P	GO:0032879	regulation of localization
B4DU58	CAPG_HUMANMacrophage-capping protein OS=Homo sapiens GN=CAPG PE=1 SV=2	P	GO:0044707	single-multicellular organism process
B4DU58	CAPG_HUMANMacrophage-capping protein OS=Homo sapiens GN=CAPG PE=1 SV=2	P	GO:0044767	single-organism developmental process
B4DU58	CAPG_HUMANMacrophage-capping protein OS=Homo sapiens GN=CAPG PE=1 SV=2	P	GO:0048856	anatomical structure development
B4DU58	CAPG_HUMANMacrophage-capping protein OS=Homo sapiens GN=CAPG PE=1 SV=2	P	GO:0050793	regulation of developmental process
B4DU58	CAPG_HUMANMacrophage-capping protein OS=Homo sapiens GN=CAPG PE=1 SV=2	P	GO:0050896	response to stimulus
B4DU58	CAPG_HUMANMacrophage-capping protein OS=Homo sapiens GN=CAPG PE=1 SV=2	P	GO:0051016	barbed-end actin filament capping
B4DU58	CAPG_HUMANMacrophage-capping protein OS=Homo sapiens GN=CAPG PE=1 SV=2	P	GO:0051239	regulation of multicellular organismal process
B4DU58	CAPG_HUMANMacrophage-capping protein OS=Homo sapiens GN=CAPG PE=1 SV=2	P	GO:0071803	positive regulation of podosome assembly
C9J2P0	UB2E1_HUMANUbiquitin-conjugating enzyme E2 E1 OS=Homo sapiens GN=UBE2E1 PE=1 SV=1	C	GO:0000151	ubiquitin ligase complex
C9J2P0	UB2E1_HUMANUbiquitin-conjugating enzyme E2 E1 OS=Homo sapiens GN=UBE2E1 PE=1 SV=1	C	GO:0005654	nucleoplasm
C9J2P0	UB2E1_HUMANUbiquitin-conjugating enzyme E2 E1 OS=Homo sapiens GN=UBE2E1 PE=1 SV=1	C	GO:0005829	cytosol
C9J2P0	UB2E1_HUMANUbiquitin-conjugating enzyme E2 E1 OS=Homo sapiens GN=UBE2E1 PE=1 SV=1	F	GO:0005515	protein binding
C9J2P0	UB2E1_HUMANUbiquitin-conjugating enzyme E2 E1 OS=Homo sapiens GN=UBE2E1 PE=1 SV=1	F	GO:0042296	ISG15 ligase activity
C9J2P0	UB2E1_HUMANUbiquitin-conjugating enzyme E2 E1 OS=Homo sapiens GN=UBE2E1 PE=1 SV=1	N	GO:0061631
C9J2P0	UB2E1_HUMANUbiquitin-conjugating enzyme E2 E1 OS=Homo sapiens GN=UBE2E1 PE=1 SV=1	P	GO:0000090	mitotic anaphase
C9J2P0	UB2E1_HUMANUbiquitin-conjugating enzyme E2 E1 OS=Homo sapiens GN=UBE2E1 PE=1 SV=1	P	GO:0002224	toll-like receptor signaling pathway
C9J2P0	UB2E1_HUMANUbiquitin-conjugating enzyme E2 E1 OS=Homo sapiens GN=UBE2E1 PE=1 SV=1	P	GO:0006259	DNA metabolic process
C9J2P0	UB2E1_HUMANUbiquitin-conjugating enzyme E2 E1 OS=Homo sapiens GN=UBE2E1 PE=1 SV=1	P	GO:0006355	regulation of transcription, DNA-dependent
C9J2P0	UB2E1_HUMANUbiquitin-conjugating enzyme E2 E1 OS=Homo sapiens GN=UBE2E1 PE=1 SV=1	P	GO:0006974	response to DNA damage stimulus
C9J2P0	UB2E1_HUMANUbiquitin-conjugating enzyme E2 E1 OS=Homo sapiens GN=UBE2E1 PE=1 SV=1	P	GO:0007094	mitotic spindle assembly checkpoint
C9J2P0	UB2E1_HUMANUbiquitin-conjugating enzyme E2 E1 OS=Homo sapiens GN=UBE2E1 PE=1 SV=1	P	GO:0010390	histone monoubiquitination
C9J2P0	UB2E1_HUMANUbiquitin-conjugating enzyme E2 E1 OS=Homo sapiens GN=UBE2E1 PE=1 SV=1	P	GO:0010638	positive regulation of organelle organization
C9J2P0	UB2E1_HUMANUbiquitin-conjugating enzyme E2 E1 OS=Homo sapiens GN=UBE2E1 PE=1 SV=1	P	GO:0019221	cytokine-mediated signaling pathway
C9J2P0	UB2E1_HUMANUbiquitin-conjugating enzyme E2 E1 OS=Homo sapiens GN=UBE2E1 PE=1 SV=1	P	GO:0032020	ISG15-protein conjugation
C9J2P0	UB2E1_HUMANUbiquitin-conjugating enzyme E2 E1 OS=Homo sapiens GN=UBE2E1 PE=1 SV=1	P	GO:0033523	histone H2B ubiquitination
C9J2P0	UB2E1_HUMANUbiquitin-conjugating enzyme E2 E1 OS=Homo sapiens GN=UBE2E1 PE=1 SV=1	P	GO:0051437	positive regulation of ubiquitin-protein ligase activity involved in mitotic cell cycle
C9J2P0	UB2E1_HUMANUbiquitin-conjugating enzyme E2 E1 OS=Homo sapiens GN=UBE2E1 PE=1 SV=1	P	GO:0070534	protein K63-linked ubiquitination
C9J2P0	UB2E1_HUMANUbiquitin-conjugating enzyme E2 E1 OS=Homo sapiens GN=UBE2E1 PE=1 SV=1	P	GO:0070936	protein K48-linked ubiquitination
C9J2P0	UB2E1_HUMANUbiquitin-conjugating enzyme E2 E1 OS=Homo sapiens GN=UBE2E1 PE=1 SV=1	P	GO:0070979	protein K11-linked ubiquitination
C9J2P0	UB2E1_HUMANUbiquitin-conjugating enzyme E2 E1 OS=Homo sapiens GN=UBE2E1 PE=1 SV=1	P	GO:1900087	positive regulation of G1/S transition of mitotic cell cycle
Q59H46	ITB4_HUMANIntegrin beta-4 OS=Homo sapiens GN=ITGB4 PE=1 SV=5	C	GO:0005737	cytoplasm
Q59H46	ITB4_HUMANIntegrin beta-4 OS=Homo sapiens GN=ITGB4 PE=1 SV=5	C	GO:0008305	integrin complex
Q59H46	ITB4_HUMANIntegrin beta-4 OS=Homo sapiens GN=ITGB4 PE=1 SV=5	C	GO:0009986	cell surface
Q59H46	ITB4_HUMANIntegrin beta-4 OS=Homo sapiens GN=ITGB4 PE=1 SV=5	C	GO:0030056	hemidesmosome
Q59H46	ITB4_HUMANIntegrin beta-4 OS=Homo sapiens GN=ITGB4 PE=1 SV=5	C	GO:0031252	cell leading edge
Q59H46	ITB4_HUMANIntegrin beta-4 OS=Homo sapiens GN=ITGB4 PE=1 SV=5	C	GO:0042995	cell projection
Q59H46	ITB4_HUMANIntegrin beta-4 OS=Homo sapiens GN=ITGB4 PE=1 SV=5	C	GO:0070062	extracellular vesicular exosome
Q59H46	ITB4_HUMANIntegrin beta-4 OS=Homo sapiens GN=ITGB4 PE=1 SV=5	N	GO:0098590
Q59H46	ITB4_HUMANIntegrin beta-4 OS=Homo sapiens GN=ITGB4 PE=1 SV=5	F	GO:0001664	G-protein coupled receptor binding
Q59H46	ITB4_HUMANIntegrin beta-4 OS=Homo sapiens GN=ITGB4 PE=1 SV=5	F	GO:0004872	receptor activity
Q59H46	ITB4_HUMANIntegrin beta-4 OS=Homo sapiens GN=ITGB4 PE=1 SV=5	P	GO:0002376	immune system process
Q59H46	ITB4_HUMANIntegrin beta-4 OS=Homo sapiens GN=ITGB4 PE=1 SV=5	P	GO:0006914	autophagy
Q59H46	ITB4_HUMANIntegrin beta-4 OS=Homo sapiens GN=ITGB4 PE=1 SV=5	P	GO:0007160	cell-matrix adhesion
Q59H46	ITB4_HUMANIntegrin beta-4 OS=Homo sapiens GN=ITGB4 PE=1 SV=5	P	GO:0007229	integrin-mediated signaling pathway
Q59H46	ITB4_HUMANIntegrin beta-4 OS=Homo sapiens GN=ITGB4 PE=1 SV=5	P	GO:0009611	response to wounding
Q59H46	ITB4_HUMANIntegrin beta-4 OS=Homo sapiens GN=ITGB4 PE=1 SV=5	P	GO:0016337	cell-cell adhesion
Q59H46	ITB4_HUMANIntegrin beta-4 OS=Homo sapiens GN=ITGB4 PE=1 SV=5	P	GO:0016477	cell migration
Q59H46	ITB4_HUMANIntegrin beta-4 OS=Homo sapiens GN=ITGB4 PE=1 SV=5	P	GO:0030030	cell projection organization
Q59H46	ITB4_HUMANIntegrin beta-4 OS=Homo sapiens GN=ITGB4 PE=1 SV=5	P	GO:0031581	hemidesmosome assembly
Q59H46	ITB4_HUMANIntegrin beta-4 OS=Homo sapiens GN=ITGB4 PE=1 SV=5	P	GO:0035878	nail development
Q59H46	ITB4_HUMANIntegrin beta-4 OS=Homo sapiens GN=ITGB4 PE=1 SV=5	P	GO:0043588	skin development
Q59H46	ITB4_HUMANIntegrin beta-4 OS=Homo sapiens GN=ITGB4 PE=1 SV=5	P	GO:0048333	mesodermal cell differentiation
Q59H46	ITB4_HUMANIntegrin beta-4 OS=Homo sapiens GN=ITGB4 PE=1 SV=5	P	GO:0048519	negative regulation of biological process
Q59H46	ITB4_HUMANIntegrin beta-4 OS=Homo sapiens GN=ITGB4 PE=1 SV=5	P	GO:0048522	positive regulation of cellular process
Q59H46	ITB4_HUMANIntegrin beta-4 OS=Homo sapiens GN=ITGB4 PE=1 SV=5	P	GO:0048565	digestive tract development
Q59H46	ITB4_HUMANIntegrin beta-4 OS=Homo sapiens GN=ITGB4 PE=1 SV=5	P	GO:0060255	regulation of macromolecule metabolic process
Q59H46	ITB4_HUMANIntegrin beta-4 OS=Homo sapiens GN=ITGB4 PE=1 SV=5	P	GO:0072001	renal system development
Q59H46	ITB4_HUMANIntegrin beta-4 OS=Homo sapiens GN=ITGB4 PE=1 SV=5	P	GO:0097186	amelogenesis
D3DSV0	RBPMS_HUMANRNA-binding protein with multiple splicing OS=Homo sapiens GN=RBPMS PE=1 SV=1	C	GO:0005654	nucleoplasm
D3DSV0	RBPMS_HUMANRNA-binding protein with multiple splicing OS=Homo sapiens GN=RBPMS PE=1 SV=1	C	GO:0005737	cytoplasm
D3DSV0	RBPMS_HUMANRNA-binding protein with multiple splicing OS=Homo sapiens GN=RBPMS PE=1 SV=1	F	GO:0000166	nucleotide binding
D3DSV0	RBPMS_HUMANRNA-binding protein with multiple splicing OS=Homo sapiens GN=RBPMS PE=1 SV=1	F	GO:0003713	transcription coactivator activity
D3DSV0	RBPMS_HUMANRNA-binding protein with multiple splicing OS=Homo sapiens GN=RBPMS PE=1 SV=1	F	GO:0005515	protein binding
D3DSV0	RBPMS_HUMANRNA-binding protein with multiple splicing OS=Homo sapiens GN=RBPMS PE=1 SV=1	F	GO:0008143	poly(A) RNA binding
D3DSV0	RBPMS_HUMANRNA-binding protein with multiple splicing OS=Homo sapiens GN=RBPMS PE=1 SV=1	F	GO:0017069	snRNA binding
D3DSV0	RBPMS_HUMANRNA-binding protein with multiple splicing OS=Homo sapiens GN=RBPMS PE=1 SV=1	N	GO:0044822
D3DSV0	RBPMS_HUMANRNA-binding protein with multiple splicing OS=Homo sapiens GN=RBPMS PE=1 SV=1	P	GO:0000398	mRNA splicing, via spliceosome
D3DSV0	RBPMS_HUMANRNA-binding protein with multiple splicing OS=Homo sapiens GN=RBPMS PE=1 SV=1	P	GO:0010862	positive regulation of pathway-restricted SMAD protein phosphorylation
D3DSV0	RBPMS_HUMANRNA-binding protein with multiple splicing OS=Homo sapiens GN=RBPMS PE=1 SV=1	P	GO:0060391	positive regulation of SMAD protein import into nucleus
D3DSV0	RBPMS_HUMANRNA-binding protein with multiple splicing OS=Homo sapiens GN=RBPMS PE=1 SV=1	C	GO:0005667	transcription factor complex
D3DSV0	RBPMS_HUMANRNA-binding protein with multiple splicing OS=Homo sapiens GN=RBPMS PE=1 SV=1	P	GO:0045941	positive regulation of transcription, DNA-dependent
Q9H8M2	BRD9_HUMANBromodomain-containing protein 9 OS=Homo sapiens GN=BRD9 PE=1 SV=2	C	GO:0031981	nuclear lumen
Q9H8M2	BRD9_HUMANBromodomain-containing protein 9 OS=Homo sapiens GN=BRD9 PE=1 SV=2	C	GO:0043232	intracellular non-membrane-bounded organelle
Q9H8M2	BRD9_HUMANBromodomain-containing protein 9 OS=Homo sapiens GN=BRD9 PE=1 SV=2	F	GO:0008134	transcription factor binding
Q9H8M2	BRD9_HUMANBromodomain-containing protein 9 OS=Homo sapiens GN=BRD9 PE=1 SV=2	F	GO:0044212	transcription regulatory region DNA binding
Q9H8M2	BRD9_HUMANBromodomain-containing protein 9 OS=Homo sapiens GN=BRD9 PE=1 SV=2	F	GO:0070577	histone acetyl-lysine binding
Q9H8M2	BRD9_HUMANBromodomain-containing protein 9 OS=Homo sapiens GN=BRD9 PE=1 SV=2	P	GO:0006357	regulation of transcription from RNA polymerase II promoter
Q9H8M2	BRD9_HUMANBromodomain-containing protein 9 OS=Homo sapiens GN=BRD9 PE=1 SV=2	P	GO:0007165	signal transduction
Q9H8M2	BRD9_HUMANBromodomain-containing protein 9 OS=Homo sapiens GN=BRD9 PE=1 SV=2	P	GO:0010033	response to organic substance
Q9H8M2	BRD9_HUMANBromodomain-containing protein 9 OS=Homo sapiens GN=BRD9 PE=1 SV=2	P	GO:0016573	histone acetylation
Q9H8M2	BRD9_HUMANBromodomain-containing protein 9 OS=Homo sapiens GN=BRD9 PE=1 SV=2	P	GO:0031399	regulation of protein modification process
Q9H8M2	BRD9_HUMANBromodomain-containing protein 9 OS=Homo sapiens GN=BRD9 PE=1 SV=2	P	GO:0032270	positive regulation of cellular protein metabolic process
Q9H8M2	BRD9_HUMANBromodomain-containing protein 9 OS=Homo sapiens GN=BRD9 PE=1 SV=2	P	GO:0033554	cellular response to stress
Q9H8M2	BRD9_HUMANBromodomain-containing protein 9 OS=Homo sapiens GN=BRD9 PE=1 SV=2	P	GO:0045892	negative regulation of transcription, DNA-dependent
Q9H8M2	BRD9_HUMANBromodomain-containing protein 9 OS=Homo sapiens GN=BRD9 PE=1 SV=2	P	GO:0045893	positive regulation of transcription, DNA-dependent
Q9H8M2	BRD9_HUMANBromodomain-containing protein 9 OS=Homo sapiens GN=BRD9 PE=1 SV=2	P	GO:0048731	system development
Q9H8M2	BRD9_HUMANBromodomain-containing protein 9 OS=Homo sapiens GN=BRD9 PE=1 SV=2	P	GO:0051128	regulation of cellular component organization
Q9H8M2	BRD9_HUMANBromodomain-containing protein 9 OS=Homo sapiens GN=BRD9 PE=1 SV=2	P	GO:0051726	regulation of cell cycle
Q9H8M2	BRD9_HUMANBromodomain-containing protein 9 OS=Homo sapiens GN=BRD9 PE=1 SV=2	P	GO:0070887	cellular response to chemical stimulus
Q9H8M2	BRD9_HUMANBromodomain-containing protein 9 OS=Homo sapiens GN=BRD9 PE=1 SV=2	P	GO:1901700	response to oxygen-containing compound
Q9H8M2	BRD9_HUMANBromodomain-containing protein 9 OS=Homo sapiens GN=BRD9 PE=1 SV=2	C	GO:0005667	transcription factor complex
B4DPP0	CD9_HUMANCD9 antigen OS=Homo sapiens GN=CD9 PE=1 SV=4	C	GO:0005615	extracellular space
B4DPP0	CD9_HUMANCD9 antigen OS=Homo sapiens GN=CD9 PE=1 SV=4	C	GO:0005887	integral to plasma membrane
B4DPP0	CD9_HUMANCD9 antigen OS=Homo sapiens GN=CD9 PE=1 SV=4	C	GO:0005925	focal adhesion
B4DPP0	CD9_HUMANCD9 antigen OS=Homo sapiens GN=CD9 PE=1 SV=4	C	GO:0030669	clathrin-coated endocytic vesicle membrane
B4DPP0	CD9_HUMANCD9 antigen OS=Homo sapiens GN=CD9 PE=1 SV=4	C	GO:0031092	platelet alpha granule membrane
B4DPP0	CD9_HUMANCD9 antigen OS=Homo sapiens GN=CD9 PE=1 SV=4	C	GO:0070062	extracellular vesicular exosome
B4DPP0	CD9_HUMANCD9 antigen OS=Homo sapiens GN=CD9 PE=1 SV=4	F	GO:0005515	protein binding
B4DPP0	CD9_HUMANCD9 antigen OS=Homo sapiens GN=CD9 PE=1 SV=4	P	GO:0002576	platelet degranulation
B4DPP0	CD9_HUMANCD9 antigen OS=Homo sapiens GN=CD9 PE=1 SV=4	P	GO:0006928	cellular component movement
B4DPP0	CD9_HUMANCD9 antigen OS=Homo sapiens GN=CD9 PE=1 SV=4	P	GO:0007155	cell adhesion
B4DPP0	CD9_HUMANCD9 antigen OS=Homo sapiens GN=CD9 PE=1 SV=4	P	GO:0007342	fusion of sperm to egg plasma membrane
B4DPP0	CD9_HUMANCD9 antigen OS=Homo sapiens GN=CD9 PE=1 SV=4	P	GO:0007417	central nervous system development
B4DPP0	CD9_HUMANCD9 antigen OS=Homo sapiens GN=CD9 PE=1 SV=4	P	GO:0010001	glial cell differentiation
B4DPP0	CD9_HUMANCD9 antigen OS=Homo sapiens GN=CD9 PE=1 SV=4	P	GO:0030168	platelet activation
B4DPP0	CD9_HUMANCD9 antigen OS=Homo sapiens GN=CD9 PE=1 SV=4	P	GO:0042552	myelination
B4DPP0	CD9_HUMANCD9 antigen OS=Homo sapiens GN=CD9 PE=1 SV=4	P	GO:0048468	cell development
B4DPP0	CD9_HUMANCD9 antigen OS=Homo sapiens GN=CD9 PE=1 SV=4	P	GO:0048522	positive regulation of cellular process
A0A024RC14	MAGAA_HUMANMelanoma-associated antigen 10 OS=Homo sapiens GN=MAGEA10 PE=2 SV=2	C	GO:0044424	intracellular part
B2R8A2	TMED9_HUMANTransmembrane emp24 domain-containing protein 9 OS=Homo sapiens GN=TMED9 PE=1 SV=2	C	GO:0000139	Golgi membrane
B2R8A2	TMED9_HUMANTransmembrane emp24 domain-containing protein 9 OS=Homo sapiens GN=TMED9 PE=1 SV=2	C	GO:0005783	endoplasmic reticulum
B2R8A2	TMED9_HUMANTransmembrane emp24 domain-containing protein 9 OS=Homo sapiens GN=TMED9 PE=1 SV=2	C	GO:0005793	endoplasmic reticulum-Golgi intermediate compartment
B2R8A2	TMED9_HUMANTransmembrane emp24 domain-containing protein 9 OS=Homo sapiens GN=TMED9 PE=1 SV=2	C	GO:0016021	integral to membrane
B2R8A2	TMED9_HUMANTransmembrane emp24 domain-containing protein 9 OS=Homo sapiens GN=TMED9 PE=1 SV=2	C	GO:0030140	trans-Golgi network transport vesicle
B2R8A2	TMED9_HUMANTransmembrane emp24 domain-containing protein 9 OS=Homo sapiens GN=TMED9 PE=1 SV=2	C	GO:0070062	extracellular vesicular exosome
B2R8A2	TMED9_HUMANTransmembrane emp24 domain-containing protein 9 OS=Homo sapiens GN=TMED9 PE=1 SV=2	F	GO:0004871	signal transducer activity
B2R8A2	TMED9_HUMANTransmembrane emp24 domain-containing protein 9 OS=Homo sapiens GN=TMED9 PE=1 SV=2	F	GO:0019905	syntaxin binding
B2R8A2	TMED9_HUMANTransmembrane emp24 domain-containing protein 9 OS=Homo sapiens GN=TMED9 PE=1 SV=2	P	GO:0007030	Golgi organization
B2R8A2	TMED9_HUMANTransmembrane emp24 domain-containing protein 9 OS=Homo sapiens GN=TMED9 PE=1 SV=2	P	GO:0010638	positive regulation of organelle organization
B2R8A2	TMED9_HUMANTransmembrane emp24 domain-containing protein 9 OS=Homo sapiens GN=TMED9 PE=1 SV=2	P	GO:0032527	protein exit from endoplasmic reticulum
B2R8A2	TMED9_HUMANTransmembrane emp24 domain-containing protein 9 OS=Homo sapiens GN=TMED9 PE=1 SV=2	P	GO:0034498	early endosome to Golgi transport
B2R8A2	TMED9_HUMANTransmembrane emp24 domain-containing protein 9 OS=Homo sapiens GN=TMED9 PE=1 SV=2	P	GO:0043123	positive regulation of I-kappaB kinase/NF-kappaB cascade
B2R8A2	TMED9_HUMANTransmembrane emp24 domain-containing protein 9 OS=Homo sapiens GN=TMED9 PE=1 SV=2	P	GO:0048205	COPI coating of Golgi vesicle
Q9NUU6	F105A_HUMANInactive ubiquitin thioesterase FAM105A OS=Homo sapiens GN=FAM105A PE=2 SV=1	F	GO:0016787	hydrolase activity
Q9NUU6	F105A_HUMANInactive ubiquitin thioesterase FAM105A OS=Homo sapiens GN=FAM105A PE=2 SV=1	P	GO:0044699	single-organism process
Q9NUU6	F105A_HUMANInactive ubiquitin thioesterase FAM105A OS=Homo sapiens GN=FAM105A PE=2 SV=1	P	GO:0050794	regulation of cellular process
Q9NUU6	F105A_HUMANInactive ubiquitin thioesterase FAM105A OS=Homo sapiens GN=FAM105A PE=2 SV=1	P	GO:0050896	response to stimulus
Q8IVQ8	XPO4_HUMANExportin-4 OS=Homo sapiens GN=XPO4 PE=1 SV=2	C	GO:0005654	nucleoplasm
Q8IVQ8	XPO4_HUMANExportin-4 OS=Homo sapiens GN=XPO4 PE=1 SV=2	C	GO:0005737	cytoplasm
Q8IVQ8	XPO4_HUMANExportin-4 OS=Homo sapiens GN=XPO4 PE=1 SV=2	F	GO:0005515	protein binding
Q8IVQ8	XPO4_HUMANExportin-4 OS=Homo sapiens GN=XPO4 PE=1 SV=2	P	GO:0046827	positive regulation of protein export from nucleus
P16422	EPCAM_HUMANEpithelial cell adhesion molecule OS=Homo sapiens GN=EPCAM PE=1 SV=2	C	GO:0005923	tight junction
P16422	EPCAM_HUMANEpithelial cell adhesion molecule OS=Homo sapiens GN=EPCAM PE=1 SV=2	C	GO:0016323	basolateral plasma membrane
P16422	EPCAM_HUMANEpithelial cell adhesion molecule OS=Homo sapiens GN=EPCAM PE=1 SV=2	C	GO:0016324	apical plasma membrane
P16422	EPCAM_HUMANEpithelial cell adhesion molecule OS=Homo sapiens GN=EPCAM PE=1 SV=2	C	GO:0016328	lateral plasma membrane
P16422	EPCAM_HUMANEpithelial cell adhesion molecule OS=Homo sapiens GN=EPCAM PE=1 SV=2	C	GO:0070062	extracellular vesicular exosome
P16422	EPCAM_HUMANEpithelial cell adhesion molecule OS=Homo sapiens GN=EPCAM PE=1 SV=2	F	GO:0032403	protein complex binding
P16422	EPCAM_HUMANEpithelial cell adhesion molecule OS=Homo sapiens GN=EPCAM PE=1 SV=2	P	GO:0023019	signal transduction involved in regulation of gene expression
P16422	EPCAM_HUMANEpithelial cell adhesion molecule OS=Homo sapiens GN=EPCAM PE=1 SV=2	P	GO:0045944	positive regulation of transcription from RNA polymerase II promoter
P16422	EPCAM_HUMANEpithelial cell adhesion molecule OS=Homo sapiens GN=EPCAM PE=1 SV=2	P	GO:0048863	stem cell differentiation
P16422	EPCAM_HUMANEpithelial cell adhesion molecule OS=Homo sapiens GN=EPCAM PE=1 SV=2	P	GO:2000048	negative regulation of cell-cell adhesion mediated by cadherin
P16422	EPCAM_HUMANEpithelial cell adhesion molecule OS=Homo sapiens GN=EPCAM PE=1 SV=2	P	GO:2000648	positive regulation of stem cell proliferation
B4DVJ1	DGLB_HUMANSn1-specific diacylglycerol lipase beta OS=Homo sapiens GN=DAGLB PE=1 SV=2	C	GO:0005765	lysosomal membrane
B4DVJ1	DGLB_HUMANSn1-specific diacylglycerol lipase beta OS=Homo sapiens GN=DAGLB PE=1 SV=2	C	GO:0005886	plasma membrane
B4DVJ1	DGLB_HUMANSn1-specific diacylglycerol lipase beta OS=Homo sapiens GN=DAGLB PE=1 SV=2	P	GO:0019369	arachidonic acid metabolic process
B4DVJ1	DGLB_HUMANSn1-specific diacylglycerol lipase beta OS=Homo sapiens GN=DAGLB PE=1 SV=2	P	GO:0030168	platelet activation
B7Z4U6	GELS_HUMANGelsolin OS=Homo sapiens GN=GSN PE=1 SV=1	C	GO:0002102	podosome
B7Z4U6	GELS_HUMANGelsolin OS=Homo sapiens GN=GSN PE=1 SV=1	C	GO:0005634	nucleus
B7Z4U6	GELS_HUMANGelsolin OS=Homo sapiens GN=GSN PE=1 SV=1	C	GO:0005829	cytosol
B7Z4U6	GELS_HUMANGelsolin OS=Homo sapiens GN=GSN PE=1 SV=1	C	GO:0005886	plasma membrane
B7Z4U6	GELS_HUMANGelsolin OS=Homo sapiens GN=GSN PE=1 SV=1	C	GO:0005925	focal adhesion
B7Z4U6	GELS_HUMANGelsolin OS=Homo sapiens GN=GSN PE=1 SV=1	C	GO:0016528	sarcoplasm
B7Z4U6	GELS_HUMANGelsolin OS=Homo sapiens GN=GSN PE=1 SV=1	C	GO:0030478	actin cap
B7Z4U6	GELS_HUMANGelsolin OS=Homo sapiens GN=GSN PE=1 SV=1	C	GO:0042995	cell projection
B7Z4U6	GELS_HUMANGelsolin OS=Homo sapiens GN=GSN PE=1 SV=1	C	GO:0070062	extracellular vesicular exosome
B7Z4U6	GELS_HUMANGelsolin OS=Homo sapiens GN=GSN PE=1 SV=1	C	GO:0072562	blood microparticle
B7Z4U6	GELS_HUMANGelsolin OS=Homo sapiens GN=GSN PE=1 SV=1	F	GO:0003779	actin binding
B7Z4U6	GELS_HUMANGelsolin OS=Homo sapiens GN=GSN PE=1 SV=1	F	GO:0005509	calcium ion binding
B7Z4U6	GELS_HUMANGelsolin OS=Homo sapiens GN=GSN PE=1 SV=1	F	GO:0019904	protein domain specific binding
B7Z4U6	GELS_HUMANGelsolin OS=Homo sapiens GN=GSN PE=1 SV=1	F	GO:0045159	myosin II binding
B7Z4U6	GELS_HUMANGelsolin OS=Homo sapiens GN=GSN PE=1 SV=1	P	GO:0006921	cellular component disassembly involved in execution phase of apoptosis
B7Z4U6	GELS_HUMANGelsolin OS=Homo sapiens GN=GSN PE=1 SV=1	P	GO:0010628	positive regulation of gene expression
B7Z4U6	GELS_HUMANGelsolin OS=Homo sapiens GN=GSN PE=1 SV=1	P	GO:0014891	striated muscle atrophy
B7Z4U6	GELS_HUMANGelsolin OS=Homo sapiens GN=GSN PE=1 SV=1	P	GO:0016192	vesicle-mediated transport
B7Z4U6	GELS_HUMANGelsolin OS=Homo sapiens GN=GSN PE=1 SV=1	P	GO:0022617	extracellular matrix disassembly
B7Z4U6	GELS_HUMANGelsolin OS=Homo sapiens GN=GSN PE=1 SV=1	P	GO:0031648	protein destabilization
B7Z4U6	GELS_HUMANGelsolin OS=Homo sapiens GN=GSN PE=1 SV=1	P	GO:0042221	response to chemical stimulus
B7Z4U6	GELS_HUMANGelsolin OS=Homo sapiens GN=GSN PE=1 SV=1	P	GO:0042989	sequestering of actin monomers
B7Z4U6	GELS_HUMANGelsolin OS=Homo sapiens GN=GSN PE=1 SV=1	P	GO:0044765	single-organism transport
B7Z4U6	GELS_HUMANGelsolin OS=Homo sapiens GN=GSN PE=1 SV=1	P	GO:0045595	regulation of cell differentiation
B7Z4U6	GELS_HUMANGelsolin OS=Homo sapiens GN=GSN PE=1 SV=1	P	GO:0046597	negative regulation of viral entry into host cell
B7Z4U6	GELS_HUMANGelsolin OS=Homo sapiens GN=GSN PE=1 SV=1	P	GO:0048731	system development
B7Z4U6	GELS_HUMANGelsolin OS=Homo sapiens GN=GSN PE=1 SV=1	P	GO:0051014	actin filament severing
B7Z4U6	GELS_HUMANGelsolin OS=Homo sapiens GN=GSN PE=1 SV=1	P	GO:0051016	barbed-end actin filament capping
B7Z4U6	GELS_HUMANGelsolin OS=Homo sapiens GN=GSN PE=1 SV=1	P	GO:0051094	positive regulation of developmental process
B7Z4U6	GELS_HUMANGelsolin OS=Homo sapiens GN=GSN PE=1 SV=1	P	GO:0051127	positive regulation of actin nucleation
B7Z4U6	GELS_HUMANGelsolin OS=Homo sapiens GN=GSN PE=1 SV=1	P	GO:0051240	positive regulation of multicellular organismal process
B7Z4U6	GELS_HUMANGelsolin OS=Homo sapiens GN=GSN PE=1 SV=1	P	GO:0060271	cilium morphogenesis
B7Z4U6	GELS_HUMANGelsolin OS=Homo sapiens GN=GSN PE=1 SV=1	P	GO:0071801	regulation of podosome assembly
B7Z4U6	GELS_HUMANGelsolin OS=Homo sapiens GN=GSN PE=1 SV=1	P	GO:0090527	actin filament reorganization
B7Z4U6	GELS_HUMANGelsolin OS=Homo sapiens GN=GSN PE=1 SV=1	P	GO:0097017	renal protein absorption
B7Z4U6	GELS_HUMANGelsolin OS=Homo sapiens GN=GSN PE=1 SV=1	P	GO:0097284	hepatocyte apoptotic process
B7Z4U6	GELS_HUMANGelsolin OS=Homo sapiens GN=GSN PE=1 SV=1	P	GO:1902174	positive regulation of keratinocyte apoptotic process
B7Z4U6	GELS_HUMANGelsolin OS=Homo sapiens GN=GSN PE=1 SV=1	N	GO:1903689
B7Z4U6	GELS_HUMANGelsolin OS=Homo sapiens GN=GSN PE=1 SV=1	N	GO:1903903
B7Z4U6	GELS_HUMANGelsolin OS=Homo sapiens GN=GSN PE=1 SV=1	N	GO:1903906
B7Z4U6	GELS_HUMANGelsolin OS=Homo sapiens GN=GSN PE=1 SV=1	N	GO:1903909
B7Z4U6	GELS_HUMANGelsolin OS=Homo sapiens GN=GSN PE=1 SV=1	P	GO:1990000	amyloid fibril formation
B7Z4U6	GELS_HUMANGelsolin OS=Homo sapiens GN=GSN PE=1 SV=1	P	GO:2000026	regulation of multicellular organismal development
B7Z4U6	GELS_HUMANGelsolin OS=Homo sapiens GN=GSN PE=1 SV=1	P	GO:2001269	positive regulation of cysteine-type endopeptidase activity involved in apoptotic signaling pathway
B7Z4U6	GELS_HUMANGelsolin OS=Homo sapiens GN=GSN PE=1 SV=1	C	GO:0016460	myosin II complex
A0A0D9SG53	FHL1_HUMANFour and a half LIM domains protein 1 OS=Homo sapiens GN=FHL1 PE=1 SV=4	C	GO:0005634	nucleus
A0A0D9SG53	FHL1_HUMANFour and a half LIM domains protein 1 OS=Homo sapiens GN=FHL1 PE=1 SV=4	C	GO:0005886	plasma membrane
A0A0D9SG53	FHL1_HUMANFour and a half LIM domains protein 1 OS=Homo sapiens GN=FHL1 PE=1 SV=4	C	GO:0005925	focal adhesion
A0A0D9SG53	FHL1_HUMANFour and a half LIM domains protein 1 OS=Homo sapiens GN=FHL1 PE=1 SV=4	C	GO:0043232	intracellular non-membrane-bounded organelle
A0A0D9SG53	FHL1_HUMANFour and a half LIM domains protein 1 OS=Homo sapiens GN=FHL1 PE=1 SV=4	C	GO:0044422	organelle part
A0A0D9SG53	FHL1_HUMANFour and a half LIM domains protein 1 OS=Homo sapiens GN=FHL1 PE=1 SV=4	C	GO:0044444	cytoplasmic part
A0A0D9SG53	FHL1_HUMANFour and a half LIM domains protein 1 OS=Homo sapiens GN=FHL1 PE=1 SV=4	F	GO:0008270	zinc ion binding
A0A0D9SG53	FHL1_HUMANFour and a half LIM domains protein 1 OS=Homo sapiens GN=FHL1 PE=1 SV=4	F	GO:0044325	ion channel binding
A0A0D9SG53	FHL1_HUMANFour and a half LIM domains protein 1 OS=Homo sapiens GN=FHL1 PE=1 SV=4	P	GO:0003254	regulation of membrane depolarization
A0A0D9SG53	FHL1_HUMANFour and a half LIM domains protein 1 OS=Homo sapiens GN=FHL1 PE=1 SV=4	P	GO:0006355	regulation of transcription, DNA-dependent
A0A0D9SG53	FHL1_HUMANFour and a half LIM domains protein 1 OS=Homo sapiens GN=FHL1 PE=1 SV=4	P	GO:0009887	organ morphogenesis
A0A0D9SG53	FHL1_HUMANFour and a half LIM domains protein 1 OS=Homo sapiens GN=FHL1 PE=1 SV=4	P	GO:0010972	negative regulation of G2/M transition of mitotic cell cycle
A0A0D9SG53	FHL1_HUMANFour and a half LIM domains protein 1 OS=Homo sapiens GN=FHL1 PE=1 SV=4	P	GO:0030154	cell differentiation
A0A0D9SG53	FHL1_HUMANFour and a half LIM domains protein 1 OS=Homo sapiens GN=FHL1 PE=1 SV=4	P	GO:0030308	negative regulation of cell growth
A0A0D9SG53	FHL1_HUMANFour and a half LIM domains protein 1 OS=Homo sapiens GN=FHL1 PE=1 SV=4	P	GO:0043268	positive regulation of potassium ion transport
A0A0D9SG53	FHL1_HUMANFour and a half LIM domains protein 1 OS=Homo sapiens GN=FHL1 PE=1 SV=4	P	GO:0051716	cellular response to stimulus
A0A0D9SG53	FHL1_HUMANFour and a half LIM domains protein 1 OS=Homo sapiens GN=FHL1 PE=1 SV=4	P	GO:0061061	muscle structure development
A0A0D9SG53	FHL1_HUMANFour and a half LIM domains protein 1 OS=Homo sapiens GN=FHL1 PE=1 SV=4	P	GO:1901016	regulation of potassium ion transmembrane transporter activity
A0A0D9SG53	FHL1_HUMANFour and a half LIM domains protein 1 OS=Homo sapiens GN=FHL1 PE=1 SV=4	P	GO:2000134	negative regulation of G1/S transition of mitotic cell cycle
P15144	AMPN_HUMANAminopeptidase N OS=Homo sapiens GN=ANPEP PE=1 SV=4	C	GO:0005615	extracellular space
P15144	AMPN_HUMANAminopeptidase N OS=Homo sapiens GN=ANPEP PE=1 SV=4	C	GO:0005765	lysosomal membrane
P15144	AMPN_HUMANAminopeptidase N OS=Homo sapiens GN=ANPEP PE=1 SV=4	C	GO:0005793	endoplasmic reticulum-Golgi intermediate compartment
P15144	AMPN_HUMANAminopeptidase N OS=Homo sapiens GN=ANPEP PE=1 SV=4	C	GO:0005887	integral to plasma membrane
P15144	AMPN_HUMANAminopeptidase N OS=Homo sapiens GN=ANPEP PE=1 SV=4	C	GO:0070062	extracellular vesicular exosome
P15144	AMPN_HUMANAminopeptidase N OS=Homo sapiens GN=ANPEP PE=1 SV=4	F	GO:0004177	aminopeptidase activity
P15144	AMPN_HUMANAminopeptidase N OS=Homo sapiens GN=ANPEP PE=1 SV=4	F	GO:0004872	receptor activity
P15144	AMPN_HUMANAminopeptidase N OS=Homo sapiens GN=ANPEP PE=1 SV=4	F	GO:0008235	metalloexopeptidase activity
P15144	AMPN_HUMANAminopeptidase N OS=Homo sapiens GN=ANPEP PE=1 SV=4	F	GO:0008270	zinc ion binding
P15144	AMPN_HUMANAminopeptidase N OS=Homo sapiens GN=ANPEP PE=1 SV=4	P	GO:0002003	angiotensin maturation
P15144	AMPN_HUMANAminopeptidase N OS=Homo sapiens GN=ANPEP PE=1 SV=4	P	GO:0007275	multicellular organismal development
P15144	AMPN_HUMANAminopeptidase N OS=Homo sapiens GN=ANPEP PE=1 SV=4	P	GO:0043171	peptide catabolic process
P15144	AMPN_HUMANAminopeptidase N OS=Homo sapiens GN=ANPEP PE=1 SV=4	P	GO:0044267	cellular protein metabolic process
P15144	AMPN_HUMANAminopeptidase N OS=Homo sapiens GN=ANPEP PE=1 SV=4	P	GO:0050896	response to stimulus
P15144	AMPN_HUMANAminopeptidase N OS=Homo sapiens GN=ANPEP PE=1 SV=4	P	GO:0051704	multi-organism process
P15144	AMPN_HUMANAminopeptidase N OS=Homo sapiens GN=ANPEP PE=1 SV=4	P	GO:0007165	signal transduction
A4UJ43	GSTM3_HUMANGlutathione S-transferase Mu 3 OS=Homo sapiens GN=GSTM3 PE=1 SV=3	C	GO:0005634	nucleus
A4UJ43	GSTM3_HUMANGlutathione S-transferase Mu 3 OS=Homo sapiens GN=GSTM3 PE=1 SV=3	C	GO:0005829	cytosol
A4UJ43	GSTM3_HUMANGlutathione S-transferase Mu 3 OS=Homo sapiens GN=GSTM3 PE=1 SV=3	C	GO:0070062	extracellular vesicular exosome
A4UJ43	GSTM3_HUMANGlutathione S-transferase Mu 3 OS=Homo sapiens GN=GSTM3 PE=1 SV=3	F	GO:0004364	glutathione transferase activity
A4UJ43	GSTM3_HUMANGlutathione S-transferase Mu 3 OS=Homo sapiens GN=GSTM3 PE=1 SV=3	F	GO:0019899	enzyme binding
A4UJ43	GSTM3_HUMANGlutathione S-transferase Mu 3 OS=Homo sapiens GN=GSTM3 PE=1 SV=3	F	GO:0042803	protein homodimerization activity
A4UJ43	GSTM3_HUMANGlutathione S-transferase Mu 3 OS=Homo sapiens GN=GSTM3 PE=1 SV=3	F	GO:0043295	glutathione binding
A4UJ43	GSTM3_HUMANGlutathione S-transferase Mu 3 OS=Homo sapiens GN=GSTM3 PE=1 SV=3	P	GO:0001932	regulation of protein phosphorylation
A4UJ43	GSTM3_HUMANGlutathione S-transferase Mu 3 OS=Homo sapiens GN=GSTM3 PE=1 SV=3	P	GO:0006749	glutathione metabolic process
A4UJ43	GSTM3_HUMANGlutathione S-transferase Mu 3 OS=Homo sapiens GN=GSTM3 PE=1 SV=3	P	GO:0008065	establishment of blood-nerve barrier
A4UJ43	GSTM3_HUMANGlutathione S-transferase Mu 3 OS=Homo sapiens GN=GSTM3 PE=1 SV=3	P	GO:0009892	negative regulation of metabolic process
A4UJ43	GSTM3_HUMANGlutathione S-transferase Mu 3 OS=Homo sapiens GN=GSTM3 PE=1 SV=3	P	GO:0009968	negative regulation of signal transduction
A4UJ43	GSTM3_HUMANGlutathione S-transferase Mu 3 OS=Homo sapiens GN=GSTM3 PE=1 SV=3	P	GO:0010880	regulation of release of sequestered calcium ion into cytosol by sarcoplasmic reticulum
A4UJ43	GSTM3_HUMANGlutathione S-transferase Mu 3 OS=Homo sapiens GN=GSTM3 PE=1 SV=3	P	GO:0018916	nitrobenzene metabolic process
A4UJ43	GSTM3_HUMANGlutathione S-transferase Mu 3 OS=Homo sapiens GN=GSTM3 PE=1 SV=3	P	GO:0042178	xenobiotic catabolic process
A4UJ43	GSTM3_HUMANGlutathione S-transferase Mu 3 OS=Homo sapiens GN=GSTM3 PE=1 SV=3	P	GO:0043627	response to estrogen stimulus
A4UJ43	GSTM3_HUMANGlutathione S-transferase Mu 3 OS=Homo sapiens GN=GSTM3 PE=1 SV=3	P	GO:0044092	negative regulation of molecular function
A4UJ43	GSTM3_HUMANGlutathione S-transferase Mu 3 OS=Homo sapiens GN=GSTM3 PE=1 SV=3	P	GO:0044281	small molecule metabolic process
A4UJ43	GSTM3_HUMANGlutathione S-transferase Mu 3 OS=Homo sapiens GN=GSTM3 PE=1 SV=3	P	GO:0048522	positive regulation of cellular process
A4UJ43	GSTM3_HUMANGlutathione S-transferase Mu 3 OS=Homo sapiens GN=GSTM3 PE=1 SV=3	P	GO:0051239	regulation of multicellular organismal process
A4UJ43	GSTM3_HUMANGlutathione S-transferase Mu 3 OS=Homo sapiens GN=GSTM3 PE=1 SV=3	P	GO:0060314	regulation of ryanodine-sensitive calcium-release channel activity
A4UJ43	GSTM3_HUMANGlutathione S-transferase Mu 3 OS=Homo sapiens GN=GSTM3 PE=1 SV=3	P	GO:0070458	cellular detoxification of nitrogen compound
A4UJ43	GSTM3_HUMANGlutathione S-transferase Mu 3 OS=Homo sapiens GN=GSTM3 PE=1 SV=3	P	GO:0071310	cellular response to organic substance
A4UJ43	GSTM3_HUMANGlutathione S-transferase Mu 3 OS=Homo sapiens GN=GSTM3 PE=1 SV=3	P	GO:1901687	glutathione derivative biosynthetic process
A4UJ43	GSTM3_HUMANGlutathione S-transferase Mu 3 OS=Homo sapiens GN=GSTM3 PE=1 SV=3	P	GO:0006803	glutathione conjugation reaction
Q9UJC3	HOOK1_HUMANProtein Hook homolog 1 OS=Homo sapiens GN=HOOK1 PE=1 SV=2	C	GO:0005815	microtubule organizing center
Q9UJC3	HOOK1_HUMANProtein Hook homolog 1 OS=Homo sapiens GN=HOOK1 PE=1 SV=2	C	GO:0030897	HOPS complex
Q9UJC3	HOOK1_HUMANProtein Hook homolog 1 OS=Homo sapiens GN=HOOK1 PE=1 SV=2	C	GO:0070695	FHF complex
Q9UJC3	HOOK1_HUMANProtein Hook homolog 1 OS=Homo sapiens GN=HOOK1 PE=1 SV=2	F	GO:0042802	identical protein binding
Q9UJC3	HOOK1_HUMANProtein Hook homolog 1 OS=Homo sapiens GN=HOOK1 PE=1 SV=2	P	GO:0007032	endosome organization
Q9UJC3	HOOK1_HUMANProtein Hook homolog 1 OS=Homo sapiens GN=HOOK1 PE=1 SV=2	P	GO:0007040	lysosome organization
Q9UJC3	HOOK1_HUMANProtein Hook homolog 1 OS=Homo sapiens GN=HOOK1 PE=1 SV=2	P	GO:0008333	endosome to lysosome transport
Q9UJC3	HOOK1_HUMANProtein Hook homolog 1 OS=Homo sapiens GN=HOOK1 PE=1 SV=2	P	GO:0044707	single-multicellular organism process
Q9UJC3	HOOK1_HUMANProtein Hook homolog 1 OS=Homo sapiens GN=HOOK1 PE=1 SV=2	P	GO:0044763	single-organism cellular process
Q9UJC3	HOOK1_HUMANProtein Hook homolog 1 OS=Homo sapiens GN=HOOK1 PE=1 SV=2	P	GO:0044767	single-organism developmental process
Q9UJC3	HOOK1_HUMANProtein Hook homolog 1 OS=Homo sapiens GN=HOOK1 PE=1 SV=2	P	GO:0045022	early endosome to late endosome transport
Q96B43	MAP2_HUMANMethionine aminopeptidase 2 OS=Homo sapiens GN=METAP2 PE=1 SV=1	C	GO:0005829	cytosol
Q96B43	MAP2_HUMANMethionine aminopeptidase 2 OS=Homo sapiens GN=METAP2 PE=1 SV=1	C	GO:0005886	plasma membrane
Q96B43	MAP2_HUMANMethionine aminopeptidase 2 OS=Homo sapiens GN=METAP2 PE=1 SV=1	F	GO:0004177	aminopeptidase activity
Q96B43	MAP2_HUMANMethionine aminopeptidase 2 OS=Homo sapiens GN=METAP2 PE=1 SV=1	F	GO:0008235	metalloexopeptidase activity
Q96B43	MAP2_HUMANMethionine aminopeptidase 2 OS=Homo sapiens GN=METAP2 PE=1 SV=1	N	GO:0044822
Q96B43	MAP2_HUMANMethionine aminopeptidase 2 OS=Homo sapiens GN=METAP2 PE=1 SV=1	P	GO:0016485	protein processing
Q96B43	MAP2_HUMANMethionine aminopeptidase 2 OS=Homo sapiens GN=METAP2 PE=1 SV=1	P	GO:0018206	peptidyl-methionine modification
Q96B43	MAP2_HUMANMethionine aminopeptidase 2 OS=Homo sapiens GN=METAP2 PE=1 SV=1	P	GO:0022400	regulation of rhodopsin mediated signaling pathway
Q96B43	MAP2_HUMANMethionine aminopeptidase 2 OS=Homo sapiens GN=METAP2 PE=1 SV=1	P	GO:0031365	N-terminal protein amino acid modification
P26447	S10A4_HUMANProtein S100-A4 OS=Homo sapiens GN=S100A4 PE=1 SV=1	C	GO:0005615	extracellular space
P26447	S10A4_HUMANProtein S100-A4 OS=Homo sapiens GN=S100A4 PE=1 SV=1	C	GO:0005634	nucleus
P26447	S10A4_HUMANProtein S100-A4 OS=Homo sapiens GN=S100A4 PE=1 SV=1	C	GO:0005886	plasma membrane
P26447	S10A4_HUMANProtein S100-A4 OS=Homo sapiens GN=S100A4 PE=1 SV=1	C	GO:0042995	cell projection
P26447	S10A4_HUMANProtein S100-A4 OS=Homo sapiens GN=S100A4 PE=1 SV=1	C	GO:0043232	intracellular non-membrane-bounded organelle
P26447	S10A4_HUMANProtein S100-A4 OS=Homo sapiens GN=S100A4 PE=1 SV=1	C	GO:0044422	organelle part
P26447	S10A4_HUMANProtein S100-A4 OS=Homo sapiens GN=S100A4 PE=1 SV=1	C	GO:0044425	membrane part
P26447	S10A4_HUMANProtein S100-A4 OS=Homo sapiens GN=S100A4 PE=1 SV=1	C	GO:0048471	perinuclear region of cytoplasm
P26447	S10A4_HUMANProtein S100-A4 OS=Homo sapiens GN=S100A4 PE=1 SV=1	C	GO:0070062	extracellular vesicular exosome
P26447	S10A4_HUMANProtein S100-A4 OS=Homo sapiens GN=S100A4 PE=1 SV=1	F	GO:0005509	calcium ion binding
P26447	S10A4_HUMANProtein S100-A4 OS=Homo sapiens GN=S100A4 PE=1 SV=1	F	GO:0042802	identical protein binding
P26447	S10A4_HUMANProtein S100-A4 OS=Homo sapiens GN=S100A4 PE=1 SV=1	N	GO:0044822
P26447	S10A4_HUMANProtein S100-A4 OS=Homo sapiens GN=S100A4 PE=1 SV=1	F	GO:0050786	RAGE receptor binding
P26447	S10A4_HUMANProtein S100-A4 OS=Homo sapiens GN=S100A4 PE=1 SV=1	P	GO:0001837	epithelial to mesenchymal transition
P26447	S10A4_HUMANProtein S100-A4 OS=Homo sapiens GN=S100A4 PE=1 SV=1	P	GO:0043123	positive regulation of I-kappaB kinase/NF-kappaB cascade
P26447	S10A4_HUMANProtein S100-A4 OS=Homo sapiens GN=S100A4 PE=1 SV=1	P	GO:0051179	localization
C9JSQ1	KCRU_HUMANCreatine kinase U- mitochondrial OS=Homo sapiens GN=CKMT1A PE=1 SV=1	C	GO:0005743	mitochondrial inner membrane
C9JSQ1	KCRU_HUMANCreatine kinase U- mitochondrial OS=Homo sapiens GN=CKMT1A PE=1 SV=1	C	GO:0070062	extracellular vesicular exosome
C9JSQ1	KCRU_HUMANCreatine kinase U- mitochondrial OS=Homo sapiens GN=CKMT1A PE=1 SV=1	F	GO:0004111	creatine kinase activity
C9JSQ1	KCRU_HUMANCreatine kinase U- mitochondrial OS=Homo sapiens GN=CKMT1A PE=1 SV=1	F	GO:0005488	binding
C9JSQ1	KCRU_HUMANCreatine kinase U- mitochondrial OS=Homo sapiens GN=CKMT1A PE=1 SV=1	P	GO:0006600	creatine metabolic process
C9JSQ1	KCRU_HUMANCreatine kinase U- mitochondrial OS=Homo sapiens GN=CKMT1A PE=1 SV=1	P	GO:0034641	cellular nitrogen compound metabolic process
C9JSQ1	KCRU_HUMANCreatine kinase U- mitochondrial OS=Homo sapiens GN=CKMT1A PE=1 SV=1	P	GO:0044707	single-multicellular organism process
C9JSQ1	KCRU_HUMANCreatine kinase U- mitochondrial OS=Homo sapiens GN=CKMT1A PE=1 SV=1	P	GO:0006525	arginine metabolic process
C9JSQ1	KCRU_HUMANCreatine kinase U- mitochondrial OS=Homo sapiens GN=CKMT1A PE=1 SV=1	P	GO:0006560	proline metabolic process
G3V2R9	PTGR2_HUMANProstaglandin reductase 2 OS=Homo sapiens GN=PTGR2 PE=1 SV=1	C	GO:0070062	extracellular vesicular exosome
G3V2R9	PTGR2_HUMANProstaglandin reductase 2 OS=Homo sapiens GN=PTGR2 PE=1 SV=1	F	GO:0008270	zinc ion binding
G3V2R9	PTGR2_HUMANProstaglandin reductase 2 OS=Homo sapiens GN=PTGR2 PE=1 SV=1	F	GO:0047522	15-oxoprostaglandin 13-oxidase activity
G3V2R9	PTGR2_HUMANProstaglandin reductase 2 OS=Homo sapiens GN=PTGR2 PE=1 SV=1	P	GO:0006693	prostaglandin metabolic process
G3V2R9	PTGR2_HUMANProstaglandin reductase 2 OS=Homo sapiens GN=PTGR2 PE=1 SV=1	P	GO:0055114	oxidation-reduction process
B8ZZZ1	AP1S3_HUMANAP-1 complex subunit sigma-3 OS=Homo sapiens GN=AP1S3 PE=1 SV=1	C	GO:0000139	Golgi membrane
B8ZZZ1	AP1S3_HUMANAP-1 complex subunit sigma-3 OS=Homo sapiens GN=AP1S3 PE=1 SV=1	C	GO:0030125	clathrin vesicle coat
B8ZZZ1	AP1S3_HUMANAP-1 complex subunit sigma-3 OS=Homo sapiens GN=AP1S3 PE=1 SV=1	C	GO:0030131	clathrin adaptor complex
B8ZZZ1	AP1S3_HUMANAP-1 complex subunit sigma-3 OS=Homo sapiens GN=AP1S3 PE=1 SV=1	C	GO:0030133	transport vesicle
B8ZZZ1	AP1S3_HUMANAP-1 complex subunit sigma-3 OS=Homo sapiens GN=AP1S3 PE=1 SV=1	C	GO:0030669	clathrin-coated endocytic vesicle membrane
B8ZZZ1	AP1S3_HUMANAP-1 complex subunit sigma-3 OS=Homo sapiens GN=AP1S3 PE=1 SV=1	C	GO:0070062	extracellular vesicular exosome
B8ZZZ1	AP1S3_HUMANAP-1 complex subunit sigma-3 OS=Homo sapiens GN=AP1S3 PE=1 SV=1	F	GO:0005515	protein binding
B8ZZZ1	AP1S3_HUMANAP-1 complex subunit sigma-3 OS=Homo sapiens GN=AP1S3 PE=1 SV=1	F	GO:0008565	protein transporter activity
B8ZZZ1	AP1S3_HUMANAP-1 complex subunit sigma-3 OS=Homo sapiens GN=AP1S3 PE=1 SV=1	P	GO:0006605	protein targeting
B8ZZZ1	AP1S3_HUMANAP-1 complex subunit sigma-3 OS=Homo sapiens GN=AP1S3 PE=1 SV=1	P	GO:0006898	receptor-mediated endocytosis
B8ZZZ1	AP1S3_HUMANAP-1 complex subunit sigma-3 OS=Homo sapiens GN=AP1S3 PE=1 SV=1	P	GO:0009615	response to virus
B8ZZZ1	AP1S3_HUMANAP-1 complex subunit sigma-3 OS=Homo sapiens GN=AP1S3 PE=1 SV=1	P	GO:0048583	regulation of response to stimulus
B8ZZZ1	AP1S3_HUMANAP-1 complex subunit sigma-3 OS=Homo sapiens GN=AP1S3 PE=1 SV=1	P	GO:0061024	membrane organization
B4E200	PPIC_HUMANPeptidyl-prolyl cis-trans isomerase C OS=Homo sapiens GN=PPIC PE=1 SV=1	C	GO:0005783	endoplasmic reticulum
B4E200	PPIC_HUMANPeptidyl-prolyl cis-trans isomerase C OS=Homo sapiens GN=PPIC PE=1 SV=1	C	GO:0032991	macromolecular complex
B4E200	PPIC_HUMANPeptidyl-prolyl cis-trans isomerase C OS=Homo sapiens GN=PPIC PE=1 SV=1	C	GO:0044428	nuclear part
B4E200	PPIC_HUMANPeptidyl-prolyl cis-trans isomerase C OS=Homo sapiens GN=PPIC PE=1 SV=1	C	GO:0070013	intracellular organelle lumen
B4E200	PPIC_HUMANPeptidyl-prolyl cis-trans isomerase C OS=Homo sapiens GN=PPIC PE=1 SV=1	C	GO:0070062	extracellular vesicular exosome
B4E200	PPIC_HUMANPeptidyl-prolyl cis-trans isomerase C OS=Homo sapiens GN=PPIC PE=1 SV=1	F	GO:0003755	peptidyl-prolyl cis-trans isomerase activity
B4E200	PPIC_HUMANPeptidyl-prolyl cis-trans isomerase C OS=Homo sapiens GN=PPIC PE=1 SV=1	F	GO:0005515	protein binding
B4E200	PPIC_HUMANPeptidyl-prolyl cis-trans isomerase C OS=Homo sapiens GN=PPIC PE=1 SV=1	F	GO:0016018	cyclosporin A binding
B4E200	PPIC_HUMANPeptidyl-prolyl cis-trans isomerase C OS=Homo sapiens GN=PPIC PE=1 SV=1	P	GO:0000413	protein peptidyl-prolyl isomerization
B4E200	PPIC_HUMANPeptidyl-prolyl cis-trans isomerase C OS=Homo sapiens GN=PPIC PE=1 SV=1	P	GO:0006457	protein folding
B4E200	PPIC_HUMANPeptidyl-prolyl cis-trans isomerase C OS=Homo sapiens GN=PPIC PE=1 SV=1	P	GO:0031323	regulation of cellular metabolic process
B4E200	PPIC_HUMANPeptidyl-prolyl cis-trans isomerase C OS=Homo sapiens GN=PPIC PE=1 SV=1	P	GO:0044699	single-organism process
B4E200	PPIC_HUMANPeptidyl-prolyl cis-trans isomerase C OS=Homo sapiens GN=PPIC PE=1 SV=1	P	GO:0044794	positive regulation by host of viral process
B4E200	PPIC_HUMANPeptidyl-prolyl cis-trans isomerase C OS=Homo sapiens GN=PPIC PE=1 SV=1	P	GO:0045070	positive regulation of viral genome replication
B4E200	PPIC_HUMANPeptidyl-prolyl cis-trans isomerase C OS=Homo sapiens GN=PPIC PE=1 SV=1	P	GO:0060255	regulation of macromolecule metabolic process
B4E200	PPIC_HUMANPeptidyl-prolyl cis-trans isomerase C OS=Homo sapiens GN=PPIC PE=1 SV=1	P	GO:0080090	regulation of primary metabolic process
Q05DN2	IFIT2_HUMANInterferon-induced protein with tetratricopeptide repeats 2 OS=Homo sapiens GN=IFIT2 PE=1 SV=1	C	GO:0005783	endoplasmic reticulum
Q05DN2	IFIT2_HUMANInterferon-induced protein with tetratricopeptide repeats 2 OS=Homo sapiens GN=IFIT2 PE=1 SV=1	C	GO:0005829	cytosol
Q05DN2	IFIT2_HUMANInterferon-induced protein with tetratricopeptide repeats 2 OS=Homo sapiens GN=IFIT2 PE=1 SV=1	F	GO:0005515	protein binding
Q05DN2	IFIT2_HUMANInterferon-induced protein with tetratricopeptide repeats 2 OS=Homo sapiens GN=IFIT2 PE=1 SV=1	N	GO:0044822
Q05DN2	IFIT2_HUMANInterferon-induced protein with tetratricopeptide repeats 2 OS=Homo sapiens GN=IFIT2 PE=1 SV=1	P	GO:0008637	apoptotic mitochondrial changes
Q05DN2	IFIT2_HUMANInterferon-induced protein with tetratricopeptide repeats 2 OS=Homo sapiens GN=IFIT2 PE=1 SV=1	P	GO:0009615	response to virus
Q05DN2	IFIT2_HUMANInterferon-induced protein with tetratricopeptide repeats 2 OS=Homo sapiens GN=IFIT2 PE=1 SV=1	P	GO:0032091	negative regulation of protein binding
Q05DN2	IFIT2_HUMANInterferon-induced protein with tetratricopeptide repeats 2 OS=Homo sapiens GN=IFIT2 PE=1 SV=1	P	GO:0035457	cellular response to interferon-alpha
Q05DN2	IFIT2_HUMANInterferon-induced protein with tetratricopeptide repeats 2 OS=Homo sapiens GN=IFIT2 PE=1 SV=1	P	GO:0043065	positive regulation of apoptotic process
Q05DN2	IFIT2_HUMANInterferon-induced protein with tetratricopeptide repeats 2 OS=Homo sapiens GN=IFIT2 PE=1 SV=1	P	GO:0048519	negative regulation of biological process
Q05DN2	IFIT2_HUMANInterferon-induced protein with tetratricopeptide repeats 2 OS=Homo sapiens GN=IFIT2 PE=1 SV=1	P	GO:0060337	type I interferon-mediated signaling pathway
A0A024RC76	ISG20_HUMANInterferon-stimulated gene 20 kDa protein OS=Homo sapiens GN=ISG20 PE=1 SV=2	C	GO:0005730	nucleolus
A0A024RC76	ISG20_HUMANInterferon-stimulated gene 20 kDa protein OS=Homo sapiens GN=ISG20 PE=1 SV=2	C	GO:0005737	cytoplasm
A0A024RC76	ISG20_HUMANInterferon-stimulated gene 20 kDa protein OS=Homo sapiens GN=ISG20 PE=1 SV=2	C	GO:0015030	Cajal body
A0A024RC76	ISG20_HUMANInterferon-stimulated gene 20 kDa protein OS=Homo sapiens GN=ISG20 PE=1 SV=2	C	GO:0016605	PML body
A0A024RC76	ISG20_HUMANInterferon-stimulated gene 20 kDa protein OS=Homo sapiens GN=ISG20 PE=1 SV=2	F	GO:0000175	3'-5'-exoribonuclease activity
A0A024RC76	ISG20_HUMANInterferon-stimulated gene 20 kDa protein OS=Homo sapiens GN=ISG20 PE=1 SV=2	F	GO:0008310	single-stranded DNA 3'-5' exodeoxyribonuclease activity
A0A024RC76	ISG20_HUMANInterferon-stimulated gene 20 kDa protein OS=Homo sapiens GN=ISG20 PE=1 SV=2	F	GO:0030619	U1 snRNA binding
A0A024RC76	ISG20_HUMANInterferon-stimulated gene 20 kDa protein OS=Homo sapiens GN=ISG20 PE=1 SV=2	F	GO:0030620	U2 snRNA binding
A0A024RC76	ISG20_HUMANInterferon-stimulated gene 20 kDa protein OS=Homo sapiens GN=ISG20 PE=1 SV=2	F	GO:0034511	U3 snoRNA binding
A0A024RC76	ISG20_HUMANInterferon-stimulated gene 20 kDa protein OS=Homo sapiens GN=ISG20 PE=1 SV=2	P	GO:0000738	DNA catabolic process, exonucleolytic
A0A024RC76	ISG20_HUMANInterferon-stimulated gene 20 kDa protein OS=Homo sapiens GN=ISG20 PE=1 SV=2	P	GO:0006401	RNA catabolic process
A0A024RC76	ISG20_HUMANInterferon-stimulated gene 20 kDa protein OS=Homo sapiens GN=ISG20 PE=1 SV=2	P	GO:0008283	cell proliferation
A0A024RC76	ISG20_HUMANInterferon-stimulated gene 20 kDa protein OS=Homo sapiens GN=ISG20 PE=1 SV=2	P	GO:0045071	negative regulation of viral genome replication
A0A024RC76	ISG20_HUMANInterferon-stimulated gene 20 kDa protein OS=Homo sapiens GN=ISG20 PE=1 SV=2	P	GO:0051607	defense response to virus
A0A024RC76	ISG20_HUMANInterferon-stimulated gene 20 kDa protein OS=Homo sapiens GN=ISG20 PE=1 SV=2	P	GO:0060337	type I interferon-mediated signaling pathway
A0A024RC76	ISG20_HUMANInterferon-stimulated gene 20 kDa protein OS=Homo sapiens GN=ISG20 PE=1 SV=2	P	GO:0090503	RNA phosphodiester bond hydrolysis, exonucleolytic
A0A024RC76	ISG20_HUMANInterferon-stimulated gene 20 kDa protein OS=Homo sapiens GN=ISG20 PE=1 SV=2	P	GO:0051252	regulation of RNA metabolic process
A0A087X0Q6	SP8_HUMANTranscription factor Sp8 OS=Homo sapiens GN=SP8 PE=2 SV=3	C	GO:0005654	nucleoplasm
A0A087X0Q6	SP8_HUMANTranscription factor Sp8 OS=Homo sapiens GN=SP8 PE=2 SV=3	C	GO:0044444	cytoplasmic part
A0A087X0Q6	SP8_HUMANTranscription factor Sp8 OS=Homo sapiens GN=SP8 PE=2 SV=3	F	GO:0000977	RNA polymerase II regulatory region sequence-specific DNA binding
A0A087X0Q6	SP8_HUMANTranscription factor Sp8 OS=Homo sapiens GN=SP8 PE=2 SV=3	F	GO:0003700	sequence-specific DNA binding transcription factor activity
A0A087X0Q6	SP8_HUMANTranscription factor Sp8 OS=Homo sapiens GN=SP8 PE=2 SV=3	F	GO:0008134	transcription factor binding
A0A087X0Q6	SP8_HUMANTranscription factor Sp8 OS=Homo sapiens GN=SP8 PE=2 SV=3	F	GO:0019899	enzyme binding
A0A087X0Q6	SP8_HUMANTranscription factor Sp8 OS=Homo sapiens GN=SP8 PE=2 SV=3	F	GO:0046872	metal ion binding
A0A087X0Q6	SP8_HUMANTranscription factor Sp8 OS=Homo sapiens GN=SP8 PE=2 SV=3	P	GO:0006357	regulation of transcription from RNA polymerase II promoter
A0A087X0Q6	SP8_HUMANTranscription factor Sp8 OS=Homo sapiens GN=SP8 PE=2 SV=3	P	GO:0009790	embryo development
A0A087X0Q6	SP8_HUMANTranscription factor Sp8 OS=Homo sapiens GN=SP8 PE=2 SV=3	P	GO:0030097	hemopoiesis
A0A087X0Q6	SP8_HUMANTranscription factor Sp8 OS=Homo sapiens GN=SP8 PE=2 SV=3	P	GO:0030154	cell differentiation
A0A087X0Q6	SP8_HUMANTranscription factor Sp8 OS=Homo sapiens GN=SP8 PE=2 SV=3	P	GO:0045892	negative regulation of transcription, DNA-dependent
A0A087X0Q6	SP8_HUMANTranscription factor Sp8 OS=Homo sapiens GN=SP8 PE=2 SV=3	P	GO:0045893	positive regulation of transcription, DNA-dependent
A0A087X0Q6	SP8_HUMANTranscription factor Sp8 OS=Homo sapiens GN=SP8 PE=2 SV=3	P	GO:0051704	multi-organism process
A0A087X0Q6	SP8_HUMANTranscription factor Sp8 OS=Homo sapiens GN=SP8 PE=2 SV=3	P	GO:0065008	regulation of biological quality
A0A087X0Q6	SP8_HUMANTranscription factor Sp8 OS=Homo sapiens GN=SP8 PE=2 SV=3	C	GO:0005667	transcription factor complex
A0A087X0Q6	SP8_HUMANTranscription factor Sp8 OS=Homo sapiens GN=SP8 PE=2 SV=3	P	GO:0045449	regulation of transcription, DNA-dependent
P05204	HMGN2_HUMANNon-histone chromosomal protein HMG-17 OS=Homo sapiens GN=HMGN2 PE=1 SV=3	C	GO:0000785	chromatin
P05204	HMGN2_HUMANNon-histone chromosomal protein HMG-17 OS=Homo sapiens GN=HMGN2 PE=1 SV=3	C	GO:0005634	nucleus
P05204	HMGN2_HUMANNon-histone chromosomal protein HMG-17 OS=Homo sapiens GN=HMGN2 PE=1 SV=3	F	GO:0031492	nucleosomal DNA binding
P05204	HMGN2_HUMANNon-histone chromosomal protein HMG-17 OS=Homo sapiens GN=HMGN2 PE=1 SV=3	N	GO:0044822
Q7Z443	PK1L3_HUMANPolycystic kidney disease protein 1-like 3 OS=Homo sapiens GN=PKD1L3 PE=1 SV=1	C	GO:0005886	plasma membrane
Q7Z443	PK1L3_HUMANPolycystic kidney disease protein 1-like 3 OS=Homo sapiens GN=PKD1L3 PE=1 SV=1	C	GO:0034703	cation channel complex
Q7Z443	PK1L3_HUMANPolycystic kidney disease protein 1-like 3 OS=Homo sapiens GN=PKD1L3 PE=1 SV=1	C	GO:0042995	cell projection
Q7Z443	PK1L3_HUMANPolycystic kidney disease protein 1-like 3 OS=Homo sapiens GN=PKD1L3 PE=1 SV=1	C	GO:0043231	intracellular membrane-bounded organelle
Q7Z443	PK1L3_HUMANPolycystic kidney disease protein 1-like 3 OS=Homo sapiens GN=PKD1L3 PE=1 SV=1	C	GO:0044422	organelle part
Q7Z443	PK1L3_HUMANPolycystic kidney disease protein 1-like 3 OS=Homo sapiens GN=PKD1L3 PE=1 SV=1	C	GO:0044444	cytoplasmic part
Q7Z443	PK1L3_HUMANPolycystic kidney disease protein 1-like 3 OS=Homo sapiens GN=PKD1L3 PE=1 SV=1	C	GO:0070062	extracellular vesicular exosome
Q7Z443	PK1L3_HUMANPolycystic kidney disease protein 1-like 3 OS=Homo sapiens GN=PKD1L3 PE=1 SV=1	F	GO:0005261	cation channel activity
Q7Z443	PK1L3_HUMANPolycystic kidney disease protein 1-like 3 OS=Homo sapiens GN=PKD1L3 PE=1 SV=1	F	GO:0005515	protein binding
Q7Z443	PK1L3_HUMANPolycystic kidney disease protein 1-like 3 OS=Homo sapiens GN=PKD1L3 PE=1 SV=1	F	GO:0046873	metal ion transmembrane transporter activity
Q7Z443	PK1L3_HUMANPolycystic kidney disease protein 1-like 3 OS=Homo sapiens GN=PKD1L3 PE=1 SV=1	P	GO:0001656	metanephros development
Q7Z443	PK1L3_HUMANPolycystic kidney disease protein 1-like 3 OS=Homo sapiens GN=PKD1L3 PE=1 SV=1	P	GO:0009653	anatomical structure morphogenesis
Q7Z443	PK1L3_HUMANPolycystic kidney disease protein 1-like 3 OS=Homo sapiens GN=PKD1L3 PE=1 SV=1	P	GO:0030001	metal ion transport
Q7Z443	PK1L3_HUMANPolycystic kidney disease protein 1-like 3 OS=Homo sapiens GN=PKD1L3 PE=1 SV=1	P	GO:0035295	tube development
Q7Z443	PK1L3_HUMANPolycystic kidney disease protein 1-like 3 OS=Homo sapiens GN=PKD1L3 PE=1 SV=1	P	GO:0042221	response to chemical stimulus
Q7Z443	PK1L3_HUMANPolycystic kidney disease protein 1-like 3 OS=Homo sapiens GN=PKD1L3 PE=1 SV=1	P	GO:0050794	regulation of cellular process
Q7Z443	PK1L3_HUMANPolycystic kidney disease protein 1-like 3 OS=Homo sapiens GN=PKD1L3 PE=1 SV=1	P	GO:0050915	sensory perception of sour taste
Q7Z443	PK1L3_HUMANPolycystic kidney disease protein 1-like 3 OS=Homo sapiens GN=PKD1L3 PE=1 SV=1	P	GO:0051606	detection of stimulus
Q7Z443	PK1L3_HUMANPolycystic kidney disease protein 1-like 3 OS=Homo sapiens GN=PKD1L3 PE=1 SV=1	P	GO:0060429	epithelium development
Q7Z443	PK1L3_HUMANPolycystic kidney disease protein 1-like 3 OS=Homo sapiens GN=PKD1L3 PE=1 SV=1	P	GO:0071214	cellular response to abiotic stimulus
Q7Z443	PK1L3_HUMANPolycystic kidney disease protein 1-like 3 OS=Homo sapiens GN=PKD1L3 PE=1 SV=1	N	GO:0098655
A0A087WXU6	TF2LY_HUMANHomeobox protein TGIF2LY OS=Homo sapiens GN=TGIF2LY PE=2 SV=1	C	GO:0043229	intracellular organelle
A0A087WXU6	TF2LY_HUMANHomeobox protein TGIF2LY OS=Homo sapiens GN=TGIF2LY PE=2 SV=1	F	GO:0000981	sequence-specific DNA binding RNA polymerase II transcription factor activity
A0A087WXU6	TF2LY_HUMANHomeobox protein TGIF2LY OS=Homo sapiens GN=TGIF2LY PE=2 SV=1	F	GO:0003677	DNA binding
A0A087WXU6	TF2LY_HUMANHomeobox protein TGIF2LY OS=Homo sapiens GN=TGIF2LY PE=2 SV=1	F	GO:0005515	protein binding
A0A087WXU6	TF2LY_HUMANHomeobox protein TGIF2LY OS=Homo sapiens GN=TGIF2LY PE=2 SV=1	P	GO:0006355	regulation of transcription, DNA-dependent
A0A087WXU6	TF2LY_HUMANHomeobox protein TGIF2LY OS=Homo sapiens GN=TGIF2LY PE=2 SV=1	P	GO:0048522	positive regulation of cellular process
A0A087WXU6	TF2LY_HUMANHomeobox protein TGIF2LY OS=Homo sapiens GN=TGIF2LY PE=2 SV=1	P	GO:0048523	negative regulation of cellular process
A0A087WXU6	TF2LY_HUMANHomeobox protein TGIF2LY OS=Homo sapiens GN=TGIF2LY PE=2 SV=1	P	GO:0048731	system development
A0A087WXU6	TF2LY_HUMANHomeobox protein TGIF2LY OS=Homo sapiens GN=TGIF2LY PE=2 SV=1	P	GO:0050896	response to stimulus
P43355	MAGA1_HUMANMelanoma-associated antigen 1 OS=Homo sapiens GN=MAGEA1 PE=1 SV=1	C	GO:0005737	cytoplasm
P43355	MAGA1_HUMANMelanoma-associated antigen 1 OS=Homo sapiens GN=MAGEA1 PE=1 SV=1	C	GO:0005886	plasma membrane
P43355	MAGA1_HUMANMelanoma-associated antigen 1 OS=Homo sapiens GN=MAGEA1 PE=1 SV=1	F	GO:0042826	histone deacetylase binding
P43355	MAGA1_HUMANMelanoma-associated antigen 1 OS=Homo sapiens GN=MAGEA1 PE=1 SV=1	P	GO:0000122	negative regulation of transcription from RNA polymerase II promoter
P43355	MAGA1_HUMANMelanoma-associated antigen 1 OS=Homo sapiens GN=MAGEA1 PE=1 SV=1	P	GO:0031399	regulation of protein modification process
P43355	MAGA1_HUMANMelanoma-associated antigen 1 OS=Homo sapiens GN=MAGEA1 PE=1 SV=1	P	GO:0032269	negative regulation of cellular protein metabolic process
P43355	MAGA1_HUMANMelanoma-associated antigen 1 OS=Homo sapiens GN=MAGEA1 PE=1 SV=1	P	GO:0045746	negative regulation of Notch signaling pathway
P43355	MAGA1_HUMANMelanoma-associated antigen 1 OS=Homo sapiens GN=MAGEA1 PE=1 SV=1	C	GO:0000118	histone deacetylase complex
Q9HBR0	S38AA_HUMAN sodium-coupled neutral amino acid transporter 10 OS=Homo sapiens GN=SLC38A10 PE=1 SV=2	C	GO:0005794	Golgi apparatus
Q9HBR0	S38AA_HUMAN sodium-coupled neutral amino acid transporter 10 OS=Homo sapiens GN=SLC38A10 PE=1 SV=2	C	GO:0016020	membrane
Q9HBR0	S38AA_HUMAN sodium-coupled neutral amino acid transporter 10 OS=Homo sapiens GN=SLC38A10 PE=1 SV=2	F	GO:0015179	L-amino acid transmembrane transporter activity
Q9HBR0	S38AA_HUMAN sodium-coupled neutral amino acid transporter 10 OS=Homo sapiens GN=SLC38A10 PE=1 SV=2	P	GO:0003333	amino acid transmembrane transport
Q9HBR0	S38AA_HUMAN sodium-coupled neutral amino acid transporter 10 OS=Homo sapiens GN=SLC38A10 PE=1 SV=2	P	GO:0006812	cation transport
Q9HBR0	S38AA_HUMAN sodium-coupled neutral amino acid transporter 10 OS=Homo sapiens GN=SLC38A10 PE=1 SV=2	P	GO:0015807	L-amino acid transport
Q9NWM3	CUED1_HUMANCUE domain-containing protein 1 OS=Homo sapiens GN=CUEDC1 PE=1 SV=1	F	GO:0005515	protein binding
H0Y6D8	TBP_HUMANTATA-box-binding protein OS=Homo sapiens GN=TBP PE=1 SV=2	C	GO:0005669	transcription factor TFIID complex
H0Y6D8	TBP_HUMANTATA-box-binding protein OS=Homo sapiens GN=TBP PE=1 SV=2	C	GO:0005672	transcription factor TFIIA complex
H0Y6D8	TBP_HUMANTATA-box-binding protein OS=Homo sapiens GN=TBP PE=1 SV=2	C	GO:0005719	nuclear euchromatin
H0Y6D8	TBP_HUMANTATA-box-binding protein OS=Homo sapiens GN=TBP PE=1 SV=2	C	GO:0005737	cytoplasm
H0Y6D8	TBP_HUMANTATA-box-binding protein OS=Homo sapiens GN=TBP PE=1 SV=2	F	GO:0019899	enzyme binding
H0Y6D8	TBP_HUMANTATA-box-binding protein OS=Homo sapiens GN=TBP PE=1 SV=2	F	GO:0044212	transcription regulatory region DNA binding
H0Y6D8	TBP_HUMANTATA-box-binding protein OS=Homo sapiens GN=TBP PE=1 SV=2	F	GO:0070491	repressing transcription factor binding
H0Y6D8	TBP_HUMANTATA-box-binding protein OS=Homo sapiens GN=TBP PE=1 SV=2	P	GO:0006352	DNA-dependent transcription, initiation
H0Y6D8	TBP_HUMANTATA-box-binding protein OS=Homo sapiens GN=TBP PE=1 SV=2	P	GO:0006355	regulation of transcription, DNA-dependent
H0Y6D8	TBP_HUMANTATA-box-binding protein OS=Homo sapiens GN=TBP PE=1 SV=2	P	GO:0006360	transcription from RNA polymerase I promoter
H0Y6D8	TBP_HUMANTATA-box-binding protein OS=Homo sapiens GN=TBP PE=1 SV=2	P	GO:0006366	transcription from RNA polymerase II promoter
H0Y6D8	TBP_HUMANTATA-box-binding protein OS=Homo sapiens GN=TBP PE=1 SV=2	P	GO:0006383	transcription from RNA polymerase III promoter
H0Y6D8	TBP_HUMANTATA-box-binding protein OS=Homo sapiens GN=TBP PE=1 SV=2	P	GO:0010629	negative regulation of gene expression
H0Y6D8	TBP_HUMANTATA-box-binding protein OS=Homo sapiens GN=TBP PE=1 SV=2	P	GO:0040029	regulation of gene expression, epigenetic
H0Y6D8	TBP_HUMANTATA-box-binding protein OS=Homo sapiens GN=TBP PE=1 SV=2	P	GO:0044763	single-organism cellular process
H0Y6D8	TBP_HUMANTATA-box-binding protein OS=Homo sapiens GN=TBP PE=1 SV=2	P	GO:0051704	multi-organism process
P25815	S100P_HUMANProtein S100-P OS=Homo sapiens GN=S100P PE=1 SV=2	C	GO:0005634	nucleus
P25815	S100P_HUMANProtein S100-P OS=Homo sapiens GN=S100P PE=1 SV=2	C	GO:0016020	membrane
P25815	S100P_HUMANProtein S100-P OS=Homo sapiens GN=S100P PE=1 SV=2	C	GO:0042995	cell projection
P25815	S100P_HUMANProtein S100-P OS=Homo sapiens GN=S100P PE=1 SV=2	C	GO:0044444	cytoplasmic part
P25815	S100P_HUMANProtein S100-P OS=Homo sapiens GN=S100P PE=1 SV=2	C	GO:0070062	extracellular vesicular exosome
P25815	S100P_HUMANProtein S100-P OS=Homo sapiens GN=S100P PE=1 SV=2	F	GO:0000287	magnesium ion binding
P25815	S100P_HUMANProtein S100-P OS=Homo sapiens GN=S100P PE=1 SV=2	F	GO:0005509	calcium ion binding
P25815	S100P_HUMANProtein S100-P OS=Homo sapiens GN=S100P PE=1 SV=2	F	GO:0048306	calcium-dependent protein binding
P25815	S100P_HUMANProtein S100-P OS=Homo sapiens GN=S100P PE=1 SV=2	F	GO:0050786	RAGE receptor binding
P25815	S100P_HUMANProtein S100-P OS=Homo sapiens GN=S100P PE=1 SV=2	P	GO:0002376	immune system process
P25815	S100P_HUMANProtein S100-P OS=Homo sapiens GN=S100P PE=1 SV=2	P	GO:0006952	defense response
P25815	S100P_HUMANProtein S100-P OS=Homo sapiens GN=S100P PE=1 SV=2	P	GO:0007417	central nervous system development
P25815	S100P_HUMANProtein S100-P OS=Homo sapiens GN=S100P PE=1 SV=2	P	GO:0009605	response to external stimulus
P25815	S100P_HUMANProtein S100-P OS=Homo sapiens GN=S100P PE=1 SV=2	P	GO:0010033	response to organic substance
P25815	S100P_HUMANProtein S100-P OS=Homo sapiens GN=S100P PE=1 SV=2	P	GO:0010647	positive regulation of cell communication
P25815	S100P_HUMANProtein S100-P OS=Homo sapiens GN=S100P PE=1 SV=2	P	GO:0023056	positive regulation of signaling
P25815	S100P_HUMANProtein S100-P OS=Homo sapiens GN=S100P PE=1 SV=2	P	GO:0031323	regulation of cellular metabolic process
P25815	S100P_HUMANProtein S100-P OS=Homo sapiens GN=S100P PE=1 SV=2	P	GO:0043542	endothelial cell migration
P25815	S100P_HUMANProtein S100-P OS=Homo sapiens GN=S100P PE=1 SV=2	P	GO:0044093	positive regulation of molecular function
P25815	S100P_HUMANProtein S100-P OS=Homo sapiens GN=S100P PE=1 SV=2	P	GO:0048584	positive regulation of response to stimulus
P25815	S100P_HUMANProtein S100-P OS=Homo sapiens GN=S100P PE=1 SV=2	P	GO:0051128	regulation of cellular component organization
P25815	S100P_HUMANProtein S100-P OS=Homo sapiens GN=S100P PE=1 SV=2	P	GO:0060255	regulation of macromolecule metabolic process
P25815	S100P_HUMANProtein S100-P OS=Homo sapiens GN=S100P PE=1 SV=2	P	GO:0080090	regulation of primary metabolic process
P25815	S100P_HUMANProtein S100-P OS=Homo sapiens GN=S100P PE=1 SV=2	P	GO:0007165	signal transduction
H0YGX7	GDIR2_HUMANRho GDP-dissociation inhibitor 2 OS=Homo sapiens GN=ARHGDIB PE=1 SV=3	C	GO:0005829	cytosol
H0YGX7	GDIR2_HUMANRho GDP-dissociation inhibitor 2 OS=Homo sapiens GN=ARHGDIB PE=1 SV=3	C	GO:0005856	cytoskeleton
H0YGX7	GDIR2_HUMANRho GDP-dissociation inhibitor 2 OS=Homo sapiens GN=ARHGDIB PE=1 SV=3	C	GO:0016023	cytoplasmic membrane-bounded vesicle
H0YGX7	GDIR2_HUMANRho GDP-dissociation inhibitor 2 OS=Homo sapiens GN=ARHGDIB PE=1 SV=3	C	GO:0070062	extracellular vesicular exosome
H0YGX7	GDIR2_HUMANRho GDP-dissociation inhibitor 2 OS=Homo sapiens GN=ARHGDIB PE=1 SV=3	F	GO:0003924	GTPase activity
H0YGX7	GDIR2_HUMANRho GDP-dissociation inhibitor 2 OS=Homo sapiens GN=ARHGDIB PE=1 SV=3	F	GO:0005094	Rho GDP-dissociation inhibitor activity
H0YGX7	GDIR2_HUMANRho GDP-dissociation inhibitor 2 OS=Homo sapiens GN=ARHGDIB PE=1 SV=3	P	GO:0006955	immune response
H0YGX7	GDIR2_HUMANRho GDP-dissociation inhibitor 2 OS=Homo sapiens GN=ARHGDIB PE=1 SV=3	P	GO:0007162	negative regulation of cell adhesion
H0YGX7	GDIR2_HUMANRho GDP-dissociation inhibitor 2 OS=Homo sapiens GN=ARHGDIB PE=1 SV=3	P	GO:0007266	Rho protein signal transduction
H0YGX7	GDIR2_HUMANRho GDP-dissociation inhibitor 2 OS=Homo sapiens GN=ARHGDIB PE=1 SV=3	P	GO:0030036	actin cytoskeleton organization
H0YGX7	GDIR2_HUMANRho GDP-dissociation inhibitor 2 OS=Homo sapiens GN=ARHGDIB PE=1 SV=3	P	GO:0050770	regulation of axonogenesis
H0YGX7	GDIR2_HUMANRho GDP-dissociation inhibitor 2 OS=Homo sapiens GN=ARHGDIB PE=1 SV=3	P	GO:0050790	regulation of catalytic activity
H0YGX7	GDIR2_HUMANRho GDP-dissociation inhibitor 2 OS=Homo sapiens GN=ARHGDIB PE=1 SV=3	P	GO:0051056	regulation of small GTPase mediated signal transduction
H0YGX7	GDIR2_HUMANRho GDP-dissociation inhibitor 2 OS=Homo sapiens GN=ARHGDIB PE=1 SV=3	P	GO:1901164	negative regulation of trophoblast cell migration
D6RA82	ANXA3_HUMANAnnexin A3 OS=Homo sapiens GN=ANXA3 PE=1 SV=3	C	GO:0005634	nucleus
D6RA82	ANXA3_HUMANAnnexin A3 OS=Homo sapiens GN=ANXA3 PE=1 SV=3	C	GO:0005768	endosome
D6RA82	ANXA3_HUMANAnnexin A3 OS=Homo sapiens GN=ANXA3 PE=1 SV=3	C	GO:0005886	plasma membrane
D6RA82	ANXA3_HUMANAnnexin A3 OS=Homo sapiens GN=ANXA3 PE=1 SV=3	C	GO:0030670	phagocytic vesicle membrane
D6RA82	ANXA3_HUMANAnnexin A3 OS=Homo sapiens GN=ANXA3 PE=1 SV=3	C	GO:0042581	specific granule
D6RA82	ANXA3_HUMANAnnexin A3 OS=Homo sapiens GN=ANXA3 PE=1 SV=3	C	GO:0042995	cell projection
D6RA82	ANXA3_HUMANAnnexin A3 OS=Homo sapiens GN=ANXA3 PE=1 SV=3	C	GO:0043232	intracellular non-membrane-bounded organelle
D6RA82	ANXA3_HUMANAnnexin A3 OS=Homo sapiens GN=ANXA3 PE=1 SV=3	C	GO:0044425	membrane part
D6RA82	ANXA3_HUMANAnnexin A3 OS=Homo sapiens GN=ANXA3 PE=1 SV=3	C	GO:0070062	extracellular vesicular exosome
D6RA82	ANXA3_HUMANAnnexin A3 OS=Homo sapiens GN=ANXA3 PE=1 SV=3	F	GO:0003676	nucleic acid binding
D6RA82	ANXA3_HUMANAnnexin A3 OS=Homo sapiens GN=ANXA3 PE=1 SV=3	F	GO:0004859	phospholipase inhibitor activity
D6RA82	ANXA3_HUMANAnnexin A3 OS=Homo sapiens GN=ANXA3 PE=1 SV=3	F	GO:0005509	calcium ion binding
D6RA82	ANXA3_HUMANAnnexin A3 OS=Homo sapiens GN=ANXA3 PE=1 SV=3	F	GO:0005544	calcium-dependent phospholipid binding
D6RA82	ANXA3_HUMANAnnexin A3 OS=Homo sapiens GN=ANXA3 PE=1 SV=3	F	GO:0048306	calcium-dependent protein binding
D6RA82	ANXA3_HUMANAnnexin A3 OS=Homo sapiens GN=ANXA3 PE=1 SV=3	P	GO:0006909	phagocytosis
D6RA82	ANXA3_HUMANAnnexin A3 OS=Homo sapiens GN=ANXA3 PE=1 SV=3	P	GO:0007154	cell communication
D6RA82	ANXA3_HUMANAnnexin A3 OS=Homo sapiens GN=ANXA3 PE=1 SV=3	P	GO:0009888	tissue development
D6RA82	ANXA3_HUMANAnnexin A3 OS=Homo sapiens GN=ANXA3 PE=1 SV=3	P	GO:0010595	positive regulation of endothelial cell migration
D6RA82	ANXA3_HUMANAnnexin A3 OS=Homo sapiens GN=ANXA3 PE=1 SV=3	P	GO:0010605	negative regulation of macromolecule metabolic process
D6RA82	ANXA3_HUMANAnnexin A3 OS=Homo sapiens GN=ANXA3 PE=1 SV=3	P	GO:0016043	cellular component organization
D6RA82	ANXA3_HUMANAnnexin A3 OS=Homo sapiens GN=ANXA3 PE=1 SV=3	P	GO:0030154	cell differentiation
D6RA82	ANXA3_HUMANAnnexin A3 OS=Homo sapiens GN=ANXA3 PE=1 SV=3	P	GO:0042592	homeostatic process
D6RA82	ANXA3_HUMANAnnexin A3 OS=Homo sapiens GN=ANXA3 PE=1 SV=3	P	GO:0042742	defense response to bacterium
D6RA82	ANXA3_HUMANAnnexin A3 OS=Homo sapiens GN=ANXA3 PE=1 SV=3	P	GO:0043312	neutrophil degranulation
D6RA82	ANXA3_HUMANAnnexin A3 OS=Homo sapiens GN=ANXA3 PE=1 SV=3	P	GO:0044092	negative regulation of molecular function
D6RA82	ANXA3_HUMANAnnexin A3 OS=Homo sapiens GN=ANXA3 PE=1 SV=3	P	GO:0044700	single organism signaling
D6RA82	ANXA3_HUMANAnnexin A3 OS=Homo sapiens GN=ANXA3 PE=1 SV=3	P	GO:0045766	positive regulation of angiogenesis
D6RA82	ANXA3_HUMANAnnexin A3 OS=Homo sapiens GN=ANXA3 PE=1 SV=3	P	GO:0048513	organ development
D6RA82	ANXA3_HUMANAnnexin A3 OS=Homo sapiens GN=ANXA3 PE=1 SV=3	P	GO:0048523	negative regulation of cellular process
D6RA82	ANXA3_HUMANAnnexin A3 OS=Homo sapiens GN=ANXA3 PE=1 SV=3	P	GO:0048545	response to steroid hormone stimulus
D6RA82	ANXA3_HUMANAnnexin A3 OS=Homo sapiens GN=ANXA3 PE=1 SV=3	P	GO:0051049	regulation of transport
D6RA82	ANXA3_HUMANAnnexin A3 OS=Homo sapiens GN=ANXA3 PE=1 SV=3	P	GO:0051091	positive regulation of sequence-specific DNA binding transcription factor activity
D6RA82	ANXA3_HUMANAnnexin A3 OS=Homo sapiens GN=ANXA3 PE=1 SV=3	P	GO:0051241	negative regulation of multicellular organismal process
D6RA82	ANXA3_HUMANAnnexin A3 OS=Homo sapiens GN=ANXA3 PE=1 SV=3	P	GO:0051716	cellular response to stimulus
B7ZL93	GP107_HUMANProtein GPR107 OS=Homo sapiens GN=GPR107 PE=1 SV=1	C	GO:0016021	integral to membrane
Q96DZ4	MMP1_HUMANInterstitial collagenase OS=Homo sapiens GN=MMP1 PE=1 SV=3	C	GO:0016020	membrane
Q96DZ4	MMP1_HUMANInterstitial collagenase OS=Homo sapiens GN=MMP1 PE=1 SV=3	C	GO:0043231	intracellular membrane-bounded organelle
Q96DZ4	MMP1_HUMANInterstitial collagenase OS=Homo sapiens GN=MMP1 PE=1 SV=3	C	GO:0044421	extracellular region part
Q96DZ4	MMP1_HUMANInterstitial collagenase OS=Homo sapiens GN=MMP1 PE=1 SV=3	C	GO:0044444	cytoplasmic part
Q96DZ4	MMP1_HUMANInterstitial collagenase OS=Homo sapiens GN=MMP1 PE=1 SV=3	F	GO:0004222	metalloendopeptidase activity
Q96DZ4	MMP1_HUMANInterstitial collagenase OS=Homo sapiens GN=MMP1 PE=1 SV=3	F	GO:0005515	protein binding
Q96DZ4	MMP1_HUMANInterstitial collagenase OS=Homo sapiens GN=MMP1 PE=1 SV=3	F	GO:0008270	zinc ion binding
Q96DZ4	MMP1_HUMANInterstitial collagenase OS=Homo sapiens GN=MMP1 PE=1 SV=3	P	GO:0001501	skeletal system development
Q96DZ4	MMP1_HUMANInterstitial collagenase OS=Homo sapiens GN=MMP1 PE=1 SV=3	P	GO:0006508	proteolysis
Q96DZ4	MMP1_HUMANInterstitial collagenase OS=Homo sapiens GN=MMP1 PE=1 SV=3	P	GO:0007596	blood coagulation
Q96DZ4	MMP1_HUMANInterstitial collagenase OS=Homo sapiens GN=MMP1 PE=1 SV=3	P	GO:0009887	organ morphogenesis
Q96DZ4	MMP1_HUMANInterstitial collagenase OS=Homo sapiens GN=MMP1 PE=1 SV=3	P	GO:0009888	tissue development
Q96DZ4	MMP1_HUMANInterstitial collagenase OS=Homo sapiens GN=MMP1 PE=1 SV=3	P	GO:0022617	extracellular matrix disassembly
Q96DZ4	MMP1_HUMANInterstitial collagenase OS=Homo sapiens GN=MMP1 PE=1 SV=3	P	GO:0030574	collagen catabolic process
Q96DZ4	MMP1_HUMANInterstitial collagenase OS=Homo sapiens GN=MMP1 PE=1 SV=3	P	GO:0032461	positive regulation of protein oligomerization
Q96DZ4	MMP1_HUMANInterstitial collagenase OS=Homo sapiens GN=MMP1 PE=1 SV=3	P	GO:0042221	response to chemical stimulus
Q96DZ4	MMP1_HUMANInterstitial collagenase OS=Homo sapiens GN=MMP1 PE=1 SV=3	P	GO:0044267	cellular protein metabolic process
Q96DZ4	MMP1_HUMANInterstitial collagenase OS=Homo sapiens GN=MMP1 PE=1 SV=3	P	GO:0048646	anatomical structure formation involved in morphogenesis
Q96DZ4	MMP1_HUMANInterstitial collagenase OS=Homo sapiens GN=MMP1 PE=1 SV=3	P	GO:0050900	leukocyte migration
Q9H617	TM164_HUMANTransmembrane protein 164 OS=Homo sapiens GN=TMEM164 PE=2 SV=1	C	GO:0016020	membrane
B4DLV6	SNIP1_HUMANSmad nuclear-interacting protein 1 OS=Homo sapiens GN=SNIP1 PE=1 SV=1	C	GO:0005654	nucleoplasm
B4DLV6	SNIP1_HUMANSmad nuclear-interacting protein 1 OS=Homo sapiens GN=SNIP1 PE=1 SV=1	C	GO:0005737	cytoplasm
B4DLV6	SNIP1_HUMANSmad nuclear-interacting protein 1 OS=Homo sapiens GN=SNIP1 PE=1 SV=1	F	GO:0005515	protein binding
B4DLV6	SNIP1_HUMANSmad nuclear-interacting protein 1 OS=Homo sapiens GN=SNIP1 PE=1 SV=1	N	GO:0044822
B4DLV6	SNIP1_HUMANSmad nuclear-interacting protein 1 OS=Homo sapiens GN=SNIP1 PE=1 SV=1	P	GO:0035196	production of miRNAs involved in gene silencing by miRNA
B4DLV6	SNIP1_HUMANSmad nuclear-interacting protein 1 OS=Homo sapiens GN=SNIP1 PE=1 SV=1	N	GO:1903955
Q8NFR3	SPTSB_HUMANSerine palmitoyltransferase small subunit B OS=Homo sapiens GN=SPTSSB PE=1 SV=1	C	GO:0017059	serine C-palmitoyltransferase complex
Q8NFR3	SPTSB_HUMANSerine palmitoyltransferase small subunit B OS=Homo sapiens GN=SPTSSB PE=1 SV=1	F	GO:0004758	serine C-palmitoyltransferase activity
Q8NFR3	SPTSB_HUMANSerine palmitoyltransferase small subunit B OS=Homo sapiens GN=SPTSSB PE=1 SV=1	F	GO:0005515	protein binding
Q8NFR3	SPTSB_HUMANSerine palmitoyltransferase small subunit B OS=Homo sapiens GN=SPTSSB PE=1 SV=1	P	GO:0030148	sphingolipid biosynthetic process
Q8NFR3	SPTSB_HUMANSerine palmitoyltransferase small subunit B OS=Homo sapiens GN=SPTSSB PE=1 SV=1	P	GO:0006687	glycosphingolipid metabolic process
Q8NFR3	SPTSB_HUMANSerine palmitoyltransferase small subunit B OS=Homo sapiens GN=SPTSSB PE=1 SV=1	P	GO:0042967	acyl-carrier-protein biosynthetic process

## Sheet: BP
Level	GO ID	Term	Type	#Seqs	Sequences
2	GO:0065007	biological regulation	biological_process	43	A0A0D9SG53, B7Z4U6, A4UJ43, E9PJK1, P16422, D3DSV0, B4E200, P25815, A0A024RC76, Q9H8M2, A0A087X0Q6, D6RA82, Q96B43, B4DU58, H0YGX7, C9J2P0, B2R8A2, Q99536, B4DPP0, B4DVJ1, P15144, H0Y6D8, P43355, B3KUB6, A0A024RDE8, B8ZZZ1, B4DH89, O15247, Q96DZ4, Q59H46, P05787, Q9NUU6, Q7Z443, Q8IVQ8, B2RA03, P08727, Q06787, A0A087WXU6, Q05DN2, P37059, P55795, P26447, B4DLV6
2	GO:0044699	single-organism process	biological_process	47	B4DH89, C9J406, A4UJ43, A0A0D9SG53, B7Z4U6, B2R8A2, B4DPP0, P25815, P05787, Q96DZ4, Q9H8M2, A0A087WXU6, O15247, Q59H46, Q7Z443, D6RA82, P07205, Q96B43, B2RA03, P08727, H0YGX7, C9J2P0, Q99536, P16422, B4DVJ1, A0A087X0Q6, P15144, Q06787, B4DU58, Q9UJC3, H0Y6D8, Q05DN2, A0A024RDE8, E9PJK1, B8ZZZ1, A0A024RC76, D3DSV0, Q9NUU6, B4E200, B3KUB6, Q8IVQ8, P43355, P37059, C9JSQ1, Q9HBR0, P26447, B4DLV6
2	GO:0071840	cellular component organization or biogenesis	biological_process	23	C9J406, A0A0D9SG53, B7Z4U6, P05787, B4DPP0, B2RA03, P08727, C9J2P0, B2R8A2, Q99536, Q9H8M2, Q59H46, B3KUB6, P25815, H0YGX7, B4DU58, Q96DZ4, Q05DN2, B8ZZZ1, D6RA82, A0A024RDE8, Q9UJC3, P26447
2	GO:0022610	biological adhesion	biological_process	5	P16422, E9PJK1, H0YGX7, Q59H46, B4DPP0
2	GO:0040007	growth	biological_process	1	A0A0D9SG53
2	GO:0040011	locomotion	biological_process	8	B7Z4U6, H0YGX7, D6RA82, Q96DZ4, Q59H46, P25815, E9PJK1, P08727
2	GO:0008152	metabolic process	biological_process	35	B4DH89, C9J2P0, A4UJ43, G3V2R9, E9PJK1, P16422, D3DSV0, B4E200, P25815, A0A024RC76, Q8NFR3, Q9H8M2, A0A087X0Q6, O15247, Q99536, Q96DZ4, B7Z4U6, P15144, H0Y6D8, B4DVJ1, P43355, D6RA82, C9JSQ1, Q2TU64, H0YGX7, P37059, Q96B43, P07205, Q06787, Q59H46, A0A024RDE8, P55795, B4DLV6, A0A0D9SG53, A0A087WXU6
2	GO:0023052	signaling	biological_process	24	P25815, Q96B43, P16422, H0YGX7, E9PJK1, D3DSV0, Q59H46, B4DPP0, P43355, O15247, B3KUB6, D6RA82, A0A024RDE8, B2RA03, P08727, Q9H8M2, P15144, Q05DN2, A0A024RC76, C9J2P0, B2R8A2, P26447, B7Z4U6, A4UJ43
2	GO:0051179	localization	biological_process	24	B2R8A2, B2RA03, P26447, B7Z4U6, H0YGX7, D6RA82, Q96DZ4, Q9UJC3, B8ZZZ1, A0A0D9SG53, D3DSV0, E9PJK1, Q8IVQ8, Q59H46, O15247, A4UJ43, Q9HBR0, B4DPP0, P25815, Q7Z443, B4DU58, B3KUB6, Q2TU64, P08727
2	GO:0002376	immune system process	biological_process	10	Q59H46, P25815, A0A024RC76, Q96DZ4, D6RA82, E9PJK1, A0A087X0Q6, H0YGX7, Q05DN2, C9J2P0
2	GO:0051704	multi-organism process	biological_process	11	P15144, A0A087X0Q6, H0Y6D8, B7Z4U6, D6RA82, B4E200, A0A024RC76, H0YGX7, E9PJK1, B8ZZZ1, Q05DN2
2	GO:0000003	reproduction	biological_process	2	B4DPP0, H0YGX7
2	GO:0032501	multicellular organismal process	biological_process	29	B4DH89, A4UJ43, B4DPP0, P25815, A0A0D9SG53, Q96DZ4, Q9H8M2, B7Z4U6, A0A087WXU6, O15247, Q59H46, D6RA82, H0YGX7, B4DVJ1, A0A087X0Q6, P15144, P05787, Q06787, Q7Z443, P08727, A0A024RDE8, B2RA03, E9PJK1, P37059, B4DU58, Q9UJC3, C9JSQ1, B3KUB6, P26447
2	GO:0032502	developmental process	biological_process	29	B4DH89, A4UJ43, B4DPP0, P25815, A0A024RDE8, B3KUB6, D6RA82, Q96DZ4, A0A0D9SG53, Q9H8M2, B7Z4U6, A0A087WXU6, O15247, Q59H46, H0YGX7, Q99536, A0A087X0Q6, P05787, Q06787, P15144, B2RA03, B4DU58, Q9UJC3, Q7Z443, P07205, P08727, E9PJK1, P16422, P26447
2	GO:0050896	response to stimulus	biological_process	35	B4DH89, D6RA82, Q7Z443, Q9H8M2, Q96B43, B7Z4U6, B4DU58, Q9NUU6, P15144, A0A087WXU6, A0A024RC76, P16422, B4DPP0, B4DVJ1, A4UJ43, H0YGX7, Q05DN2, O15247, C9J2P0, P25815, B8ZZZ1, E9PJK1, B2RA03, Q96DZ4, D3DSV0, P05787, P08727, Q59H46, P43355, A0A024RDE8, P37059, B2R8A2, P26447, B4DLV6, A0A0D9SG53
2	GO:0009987	cellular process	biological_process	51	C9J406, A4UJ43, A0A0D9SG53, B7Z4U6, B4DH89, C9J2P0, B2R8A2, G3V2R9, P05787, E9PJK1, P16422, D3DSV0, A0A024RC76, Q8NFR3, B4E200, P25815, O15247, Q59H46, Q7Z443, Q9H8M2, A0A087X0Q6, Q96B43, B4DPP0, B2RA03, P08727, H0YGX7, Q99536, B4DVJ1, D6RA82, Q06787, Q9UJC3, H0Y6D8, P43355, Q05DN2, Q96DZ4, B8ZZZ1, C9JSQ1, Q2TU64, Q9NUU6, B3KUB6, P07205, Q8IVQ8, Q9HBR0, P15144, A0A024RDE8, B4DU58, A0A087WXU6, P37…
3	GO:0032504	multicellular organism reproduction	biological_process	1	B4DPP0
3	GO:0009719	response to endogenous stimulus	biological_process	3	D6RA82, P08727, A4UJ43
3	GO:0019953	sexual reproduction	biological_process	1	B4DPP0
3	GO:0033036	macromolecule localization	biological_process	8	B2RA03, B8ZZZ1, B7Z4U6, D3DSV0, E9PJK1, Q8IVQ8, B2R8A2, B3KUB6
3	GO:0044763	single-organism cellular process	biological_process	42	C9J406, A4UJ43, A0A0D9SG53, B7Z4U6, B2R8A2, P05787, O15247, Q59H46, Q7Z443, Q9H8M2, Q96B43, B2RA03, P08727, P25815, H0YGX7, C9J2P0, Q99536, P16422, B4DPP0, B4DVJ1, D6RA82, A0A087X0Q6, Q06787, Q9UJC3, H0Y6D8, Q05DN2, Q96DZ4, E9PJK1, B8ZZZ1, D3DSV0, B3KUB6, P07205, Q8IVQ8, P43355, Q9HBR0, A0A024RDE8, P15144, B4DU58, B4DH89, A0A024RC76, P26447, B4DLV6
3	GO:0044706	multi-multicellular organism process	biological_process	1	H0YGX7
3	GO:0065009	regulation of molecular function	biological_process	11	B3KUB6, E9PJK1, O15247, D6RA82, H0YGX7, C9J2P0, A0A0D9SG53, Q05DN2, A4UJ43, B7Z4U6, P25815
3	GO:0006950	response to stress	biological_process	14	D6RA82, A0A024RC76, B4DPP0, B4DVJ1, A4UJ43, O15247, C9J2P0, P25815, P05787, P08727, Q96DZ4, Q05DN2, Q9H8M2, Q59H46
3	GO:0044419	interspecies interaction between organisms	biological_process	4	B7Z4U6, B4E200, A0A024RC76, E9PJK1
3	GO:0016265	death	biological_process	4	B7Z4U6, Q05DN2, B2RA03, B4DU58
3	GO:0009605	response to external stimulus	biological_process	2	Q96B43, P25815
3	GO:0044764	multi-organism cellular process	biological_process	4	B7Z4U6, A0A024RC76, B4E200, E9PJK1
3	GO:0009628	response to abiotic stimulus	biological_process	2	Q7Z443, Q96B43
3	GO:0042221	response to chemical stimulus	biological_process	15	B4DH89, Q9H8M2, A4UJ43, Q05DN2, B2RA03, B7Z4U6, Q7Z443, Q96DZ4, D6RA82, P08727, A0A024RC76, P37059, C9J2P0, P25815, B4DLV6
3	GO:0071704	organic substance metabolic process	biological_process	33	B4DH89, C9J2P0, G3V2R9, E9PJK1, P16422, D3DSV0, A0A024RC76, Q8NFR3, Q9H8M2, A0A087X0Q6, Q96DZ4, B7Z4U6, Q99536, P15144, H0Y6D8, B4DVJ1, P43355, D6RA82, C9JSQ1, Q2TU64, Q96B43, P07205, Q06787, P37059, B4E200, A4UJ43, P55795, Q59H46, P25815, B4DLV6, A0A0D9SG53, A0A087WXU6, O15247
3	GO:0044710	single-organism metabolic process	biological_process	11	B4DH89, G3V2R9, Q8NFR3, O15247, Q99536, Q96DZ4, B4DVJ1, C9JSQ1, P37059, A4UJ43, E9PJK1
3	GO:0008283	cell proliferation	biological_process	4	E9PJK1, B4DH89, A0A024RC76, P16422
3	GO:0044237	cellular metabolic process	biological_process	32	B4DH89, C9J2P0, G3V2R9, E9PJK1, P16422, D3DSV0, A0A024RC76, Q8NFR3, B4E200, P25815, Q9H8M2, A0A087X0Q6, A4UJ43, Q99536, B4DVJ1, P43355, C9JSQ1, D6RA82, Q2TU64, P07205, P15144, Q96DZ4, Q06787, Q59H46, Q96B43, P37059, P55795, H0Y6D8, B4DLV6, A0A0D9SG53, A0A087WXU6, O15247
3	GO:0044707	single-multicellular organism process	biological_process	29	B4DH89, A4UJ43, B4DPP0, P25815, A0A0D9SG53, Q96DZ4, Q9H8M2, B7Z4U6, A0A087WXU6, O15247, Q59H46, D6RA82, H0YGX7, B4DVJ1, A0A087X0Q6, P15144, P05787, Q06787, Q7Z443, P08727, A0A024RDE8, B2RA03, E9PJK1, P37059, B4DU58, Q9UJC3, C9JSQ1, B3KUB6, P26447
3	GO:0002252	immune effector process	biological_process	2	A0A024RC76, D6RA82
3	GO:0050789	regulation of biological process	biological_process	41	A0A0D9SG53, B7Z4U6, A4UJ43, E9PJK1, P16422, D3DSV0, B4E200, P25815, A0A024RC76, Q9H8M2, A0A087X0Q6, D6RA82, Q96B43, B4DU58, H0YGX7, C9J2P0, B2R8A2, Q99536, P15144, H0Y6D8, P43355, A0A024RDE8, B8ZZZ1, B4DH89, B3KUB6, Q59H46, P05787, Q9NUU6, Q7Z443, Q8IVQ8, O15247, B2RA03, P08727, Q06787, A0A087WXU6, B4DPP0, Q05DN2, Q96DZ4, P55795, P26447, B4DLV6
3	GO:0051606	detection of stimulus	biological_process	2	Q96B43, Q7Z443
3	GO:0009607	response to biotic stimulus	biological_process	4	D6RA82, A0A024RC76, B8ZZZ1, Q05DN2
3	GO:0015976	carbon utilization	biological_process	1	P07205
3	GO:0051234	establishment of localization	biological_process	15	B2R8A2, B2RA03, B7Z4U6, Q9UJC3, D6RA82, B8ZZZ1, A0A0D9SG53, D3DSV0, Q8IVQ8, O15247, A4UJ43, Q9HBR0, B4DPP0, Q7Z443, Q2TU64
3	GO:0044085	cellular component biogenesis	biological_process	7	P08727, Q59H46, B7Z4U6, B4DU58, P05787, B2RA03, Q96DZ4
3	GO:0044767	single-organism developmental process	biological_process	17	B4DH89, A4UJ43, A0A0D9SG53, Q96DZ4, Q59H46, A0A087X0Q6, B4DU58, Q9UJC3, Q7Z443, D6RA82, A0A024RDE8, P08727, H0YGX7, B3KUB6, B4DPP0, B7Z4U6, P26447
3	GO:0009056	catabolic process	biological_process	7	A0A024RC76, Q96DZ4, B4DH89, A4UJ43, P07205, Q59H46, P15144
3	GO:0016043	cellular component organization	biological_process	23	C9J406, A0A0D9SG53, B7Z4U6, P05787, B4DPP0, B2RA03, P08727, C9J2P0, B2R8A2, Q99536, Q9H8M2, Q59H46, B3KUB6, P25815, H0YGX7, B4DU58, Q96DZ4, Q05DN2, B8ZZZ1, D6RA82, A0A024RDE8, Q9UJC3, P26447
3	GO:0044700	single organism signaling	biological_process	24	P25815, Q96B43, P16422, H0YGX7, E9PJK1, D3DSV0, Q59H46, B4DPP0, P43355, O15247, B3KUB6, D6RA82, A0A024RDE8, B2RA03, P08727, Q9H8M2, P15144, Q05DN2, A0A024RC76, C9J2P0, B2R8A2, P26447, B7Z4U6, A4UJ43
3	GO:0048856	anatomical structure development	biological_process	24	B4DH89, A4UJ43, B4DPP0, P25815, A0A024RDE8, B3KUB6, D6RA82, Q96DZ4, A0A0D9SG53, Q9H8M2, B7Z4U6, A0A087WXU6, O15247, Q59H46, Q99536, A0A087X0Q6, Q7Z443, P05787, B2RA03, P07205, P08727, H0YGX7, B4DU58, P26447
3	GO:0006807	nitrogen compound metabolic process	biological_process	20	B4DH89, E9PJK1, P16422, D3DSV0, A0A024RC76, Q8NFR3, Q9H8M2, A0A087X0Q6, C9J2P0, A4UJ43, C9JSQ1, D6RA82, P43355, P15144, P55795, H0Y6D8, B4DLV6, A0A0D9SG53, A0A087WXU6, O15247
3	GO:0051674	localization of cell	biological_process	6	H0YGX7, D6RA82, Q96DZ4, Q59H46, P25815, P08727
3	GO:0065008	regulation of biological quality	biological_process	15	B4E200, B7Z4U6, E9PJK1, B4DPP0, B4DVJ1, P15144, A0A087X0Q6, D6RA82, Q96DZ4, B4DH89, O15247, A4UJ43, P37059, A0A0D9SG53, B4DU58
3	GO:0044238	primary metabolic process	biological_process	32	B4DH89, C9J2P0, G3V2R9, E9PJK1, P16422, D3DSV0, B4E200, P25815, A0A024RC76, Q8NFR3, Q9H8M2, A0A087X0Q6, Q99536, P15144, B4DVJ1, P43355, C9JSQ1, D6RA82, Q2TU64, Q96B43, P07205, Q96DZ4, Q06787, P37059, A4UJ43, P55795, H0Y6D8, B4DLV6, A0A0D9SG53, A0A087WXU6, B7Z4U6, O15247
3	GO:0006955	immune response	biological_process	6	D6RA82, H0YGX7, E9PJK1, Q05DN2, A0A024RC76, C9J2P0
3	GO:0009058	biosynthetic process	biological_process	18	B4DH89, E9PJK1, P16422, D3DSV0, Q9H8M2, A0A087X0Q6, Q99536, Q8NFR3, D6RA82, P07205, Q06787, P43355, P37059, H0Y6D8, A4UJ43, C9J2P0, A0A0D9SG53, A0A087WXU6
3	GO:0022414	reproductive process	biological_process	2	B4DPP0, H0YGX7
3	GO:0048610	cellular process involved in reproduction	biological_process	2	B4DPP0, H0YGX7
4	GO:0051235	maintenance of location	biological_process	3	B7Z4U6, O15247, A4UJ43
4	GO:0042391	regulation of membrane potential	biological_process	2	B4DPP0, A0A0D9SG53
4	GO:0061024	membrane organization	biological_process	6	C9J406, B4DPP0, B2RA03, Q99536, B2R8A2, B8ZZZ1
4	GO:0043900	regulation of multi-organism process	biological_process	4	B7Z4U6, A0A024RC76, B4E200, H0YGX7
4	GO:0001775	cell activation	biological_process	4	B4DPP0, B4DVJ1, D6RA82, E9PJK1
4	GO:0044248	cellular catabolic process	biological_process	5	A0A024RC76, B4DH89, A4UJ43, Q59H46, P15144
4	GO:0070271	protein complex biogenesis	biological_process	3	B7Z4U6, B4DU58, Q96DZ4
4	GO:0090130	tissue migration	biological_process	2	D6RA82, P25815
4	GO:0042303	molting cycle	biological_process	1	P08727
4	GO:0051128	regulation of cellular component organization	biological_process	12	A0A0D9SG53, C9J2P0, B2R8A2, Q99536, B7Z4U6, B3KUB6, Q9H8M2, P25815, H0YGX7, B4DU58, Q96DZ4, A0A024RDE8
4	GO:0008104	protein localization	biological_process	8	B2RA03, B8ZZZ1, B7Z4U6, D3DSV0, E9PJK1, Q8IVQ8, B2R8A2, B3KUB6
4	GO:0051716	cellular response to stimulus	biological_process	27	Q7Z443, Q9H8M2, Q96B43, P16422, A4UJ43, H0YGX7, Q05DN2, C9J2P0, E9PJK1, D3DSV0, Q59H46, P43355, O15247, A0A024RDE8, B2RA03, P08727, P15144, P25815, B4DH89, A0A024RC76, B2R8A2, P26447, B7Z4U6, B4DLV6, P05787, A0A0D9SG53, D6RA82
4	GO:0043062	extracellular structure organization	biological_process	3	B4DU58, B7Z4U6, Q96DZ4
4	GO:0006979	response to oxidative stress	biological_process	1	O15247
4	GO:0016049	cell growth	biological_process	1	A0A0D9SG53
4	GO:0044403	symbiosis, encompassing mutualism through parasitism	biological_process	4	B7Z4U6, B4E200, A0A024RC76, E9PJK1
4	GO:0043170	macromolecule metabolic process	biological_process	26	C9J2P0, E9PJK1, P16422, D3DSV0, A0A024RC76, Q9H8M2, A0A087X0Q6, Q96DZ4, B7Z4U6, P15144, H0Y6D8, P43355, D6RA82, Q2TU64, Q99536, Q8NFR3, Q96B43, Q06787, B4E200, A4UJ43, P55795, Q59H46, P25815, B4DLV6, A0A0D9SG53, A0A087WXU6
4	GO:0044281	small molecule metabolic process	biological_process	8	B4DH89, G3V2R9, Q99536, B4DVJ1, C9JSQ1, P37059, A4UJ43, O15247
4	GO:0046483	heterocycle metabolic process	biological_process	16	E9PJK1, P16422, D3DSV0, A0A024RC76, Q9H8M2, A0A087X0Q6, C9J2P0, B4DH89, C9JSQ1, D6RA82, P43355, P55795, H0Y6D8, B4DLV6, A0A0D9SG53, A0A087WXU6
4	GO:0034641	cellular nitrogen compound metabolic process	biological_process	19	E9PJK1, P16422, D3DSV0, A0A024RC76, Q9H8M2, A0A087X0Q6, C9J2P0, A4UJ43, B4DH89, D6RA82, P43355, P15144, C9JSQ1, P55795, H0Y6D8, B4DLV6, A0A0D9SG53, A0A087WXU6, O15247
4	GO:0048869	cellular developmental process	biological_process	18	A4UJ43, O15247, Q59H46, P05787, B2RA03, A0A0D9SG53, A0A087X0Q6, D6RA82, P07205, P08727, H0YGX7, E9PJK1, B3KUB6, P16422, B4DPP0, B7Z4U6, A0A024RDE8, P26447
4	GO:0030029	actin filament-based process	biological_process	5	B7Z4U6, B3KUB6, H0YGX7, B4DU58, P08727
4	GO:0050817	coagulation	biological_process	3	B4DPP0, B4DVJ1, Q96DZ4
4	GO:0010033	response to organic substance	biological_process	11	B4DH89, Q05DN2, D6RA82, P08727, A4UJ43, A0A024RC76, P37059, C9J2P0, Q9H8M2, P25815, B4DLV6
4	GO:0019222	regulation of metabolic process	biological_process	23	A4UJ43, E9PJK1, P16422, D3DSV0, B4E200, P25815, A0A024RC76, Q9H8M2, A0A087X0Q6, B7Z4U6, P15144, H0Y6D8, P43355, D6RA82, H0YGX7, Q06787, C9J2P0, A0A024RDE8, P55795, Q59H46, B4DLV6, A0A0D9SG53, A0A087WXU6
4	GO:0060322	head development	biological_process	1	B4DH89
4	GO:0009611	response to wounding	biological_process	4	B4DPP0, B4DVJ1, Q96DZ4, Q59H46
4	GO:0009581	detection of external stimulus	biological_process	1	Q96B43
4	GO:0044092	negative regulation of molecular function	biological_process	4	Q05DN2, O15247, A4UJ43, D6RA82
4	GO:0007155	cell adhesion	biological_process	4	P16422, H0YGX7, Q59H46, B4DPP0
4	GO:0009314	response to radiation	biological_process	1	Q96B43
4	GO:0044093	positive regulation of molecular function	biological_process	6	E9PJK1, O15247, D6RA82, C9J2P0, B7Z4U6, P25815
4	GO:0044711	single-organism biosynthetic process	biological_process	2	B4DH89, Q99536
4	GO:0032879	regulation of localization	biological_process	9	H0YGX7, D6RA82, A0A0D9SG53, D3DSV0, Q8IVQ8, O15247, A4UJ43, B4DU58, P08727
4	GO:0035637	multicellular organismal signaling	biological_process	1	B4DPP0
4	GO:0048519	negative regulation of biological process	biological_process	24	A0A0D9SG53, B7Z4U6, A4UJ43, Q9H8M2, A0A087X0Q6, D6RA82, A0A024RC76, H0YGX7, Q99536, P16422, H0Y6D8, P43355, B4DH89, O15247, Q06787, A0A024RDE8, A0A087WXU6, Q59H46, Q05DN2, C9J2P0, B4DU58, P08727, B2RA03, B4DLV6
4	GO:0023051	regulation of signaling	biological_process	10	P25815, Q96B43, E9PJK1, D3DSV0, P43355, H0YGX7, B2R8A2, P26447, B7Z4U6, A4UJ43
4	GO:0044236	multicellular organismal metabolic process	biological_process	1	Q96DZ4
4	GO:0006928	cellular component movement	biological_process	7	H0YGX7, D6RA82, Q96DZ4, Q59H46, B4DPP0, P25815, P08727
4	GO:0006629	lipid metabolic process	biological_process	7	B4DH89, G3V2R9, Q8NFR3, Q99536, B4DVJ1, P37059, E9PJK1
4	GO:0002443	leukocyte mediated immunity	biological_process	1	D6RA82
4	GO:0030030	cell projection organization	biological_process	3	H0YGX7, Q59H46, B7Z4U6
4	GO:0048518	positive regulation of biological process	biological_process	24	E9PJK1, P16422, D3DSV0, Q9H8M2, A0A087X0Q6, P25815, B7Z4U6, B4E200, C9J2P0, B2R8A2, D6RA82, A0A0D9SG53, Q8IVQ8, A0A024RDE8, B3KUB6, Q59H46, B4DPP0, A4UJ43, A0A087WXU6, B4DU58, B4DH89, Q96DZ4, P26447, Q05DN2
4	GO:0050794	regulation of cellular process	biological_process	38	A0A0D9SG53, B7Z4U6, E9PJK1, P16422, D3DSV0, A0A024RC76, B4E200, P25815, Q9H8M2, A0A087X0Q6, Q96B43, H0YGX7, C9J2P0, B2R8A2, Q99536, D6RA82, P43355, B4DH89, Q59H46, P05787, Q9NUU6, Q7Z443, Q8IVQ8, O15247, A4UJ43, A0A024RDE8, B2RA03, P08727, P15144, Q06787, A0A087WXU6, B3KUB6, B4DPP0, B4DU58, Q05DN2, P55795, P26447, H0Y6D8
4	GO:0008219	cell death	biological_process	4	B7Z4U6, Q05DN2, B2RA03, B4DU58
4	GO:0050878	regulation of body fluid levels	biological_process	3	B4DPP0, B4DVJ1, Q96DZ4
4	GO:0003008	system process	biological_process	5	B7Z4U6, P15144, Q7Z443, O15247, B4DPP0
4	GO:0044703	multi-organism reproductive process	biological_process	1	H0YGX7
4	GO:0040008	regulation of growth	biological_process	1	A0A0D9SG53
4	GO:0040012	regulation of locomotion	biological_process	4	B7Z4U6, H0YGX7, D6RA82, P08727
4	GO:0051098	regulation of binding	biological_process	2	O15247, Q05DN2
4	GO:0006091	generation of precursor metabolites and energy	biological_process	2	P07205, B4DH89
4	GO:0006725	cellular aromatic compound metabolic process	biological_process	16	E9PJK1, P16422, D3DSV0, A0A024RC76, Q9H8M2, A0A087X0Q6, C9J2P0, B4DH89, D6RA82, P43355, P55795, H0Y6D8, A4UJ43, B4DLV6, A0A0D9SG53, A0A087WXU6
4	GO:0007154	cell communication	biological_process	24	Q96B43, P25815, P16422, H0YGX7, E9PJK1, D3DSV0, Q59H46, B4DPP0, P43355, O15247, A0A024RDE8, B2RA03, P08727, Q9H8M2, P15144, B3KUB6, D6RA82, Q05DN2, A0A024RC76, C9J2P0, B2R8A2, P26447, B7Z4U6, A4UJ43
4	GO:1901698	response to nitrogen compound	biological_process	1	B4DLV6
4	GO:1901685	glutathione derivative metabolic process	biological_process	1	A4UJ43
4	GO:0050793	regulation of developmental process	biological_process	6	H0YGX7, Q99536, A0A024RDE8, B7Z4U6, D6RA82, B4DU58
4	GO:0044087	regulation of cellular component biogenesis	biological_process	3	B7Z4U6, B4DU58, Q96DZ4
4	GO:0090066	regulation of anatomical structure size	biological_process	2	B7Z4U6, B4DU58
4	GO:0044249	cellular biosynthetic process	biological_process	15	B4DH89, E9PJK1, P16422, D3DSV0, Q9H8M2, A0A087X0Q6, Q99536, Q8NFR3, D6RA82, Q06787, P43355, H0Y6D8, C9J2P0, A0A0D9SG53, A0A087WXU6
4	GO:0009582	detection of abiotic stimulus	biological_process	1	Q96B43
4	GO:1901564	organonitrogen compound metabolic process	biological_process	6	B4DH89, Q8NFR3, C9JSQ1, P15144, O15247, A4UJ43
4	GO:0006996	organelle organization	biological_process	14	C9J406, B7Z4U6, P05787, P08727, B2RA03, C9J2P0, B2R8A2, Q99536, Q9H8M2, B3KUB6, Q05DN2, B4DU58, H0YGX7, Q9UJC3
4	GO:0009636	response to toxic substance	biological_process	1	A4UJ43
4	GO:0006810	transport	biological_process	15	B2R8A2, B2RA03, B7Z4U6, Q9UJC3, D6RA82, B8ZZZ1, A0A0D9SG53, D3DSV0, Q8IVQ8, O15247, A4UJ43, Q9HBR0, B4DPP0, Q7Z443, Q2TU64
4	GO:0007049	cell cycle	biological_process	3	A0A0D9SG53, C9J2P0, Q9H8M2
4	GO:0006081	cellular aldehyde metabolic process	biological_process	1	B4DH89
4	GO:0051239	regulation of multicellular organismal process	biological_process	7	D6RA82, B7Z4U6, B4DU58, A4UJ43, H0YGX7, A0A024RDE8, O15247
4	GO:0009410	response to xenobiotic stimulus	biological_process	2	A4UJ43, B4DH89
4	GO:0006793	phosphorus metabolic process	biological_process	3	E9PJK1, D3DSV0, A4UJ43
4	GO:0035821	modification of morphology or physiology of other organism	biological_process	1	B4E200
4	GO:0061061	muscle structure development	biological_process	3	A0A024RDE8, A0A0D9SG53, P08727
4	GO:0070661	leukocyte proliferation	biological_process	1	E9PJK1
4	GO:1901568	fatty acid derivative metabolic process	biological_process	2	G3V2R9, B4DVJ1
4	GO:0048583	regulation of response to stimulus	biological_process	12	Q96B43, P25815, B8ZZZ1, E9PJK1, D3DSV0, P43355, H0YGX7, C9J2P0, B2R8A2, P26447, B7Z4U6, A4UJ43
4	GO:0009653	anatomical structure morphogenesis	biological_process	15	A0A0D9SG53, Q96DZ4, Q59H46, Q99536, B4DH89, D6RA82, H0YGX7, B2RA03, O15247, Q7Z443, B3KUB6, B7Z4U6, A0A024RDE8, P08727, P26447
4	GO:2000241	regulation of reproductive process	biological_process	1	H0YGX7
4	GO:0034330	cell junction organization	biological_process	1	Q59H46
4	GO:1901576	organic substance biosynthetic process	biological_process	18	B4DH89, E9PJK1, P16422, D3DSV0, Q9H8M2, A0A087X0Q6, Q99536, Q8NFR3, D6RA82, P07205, Q06787, P43355, P37059, H0Y6D8, A4UJ43, C9J2P0, A0A0D9SG53, A0A087WXU6
4	GO:0006790	sulfur compound metabolic process	biological_process	2	O15247, A4UJ43
4	GO:0055114	oxidation-reduction process	biological_process	4	B4DH89, O15247, Q99536, G3V2R9
4	GO:0007568	aging	biological_process	1	P08727
4	GO:1901575	organic substance catabolic process	biological_process	4	A0A024RC76, B4DH89, P07205, P15144
4	GO:0009888	tissue development	biological_process	13	A4UJ43, A0A024RDE8, B3KUB6, D6RA82, Q96DZ4, O15247, Q59H46, P05787, B2RA03, Q7Z443, P07205, P08727, P26447
4	GO:0044712	single-organism catabolic process	biological_process	1	B4DH89
4	GO:0042592	homeostatic process	biological_process	4	D6RA82, O15247, A4UJ43, A0A0D9SG53
4	GO:0006952	defense response	biological_process	5	D6RA82, A0A024RC76, P25815, Q05DN2, C9J2P0
4	GO:0043933	macromolecular complex subunit organization	biological_process	4	B7Z4U6, P08727, B4DU58, Q96DZ4
4	GO:0045103	intermediate filament-based process	biological_process	2	P08727, B2RA03
4	GO:0010817	regulation of hormone levels	biological_process	3	P15144, B4DH89, P37059
4	GO:0022411	cellular component disassembly	biological_process	3	B7Z4U6, B4DU58, Q96DZ4
4	GO:0072089	stem cell proliferation	biological_process	1	P16422
4	GO:0051641	cellular localization	biological_process	12	B2R8A2, B2RA03, Q9UJC3, D6RA82, B8ZZZ1, D3DSV0, E9PJK1, Q8IVQ8, O15247, A4UJ43, B4DPP0, B3KUB6
4	GO:0097435	fibril organization	biological_process	1	B7Z4U6
4	GO:0022607	cellular component assembly	biological_process	7	P08727, Q59H46, B7Z4U6, B4DU58, P05787, B2RA03, Q96DZ4
4	GO:0022412	cellular process involved in reproduction in multicellular organism	biological_process	1	B4DPP0
4	GO:1901615	organic hydroxy compound metabolic process	biological_process	1	B4DH89
4	GO:0005975	carbohydrate metabolic process	biological_process	2	B4DH89, P07205
4	GO:0044702	single organism reproductive process	biological_process	2	B4DPP0, H0YGX7
4	GO:1901360	organic cyclic compound metabolic process	biological_process	18	B4DH89, E9PJK1, P16422, D3DSV0, A0A024RC76, Q9H8M2, A0A087X0Q6, C9J2P0, C9JSQ1, D6RA82, P43355, P37059, P55795, H0Y6D8, A4UJ43, B4DLV6, A0A0D9SG53, A0A087WXU6
4	GO:1901135	carbohydrate derivative metabolic process	biological_process	1	Q8NFR3
4	GO:0007275	multicellular organismal development	biological_process	22	B4DH89, A4UJ43, B4DPP0, P25815, A0A0D9SG53, Q96DZ4, Q9H8M2, B7Z4U6, A0A087WXU6, O15247, Q59H46, H0YGX7, A0A087X0Q6, P05787, Q06787, P15144, A0A024RDE8, Q7Z443, D6RA82, P08727, B3KUB6, P26447
4	GO:0002682	regulation of immune system process	biological_process	2	E9PJK1, C9J2P0
4	GO:1901700	response to oxygen-containing compound	biological_process	2	P37059, Q9H8M2
4	GO:0051707	response to other organism	biological_process	4	D6RA82, A0A024RC76, B8ZZZ1, Q05DN2
4	GO:0051409	response to nitrosative stress	biological_process	1	A4UJ43
5	GO:0051410	detoxification of nitrogen compound	biological_process	1	A4UJ43
5	GO:0016052	carbohydrate catabolic process	biological_process	2	P07205, B4DH89
5	GO:2000242	negative regulation of reproductive process	biological_process	1	H0YGX7
5	GO:0032943	mononuclear cell proliferation	biological_process	1	E9PJK1
5	GO:0034097	response to cytokine stimulus	biological_process	4	B4DH89, Q05DN2, A0A024RC76, C9J2P0
5	GO:0009416	response to light stimulus	biological_process	1	Q96B43
5	GO:1901361	organic cyclic compound catabolic process	biological_process	1	A0A024RC76
5	GO:0051094	positive regulation of developmental process	biological_process	2	B7Z4U6, D6RA82
5	GO:0051238	sequestering of metal ion	biological_process	2	O15247, A4UJ43
5	GO:0051240	positive regulation of multicellular organismal process	biological_process	1	B7Z4U6
5	GO:0007005	mitochondrion organization	biological_process	3	C9J406, Q99536, Q05DN2
5	GO:0060429	epithelium development	biological_process	7	A4UJ43, O15247, P05787, B2RA03, Q7Z443, P07205, P08727
5	GO:0032844	regulation of homeostatic process	biological_process	3	O15247, A4UJ43, A0A0D9SG53
5	GO:0050886	endocrine process	biological_process	1	P15144
5	GO:0033993	response to lipid	biological_process	4	D6RA82, P08727, A4UJ43, P37059
5	GO:0034329	cell junction assembly	biological_process	1	Q59H46
5	GO:0009059	macromolecule biosynthetic process	biological_process	14	E9PJK1, P16422, D3DSV0, Q9H8M2, A0A087X0Q6, D6RA82, Q99536, Q8NFR3, Q06787, P43355, H0Y6D8, C9J2P0, A0A0D9SG53, A0A087WXU6
5	GO:0019538	protein metabolic process	biological_process	15	C9J2P0, P15144, Q9H8M2, P43355, E9PJK1, Q2TU64, Q99536, Q8NFR3, Q96B43, Q96DZ4, Q06787, D3DSV0, B4E200, A4UJ43, B7Z4U6
5	GO:0009615	response to virus	biological_process	3	A0A024RC76, B8ZZZ1, Q05DN2
5	GO:0032984	macromolecular complex disassembly	biological_process	2	B4DU58, B7Z4U6
5	GO:0040013	negative regulation of locomotion	biological_process	3	B7Z4U6, H0YGX7, P08727
5	GO:0051130	positive regulation of cellular component organization	biological_process	5	C9J2P0, B2R8A2, B7Z4U6, B4DU58, Q96DZ4
5	GO:0050790	regulation of catalytic activity	biological_process	4	E9PJK1, H0YGX7, C9J2P0, B7Z4U6
5	GO:0010941	regulation of cell death	biological_process	3	B7Z4U6, B2RA03, Q05DN2
5	GO:0051899	membrane depolarization	biological_process	1	A0A0D9SG53
5	GO:1901566	organonitrogen compound biosynthetic process	biological_process	1	Q8NFR3
5	GO:0051129	negative regulation of cellular component organization	biological_process	4	Q99536, B7Z4U6, C9J2P0, B4DU58
5	GO:0051049	regulation of transport	biological_process	6	A0A0D9SG53, D3DSV0, Q8IVQ8, O15247, A4UJ43, D6RA82
5	GO:0007565	female pregnancy	biological_process	1	H0YGX7
5	GO:0070727	cellular macromolecule localization	biological_process	7	B2RA03, B8ZZZ1, D3DSV0, E9PJK1, Q8IVQ8, B2R8A2, B3KUB6
5	GO:0033627	cell adhesion mediated by integrin	biological_process	1	P16422
5	GO:0009725	response to hormone stimulus	biological_process	3	D6RA82, P08727, A4UJ43
5	GO:0003013	circulatory system process	biological_process	2	P15144, O15247
5	GO:0012501	programmed cell death	biological_process	4	B7Z4U6, Q05DN2, B2RA03, B4DU58
5	GO:0044260	cellular macromolecule metabolic process	biological_process	23	C9J2P0, E9PJK1, P16422, D3DSV0, A0A024RC76, Q9H8M2, A0A087X0Q6, P43355, D6RA82, Q2TU64, Q99536, Q8NFR3, P15144, Q96DZ4, Q06787, Q96B43, B4E200, A4UJ43, P55795, H0Y6D8, B4DLV6, A0A0D9SG53, A0A087WXU6
5	GO:0051093	negative regulation of developmental process	biological_process	1	Q99536
5	GO:0030198	extracellular matrix organization	biological_process	3	B4DU58, B7Z4U6, Q96DZ4
5	GO:0023056	positive regulation of signaling	biological_process	5	P25815, E9PJK1, D3DSV0, B2R8A2, P26447
5	GO:0019439	aromatic compound catabolic process	biological_process	1	A0A024RC76
5	GO:0009892	negative regulation of metabolic process	biological_process	8	A4UJ43, Q9H8M2, A0A087X0Q6, H0Y6D8, P43355, D6RA82, Q06787, B4DLV6
5	GO:0051014	actin filament severing	biological_process	1	B7Z4U6
5	GO:0060255	regulation of macromolecule metabolic process	biological_process	21	E9PJK1, P16422, D3DSV0, A0A024RC76, Q9H8M2, A0A087X0Q6, B7Z4U6, P15144, H0Y6D8, P43355, D6RA82, Q06787, C9J2P0, A4UJ43, P55795, Q59H46, B4E200, P25815, B4DLV6, A0A0D9SG53, A0A087WXU6
5	GO:0042430	indole-containing compound metabolic process	biological_process	1	B4DH89
5	GO:0030154	cell differentiation	biological_process	17	A4UJ43, O15247, Q59H46, P05787, B2RA03, A0A0D9SG53, A0A087X0Q6, D6RA82, P07205, P08727, H0YGX7, P16422, B3KUB6, B4DPP0, B7Z4U6, A0A024RDE8, P26447
5	GO:0007010	cytoskeleton organization	biological_process	7	B7Z4U6, P05787, P08727, B2RA03, B3KUB6, H0YGX7, B4DU58
5	GO:0045185	maintenance of protein location	biological_process	1	B7Z4U6
5	GO:0032535	regulation of cellular component size	biological_process	2	B7Z4U6, B4DU58
5	GO:0048729	tissue morphogenesis	biological_process	1	Q59H46
5	GO:0031323	regulation of cellular metabolic process	biological_process	17	E9PJK1, P16422, D3DSV0, A0A024RC76, B4E200, P25815, Q9H8M2, A0A087X0Q6, P43355, D6RA82, Q06787, C9J2P0, A4UJ43, P55795, A0A0D9SG53, A0A087WXU6, H0Y6D8
5	GO:0007498	mesoderm development	biological_process	1	Q59H46
5	GO:0043603	cellular amide metabolic process	biological_process	3	P15144, O15247, A4UJ43
5	GO:0051241	negative regulation of multicellular organismal process	biological_process	1	D6RA82
5	GO:0070887	cellular response to chemical stimulus	biological_process	7	Q9H8M2, Q05DN2, A4UJ43, B4DH89, A0A024RC76, C9J2P0, B4DLV6
5	GO:0043393	regulation of protein binding	biological_process	1	Q05DN2
5	GO:0050877	neurological system process	biological_process	3	Q7Z443, O15247, B4DPP0
5	GO:0044765	single-organism transport	biological_process	14	B2R8A2, B2RA03, B7Z4U6, Q9UJC3, D6RA82, B8ZZZ1, A0A0D9SG53, D3DSV0, Q8IVQ8, O15247, A4UJ43, Q9HBR0, B4DPP0, Q7Z443
5	GO:0035295	tube development	biological_process	1	Q7Z443
5	GO:0051702	interaction with symbiont	biological_process	1	B4E200
5	GO:0045926	negative regulation of growth	biological_process	1	A0A0D9SG53
5	GO:0051726	regulation of cell cycle	biological_process	3	A0A0D9SG53, C9J2P0, Q9H8M2
5	GO:0002263	cell activation involved in immune response	biological_process	1	D6RA82
5	GO:0048523	negative regulation of cellular process	biological_process	19	A0A0D9SG53, B7Z4U6, Q9H8M2, A0A087X0Q6, A0A024RC76, H0YGX7, Q99536, P16422, P43355, B4DH89, Q06787, A0A024RDE8, A0A087WXU6, D6RA82, C9J2P0, B4DU58, A4UJ43, P08727, B2RA03
5	GO:0019725	cellular homeostasis	biological_process	2	O15247, A4UJ43
5	GO:0009057	macromolecule catabolic process	biological_process	1	A0A024RC76
5	GO:0071702	organic substance transport	biological_process	6	B2RA03, B8ZZZ1, D3DSV0, Q8IVQ8, Q9HBR0, B2R8A2
5	GO:0044270	cellular nitrogen compound catabolic process	biological_process	1	A0A024RC76
5	GO:0048736	appendage development	biological_process	1	Q59H46
5	GO:0043903	regulation of symbiosis, encompassing mutualism through parasitism	biological_process	3	B7Z4U6, A0A024RC76, B4E200
5	GO:0042633	hair cycle	biological_process	1	P08727
5	GO:0044283	small molecule biosynthetic process	biological_process	2	B4DH89, Q99536
5	GO:0050865	regulation of cell activation	biological_process	1	E9PJK1
5	GO:0071214	cellular response to abiotic stimulus	biological_process	2	Q7Z443, Q96B43
5	GO:0040017	positive regulation of locomotion	biological_process	1	D6RA82
5	GO:0006066	alcohol metabolic process	biological_process	1	B4DH89
5	GO:0033043	regulation of organelle organization	biological_process	5	C9J2P0, B2R8A2, Q99536, B7Z4U6, B4DU58
5	GO:0045321	leukocyte activation	biological_process	2	D6RA82, E9PJK1
5	GO:0048284	organelle fusion	biological_process	1	Q99536
5	GO:0043902	positive regulation of multi-organism process	biological_process	1	B4E200
5	GO:0044255	cellular lipid metabolic process	biological_process	5	G3V2R9, Q8NFR3, Q99536, B4DH89, B4DVJ1
5	GO:0031589	cell-substrate adhesion	biological_process	1	Q59H46
5	GO:0009893	positive regulation of metabolic process	biological_process	7	E9PJK1, P16422, D3DSV0, Q9H8M2, A0A087X0Q6, B7Z4U6, C9J2P0
5	GO:0090132	epithelium migration	biological_process	2	D6RA82, P25815
5	GO:0007030	Golgi organization	biological_process	1	B2R8A2
5	GO:0051171	regulation of nitrogen compound metabolic process	biological_process	13	E9PJK1, P16422, D3DSV0, A0A024RC76, Q9H8M2, A0A087X0Q6, D6RA82, P43355, P55795, C9J2P0, A0A0D9SG53, A0A087WXU6, H0Y6D8
5	GO:0032970	regulation of actin filament-based process	biological_process	2	B7Z4U6, B4DU58
5	GO:0006766	vitamin metabolic process	biological_process	1	B4DH89
5	GO:0008202	steroid metabolic process	biological_process	2	B4DH89, P37059
5	GO:0006796	phosphate-containing compound metabolic process	biological_process	3	E9PJK1, D3DSV0, A4UJ43
5	GO:0022402	cell cycle process	biological_process	2	A0A0D9SG53, C9J2P0
5	GO:0001508	regulation of action potential	biological_process	1	B4DPP0
5	GO:0044243	multicellular organismal catabolic process	biological_process	1	Q96DZ4
5	GO:0009617	response to bacterium	biological_process	1	D6RA82
5	GO:0003012	muscle system process	biological_process	2	B7Z4U6, O15247
5	GO:0052192	movement in environment of other organism involved in symbiotic interaction	biological_process	2	B7Z4U6, E9PJK1
5	GO:0042537	benzene-containing compound metabolic process	biological_process	1	A4UJ43
5	GO:0048522	positive regulation of cellular process	biological_process	19	E9PJK1, P16422, D3DSV0, Q9H8M2, A0A087X0Q6, B4E200, P25815, C9J2P0, B2R8A2, D6RA82, B7Z4U6, A0A024RDE8, B3KUB6, Q59H46, B4DPP0, A4UJ43, A0A087WXU6, P26447, Q05DN2
5	GO:0044802	single-organism membrane organization	biological_process	5	C9J406, B4DPP0, B2RA03, Q99536, B2R8A2
5	GO:0080134	regulation of response to stress	biological_process	1	C9J2P0
5	GO:0006082	organic acid metabolic process	biological_process	7	B4DH89, G3V2R9, Q99536, B4DVJ1, C9JSQ1, O15247, A4UJ43
5	GO:0042060	wound healing	biological_process	3	B4DPP0, B4DVJ1, Q96DZ4
5	GO:0044723	single-organism carbohydrate metabolic process	biological_process	2	B4DH89, P07205
5	GO:0007599	hemostasis	biological_process	3	B4DPP0, B4DVJ1, Q96DZ4
5	GO:0050776	regulation of immune response	biological_process	2	E9PJK1, C9J2P0
5	GO:0008610	lipid biosynthetic process	biological_process	4	B4DH89, Q99536, Q8NFR3, P37059
5	GO:0051099	positive regulation of binding	biological_process	1	O15247
5	GO:0061025	membrane fusion	biological_process	2	B4DPP0, Q99536
5	GO:0009790	embryo development	biological_process	3	Q59H46, A0A087X0Q6, B4DH89
5	GO:0007032	endosome organization	biological_process	1	Q9UJC3
5	GO:0045087	innate immune response	biological_process	3	Q05DN2, A0A024RC76, C9J2P0
5	GO:0071705	nitrogen compound transport	biological_process	1	Q9HBR0
5	GO:0018130	heterocycle biosynthetic process	biological_process	11	E9PJK1, P16422, D3DSV0, Q9H8M2, A0A087X0Q6, D6RA82, P43355, H0Y6D8, C9J2P0, A0A0D9SG53, A0A087WXU6
5	GO:0006914	autophagy	biological_process	1	Q59H46
5	GO:0071822	protein complex subunit organization	biological_process	4	B7Z4U6, P08727, B4DU58, Q96DZ4
5	GO:0023057	negative regulation of signaling	biological_process	2	P43355, A4UJ43
5	GO:0080090	regulation of primary metabolic process	biological_process	18	E9PJK1, P16422, D3DSV0, B4E200, P25815, A0A024RC76, Q9H8M2, A0A087X0Q6, P15144, P43355, D6RA82, Q06787, C9J2P0, A4UJ43, P55795, A0A0D9SG53, A0A087WXU6, H0Y6D8
5	GO:0044282	small molecule catabolic process	biological_process	1	B4DH89
5	GO:0046700	heterocycle catabolic process	biological_process	1	A0A024RC76
5	GO:0010646	regulation of cell communication	biological_process	10	Q96B43, P25815, E9PJK1, D3DSV0, P43355, H0YGX7, B2R8A2, P26447, B7Z4U6, A4UJ43
5	GO:0003158	endothelium development	biological_process	1	A4UJ43
5	GO:0010467	gene expression	biological_process	17	E9PJK1, P16422, D3DSV0, Q9H8M2, A0A087X0Q6, B7Z4U6, P15144, H0Y6D8, D6RA82, Q96B43, Q06787, P43355, P55795, B4DLV6, C9J2P0, A0A0D9SG53, A0A087WXU6
5	GO:0019438	aromatic compound biosynthetic process	biological_process	11	E9PJK1, P16422, D3DSV0, Q9H8M2, A0A087X0Q6, D6RA82, P43355, H0Y6D8, C9J2P0, A0A0D9SG53, A0A087WXU6
5	GO:0048646	anatomical structure formation involved in morphogenesis	biological_process	4	Q59H46, Q96DZ4, D6RA82, P08727
5	GO:0006139	nucleobase-containing compound metabolic process	biological_process	14	E9PJK1, P16422, D3DSV0, A0A024RC76, Q9H8M2, A0A087X0Q6, C9J2P0, D6RA82, P43355, P55795, H0Y6D8, B4DLV6, A0A0D9SG53, A0A087WXU6
5	GO:0043412	macromolecule modification	biological_process	8	C9J2P0, Q9H8M2, E9PJK1, D3DSV0, Q96B43, A4UJ43, P43355, B4E200
5	GO:0022603	regulation of anatomical structure morphogenesis	biological_process	4	Q99536, D6RA82, H0YGX7, A0A024RDE8
5	GO:0007165	signal transduction	biological_process	21	Q96B43, P16422, H0YGX7, E9PJK1, D3DSV0, Q59H46, P43355, O15247, A0A024RDE8, B2RA03, P08727, Q9H8M2, P15144, P25815, Q05DN2, A0A024RC76, C9J2P0, B2R8A2, P26447, B7Z4U6, A4UJ43
5	GO:2000026	regulation of multicellular organismal development	biological_process	4	H0YGX7, A0A024RDE8, B7Z4U6, D6RA82
5	GO:0048731	system development	biological_process	19	B4DH89, A4UJ43, B4DPP0, P25815, A0A0D9SG53, Q96DZ4, Q9H8M2, B7Z4U6, A0A087WXU6, O15247, A0A087X0Q6, Q7Z443, Q59H46, D6RA82, H0YGX7, P08727, A0A024RDE8, B3KUB6, P26447
5	GO:0051640	organelle localization	biological_process	1	B2R8A2
5	GO:0032989	cellular component morphogenesis	biological_process	6	H0YGX7, B3KUB6, B7Z4U6, A0A024RDE8, P08727, P26447
5	GO:0016050	vesicle organization	biological_process	1	B2R8A2
5	GO:0051270	regulation of cellular component movement	biological_process	3	H0YGX7, D6RA82, P08727
5	GO:0007033	vacuole organization	biological_process	1	Q9UJC3
5	GO:0052803	imidazole-containing compound metabolic process	biological_process	1	B4DH89
5	GO:1901687	glutathione derivative biosynthetic process	biological_process	1	A4UJ43
5	GO:0032880	regulation of protein localization	biological_process	2	D3DSV0, Q8IVQ8
5	GO:0048285	organelle fission	biological_process	1	C9J2P0
5	GO:0044259	multicellular organismal macromolecule metabolic process	biological_process	1	Q96DZ4
5	GO:0048870	cell motility	biological_process	6	H0YGX7, D6RA82, Q96DZ4, Q59H46, P25815, P08727
5	GO:0016337	cell-cell adhesion	biological_process	2	P16422, Q59H46
5	GO:0000278	mitotic cell cycle	biological_process	2	A0A0D9SG53, C9J2P0
5	GO:0016042	lipid catabolic process	biological_process	1	B4DH89
5	GO:0033554	cellular response to stress	biological_process	3	A4UJ43, C9J2P0, Q9H8M2
5	GO:0051649	establishment of localization in cell	biological_process	10	B2R8A2, B2RA03, Q9UJC3, D6RA82, B8ZZZ1, D3DSV0, Q8IVQ8, O15247, A4UJ43, B4DPP0
5	GO:0032101	regulation of response to external stimulus	biological_process	1	Q96B43
5	GO:0016192	vesicle-mediated transport	biological_process	7	B2R8A2, B2RA03, B7Z4U6, D6RA82, Q9UJC3, B8ZZZ1, B4DPP0
5	GO:0051100	negative regulation of binding	biological_process	1	Q05DN2
5	GO:0042127	regulation of cell proliferation	biological_process	3	E9PJK1, B4DH89, P16422
5	GO:0048584	positive regulation of response to stimulus	biological_process	6	P25815, E9PJK1, D3DSV0, C9J2P0, B2R8A2, P26447
5	GO:1901362	organic cyclic compound biosynthetic process	biological_process	12	B4DH89, E9PJK1, P16422, D3DSV0, Q9H8M2, A0A087X0Q6, D6RA82, P43355, H0Y6D8, C9J2P0, A0A0D9SG53, A0A087WXU6
5	GO:0051817	modification of morphology or physiology of other organism involved in symbiotic interaction	biological_process	1	B4E200
5	GO:0030155	regulation of cell adhesion	biological_process	2	P16422, H0YGX7
5	GO:0009889	regulation of biosynthetic process	biological_process	12	E9PJK1, P16422, D3DSV0, Q9H8M2, A0A087X0Q6, D6RA82, Q06787, P43355, C9J2P0, A0A0D9SG53, A0A087WXU6, H0Y6D8
5	GO:0051825	adhesion to other organism involved in symbiotic interaction	biological_process	1	E9PJK1
5	GO:0031344	regulation of cell projection organization	biological_process	1	H0YGX7
5	GO:0014070	response to organic cyclic compound	biological_process	4	D6RA82, P08727, A4UJ43, B4DLV6
5	GO:0051276	chromosome organization	biological_process	2	Q9H8M2, C9J2P0
5	GO:0002684	positive regulation of immune system process	biological_process	2	E9PJK1, C9J2P0
5	GO:0044057	regulation of system process	biological_process	1	O15247
5	GO:0065003	macromolecular complex assembly	biological_process	3	B7Z4U6, B4DU58, Q96DZ4
5	GO:0070925	organelle assembly	biological_process	3	B4DU58, B7Z4U6, P08727
5	GO:0002444	myeloid leukocyte mediated immunity	biological_process	1	D6RA82
5	GO:0009308	amine metabolic process	biological_process	1	B4DH89
5	GO:0044271	cellular nitrogen compound biosynthetic process	biological_process	11	E9PJK1, P16422, D3DSV0, Q9H8M2, A0A087X0Q6, D6RA82, P43355, H0Y6D8, C9J2P0, A0A0D9SG53, A0A087WXU6
5	GO:0043901	negative regulation of multi-organism process	biological_process	2	B7Z4U6, A0A024RC76
5	GO:1901565	organonitrogen compound catabolic process	biological_process	2	B4DH89, P15144
5	GO:0048878	chemical homeostasis	biological_process	3	O15247, A4UJ43, A0A0D9SG53
5	GO:0045184	establishment of protein localization	biological_process	5	B2RA03, B8ZZZ1, D3DSV0, Q8IVQ8, B2R8A2
5	GO:0001558	regulation of cell growth	biological_process	1	A0A0D9SG53
5	GO:0009566	fertilization	biological_process	1	B4DPP0
5	GO:0051701	interaction with host	biological_process	2	B7Z4U6, E9PJK1
5	GO:0048585	negative regulation of response to stimulus	biological_process	2	P43355, A4UJ43
5	GO:0042445	hormone metabolic process	biological_process	3	P15144, B4DH89, P37059
5	GO:0003014	renal system process	biological_process	1	B7Z4U6
5	GO:0016032	viral process	biological_process	4	B7Z4U6, A0A024RC76, B4E200, E9PJK1
5	GO:0060341	regulation of cellular localization	biological_process	4	D3DSV0, Q8IVQ8, O15247, A4UJ43
6	GO:0045104	intermediate filament cytoskeleton organization	biological_process	2	P08727, B2RA03
6	GO:0019058	viral life cycle	biological_process	4	B7Z4U6, A0A024RC76, B4E200, E9PJK1
6	GO:0007044	cell-substrate junction assembly	biological_process	1	Q59H46
6	GO:0090257	regulation of muscle system process	biological_process	1	O15247
6	GO:0046907	intracellular transport	biological_process	8	B2R8A2, B2RA03, Q9UJC3, B8ZZZ1, D3DSV0, Q8IVQ8, O15247, A4UJ43
6	GO:0002446	neutrophil mediated immunity	biological_process	1	D6RA82
6	GO:0051648	vesicle localization	biological_process	1	B2R8A2
6	GO:0016054	organic acid catabolic process	biological_process	1	B4DH89
6	GO:0044267	cellular protein metabolic process	biological_process	12	C9J2P0, Q9H8M2, P43355, E9PJK1, Q2TU64, P15144, Q96DZ4, Q06787, D3DSV0, Q96B43, B4E200, A4UJ43
6	GO:0044106	cellular amine metabolic process	biological_process	1	B4DH89
6	GO:0007338	single fertilization	biological_process	1	B4DPP0
6	GO:0002274	myeloid leukocyte activation	biological_process	1	D6RA82
6	GO:0051828	entry into other organism involved in symbiotic interaction	biological_process	2	B7Z4U6, E9PJK1
6	GO:0071310	cellular response to organic substance	biological_process	5	Q05DN2, A0A024RC76, C9J2P0, A4UJ43, B4DLV6
6	GO:0019226	transmission of nerve impulse	biological_process	1	B4DPP0
6	GO:0008015	blood circulation	biological_process	2	P15144, O15247
6	GO:0031347	regulation of defense response	biological_process	1	C9J2P0
6	GO:0002520	immune system development	biological_process	1	A0A087X0Q6
6	GO:0010638	positive regulation of organelle organization	biological_process	3	C9J2P0, B2R8A2, B7Z4U6
6	GO:0005996	monosaccharide metabolic process	biological_process	2	B4DH89, P07205
6	GO:2000145	regulation of cell motility	biological_process	3	H0YGX7, D6RA82, P08727
6	GO:0034645	cellular macromolecule biosynthetic process	biological_process	14	E9PJK1, P16422, D3DSV0, Q9H8M2, A0A087X0Q6, D6RA82, Q99536, Q8NFR3, Q06787, P43355, H0Y6D8, C9J2P0, A0A0D9SG53, A0A087WXU6
6	GO:0055082	cellular chemical homeostasis	biological_process	2	O15247, A4UJ43
6	GO:0046903	secretion	biological_process	2	D6RA82, B4DPP0
6	GO:0051050	positive regulation of transport	biological_process	3	A0A0D9SG53, D3DSV0, Q8IVQ8
6	GO:0045786	negative regulation of cell cycle	biological_process	2	A0A0D9SG53, C9J2P0
6	GO:0019216	regulation of lipid metabolic process	biological_process	1	E9PJK1
6	GO:0050778	positive regulation of immune response	biological_process	1	C9J2P0
6	GO:0044406	adhesion to host	biological_process	1	E9PJK1
6	GO:0034654	nucleobase-containing compound biosynthetic process	biological_process	11	E9PJK1, P16422, D3DSV0, Q9H8M2, A0A087X0Q6, D6RA82, P43355, H0Y6D8, C9J2P0, A0A0D9SG53, A0A087WXU6
6	GO:0043085	positive regulation of catalytic activity	biological_process	3	E9PJK1, C9J2P0, B7Z4U6
6	GO:0034655	nucleobase-containing compound catabolic process	biological_process	1	A0A024RC76
6	GO:0048863	stem cell differentiation	biological_process	2	P16422, P26447
6	GO:0051246	regulation of protein metabolic process	biological_process	8	P15144, Q9H8M2, P43355, E9PJK1, Q06787, D3DSV0, C9J2P0, A4UJ43
6	GO:1902115	regulation of organelle assembly	biological_process	2	B4DU58, B7Z4U6
6	GO:0055085	transmembrane transport	biological_process	4	Q9HBR0, A0A0D9SG53, O15247, A4UJ43
6	GO:0032526	response to retinoic acid	biological_process	1	P37059
6	GO:0010942	positive regulation of cell death	biological_process	2	B7Z4U6, Q05DN2
6	GO:0002366	leukocyte activation involved in immune response	biological_process	1	D6RA82
6	GO:0002764	immune response-regulating signaling pathway	biological_process	1	C9J2P0
6	GO:0010556	regulation of macromolecule biosynthetic process	biological_process	12	E9PJK1, P16422, D3DSV0, Q9H8M2, A0A087X0Q6, D6RA82, Q06787, P43355, C9J2P0, A0A0D9SG53, A0A087WXU6, H0Y6D8
6	GO:0032409	regulation of transporter activity	biological_process	3	A0A0D9SG53, O15247, A4UJ43
6	GO:0051336	regulation of hydrolase activity	biological_process	1	B7Z4U6
6	GO:0051340	regulation of ligase activity	biological_process	1	C9J2P0
6	GO:0050867	positive regulation of cell activation	biological_process	1	E9PJK1
6	GO:0009792	embryo development ending in birth or egg hatching	biological_process	1	B4DH89
6	GO:0001501	skeletal system development	biological_process	1	Q96DZ4
6	GO:1901699	cellular response to nitrogen compound	biological_process	1	B4DLV6
6	GO:0016051	carbohydrate biosynthetic process	biological_process	2	P07205, B4DH89
6	GO:0031325	positive regulation of cellular metabolic process	biological_process	6	E9PJK1, P16422, D3DSV0, Q9H8M2, A0A087X0Q6, C9J2P0
6	GO:0051656	establishment of organelle localization	biological_process	1	B2R8A2
6	GO:0010604	positive regulation of macromolecule metabolic process	biological_process	7	E9PJK1, P16422, D3DSV0, Q9H8M2, A0A087X0Q6, B7Z4U6, C9J2P0
6	GO:0009583	detection of light stimulus	biological_process	1	Q96B43
6	GO:0007009	plasma membrane organization	biological_process	1	B2RA03
6	GO:0010639	negative regulation of organelle organization	biological_process	4	Q99536, B7Z4U6, C9J2P0, B4DU58
6	GO:0036211	protein modification process	biological_process	8	C9J2P0, Q9H8M2, E9PJK1, D3DSV0, Q96B43, A4UJ43, P43355, B4E200
6	GO:0006974	response to DNA damage stimulus	biological_process	1	C9J2P0
6	GO:0033628	regulation of cell adhesion mediated by integrin	biological_process	1	P16422
6	GO:0051172	negative regulation of nitrogen compound metabolic process	biological_process	3	Q9H8M2, A0A087X0Q6, P43355
6	GO:0010605	negative regulation of macromolecule metabolic process	biological_process	7	Q9H8M2, A0A087X0Q6, H0Y6D8, P43355, D6RA82, Q06787, B4DLV6
6	GO:0010468	regulation of gene expression	biological_process	15	E9PJK1, P16422, D3DSV0, Q9H8M2, A0A087X0Q6, B7Z4U6, H0Y6D8, D6RA82, Q06787, P43355, P55795, B4DLV6, C9J2P0, A0A0D9SG53, A0A087WXU6
6	GO:0051493	regulation of cytoskeleton organization	biological_process	2	B7Z4U6, B4DU58
6	GO:0070458	cellular detoxification of nitrogen compound	biological_process	1	A4UJ43
6	GO:0030308	negative regulation of cell growth	biological_process	1	A0A0D9SG53
6	GO:0000075	cell cycle checkpoint	biological_process	1	C9J2P0
6	GO:0002694	regulation of leukocyte activation	biological_process	1	E9PJK1
6	GO:0043436	oxoacid metabolic process	biological_process	7	B4DH89, G3V2R9, Q99536, B4DVJ1, C9JSQ1, O15247, A4UJ43
6	GO:0007160	cell-matrix adhesion	biological_process	1	Q59H46
6	GO:0048545	response to steroid hormone stimulus	biological_process	3	D6RA82, P08727, A4UJ43
6	GO:0051851	modification by host of symbiont morphology or physiology	biological_process	1	B4E200
6	GO:0070663	regulation of leukocyte proliferation	biological_process	1	E9PJK1
6	GO:0042692	muscle cell differentiation	biological_process	1	P08727
6	GO:0007162	negative regulation of cell adhesion	biological_process	2	P16422, H0YGX7
6	GO:0033631	cell-cell adhesion mediated by integrin	biological_process	1	P16422
6	GO:0007566	embryo implantation	biological_process	1	H0YGX7
6	GO:0043067	regulation of programmed cell death	biological_process	3	B7Z4U6, B2RA03, Q05DN2
6	GO:0051272	positive regulation of cellular component movement	biological_process	1	D6RA82
6	GO:0032990	cell part morphogenesis	biological_process	2	H0YGX7, B7Z4U6
6	GO:0006767	water-soluble vitamin metabolic process	biological_process	1	B4DH89
6	GO:0007006	mitochondrial membrane organization	biological_process	1	C9J406
6	GO:0016477	cell migration	biological_process	6	H0YGX7, D6RA82, Q96DZ4, Q59H46, P25815, P08727
6	GO:0006694	steroid biosynthetic process	biological_process	1	B4DH89
6	GO:0042742	defense response to bacterium	biological_process	1	D6RA82
6	GO:0019219	regulation of nucleobase-containing compound metabolic process	biological_process	13	E9PJK1, P16422, D3DSV0, A0A024RC76, Q9H8M2, A0A087X0Q6, D6RA82, P43355, P55795, C9J2P0, A0A0D9SG53, A0A087WXU6, H0Y6D8
6	GO:0006900	membrane budding	biological_process	1	B2R8A2
6	GO:0006461	protein complex assembly	biological_process	3	B7Z4U6, B4DU58, Q96DZ4
6	GO:0010564	regulation of cell cycle process	biological_process	2	A0A0D9SG53, C9J2P0
6	GO:0050801	ion homeostasis	biological_process	3	O15247, A4UJ43, A0A0D9SG53
6	GO:0022617	extracellular matrix disassembly	biological_process	3	B4DU58, B7Z4U6, Q96DZ4
6	GO:0051338	regulation of transferase activity	biological_process	1	E9PJK1
6	GO:0072359	circulatory system development	biological_process	1	D6RA82
6	GO:0032091	negative regulation of protein binding	biological_process	1	Q05DN2
6	GO:0048598	embryonic morphogenesis	biological_process	2	Q59H46, B4DH89
6	GO:0070201	regulation of establishment of protein localization	biological_process	2	D3DSV0, Q8IVQ8
6	GO:0071478	cellular response to radiation	biological_process	1	Q96B43
6	GO:0046486	glycerolipid metabolic process	biological_process	1	B4DH89
6	GO:0007040	lysosome organization	biological_process	1	Q9UJC3
6	GO:0071466	cellular response to xenobiotic stimulus	biological_process	2	A4UJ43, B4DH89
6	GO:0007600	sensory perception	biological_process	1	Q7Z443
6	GO:0016053	organic acid biosynthetic process	biological_process	2	B4DH89, Q99536
6	GO:0006518	peptide metabolic process	biological_process	3	P15144, O15247, A4UJ43
6	GO:0010927	cellular component assembly involved in morphogenesis	biological_process	1	P08727
6	GO:0006508	proteolysis	biological_process	1	Q96DZ4
6	GO:0015031	protein transport	biological_process	5	B2RA03, B8ZZZ1, D3DSV0, Q8IVQ8, B2R8A2
6	GO:0035556	intracellular signal transduction	biological_process	5	H0YGX7, E9PJK1, O15247, B2R8A2, P26447
6	GO:0030036	actin cytoskeleton organization	biological_process	5	B7Z4U6, B3KUB6, H0YGX7, B4DU58, P08727
6	GO:0043241	protein complex disassembly	biological_process	2	B4DU58, B7Z4U6
6	GO:0048513	organ development	biological_process	11	B4DH89, A0A0D9SG53, Q96DZ4, O15247, A0A087X0Q6, Q7Z443, P08727, Q59H46, A0A024RDE8, D6RA82, P26447
6	GO:0051604	protein maturation	biological_process	2	P15144, Q96B43
6	GO:0043331	response to dsRNA	biological_process	1	B4DLV6
6	GO:0000902	cell morphogenesis	biological_process	5	H0YGX7, B3KUB6, B7Z4U6, A0A024RDE8, P26447
6	GO:0051051	negative regulation of transport	biological_process	1	O15247
6	GO:0048468	cell development	biological_process	7	A4UJ43, H0YGX7, B3KUB6, B4DPP0, A0A024RDE8, P08727, P26447
6	GO:0030865	cortical cytoskeleton organization	biological_process	1	B3KUB6
6	GO:0001655	urogenital system development	biological_process	2	Q7Z443, Q59H46
6	GO:0034613	cellular protein localization	biological_process	7	B2RA03, B8ZZZ1, D3DSV0, E9PJK1, Q8IVQ8, B2R8A2, B3KUB6
6	GO:0072091	regulation of stem cell proliferation	biological_process	1	P16422
6	GO:0050792	regulation of viral process	biological_process	3	B7Z4U6, A0A024RC76, B4E200
6	GO:0032963	collagen metabolic process	biological_process	1	Q96DZ4
6	GO:0051173	positive regulation of nitrogen compound metabolic process	biological_process	5	E9PJK1, P16422, D3DSV0, Q9H8M2, A0A087X0Q6
6	GO:0034340	response to type I interferon	biological_process	2	Q05DN2, A0A024RC76
6	GO:0010648	negative regulation of cell communication	biological_process	2	P43355, A4UJ43
6	GO:0006643	membrane lipid metabolic process	biological_process	1	Q8NFR3
6	GO:0007166	cell surface receptor signaling pathway	biological_process	8	Q96B43, D3DSV0, Q59H46, P43355, A0A024RDE8, Q05DN2, A0A024RC76, C9J2P0
6	GO:0010647	positive regulation of cell communication	biological_process	5	P25815, E9PJK1, D3DSV0, B2R8A2, P26447
6	GO:0030855	epithelial cell differentiation	biological_process	4	A4UJ43, O15247, P07205, P08727
6	GO:0044265	cellular macromolecule catabolic process	biological_process	1	A0A024RC76
6	GO:0051271	negative regulation of cellular component movement	biological_process	2	H0YGX7, P08727
6	GO:0022403	cell cycle phase	biological_process	2	A0A0D9SG53, C9J2P0
6	GO:0048332	mesoderm morphogenesis	biological_process	1	Q59H46
6	GO:0051607	defense response to virus	biological_process	1	A0A024RC76
6	GO:0044770	cell cycle phase transition	biological_process	2	A0A0D9SG53, C9J2P0
6	GO:0016310	phosphorylation	biological_process	3	E9PJK1, D3DSV0, A4UJ43
6	GO:0090304	nucleic acid metabolic process	biological_process	14	E9PJK1, P16422, D3DSV0, A0A024RC76, Q9H8M2, A0A087X0Q6, C9J2P0, D6RA82, P43355, P55795, H0Y6D8, B4DLV6, A0A0D9SG53, A0A087WXU6
6	GO:0052126	movement in host environment	biological_process	2	B7Z4U6, E9PJK1
6	GO:0044724	single-organism carbohydrate catabolic process	biological_process	2	P07205, B4DH89
6	GO:0051174	regulation of phosphorus metabolic process	biological_process	3	E9PJK1, D3DSV0, A4UJ43
6	GO:0022407	regulation of cell-cell adhesion	biological_process	1	P16422
6	GO:0006897	endocytosis	biological_process	2	B8ZZZ1, D6RA82
6	GO:0035455	response to interferon-alpha	biological_process	1	Q05DN2
6	GO:0018916	nitrobenzene metabolic process	biological_process	1	A4UJ43
6	GO:0007346	regulation of mitotic cell cycle	biological_process	2	A0A0D9SG53, C9J2P0
6	GO:0003015	heart process	biological_process	1	O15247
6	GO:0060173	limb development	biological_process	1	Q59H46
6	GO:0043500	muscle adaptation	biological_process	1	B7Z4U6
6	GO:0007399	nervous system development	biological_process	6	A4UJ43, B4DH89, B4DPP0, P25815, H0YGX7, B3KUB6
6	GO:0015849	organic acid transport	biological_process	1	Q9HBR0
6	GO:0009966	regulation of signal transduction	biological_process	9	Q96B43, E9PJK1, D3DSV0, P43355, H0YGX7, B2R8A2, P26447, B7Z4U6, A4UJ43
6	GO:0008285	negative regulation of cell proliferation	biological_process	1	B4DH89
6	GO:0046649	lymphocyte activation	biological_process	1	E9PJK1
6	GO:0010821	regulation of mitochondrion organization	biological_process	1	Q99536
6	GO:0006325	chromatin organization	biological_process	2	Q9H8M2, C9J2P0
6	GO:0006915	apoptotic process	biological_process	3	B7Z4U6, Q05DN2, B2RA03
6	GO:0008284	positive regulation of cell proliferation	biological_process	2	E9PJK1, P16422
6	GO:0006720	isoprenoid metabolic process	biological_process	1	B4DH89
6	GO:0000280	nuclear division	biological_process	1	C9J2P0
6	GO:0009891	positive regulation of biosynthetic process	biological_process	5	E9PJK1, P16422, D3DSV0, Q9H8M2, A0A087X0Q6
6	GO:0070293	renal absorption	biological_process	1	B7Z4U6
6	GO:0006811	ion transport	biological_process	5	A0A0D9SG53, O15247, A4UJ43, Q9HBR0, Q7Z443
6	GO:0031326	regulation of cellular biosynthetic process	biological_process	12	E9PJK1, P16422, D3DSV0, Q9H8M2, A0A087X0Q6, D6RA82, Q06787, P43355, C9J2P0, A0A0D9SG53, A0A087WXU6, H0Y6D8
6	GO:0034754	cellular hormone metabolic process	biological_process	2	B4DH89, P37059
6	GO:0031324	negative regulation of cellular metabolic process	biological_process	4	Q9H8M2, A0A087X0Q6, P43355, Q06787
6	GO:0034308	primary alcohol metabolic process	biological_process	1	B4DH89
6	GO:0045595	regulation of cell differentiation	biological_process	3	H0YGX7, B7Z4U6, A0A024RDE8
6	GO:0007596	blood coagulation	biological_process	3	B4DPP0, B4DVJ1, Q96DZ4
6	GO:0044242	cellular lipid catabolic process	biological_process	1	B4DH89
6	GO:0055123	digestive system development	biological_process	1	Q59H46
6	GO:0006936	muscle contraction	biological_process	1	O15247
6	GO:0034622	cellular macromolecular complex assembly	biological_process	2	B7Z4U6, B4DU58
6	GO:0044801	single-organism membrane fusion	biological_process	2	B4DPP0, Q99536
6	GO:1990000	amyloid fibril formation	biological_process	1	B7Z4U6
6	GO:0009890	negative regulation of biosynthetic process	biological_process	4	Q9H8M2, A0A087X0Q6, Q06787, P43355
6	GO:0060548	negative regulation of cell death	biological_process	1	B2RA03
7	GO:0043244	regulation of protein complex disassembly	biological_process	2	B4DU58, B7Z4U6
7	GO:0031349	positive regulation of defense response	biological_process	1	C9J2P0
7	GO:0030334	regulation of cell migration	biological_process	3	H0YGX7, D6RA82, P08727
7	GO:0033629	negative regulation of cell adhesion mediated by integrin	biological_process	1	P16422
7	GO:0051249	regulation of lymphocyte activation	biological_process	1	E9PJK1
7	GO:0072358	cardiovascular system development	biological_process	1	D6RA82
7	GO:0007186	G-protein coupled receptor signaling pathway	biological_process	1	Q96B43
7	GO:0034762	regulation of transmembrane transport	biological_process	3	A0A0D9SG53, O15247, A4UJ43
7	GO:0045446	endothelial cell differentiation	biological_process	1	A4UJ43
7	GO:0007606	sensory perception of chemical stimulus	biological_process	1	Q7Z443
7	GO:0032944	regulation of mononuclear cell proliferation	biological_process	1	E9PJK1
7	GO:0043588	skin development	biological_process	3	O15247, P08727, Q59H46
7	GO:0006457	protein folding	biological_process	2	Q2TU64, B4E200
7	GO:2000021	regulation of ion homeostasis	biological_process	3	O15247, A4UJ43, A0A0D9SG53
7	GO:0048193	Golgi vesicle transport	biological_process	2	B2R8A2, B2RA03
7	GO:0008209	androgen metabolic process	biological_process	1	P37059
7	GO:0008053	mitochondrial fusion	biological_process	1	Q99536
7	GO:0042214	terpene metabolic process	biological_process	1	B4DH89
7	GO:0007167	enzyme linked receptor protein signaling pathway	biological_process	1	D3DSV0
7	GO:0009887	organ morphogenesis	biological_process	3	A0A0D9SG53, Q96DZ4, Q59H46
7	GO:0051351	positive regulation of ligase activity	biological_process	1	C9J2P0
7	GO:0055080	cation homeostasis	biological_process	2	O15247, A4UJ43
7	GO:0032268	regulation of cellular protein metabolic process	biological_process	7	Q9H8M2, P43355, E9PJK1, Q06787, D3DSV0, C9J2P0, A4UJ43
7	GO:0008637	apoptotic mitochondrial changes	biological_process	1	Q05DN2
7	GO:0048525	negative regulation of viral process	biological_process	2	B7Z4U6, A0A024RC76
7	GO:1901987	regulation of cell cycle phase transition	biological_process	2	A0A0D9SG53, C9J2P0
7	GO:0040029	regulation of gene expression, epigenetic	biological_process	2	H0Y6D8, B4DLV6
7	GO:0010628	positive regulation of gene expression	biological_process	6	E9PJK1, P16422, D3DSV0, Q9H8M2, A0A087X0Q6, B7Z4U6
7	GO:0031532	actin cytoskeleton reorganization	biological_process	1	B7Z4U6
7	GO:1902117	positive regulation of organelle assembly	biological_process	1	B4DU58
7	GO:0031581	hemidesmosome assembly	biological_process	1	Q59H46
7	GO:0031328	positive regulation of cellular biosynthetic process	biological_process	5	E9PJK1, P16422, D3DSV0, Q9H8M2, A0A087X0Q6
7	GO:0007243	intracellular protein kinase cascade	biological_process	3	E9PJK1, B2R8A2, P26447
7	GO:0051783	regulation of nuclear division	biological_process	1	C9J2P0
7	GO:0072657	protein localization to membrane	biological_process	1	B2RA03
7	GO:0010608	posttranscriptional regulation of gene expression	biological_process	4	B7Z4U6, E9PJK1, Q06787, B4DLV6
7	GO:0097285	cell-type specific apoptotic process	biological_process	1	B7Z4U6
7	GO:0017038	protein import	biological_process	1	D3DSV0
7	GO:0006909	phagocytosis	biological_process	1	D6RA82
7	GO:0051223	regulation of protein transport	biological_process	2	D3DSV0, Q8IVQ8
7	GO:0006937	regulation of muscle contraction	biological_process	1	O15247
7	GO:0007015	actin filament organization	biological_process	2	B7Z4U6, B4DU58
7	GO:0045834	positive regulation of lipid metabolic process	biological_process	1	E9PJK1
7	GO:0051345	positive regulation of hydrolase activity	biological_process	1	B7Z4U6
7	GO:0033365	protein localization to organelle	biological_process	2	D3DSV0, E9PJK1
7	GO:0031577	spindle checkpoint	biological_process	1	C9J2P0
7	GO:0006805	xenobiotic metabolic process	biological_process	2	A4UJ43, B4DH89
7	GO:0009584	detection of visible light	biological_process	1	Q96B43
7	GO:0051325	interphase	biological_process	2	A0A0D9SG53, C9J2P0
7	GO:0060177	regulation of angiotensin metabolic process	biological_process	1	P15144
7	GO:0046651	lymphocyte proliferation	biological_process	1	E9PJK1
7	GO:0002696	positive regulation of leukocyte activation	biological_process	1	E9PJK1
7	GO:0006464	cellular protein modification process	biological_process	8	C9J2P0, Q9H8M2, E9PJK1, D3DSV0, Q96B43, A4UJ43, P43355, B4E200
7	GO:0008300	isoprenoid catabolic process	biological_process	1	B4DH89
7	GO:0001667	ameboidal cell migration	biological_process	3	H0YGX7, D6RA82, P25815
7	GO:0051169	nuclear transport	biological_process	2	D3DSV0, Q8IVQ8
7	GO:0006898	receptor-mediated endocytosis	biological_process	1	B8ZZZ1
7	GO:0031327	negative regulation of cellular biosynthetic process	biological_process	4	Q9H8M2, A0A087X0Q6, Q06787, P43355
7	GO:0019932	second-messenger-mediated signaling	biological_process	1	O15247
7	GO:0007369	gastrulation	biological_process	1	Q59H46
7	GO:0019079	viral genome replication	biological_process	2	A0A024RC76, B4E200
7	GO:0051259	protein oligomerization	biological_process	1	Q96DZ4
7	GO:0043068	positive regulation of programmed cell death	biological_process	2	B7Z4U6, Q05DN2
7	GO:0006664	glycolipid metabolic process	biological_process	1	Q8NFR3
7	GO:0044650	adhesion of symbiont to host cell	biological_process	1	E9PJK1
7	GO:0007417	central nervous system development	biological_process	3	B4DH89, B4DPP0, P25815
7	GO:0009968	negative regulation of signal transduction	biological_process	2	P43355, A4UJ43
7	GO:0032940	secretion by cell	biological_process	2	D6RA82, B4DPP0
7	GO:0019318	hexose metabolic process	biological_process	2	P07205, B4DH89
7	GO:0055001	muscle cell development	biological_process	1	P08727
7	GO:0090305	nucleic acid phosphodiester bond hydrolysis	biological_process	1	A0A024RC76
7	GO:0044331	cell-cell adhesion mediated by cadherin	biological_process	1	P16422
7	GO:0007423	sensory organ development	biological_process	1	B4DH89
7	GO:0046364	monosaccharide biosynthetic process	biological_process	2	P07205, B4DH89
7	GO:0043254	regulation of protein complex assembly	biological_process	3	B7Z4U6, B4DU58, Q96DZ4
7	GO:0010823	negative regulation of mitochondrion organization	biological_process	1	Q99536
7	GO:0033632	regulation of cell-cell adhesion mediated by integrin	biological_process	1	P16422
7	GO:2000112	regulation of cellular macromolecule biosynthetic process	biological_process	12	E9PJK1, P16422, D3DSV0, Q9H8M2, A0A087X0Q6, D6RA82, Q06787, P43355, C9J2P0, A0A0D9SG53, A0A087WXU6, H0Y6D8
7	GO:0008217	regulation of blood pressure	biological_process	1	P15144
7	GO:0071800	podosome assembly	biological_process	2	B4DU58, B7Z4U6
7	GO:0048524	positive regulation of viral process	biological_process	1	B4E200
7	GO:0051347	positive regulation of transferase activity	biological_process	1	E9PJK1
7	GO:0010948	negative regulation of cell cycle process	biological_process	2	A0A0D9SG53, C9J2P0
7	GO:0051247	positive regulation of protein metabolic process	biological_process	4	Q9H8M2, E9PJK1, D3DSV0, C9J2P0
7	GO:0002253	activation of immune response	biological_process	1	C9J2P0
7	GO:0002275	myeloid cell activation involved in immune response	biological_process	1	D6RA82
7	GO:0014888	striated muscle adaptation	biological_process	1	B7Z4U6
7	GO:0045935	positive regulation of nucleobase-containing compound metabolic process	biological_process	5	E9PJK1, P16422, D3DSV0, Q9H8M2, A0A087X0Q6
7	GO:0007264	small GTPase mediated signal transduction	biological_process	1	H0YGX7
7	GO:0019228	regulation of action potential in neuron	biological_process	1	B4DPP0
7	GO:0090068	positive regulation of cell cycle process	biological_process	1	C9J2P0
7	GO:0048565	digestive tract development	biological_process	1	Q59H46
7	GO:0016070	RNA metabolic process	biological_process	14	E9PJK1, P16422, D3DSV0, A0A024RC76, Q9H8M2, A0A087X0Q6, D6RA82, P43355, P55795, H0Y6D8, B4DLV6, C9J2P0, A0A0D9SG53, A0A087WXU6
7	GO:0044788	modulation by host of viral process	biological_process	1	B4E200
7	GO:0097017	renal protein absorption	biological_process	1	B7Z4U6
7	GO:0010629	negative regulation of gene expression	biological_process	5	Q9H8M2, A0A087X0Q6, H0Y6D8, P43355, B4DLV6
7	GO:0022008	neurogenesis	biological_process	2	H0YGX7, B4DPP0
7	GO:0014889	muscle atrophy	biological_process	1	B7Z4U6
7	GO:0007067	mitosis	biological_process	1	C9J2P0
7	GO:0070665	positive regulation of leukocyte proliferation	biological_process	1	E9PJK1
7	GO:0043269	regulation of ion transport	biological_process	3	A0A0D9SG53, O15247, A4UJ43
7	GO:0097190	apoptotic signaling pathway	biological_process	1	B7Z4U6
7	GO:0071407	cellular response to organic cyclic compound	biological_process	1	B4DLV6
7	GO:0006820	anion transport	biological_process	1	Q9HBR0
7	GO:0045934	negative regulation of nucleobase-containing compound metabolic process	biological_process	3	Q9H8M2, A0A087X0Q6, P43355
7	GO:0051960	regulation of nervous system development	biological_process	1	H0YGX7
7	GO:0042113	B cell activation	biological_process	1	E9PJK1
7	GO:0043069	negative regulation of programmed cell death	biological_process	1	B2RA03
7	GO:0097194	execution phase of apoptosis	biological_process	1	B7Z4U6
7	GO:0016485	protein processing	biological_process	2	P15144, Q96B43
7	GO:0006873	cellular ion homeostasis	biological_process	2	O15247, A4UJ43
7	GO:0045088	regulation of innate immune response	biological_process	1	C9J2P0
7	GO:0007219	Notch signaling pathway	biological_process	1	P43355
7	GO:0006259	DNA metabolic process	biological_process	2	A0A024RC76, C9J2P0
7	GO:0051495	positive regulation of cytoskeleton organization	biological_process	1	B7Z4U6
7	GO:0006901	vesicle coating	biological_process	1	B2R8A2
7	GO:0009967	positive regulation of signal transduction	biological_process	4	E9PJK1, D3DSV0, B2R8A2, P26447
7	GO:0044784	metaphase/anaphase transition of cell cycle	biological_process	1	C9J2P0
7	GO:0046365	monosaccharide catabolic process	biological_process	2	P07205, B4DH89
7	GO:0048534	hematopoietic or lymphoid organ development	biological_process	1	A0A087X0Q6
7	GO:0006576	cellular biogenic amine metabolic process	biological_process	1	B4DH89
7	GO:0044409	entry into host	biological_process	2	B7Z4U6, E9PJK1
7	GO:0006665	sphingolipid metabolic process	biological_process	1	Q8NFR3
7	GO:0060485	mesenchyme development	biological_process	1	P26447
7	GO:0051146	striated muscle cell differentiation	biological_process	1	P08727
7	GO:0043009	chordate embryonic development	biological_process	1	B4DH89
7	GO:0032410	negative regulation of transporter activity	biological_process	1	O15247
7	GO:0010558	negative regulation of macromolecule biosynthetic process	biological_process	4	Q9H8M2, A0A087X0Q6, Q06787, P43355
7	GO:0019220	regulation of phosphate metabolic process	biological_process	3	E9PJK1, D3DSV0, A4UJ43
7	GO:0006941	striated muscle contraction	biological_process	1	O15247
7	GO:0072001	renal system development	biological_process	2	Q7Z443, Q59H46
7	GO:0007034	vacuolar transport	biological_process	1	Q9UJC3
7	GO:0060284	regulation of cell development	biological_process	2	H0YGX7, A0A024RDE8
7	GO:0043627	response to estrogen stimulus	biological_process	2	P08727, A4UJ43
7	GO:0042967	acyl-carrier-protein biosynthetic process	biological_process	2	Q99536, Q8NFR3
7	GO:0060047	heart contraction	biological_process	1	O15247
7	GO:0030168	platelet activation	biological_process	2	B4DPP0, B4DVJ1
7	GO:0016568	chromatin modification	biological_process	2	Q9H8M2, C9J2P0
7	GO:0031032	actomyosin structure organization	biological_process	1	P08727
7	GO:0044772	mitotic cell cycle phase transition	biological_process	2	A0A0D9SG53, C9J2P0
7	GO:0000279	M phase	biological_process	1	C9J2P0
7	GO:0006721	terpenoid metabolic process	biological_process	1	B4DH89
7	GO:2000648	positive regulation of stem cell proliferation	biological_process	1	P16422
7	GO:0048568	embryonic organ development	biological_process	1	B4DH89
7	GO:0043171	peptide catabolic process	biological_process	1	P15144
7	GO:0008210	estrogen metabolic process	biological_process	1	P37059
7	GO:0048858	cell projection morphogenesis	biological_process	2	H0YGX7, B7Z4U6
7	GO:0022408	negative regulation of cell-cell adhesion	biological_process	1	P16422
7	GO:0045930	negative regulation of mitotic cell cycle	biological_process	1	A0A0D9SG53
7	GO:0045026	plasma membrane fusion	biological_process	1	B4DPP0
7	GO:0007229	integrin-mediated signaling pathway	biological_process	1	Q59H46
7	GO:0045109	intermediate filament organization	biological_process	1	P08727
7	GO:0048864	stem cell development	biological_process	1	P26447
7	GO:0030866	cortical actin cytoskeleton organization	biological_process	1	B3KUB6
7	GO:0071482	cellular response to light stimulus	biological_process	1	Q96B43
7	GO:0051248	negative regulation of protein metabolic process	biological_process	2	P43355, Q06787
7	GO:0050900	leukocyte migration	biological_process	1	Q96DZ4
7	GO:0000904	cell morphogenesis involved in differentiation	biological_process	3	H0YGX7, A0A024RDE8, P26447
7	GO:0030574	collagen catabolic process	biological_process	1	Q96DZ4
7	GO:0008207	C21-steroid hormone metabolic process	biological_process	1	P37059
7	GO:0042981	regulation of apoptotic process	biological_process	3	B7Z4U6, B2RA03, Q05DN2
7	GO:0002064	epithelial cell development	biological_process	1	A4UJ43
7	GO:0051650	establishment of vesicle localization	biological_process	1	B2R8A2
7	GO:0019752	carboxylic acid metabolic process	biological_process	7	B4DH89, G3V2R9, Q99536, B4DVJ1, C9JSQ1, O15247, A4UJ43
7	GO:0006812	cation transport	biological_process	5	A0A0D9SG53, O15247, A4UJ43, Q7Z443, Q9HBR0
7	GO:0022604	regulation of cell morphogenesis	biological_process	2	H0YGX7, A0A024RDE8
7	GO:0007007	inner mitochondrial membrane organization	biological_process	1	C9J406
7	GO:0043623	cellular protein complex assembly	biological_process	2	B7Z4U6, B4DU58
7	GO:0007602	phototransduction	biological_process	1	Q96B43
7	GO:0032386	regulation of intracellular transport	biological_process	4	D3DSV0, Q8IVQ8, O15247, A4UJ43
7	GO:0006886	intracellular protein transport	biological_process	5	B2RA03, B8ZZZ1, D3DSV0, Q8IVQ8, B2R8A2
7	GO:0010557	positive regulation of macromolecule biosynthetic process	biological_process	5	E9PJK1, P16422, D3DSV0, Q9H8M2, A0A087X0Q6
7	GO:0010562	positive regulation of phosphorus metabolic process	biological_process	2	E9PJK1, D3DSV0
7	GO:0052547	regulation of peptidase activity	biological_process	1	B7Z4U6
7	GO:0006412	translation	biological_process	1	Q06787
7	GO:0016482	cytoplasmic transport	biological_process	7	B2R8A2, B2RA03, Q9UJC3, D3DSV0, Q8IVQ8, O15247, A4UJ43
7	GO:0036230	granulocyte activation	biological_process	1	D6RA82
7	GO:0071345	cellular response to cytokine stimulus	biological_process	3	Q05DN2, A0A024RC76, C9J2P0
7	GO:0035878	nail development	biological_process	1	Q59H46
7	GO:0051806	entry into cell of other organism involved in symbiotic interaction	biological_process	2	B7Z4U6, E9PJK1
7	GO:0046467	membrane lipid biosynthetic process	biological_process	1	Q8NFR3
7	GO:0016197	endosomal transport	biological_process	2	B2R8A2, Q9UJC3
7	GO:0032956	regulation of actin cytoskeleton organization	biological_process	2	B7Z4U6, B4DU58
7	GO:0051494	negative regulation of cytoskeleton organization	biological_process	2	B7Z4U6, B4DU58
7	GO:0007422	peripheral nervous system development	biological_process	1	A4UJ43
7	GO:0034220	ion transmembrane transport	biological_process	4	Q9HBR0, A0A0D9SG53, O15247, A4UJ43
7	GO:2000147	positive regulation of cell motility	biological_process	1	D6RA82
7	GO:0043624	cellular protein complex disassembly	biological_process	2	B4DU58, B7Z4U6
7	GO:2000146	negative regulation of cell motility	biological_process	2	H0YGX7, P08727
7	GO:0023019	signal transduction involved in regulation of gene expression	biological_process	1	P16422
8	GO:0043242	negative regulation of protein complex disassembly	biological_process	2	B4DU58, B7Z4U6
8	GO:0032020	ISG15-protein conjugation	biological_process	1	C9J2P0
8	GO:0006401	RNA catabolic process	biological_process	1	A0A024RC76
8	GO:0032388	positive regulation of intracellular transport	biological_process	2	D3DSV0, Q8IVQ8
8	GO:0010769	regulation of cell morphogenesis involved in differentiation	biological_process	2	H0YGX7, A0A024RDE8
8	GO:0018193	peptidyl-amino acid modification	biological_process	4	Q9H8M2, Q96B43, E9PJK1, B4E200
8	GO:0060048	cardiac muscle contraction	biological_process	1	O15247
8	GO:0008544	epidermis development	biological_process	2	O15247, P08727
8	GO:0051252	regulation of RNA metabolic process	biological_process	13	E9PJK1, P16422, D3DSV0, A0A024RC76, Q9H8M2, A0A087X0Q6, D6RA82, P43355, P55795, C9J2P0, A0A0D9SG53, A0A087WXU6, H0Y6D8
8	GO:0002757	immune response-activating signal transduction	biological_process	1	C9J2P0
8	GO:0008154	actin polymerization or depolymerization	biological_process	2	B7Z4U6, B4DU58
8	GO:0006690	icosanoid metabolic process	biological_process	2	G3V2R9, B4DVJ1
8	GO:0010627	regulation of intracellular protein kinase cascade	biological_process	3	E9PJK1, B2R8A2, P26447
8	GO:0003254	regulation of membrane depolarization	biological_process	1	A0A0D9SG53
8	GO:0044794	positive regulation by host of viral process	biological_process	1	B4E200
8	GO:0050909	sensory perception of taste	biological_process	1	Q7Z443
8	GO:0043065	positive regulation of apoptotic process	biological_process	2	B7Z4U6, Q05DN2
8	GO:0060271	cilium morphogenesis	biological_process	1	B7Z4U6
8	GO:0090527	actin filament reorganization	biological_process	1	B7Z4U6
8	GO:0006921	cellular component disassembly involved in execution phase of apoptosis	biological_process	1	B7Z4U6
8	GO:0006308	DNA catabolic process	biological_process	1	A0A024RC76
8	GO:0042325	regulation of phosphorylation	biological_process	3	E9PJK1, D3DSV0, A4UJ43
8	GO:0006458	'de novo' protein folding	biological_process	1	Q2TU64
8	GO:0034765	regulation of ion transmembrane transport	biological_process	3	A0A0D9SG53, O15247, A4UJ43
8	GO:0045110	intermediate filament bundle assembly	biological_process	1	P08727
8	GO:0030001	metal ion transport	biological_process	4	A0A0D9SG53, O15247, A4UJ43, Q7Z443
8	GO:0055002	striated muscle cell development	biological_process	1	P08727
8	GO:0030148	sphingolipid biosynthetic process	biological_process	1	Q8NFR3
8	GO:2000047	regulation of cell-cell adhesion mediated by cadherin	biological_process	1	P16422
8	GO:0031365	N-terminal protein amino acid modification	biological_process	1	Q96B43
8	GO:0016458	gene silencing	biological_process	1	B4DLV6
8	GO:1901988	negative regulation of cell cycle phase transition	biological_process	2	A0A0D9SG53, C9J2P0
8	GO:0046394	carboxylic acid biosynthetic process	biological_process	2	B4DH89, Q99536
8	GO:0007603	phototransduction, visible light	biological_process	1	Q96B43
8	GO:0006605	protein targeting	biological_process	2	B8ZZZ1, D3DSV0
8	GO:0003073	regulation of systemic arterial blood pressure	biological_process	1	P15144
8	GO:0072659	protein localization to plasma membrane	biological_process	1	B2RA03
8	GO:0007265	Ras protein signal transduction	biological_process	1	H0YGX7
8	GO:0019062	viral attachment to host cell	biological_process	1	E9PJK1
8	GO:0090501	RNA phosphodiester bond hydrolysis	biological_process	1	A0A024RC76
8	GO:0072507	divalent inorganic cation homeostasis	biological_process	2	O15247, A4UJ43
8	GO:0001944	vasculature development	biological_process	1	D6RA82
8	GO:1902099	regulation of metaphase/anaphase transition of cell cycle	biological_process	1	C9J2P0
8	GO:0032459	regulation of protein oligomerization	biological_process	1	Q96DZ4
8	GO:0006892	post-Golgi vesicle-mediated transport	biological_process	1	B2RA03
8	GO:0071357	cellular response to type I interferon	biological_process	2	Q05DN2, A0A024RC76
8	GO:0014891	striated muscle atrophy	biological_process	1	B7Z4U6
8	GO:0051322	anaphase	biological_process	1	C9J2P0
8	GO:0033157	regulation of intracellular protein transport	biological_process	2	D3DSV0, Q8IVQ8
8	GO:0045089	positive regulation of innate immune response	biological_process	1	C9J2P0
8	GO:0001704	formation of primary germ layer	biological_process	1	Q59H46
8	GO:0051784	negative regulation of nuclear division	biological_process	1	C9J2P0
8	GO:0090150	establishment of protein localization to membrane	biological_process	1	B2RA03
8	GO:0050670	regulation of lymphocyte proliferation	biological_process	1	E9PJK1
8	GO:0061450	trophoblast cell migration	biological_process	1	H0YGX7
8	GO:1901990	regulation of mitotic cell cycle phase transition	biological_process	2	A0A0D9SG53, C9J2P0
8	GO:0052548	regulation of endopeptidase activity	biological_process	1	B7Z4U6
8	GO:0045069	regulation of viral genome replication	biological_process	2	A0A024RC76, B4E200
8	GO:0001822	kidney development	biological_process	1	Q7Z443
8	GO:0016101	diterpenoid metabolic process	biological_process	1	B4DH89
8	GO:0046395	carboxylic acid catabolic process	biological_process	1	B4DH89
8	GO:0043270	positive regulation of ion transport	biological_process	1	A0A0D9SG53
8	GO:0045937	positive regulation of phosphate metabolic process	biological_process	2	E9PJK1, D3DSV0
8	GO:0030336	negative regulation of cell migration	biological_process	2	H0YGX7, P08727
8	GO:0001885	endothelial cell development	biological_process	1	A4UJ43
8	GO:0007249	I-kappaB kinase/NF-kappaB cascade	biological_process	2	B2R8A2, P26447
8	GO:0000086	G2/M transition of mitotic cell cycle	biological_process	1	A0A0D9SG53
8	GO:0008593	regulation of Notch signaling pathway	biological_process	1	P43355
8	GO:0051056	regulation of small GTPase mediated signal transduction	biological_process	1	H0YGX7
8	GO:0071801	regulation of podosome assembly	biological_process	2	B4DU58, B7Z4U6
8	GO:0032527	protein exit from endoplasmic reticulum	biological_process	1	B2R8A2
8	GO:0043543	protein acylation	biological_process	1	Q9H8M2
8	GO:0048762	mesenchymal cell differentiation	biological_process	1	P26447
8	GO:0042147	retrograde transport, endosome to Golgi	biological_process	1	B2R8A2
8	GO:0016071	mRNA metabolic process	biological_process	2	P55795, D3DSV0
8	GO:0051222	positive regulation of protein transport	biological_process	2	D3DSV0, Q8IVQ8
8	GO:0006687	glycosphingolipid metabolic process	biological_process	1	Q8NFR3
8	GO:0032774	RNA biosynthetic process	biological_process	11	E9PJK1, P16422, D3DSV0, Q9H8M2, A0A087X0Q6, D6RA82, P43355, H0Y6D8, C9J2P0, A0A0D9SG53, A0A087WXU6
8	GO:0006586	indolalkylamine metabolic process	biological_process	1	B4DH89
8	GO:0033633	negative regulation of cell-cell adhesion mediated by integrin	biological_process	1	P16422
8	GO:2000113	negative regulation of cellular macromolecule biosynthetic process	biological_process	4	Q9H8M2, A0A087X0Q6, Q06787, P43355
8	GO:0048699	generation of neurons	biological_process	1	H0YGX7
8	GO:0042197	halogenated hydrocarbon metabolic process	biological_process	1	B4DH89
8	GO:0050864	regulation of B cell activation	biological_process	1	E9PJK1
8	GO:0072511	divalent inorganic cation transport	biological_process	2	O15247, A4UJ43
8	GO:0031333	negative regulation of protein complex assembly	biological_process	2	B7Z4U6, B4DU58
8	GO:0045022	early endosome to late endosome transport	biological_process	1	Q9UJC3
8	GO:0042100	B cell proliferation	biological_process	1	E9PJK1
8	GO:0043692	monoterpene metabolic process	biological_process	1	B4DH89
8	GO:0007088	regulation of mitosis	biological_process	1	C9J2P0
8	GO:0031399	regulation of protein modification process	biological_process	6	E9PJK1, D3DSV0, C9J2P0, A4UJ43, Q9H8M2, P43355
8	GO:0019722	calcium-mediated signaling	biological_process	1	O15247
8	GO:0070647	protein modification by small protein conjugation or removal	biological_process	1	C9J2P0
8	GO:0007091	metaphase/anaphase transition of mitotic cell cycle	biological_process	1	C9J2P0
8	GO:0071173	spindle assembly checkpoint	biological_process	1	C9J2P0
8	GO:0006903	vesicle targeting	biological_process	1	B2R8A2
8	GO:0046247	terpene catabolic process	biological_process	1	B4DH89
8	GO:0006887	exocytosis	biological_process	2	D6RA82, B4DPP0
8	GO:0042063	gliogenesis	biological_process	1	B4DPP0
8	GO:0051258	protein polymerization	biological_process	2	B7Z4U6, B4DU58
8	GO:0006468	protein phosphorylation	biological_process	3	E9PJK1, D3DSV0, A4UJ43
8	GO:0022898	regulation of transmembrane transporter activity	biological_process	3	A0A0D9SG53, O15247, A4UJ43
8	GO:0006520	cellular amino acid metabolic process	biological_process	4	B4DH89, C9JSQ1, O15247, A4UJ43
8	GO:0042476	odontogenesis	biological_process	1	Q59H46
8	GO:0051261	protein depolymerization	biological_process	2	B4DU58, B7Z4U6
8	GO:0008277	regulation of G-protein coupled receptor protein signaling pathway	biological_process	1	Q96B43
8	GO:0097283	keratinocyte apoptotic process	biological_process	1	B7Z4U6
8	GO:0006913	nucleocytoplasmic transport	biological_process	2	D3DSV0, Q8IVQ8
8	GO:0006396	RNA processing	biological_process	3	P55795, D3DSV0, B4DLV6
8	GO:0008016	regulation of heart contraction	biological_process	1	O15247
8	GO:0032787	monocarboxylic acid metabolic process	biological_process	4	B4DH89, G3V2R9, Q99536, B4DVJ1
8	GO:0007342	fusion of sperm to egg plasma membrane	biological_process	1	B4DPP0
8	GO:0097284	hepatocyte apoptotic process	biological_process	1	B7Z4U6
8	GO:0030003	cellular cation homeostasis	biological_process	2	O15247, A4UJ43
8	GO:0006417	regulation of translation	biological_process	1	Q06787
8	GO:0030097	hemopoiesis	biological_process	1	A0A087X0Q6
8	GO:0021915	neural tube development	biological_process	1	B4DH89
8	GO:0019852	L-ascorbic acid metabolic process	biological_process	1	B4DH89
8	GO:0019319	hexose biosynthetic process	biological_process	2	P07205, B4DH89
8	GO:0031334	positive regulation of protein complex assembly	biological_process	3	B7Z4U6, B4DU58, Q96DZ4
8	GO:0042178	xenobiotic catabolic process	biological_process	2	A4UJ43, B4DH89
8	GO:0031647	regulation of protein stability	biological_process	2	B7Z4U6, E9PJK1
8	GO:0010635	regulation of mitochondrial fusion	biological_process	1	Q99536
8	GO:0007041	lysosomal transport	biological_process	1	Q9UJC3
8	GO:0035457	cellular response to interferon-alpha	biological_process	1	Q05DN2
8	GO:0032270	positive regulation of cellular protein metabolic process	biological_process	4	Q9H8M2, E9PJK1, D3DSV0, C9J2P0
8	GO:0055065	metal ion homeostasis	biological_process	2	O15247, A4UJ43
8	GO:0006942	regulation of striated muscle contraction	biological_process	1	O15247
8	GO:0072665	protein localization to vacuole	biological_process	1	E9PJK1
8	GO:0015711	organic anion transport	biological_process	1	Q9HBR0
8	GO:0051329	interphase of mitotic cell cycle	biological_process	2	A0A0D9SG53, C9J2P0
8	GO:0016486	peptide hormone processing	biological_process	1	P15144
8	GO:0030832	regulation of actin filament length	biological_process	2	B7Z4U6, B4DU58
8	GO:0042119	neutrophil activation	biological_process	1	D6RA82
8	GO:0016569	covalent chromatin modification	biological_process	2	Q9H8M2, C9J2P0
8	GO:0043066	negative regulation of apoptotic process	biological_process	1	B2RA03
8	GO:0048194	Golgi vesicle budding	biological_process	1	B2R8A2
8	GO:0032946	positive regulation of mononuclear cell proliferation	biological_process	1	E9PJK1
8	GO:0032269	negative regulation of cellular protein metabolic process	biological_process	2	P43355, Q06787
8	GO:0007178	transmembrane receptor protein serine/threonine kinase signaling pathway	biological_process	1	D3DSV0
8	GO:0019221	cytokine-mediated signaling pathway	biological_process	3	Q05DN2, A0A024RC76, C9J2P0
8	GO:0010631	epithelial cell migration	biological_process	2	D6RA82, P25815
8	GO:1901989	positive regulation of cell cycle phase transition	biological_process	1	C9J2P0
8	GO:0030335	positive regulation of cell migration	biological_process	1	D6RA82
8	GO:0019320	hexose catabolic process	biological_process	2	P07205, B4DH89
8	GO:0071359	cellular response to dsRNA	biological_process	1	B4DLV6
8	GO:0010952	positive regulation of peptidase activity	biological_process	1	B7Z4U6
8	GO:0015672	monovalent inorganic cation transport	biological_process	1	A0A0D9SG53
8	GO:0042407	cristae formation	biological_process	1	C9J406
8	GO:0007272	ensheathment of neurons	biological_process	1	B4DPP0
8	GO:0006006	glucose metabolic process	biological_process	2	P07205, B4DH89
8	GO:2001233	regulation of apoptotic signaling pathway	biological_process	1	B7Z4U6
8	GO:0072594	establishment of protein localization to organelle	biological_process	1	D3DSV0
8	GO:0030260	entry into host cell	biological_process	2	B7Z4U6, E9PJK1
8	GO:0000165	MAPK cascade	biological_process	1	E9PJK1
8	GO:0034504	protein localization to nucleus	biological_process	1	D3DSV0
8	GO:0051251	positive regulation of lymphocyte activation	biological_process	1	E9PJK1
9	GO:0050915	sensory perception of sour taste	biological_process	1	Q7Z443
9	GO:0010389	regulation of G2/M transition of mitotic cell cycle	biological_process	1	A0A0D9SG53
9	GO:0000090	mitotic anaphase	biological_process	1	C9J2P0
9	GO:0006094	gluconeogenesis	biological_process	2	P07205, B4DH89
9	GO:0009081	branched-chain amino acid metabolic process	biological_process	1	B4DH89
9	GO:0090316	positive regulation of intracellular protein transport	biological_process	2	D3DSV0, Q8IVQ8
9	GO:0045839	negative regulation of mitosis	biological_process	1	C9J2P0
9	GO:0010950	positive regulation of endopeptidase activity	biological_process	1	B7Z4U6
9	GO:0042475	odontogenesis of dentin-containing tooth	biological_process	1	Q59H46
9	GO:0016441	posttranscriptional gene silencing	biological_process	1	B4DLV6
9	GO:0014031	mesenchymal cell development	biological_process	1	P26447
9	GO:0043694	monoterpene catabolic process	biological_process	1	B4DH89
9	GO:1901342	regulation of vasculature development	biological_process	1	D6RA82
9	GO:0006631	fatty acid metabolic process	biological_process	4	G3V2R9, Q99536, B4DH89, B4DVJ1
9	GO:0017148	negative regulation of translation	biological_process	1	Q06787
9	GO:0010740	positive regulation of intracellular protein kinase cascade	biological_process	3	E9PJK1, B2R8A2, P26447
9	GO:0046822	regulation of nucleocytoplasmic transport	biological_process	2	D3DSV0, Q8IVQ8
9	GO:0090092	regulation of transmembrane receptor protein serine/threonine kinase signaling pathway	biological_process	1	D3DSV0
9	GO:0002218	activation of innate immune response	biological_process	1	C9J2P0
9	GO:0008206	bile acid metabolic process	biological_process	1	B4DH89
9	GO:0002576	platelet degranulation	biological_process	1	B4DPP0
9	GO:0055074	calcium ion homeostasis	biological_process	2	O15247, A4UJ43
9	GO:0010637	negative regulation of mitochondrial fusion	biological_process	1	Q99536
9	GO:1901991	negative regulation of mitotic cell cycle phase transition	biological_process	2	A0A0D9SG53, C9J2P0
9	GO:0043542	endothelial cell migration	biological_process	2	D6RA82, P25815
9	GO:2000048	negative regulation of cell-cell adhesion mediated by cadherin	biological_process	1	P16422
9	GO:0018212	peptidyl-tyrosine modification	biological_process	1	E9PJK1
9	GO:0050767	regulation of neurogenesis	biological_process	1	H0YGX7
9	GO:0001932	regulation of protein phosphorylation	biological_process	3	E9PJK1, D3DSV0, A4UJ43
9	GO:0006893	Golgi to plasma membrane transport	biological_process	1	B2RA03
9	GO:0009913	epidermal cell differentiation	biological_process	1	O15247
9	GO:0010959	regulation of metal ion transport	biological_process	3	A0A0D9SG53, O15247, A4UJ43
9	GO:0048199	vesicle targeting, to, from or within Golgi	biological_process	1	B2R8A2
9	GO:0045055	regulated secretory pathway	biological_process	1	D6RA82
9	GO:0018208	peptidyl-proline modification	biological_process	1	B4E200
9	GO:1901605	alpha-amino acid metabolic process	biological_process	2	B4DH89, C9JSQ1
9	GO:0006473	protein acetylation	biological_process	1	Q9H8M2
9	GO:1902100	negative regulation of metaphase/anaphase transition of cell cycle	biological_process	1	C9J2P0
9	GO:0030041	actin filament polymerization	biological_process	2	B7Z4U6, B4DU58
9	GO:0031648	protein destabilization	biological_process	1	B7Z4U6
9	GO:1901163	regulation of trophoblast cell migration	biological_process	1	H0YGX7
9	GO:0032461	positive regulation of protein oligomerization	biological_process	1	Q96DZ4
9	GO:0045746	negative regulation of Notch signaling pathway	biological_process	1	P43355
9	GO:1900180	regulation of protein localization to nucleus	biological_process	1	D3DSV0
9	GO:0070838	divalent metal ion transport	biological_process	2	O15247, A4UJ43
9	GO:0043408	regulation of MAPK cascade	biological_process	1	E9PJK1
9	GO:0090503	RNA phosphodiester bond hydrolysis, exonucleolytic	biological_process	1	A0A024RC76
9	GO:0051170	nuclear import	biological_process	1	D3DSV0
9	GO:0031047	gene silencing by RNA	biological_process	1	B4DLV6
9	GO:0090002	establishment of protein localization to plasma membrane	biological_process	1	B2RA03
9	GO:0071803	positive regulation of podosome assembly	biological_process	1	B4DU58
9	GO:0006351	transcription, DNA-dependent	biological_process	11	E9PJK1, P16422, D3DSV0, Q9H8M2, A0A087X0Q6, D6RA82, P43355, H0Y6D8, C9J2P0, A0A0D9SG53, A0A087WXU6
9	GO:0051084	'de novo' posttranslational protein folding	biological_process	1	Q2TU64
9	GO:0006397	mRNA processing	biological_process	2	P55795, D3DSV0
9	GO:0001568	blood vessel development	biological_process	1	D6RA82
9	GO:0032446	protein modification by small protein conjugation	biological_process	1	C9J2P0
9	GO:2000116	regulation of cysteine-type endopeptidase activity	biological_process	1	B7Z4U6
9	GO:0045071	negative regulation of viral genome replication	biological_process	1	A0A024RC76
9	GO:0009072	aromatic amino acid family metabolic process	biological_process	1	B4DH89
9	GO:0006007	glucose catabolic process	biological_process	2	P07205, B4DH89
9	GO:0006813	potassium ion transport	biological_process	1	A0A0D9SG53
9	GO:2001141	regulation of RNA biosynthetic process	biological_process	11	E9PJK1, P16422, D3DSV0, Q9H8M2, A0A087X0Q6, D6RA82, P43355, C9J2P0, A0A0D9SG53, A0A087WXU6, H0Y6D8
9	GO:0050871	positive regulation of B cell activation	biological_process	1	E9PJK1
9	GO:0030888	regulation of B cell proliferation	biological_process	1	E9PJK1
9	GO:0044744	protein targeting to nucleus	biological_process	1	D3DSV0
9	GO:0072503	cellular divalent inorganic cation homeostasis	biological_process	2	O15247, A4UJ43
9	GO:0043549	regulation of kinase activity	biological_process	1	E9PJK1
9	GO:0060337	type I interferon-mediated signaling pathway	biological_process	2	Q05DN2, A0A024RC76
9	GO:0046718	viral entry into host cell	biological_process	2	B7Z4U6, E9PJK1
9	GO:0003044	regulation of systemic arterial blood pressure mediated by a chemical signal	biological_process	1	P15144
9	GO:0018205	peptidyl-lysine modification	biological_process	1	Q9H8M2
9	GO:0006575	cellular modified amino acid metabolic process	biological_process	3	C9JSQ1, O15247, A4UJ43
9	GO:0043122	regulation of I-kappaB kinase/NF-kappaB cascade	biological_process	2	B2R8A2, P26447
9	GO:0034498	early endosome to Golgi transport	biological_process	1	B2R8A2
9	GO:0030182	neuron differentiation	biological_process	1	H0YGX7
9	GO:0032271	regulation of protein polymerization	biological_process	2	B7Z4U6, B4DU58
9	GO:1901879	regulation of protein depolymerization	biological_process	2	B4DU58, B7Z4U6
9	GO:0050671	positive regulation of lymphocyte proliferation	biological_process	1	E9PJK1
9	GO:0032412	regulation of ion transmembrane transporter activity	biological_process	3	A0A0D9SG53, O15247, A4UJ43
9	GO:0008065	establishment of blood-nerve barrier	biological_process	1	A4UJ43
9	GO:0042196	chlorinated hydrocarbon metabolic process	biological_process	1	B4DH89
9	GO:0002283	neutrophil activation involved in immune response	biological_process	1	D6RA82
9	GO:0051254	positive regulation of RNA metabolic process	biological_process	5	E9PJK1, P16422, D3DSV0, Q9H8M2, A0A087X0Q6
9	GO:0045070	positive regulation of viral genome replication	biological_process	1	B4E200
9	GO:0031050	dsRNA fragmentation	biological_process	1	B4DLV6
9	GO:0010001	glial cell differentiation	biological_process	1	B4DPP0
9	GO:0016570	histone modification	biological_process	2	Q9H8M2, C9J2P0
9	GO:0018206	peptidyl-methionine modification	biological_process	1	Q96B43
9	GO:0031401	positive regulation of protein modification process	biological_process	3	E9PJK1, D3DSV0, C9J2P0
9	GO:0001656	metanephros development	biological_process	1	Q7Z443
9	GO:0008333	endosome to lysosome transport	biological_process	1	Q9UJC3
9	GO:0046942	carboxylic acid transport	biological_process	1	Q9HBR0
9	GO:0001523	retinoid metabolic process	biological_process	1	B4DH89
9	GO:0042206	halogenated hydrocarbon catabolic process	biological_process	1	B4DH89
9	GO:0055117	regulation of cardiac muscle contraction	biological_process	1	O15247
9	GO:1902172	regulation of keratinocyte apoptotic process	biological_process	1	B7Z4U6
9	GO:0001707	mesoderm formation	biological_process	1	Q59H46
9	GO:0019482	beta-alanine metabolic process	biological_process	1	B4DH89
9	GO:0030042	actin filament depolymerization	biological_process	2	B4DU58, B7Z4U6
9	GO:0008366	axon ensheathment	biological_process	1	B4DPP0
9	GO:0008380	RNA splicing	biological_process	2	P55795, D3DSV0
9	GO:0007266	Rho protein signal transduction	biological_process	1	H0YGX7
9	GO:1901992	positive regulation of mitotic cell cycle phase transition	biological_process	1	C9J2P0
9	GO:0006875	cellular metal ion homeostasis	biological_process	2	O15247, A4UJ43
9	GO:0018923	limonene metabolic process	biological_process	1	B4DH89
9	GO:0051168	nuclear export	biological_process	1	Q8IVQ8
9	GO:0051253	negative regulation of RNA metabolic process	biological_process	3	Q9H8M2, A0A087X0Q6, P43355
9	GO:0046813	virion attachment, binding of host cell surface receptor	biological_process	1	E9PJK1
9	GO:0072330	monocarboxylic acid biosynthetic process	biological_process	2	B4DH89, Q99536
9	GO:0000082	G1/S transition of mitotic cell cycle	biological_process	2	A0A0D9SG53, C9J2P0
9	GO:0030071	regulation of mitotic metaphase/anaphase transition	biological_process	1	C9J2P0
9	GO:0000738	DNA catabolic process, exonucleolytic	biological_process	1	A0A024RC76
9	GO:0008064	regulation of actin polymerization or depolymerization	biological_process	2	B7Z4U6, B4DU58
9	GO:0009063	cellular amino acid catabolic process	biological_process	1	B4DH89
9	GO:0061462	protein localization to lysosome	biological_process	1	E9PJK1
9	GO:0030239	myofibril assembly	biological_process	1	P08727
9	GO:0010632	regulation of epithelial cell migration	biological_process	1	D6RA82
9	GO:0060389	pathway-restricted SMAD protein phosphorylation	biological_process	1	D3DSV0
9	GO:0042327	positive regulation of phosphorylation	biological_process	2	E9PJK1, D3DSV0
9	GO:0016056	rhodopsin mediated signaling pathway	biological_process	1	Q96B43
10	GO:0048666	neuron development	biological_process	1	H0YGX7
10	GO:0048200	Golgi transport vesicle coating	biological_process	1	B2R8A2
10	GO:0046251	limonene catabolic process	biological_process	1	B4DH89
10	GO:0043266	regulation of potassium ion transport	biological_process	1	A0A0D9SG53
10	GO:0043550	regulation of lipid kinase activity	biological_process	1	E9PJK1
10	GO:0097186	amelogenesis	biological_process	1	Q59H46
10	GO:0006360	transcription from RNA polymerase I promoter	biological_process	1	H0Y6D8
10	GO:0001837	epithelial to mesenchymal transition	biological_process	1	P26447
10	GO:0006568	tryptophan metabolic process	biological_process	1	B4DH89
10	GO:0018108	peptidyl-tyrosine phosphorylation	biological_process	1	E9PJK1
10	GO:0010882	regulation of cardiac muscle contraction by calcium ion signaling	biological_process	1	O15247
10	GO:0042205	chlorinated hydrocarbon catabolic process	biological_process	1	B4DH89
10	GO:0006383	transcription from RNA polymerase III promoter	biological_process	1	H0Y6D8
10	GO:0030834	regulation of actin filament depolymerization	biological_process	2	B4DU58, B7Z4U6
10	GO:1902221	erythrose 4-phosphate/phosphoenolpyruvate family amino acid metabolic process	biological_process	1	B4DH89
10	GO:0009066	aspartate family amino acid metabolic process	biological_process	1	B4DH89
10	GO:0043123	positive regulation of I-kappaB kinase/NF-kappaB cascade	biological_process	2	B2R8A2, P26447
10	GO:0006352	DNA-dependent transcription, initiation	biological_process	1	H0Y6D8
10	GO:0010634	positive regulation of epithelial cell migration	biological_process	1	D6RA82
10	GO:2001056	positive regulation of cysteine-type endopeptidase activity	biological_process	1	B7Z4U6
10	GO:0000413	protein peptidyl-prolyl isomerization	biological_process	1	B4E200
10	GO:0006600	creatine metabolic process	biological_process	1	C9JSQ1
10	GO:0035194	posttranscriptional gene silencing by RNA	biological_process	1	B4DLV6
10	GO:0006633	fatty acid biosynthetic process	biological_process	1	Q99536
10	GO:0048333	mesodermal cell differentiation	biological_process	1	Q59H46
10	GO:0009064	glutamine family amino acid metabolic process	biological_process	2	B4DH89, C9JSQ1
10	GO:0071804	cellular potassium ion transport	biological_process	1	A0A0D9SG53
10	GO:0006874	cellular calcium ion homeostasis	biological_process	2	O15247, A4UJ43
10	GO:0032273	positive regulation of protein polymerization	biological_process	1	B7Z4U6
10	GO:0006570	tyrosine metabolic process	biological_process	1	B4DH89
10	GO:0001934	positive regulation of protein phosphorylation	biological_process	2	E9PJK1, D3DSV0
10	GO:0006551	leucine metabolic process	biological_process	1	B4DH89
10	GO:0045841	negative regulation of mitotic metaphase/anaphase transition	biological_process	1	C9J2P0
10	GO:0002758	innate immune response-activating signal transduction	biological_process	1	C9J2P0
10	GO:2000045	regulation of G1/S transition of mitotic cell cycle	biological_process	2	A0A0D9SG53, C9J2P0
10	GO:0033674	positive regulation of kinase activity	biological_process	1	E9PJK1
10	GO:0006573	valine metabolic process	biological_process	1	B4DH89
10	GO:0001990	regulation of systemic arterial blood pressure by hormone	biological_process	1	P15144
10	GO:0042574	retinal metabolic process	biological_process	1	B4DH89
10	GO:0006606	protein import into nucleus	biological_process	1	D3DSV0
10	GO:0030890	positive regulation of B cell proliferation	biological_process	1	E9PJK1
10	GO:0043001	Golgi to plasma membrane protein transport	biological_process	1	B2RA03
10	GO:0007093	mitotic cell cycle checkpoint	biological_process	1	C9J2P0
10	GO:0043299	leukocyte degranulation	biological_process	1	D6RA82
10	GO:0043484	regulation of RNA splicing	biological_process	1	P55795
10	GO:0006865	amino acid transport	biological_process	1	Q9HBR0
10	GO:0032272	negative regulation of protein polymerization	biological_process	2	B7Z4U6, B4DU58
10	GO:0009083	branched-chain amino acid catabolic process	biological_process	1	B4DH89
10	GO:1902174	positive regulation of keratinocyte apoptotic process	biological_process	1	B7Z4U6
10	GO:0018394	peptidyl-lysine acetylation	biological_process	1	Q9H8M2
10	GO:0010972	negative regulation of G2/M transition of mitotic cell cycle	biological_process	1	A0A0D9SG53
10	GO:0006749	glutathione metabolic process	biological_process	2	O15247, A4UJ43
10	GO:0046596	regulation of viral entry into host cell	biological_process	1	B7Z4U6
10	GO:0032413	negative regulation of ion transmembrane transporter activity	biological_process	1	O15247
10	GO:0006549	isoleucine metabolic process	biological_process	1	B4DH89
10	GO:0006366	transcription from RNA polymerase II promoter	biological_process	6	E9PJK1, P16422, P43355, H0Y6D8, Q9H8M2, A0A087X0Q6
10	GO:0045859	regulation of protein kinase activity	biological_process	1	E9PJK1
10	GO:0000375	RNA splicing, via transesterification reactions	biological_process	2	P55795, D3DSV0
10	GO:2001257	regulation of cation channel activity	biological_process	2	O15247, A4UJ43
10	GO:0090100	positive regulation of transmembrane receptor protein serine/threonine kinase signaling pathway	biological_process	1	D3DSV0
10	GO:0006355	regulation of transcription, DNA-dependent	biological_process	11	E9PJK1, P16422, D3DSV0, Q9H8M2, A0A087X0Q6, D6RA82, P43355, C9J2P0, A0A0D9SG53, A0A087WXU6, H0Y6D8
10	GO:0001676	long-chain fatty acid metabolic process	biological_process	1	B4DVJ1
10	GO:0035964	COPI-coated vesicle budding	biological_process	1	B2R8A2
10	GO:0048514	blood vessel morphogenesis	biological_process	1	D6RA82
10	GO:0070918	production of small RNA involved in gene silencing by RNA	biological_process	1	B4DLV6
10	GO:0033559	unsaturated fatty acid metabolic process	biological_process	2	G3V2R9, B4DVJ1
10	GO:0006816	calcium ion transport	biological_process	2	O15247, A4UJ43
10	GO:0042552	myelination	biological_process	1	B4DPP0
10	GO:0006547	histidine metabolic process	biological_process	1	B4DH89
10	GO:1901880	negative regulation of protein depolymerization	biological_process	2	B4DU58, B7Z4U6
10	GO:0030833	regulation of actin filament polymerization	biological_process	2	B7Z4U6, B4DU58
10	GO:1901606	alpha-amino acid catabolic process	biological_process	1	B4DH89
10	GO:0045214	sarcomere organization	biological_process	1	P08727
10	GO:0022400	regulation of rhodopsin mediated signaling pathway	biological_process	1	Q96B43
10	GO:0018899	1,2-dichloroethane metabolic process	biological_process	1	B4DH89
10	GO:0006699	bile acid biosynthetic process	biological_process	1	B4DH89
10	GO:0060393	regulation of pathway-restricted SMAD protein phosphorylation	biological_process	1	D3DSV0
10	GO:0006611	protein export from nucleus	biological_process	1	Q8IVQ8
10	GO:0046824	positive regulation of nucleocytoplasmic transport	biological_process	2	D3DSV0, Q8IVQ8
10	GO:0043281	regulation of cysteine-type endopeptidase activity involved in apoptotic process	biological_process	1	B7Z4U6
10	GO:0042573	retinoic acid metabolic process	biological_process	1	B4DH89
10	GO:0006475	internal protein amino acid acetylation	biological_process	1	Q9H8M2
10	GO:0045664	regulation of neuron differentiation	biological_process	1	H0YGX7
10	GO:0043410	positive regulation of MAPK cascade	biological_process	1	E9PJK1
10	GO:0010594	regulation of endothelial cell migration	biological_process	1	D6RA82
10	GO:0016567	protein ubiquitination	biological_process	1	C9J2P0
10	GO:1901164	negative regulation of trophoblast cell migration	biological_process	1	H0YGX7
10	GO:0006096	glycolysis	biological_process	2	P07205, B4DH89
11	GO:0019260	1,2-dichloroethane catabolic process	biological_process	1	B4DH89
11	GO:0000377	RNA splicing, via transesterification reactions with bulged adenosine as nucleophile	biological_process	2	P55795, D3DSV0
11	GO:0007184	SMAD protein import into nucleus	biological_process	1	D3DSV0
11	GO:0006513	protein monoubiquitination	biological_process	1	C9J2P0
11	GO:0048667	cell morphogenesis involved in neuron differentiation	biological_process	1	H0YGX7
11	GO:0006550	isoleucine catabolic process	biological_process	1	B4DH89
11	GO:0030838	positive regulation of actin filament polymerization	biological_process	1	B7Z4U6
11	GO:0043268	positive regulation of potassium ion transport	biological_process	1	A0A0D9SG53
11	GO:0051090	regulation of sequence-specific DNA binding transcription factor activity	biological_process	1	D6RA82
11	GO:0031396	regulation of protein ubiquitination	biological_process	1	C9J2P0
11	GO:0000209	protein polyubiquitination	biological_process	1	C9J2P0
11	GO:0030835	negative regulation of actin filament depolymerization	biological_process	2	B4DU58, B7Z4U6
11	GO:0043126	regulation of 1-phosphatidylinositol 4-kinase activity	biological_process	1	E9PJK1
11	GO:0060401	cytosolic calcium ion transport	biological_process	2	O15247, A4UJ43
11	GO:0046825	regulation of protein export from nucleus	biological_process	1	Q8IVQ8
11	GO:0050730	regulation of peptidyl-tyrosine phosphorylation	biological_process	1	E9PJK1
11	GO:0006692	prostanoid metabolic process	biological_process	1	G3V2R9
11	GO:0015807	L-amino acid transport	biological_process	1	Q9HBR0
11	GO:0003081	regulation of systemic arterial blood pressure by renin-angiotensin	biological_process	1	P15144
11	GO:0001525	angiogenesis	biological_process	1	D6RA82
11	GO:0006553	lysine metabolic process	biological_process	1	B4DH89
11	GO:0043312	neutrophil degranulation	biological_process	1	D6RA82
11	GO:0002221	pattern recognition receptor signaling pathway	biological_process	1	C9J2P0
11	GO:0016574	histone ubiquitination	biological_process	1	C9J2P0
11	GO:0006357	regulation of transcription from RNA polymerase II promoter	biological_process	5	E9PJK1, P16422, P43355, Q9H8M2, A0A087X0Q6
11	GO:0006552	leucine catabolic process	biological_process	1	B4DH89
11	GO:2001258	negative regulation of cation channel activity	biological_process	1	O15247
11	GO:0043280	positive regulation of cysteine-type endopeptidase activity involved in apoptotic process	biological_process	1	B7Z4U6
11	GO:0006558	L-phenylalanine metabolic process	biological_process	1	B4DH89
11	GO:0070296	sarcoplasmic reticulum calcium ion transport	biological_process	2	O15247, A4UJ43
11	GO:0048205	COPI coating of Golgi vesicle	biological_process	1	B2R8A2
11	GO:0018393	internal peptidyl-lysine acetylation	biological_process	1	Q9H8M2
11	GO:0009068	aspartate family amino acid catabolic process	biological_process	1	B4DH89
11	GO:0071900	regulation of protein serine/threonine kinase activity	biological_process	1	E9PJK1
11	GO:0043000	Golgi to plasma membrane CFTR protein transport	biological_process	1	B2RA03
11	GO:0045860	positive regulation of protein kinase activity	biological_process	1	E9PJK1
11	GO:1900087	positive regulation of G1/S transition of mitotic cell cycle	biological_process	1	C9J2P0
11	GO:0035195	gene silencing by miRNA	biological_process	1	B4DLV6
11	GO:0045893	positive regulation of transcription, DNA-dependent	biological_process	5	E9PJK1, P16422, D3DSV0, Q9H8M2, A0A087X0Q6
11	GO:0003333	amino acid transmembrane transport	biological_process	1	Q9HBR0
11	GO:0071805	potassium ion transmembrane transport	biological_process	1	A0A0D9SG53
11	GO:0006525	arginine metabolic process	biological_process	2	B4DH89, C9JSQ1
11	GO:0045892	negative regulation of transcription, DNA-dependent	biological_process	3	Q9H8M2, A0A087X0Q6, P43355
11	GO:0019369	arachidonic acid metabolic process	biological_process	1	B4DVJ1
11	GO:0006560	proline metabolic process	biological_process	2	B4DH89, C9JSQ1
11	GO:0051208	sequestering of calcium ion	biological_process	2	O15247, A4UJ43
11	GO:0031175	neuron projection development	biological_process	1	H0YGX7
11	GO:0046597	negative regulation of viral entry into host cell	biological_process	1	B7Z4U6
11	GO:0051480	cytosolic calcium ion homeostasis	biological_process	2	O15247, A4UJ43
11	GO:0006574	valine catabolic process	biological_process	1	B4DH89
11	GO:0042306	regulation of protein import into nucleus	biological_process	1	D3DSV0
11	GO:0010862	positive regulation of pathway-restricted SMAD protein phosphorylation	biological_process	1	D3DSV0
11	GO:0051924	regulation of calcium ion transport	biological_process	2	O15247, A4UJ43
11	GO:2001267	regulation of cysteine-type endopeptidase activity involved in apoptotic signaling pathway	biological_process	1	B7Z4U6
11	GO:0010595	positive regulation of endothelial cell migration	biological_process	1	D6RA82
11	GO:0030837	negative regulation of actin filament polymerization	biological_process	2	B7Z4U6, B4DU58
11	GO:2000134	negative regulation of G1/S transition of mitotic cell cycle	biological_process	1	A0A0D9SG53
11	GO:0071174	mitotic spindle checkpoint	biological_process	1	C9J2P0
11	GO:0090218	positive regulation of lipid kinase activity	biological_process	1	E9PJK1
12	GO:0000398	mRNA splicing, via spliceosome	biological_process	2	P55795, D3DSV0
12	GO:0000122	negative regulation of transcription from RNA polymerase II promoter	biological_process	1	P43355
12	GO:0042989	sequestering of actin monomers	biological_process	1	B7Z4U6
12	GO:0043128	positive regulation of 1-phosphatidylinositol 4-kinase activity	biological_process	1	E9PJK1
12	GO:1901379	regulation of potassium ion transmembrane transport	biological_process	1	A0A0D9SG53
12	GO:0051693	actin filament capping	biological_process	2	B4DU58, B7Z4U6
12	GO:0070936	protein K48-linked ubiquitination	biological_process	1	C9J2P0
12	GO:0043405	regulation of MAP kinase activity	biological_process	1	E9PJK1
12	GO:0006693	prostaglandin metabolic process	biological_process	1	G3V2R9
12	GO:0071902	positive regulation of protein serine/threonine kinase activity	biological_process	1	E9PJK1
12	GO:0070534	protein K63-linked ubiquitination	biological_process	1	C9J2P0
12	GO:0007094	mitotic spindle assembly checkpoint	biological_process	1	C9J2P0
12	GO:0051282	regulation of sequestering of calcium ion	biological_process	2	O15247, A4UJ43
12	GO:0042307	positive regulation of protein import into nucleus	biological_process	1	D3DSV0
12	GO:0016573	histone acetylation	biological_process	1	Q9H8M2
12	GO:0051091	positive regulation of sequence-specific DNA binding transcription factor activity	biological_process	1	D6RA82
12	GO:0070979	protein K11-linked ubiquitination	biological_process	1	C9J2P0
12	GO:0048812	neuron projection morphogenesis	biological_process	1	H0YGX7
12	GO:0007204	elevation of cytosolic calcium ion concentration	biological_process	2	O15247, A4UJ43
12	GO:0001991	regulation of systemic arterial blood pressure by circulatory renin-angiotensin	biological_process	1	P15144
12	GO:0045944	positive regulation of transcription from RNA polymerase II promoter	biological_process	2	E9PJK1, P16422
12	GO:0031398	positive regulation of protein ubiquitination	biological_process	1	C9J2P0
12	GO:0033523	histone H2B ubiquitination	biological_process	1	C9J2P0
12	GO:0010975	regulation of neuron projection development	biological_process	1	H0YGX7
12	GO:0046827	positive regulation of protein export from nucleus	biological_process	1	Q8IVQ8
12	GO:0060390	regulation of SMAD protein import into nucleus	biological_process	1	D3DSV0
12	GO:0045765	regulation of angiogenesis	biological_process	1	D6RA82
12	GO:1901019	regulation of calcium ion transmembrane transporter activity	biological_process	2	O15247, A4UJ43
12	GO:0051438	regulation of ubiquitin-protein ligase activity	biological_process	1	C9J2P0
12	GO:0045010	actin nucleation	biological_process	1	B7Z4U6
12	GO:0032147	activation of protein kinase activity	biological_process	1	E9PJK1
12	GO:2001269	positive regulation of cysteine-type endopeptidase activity involved in apoptotic signaling pathway	biological_process	1	B7Z4U6
12	GO:0035196	production of miRNAs involved in gene silencing by miRNA	biological_process	1	B4DLV6
12	GO:0006554	lysine catabolic process	biological_process	1	B4DH89
12	GO:0010390	histone monoubiquitination	biological_process	1	C9J2P0
12	GO:0002224	toll-like receptor signaling pathway	biological_process	1	C9J2P0
12	GO:0050731	positive regulation of peptidyl-tyrosine phosphorylation	biological_process	1	E9PJK1
12	GO:0061564	axon development	biological_process	1	H0YGX7
13	GO:0043406	positive regulation of MAP kinase activity	biological_process	1	E9PJK1
13	GO:0051016	barbed-end actin filament capping	biological_process	2	B4DU58, B7Z4U6
13	GO:0051125	regulation of actin nucleation	biological_process	1	B7Z4U6
13	GO:1901020	negative regulation of calcium ion transmembrane transporter activity	biological_process	1	O15247
13	GO:0045766	positive regulation of angiogenesis	biological_process	1	D6RA82
13	GO:0060391	positive regulation of SMAD protein import into nucleus	biological_process	1	D3DSV0
13	GO:0051283	negative regulation of sequestering of calcium ion	biological_process	2	O15247, A4UJ43
13	GO:0060314	regulation of ryanodine-sensitive calcium-release channel activity	biological_process	2	O15247, A4UJ43
13	GO:0051443	positive regulation of ubiquitin-protein ligase activity	biological_process	1	C9J2P0
13	GO:0002002	regulation of angiotensin levels in blood	biological_process	1	P15144
13	GO:0051439	regulation of ubiquitin-protein ligase activity involved in mitotic cell cycle	biological_process	1	C9J2P0
13	GO:1901016	regulation of potassium ion transmembrane transporter activity	biological_process	1	A0A0D9SG53
13	GO:0007409	axonogenesis	biological_process	1	H0YGX7
13	GO:0060402	calcium ion transport into cytosol	biological_process	2	O15247, A4UJ43
14	GO:0010522	regulation of calcium ion transport into cytosol	biological_process	2	O15247, A4UJ43
14	GO:0051127	positive regulation of actin nucleation	biological_process	1	B7Z4U6
14	GO:0002003	angiotensin maturation	biological_process	1	P15144
14	GO:0000187	activation of MAPK activity	biological_process	1	E9PJK1
14	GO:0051209	release of sequestered calcium ion into cytosol	biological_process	2	O15247, A4UJ43
14	GO:0050770	regulation of axonogenesis	biological_process	1	H0YGX7
14	GO:0051437	positive regulation of ubiquitin-protein ligase activity involved in mitotic cell cycle	biological_process	1	C9J2P0
14	GO:0060315	negative regulation of ryanodine-sensitive calcium-release channel activity	biological_process	1	O15247
15	GO:0014808	release of sequestered calcium ion into cytosol by sarcoplasmic reticulum	biological_process	2	O15247, A4UJ43
15	GO:0051279	regulation of release of sequestered calcium ion into cytosol	biological_process	2	O15247, A4UJ43
16	GO:0010880	regulation of release of sequestered calcium ion into cytosol by sarcoplasmic reticulum	biological_process	2	O15247, A4UJ43
17	GO:0010881	regulation of cardiac muscle contraction by regulation of the release of sequestered calcium ion	biological_process	1	O15247

## Sheet: MF
Level	GO ID	Term	Type	#Seqs	Sequences
2	GO:0005198	structural molecule activity	molecular_function	4	P05787, B2RA03, B3KUB6, P08727
2	GO:0060089	molecular transducer activity	molecular_function	2	B2R8A2, P08727
2	GO:0001071	nucleic acid binding transcription factor activity	molecular_function	2	A0A087WXU6, A0A087X0Q6
2	GO:0000988	protein binding transcription factor activity	molecular_function	1	D3DSV0
2	GO:0016209	antioxidant activity	molecular_function	1	O15247
2	GO:0005215	transporter activity	molecular_function	4	Q7Z443, O15247, Q9HBR0, B8ZZZ1
2	GO:0004872	receptor activity	molecular_function	3	Q59H46, P15144, P08727
2	GO:0003824	catalytic activity	molecular_function	17	Q96DZ4, P07205, P15144, Q96B43, H0YGX7, O15247, C9J2P0, C9JSQ1, A0A024RC76, G3V2R9, B4E200, Q99536, B4DH89, A4UJ43, Q8NFR3, P37059, Q9NUU6
2	GO:0005488	binding	molecular_function	47	Q9UJC3, P26447, B4DH89, B7Z4U6, B2R8A2, B4DU58, P16422, A0A024RC76, H0Y6D8, P25815, P05787, B2RA03, P08727, D6RA82, E9PJK1, A4UJ43, A0A087X0Q6, Q59H46, B3KUB6, Q2TU64, C9JSQ1, C9J406, P55795, P07205, O15247, Q06787, C9J2P0, D3DSV0, B4DPP0, Q8IVQ8, B8ZZZ1, B4E200, Q05DN2, Q7Z443, A0A087WXU6, Q9NWM3, Q96DZ4, B4DLV6, Q8NFR3, A0A024RDE8, Q99536, A0A0D9SG53, P15144, G3V2R9, P05204, Q9H8M2, P43355
2	GO:0030234	enzyme regulator activity	molecular_function	2	D6RA82, H0YGX7
3	GO:0004871	signal transducer activity	molecular_function	2	B2R8A2, P08727
3	GO:1901363	heterocyclic compound binding	molecular_function	12	A0A024RC76, A0A087X0Q6, Q2TU64, P55795, P07205, D3DSV0, P05204, Q06787, A0A087WXU6, D6RA82, Q9H8M2, H0Y6D8
3	GO:0005515	protein binding	molecular_function	42	Q9UJC3, P26447, B7Z4U6, B2R8A2, B4DU58, P16422, H0Y6D8, P05787, B2RA03, P08727, P25815, D6RA82, E9PJK1, Q59H46, B3KUB6, C9J406, P55795, P07205, O15247, Q06787, C9J2P0, D3DSV0, B4DPP0, Q8IVQ8, B8ZZZ1, B4E200, Q05DN2, Q7Z443, A0A087WXU6, Q9NWM3, Q96DZ4, B4DLV6, Q8NFR3, Q2TU64, A0A0D9SG53, P05204, Q9H8M2, A0A087X0Q6, A0A024RDE8, P43355, A4UJ43, B4DH89
3	GO:0008144	drug binding	molecular_function	1	B4E200
3	GO:0033218	amide binding	molecular_function	2	A4UJ43, B4E200
3	GO:0097367	carbohydrate derivative binding	molecular_function	1	Q2TU64
3	GO:0003823	antigen binding	molecular_function	1	E9PJK1
3	GO:1901681	sulfur compound binding	molecular_function	1	A4UJ43
3	GO:0016874	ligase activity	molecular_function	1	C9J2P0
3	GO:0016740	transferase activity	molecular_function	6	P07205, C9JSQ1, O15247, A4UJ43, Q8NFR3, Q99536
3	GO:0022857	transmembrane transporter activity	molecular_function	3	Q7Z443, O15247, Q9HBR0
3	GO:0016491	oxidoreductase activity	molecular_function	5	O15247, G3V2R9, Q99536, B4DH89, P37059
3	GO:0016787	hydrolase activity	molecular_function	6	Q96DZ4, P15144, Q96B43, H0YGX7, A0A024RC76, Q9NUU6
3	GO:0016853	isomerase activity	molecular_function	1	B4E200
3	GO:0043167	ion binding	molecular_function	14	P25815, A4UJ43, D6RA82, A0A087X0Q6, Q2TU64, A0A024RDE8, Q99536, A0A0D9SG53, P15144, G3V2R9, Q96DZ4, B7Z4U6, P26447, B4DU58
3	GO:0000989	transcription factor binding transcription factor activity	molecular_function	1	D3DSV0
3	GO:0022892	substrate-specific transporter activity	molecular_function	4	Q7Z443, O15247, Q9HBR0, B8ZZZ1
3	GO:0008307	structural constituent of muscle	molecular_function	1	P08727
3	GO:0060589	nucleoside-triphosphatase regulator activity	molecular_function	1	H0YGX7
3	GO:0036094	small molecule binding	molecular_function	6	A4UJ43, B4DH89, Q2TU64, P55795, P07205, D3DSV0
3	GO:0008289	lipid binding	molecular_function	1	D6RA82
3	GO:0003700	sequence-specific DNA binding transcription factor activity	molecular_function	2	A0A087WXU6, A0A087X0Q6
3	GO:0097159	organic cyclic compound binding	molecular_function	13	B4DH89, A0A024RC76, A0A087X0Q6, Q2TU64, P55795, P07205, D3DSV0, P05204, Q06787, A0A087WXU6, D6RA82, Q9H8M2, H0Y6D8
3	GO:0003682	chromatin binding	molecular_function	1	P05204
3	GO:0004857	enzyme inhibitor activity	molecular_function	1	D6RA82
3	GO:0005200	structural constituent of cytoskeleton	molecular_function	1	P08727
4	GO:0016765	transferase activity, transferring alkyl or aryl (other than methyl) groups	molecular_function	2	O15247, A4UJ43
4	GO:0016772	transferase activity, transferring phosphorus-containing groups	molecular_function	2	P07205, C9JSQ1
4	GO:0042393	histone binding	molecular_function	1	Q9H8M2
4	GO:0005102	receptor binding	molecular_function	4	P08727, Q59H46, P26447, P25815
4	GO:0030695	GTPase regulator activity	molecular_function	1	H0YGX7
4	GO:0016684	oxidoreductase activity, acting on peroxide as acceptor	molecular_function	1	O15247
4	GO:0038023	signaling receptor activity	molecular_function	1	P08727
4	GO:0008565	protein transporter activity	molecular_function	1	B8ZZZ1
4	GO:0003712	transcription cofactor activity	molecular_function	1	D3DSV0
4	GO:0022803	passive transmembrane transporter activity	molecular_function	2	Q7Z443, O15247
4	GO:0016903	oxidoreductase activity, acting on the aldehyde or oxo group of donors	molecular_function	1	B4DH89
4	GO:0048306	calcium-dependent protein binding	molecular_function	2	P25815, D6RA82
4	GO:0000149	SNARE binding	molecular_function	1	B2R8A2
4	GO:0016229	steroid dehydrogenase activity	molecular_function	1	P37059
4	GO:0000981	sequence-specific DNA binding RNA polymerase II transcription factor activity	molecular_function	1	A0A087WXU6
4	GO:0016627	oxidoreductase activity, acting on the CH-CH group of donors	molecular_function	1	G3V2R9
4	GO:0046983	protein dimerization activity	molecular_function	2	B4DH89, A4UJ43
4	GO:0055102	lipase inhibitor activity	molecular_function	1	D6RA82
4	GO:0016817	hydrolase activity, acting on acid anhydrides	molecular_function	1	H0YGX7
4	GO:0008092	cytoskeletal protein binding	molecular_function	4	B7Z4U6, B3KUB6, B4DU58, A0A024RDE8
4	GO:0003676	nucleic acid binding	molecular_function	10	A0A024RC76, A0A087X0Q6, P55795, P05204, Q06787, A0A087WXU6, D6RA82, D3DSV0, Q9H8M2, H0Y6D8
4	GO:0019904	protein domain specific binding	molecular_function	2	B4DU58, B7Z4U6
4	GO:1901265	nucleoside phosphate binding	molecular_function	4	Q2TU64, P55795, P07205, D3DSV0
4	GO:0016614	oxidoreductase activity, acting on CH-OH group of donors	molecular_function	1	P37059
4	GO:0042802	identical protein binding	molecular_function	4	Q9UJC3, P26447, B4DH89, A4UJ43
4	GO:0043169	cation binding	molecular_function	11	P25815, A0A087X0Q6, A0A024RDE8, Q99536, A0A0D9SG53, P15144, G3V2R9, Q96DZ4, B7Z4U6, P26447, D6RA82
4	GO:0016879	ligase activity, forming carbon-nitrogen bonds	molecular_function	1	C9J2P0
4	GO:0043168	anion binding	molecular_function	3	A4UJ43, D6RA82, Q2TU64
4	GO:0051082	unfolded protein binding	molecular_function	1	Q2TU64
4	GO:0042277	peptide binding	molecular_function	2	A4UJ43, B4E200
4	GO:0016859	cis-trans isomerase activity	molecular_function	1	B4E200
4	GO:0001882	nucleoside binding	molecular_function	1	Q2TU64
4	GO:0022891	substrate-specific transmembrane transporter activity	molecular_function	3	Q7Z443, O15247, Q9HBR0
4	GO:0032403	protein complex binding	molecular_function	4	B4DU58, P16422, E9PJK1, P05204
4	GO:0008233	peptidase activity	molecular_function	3	Q96DZ4, P15144, Q96B43
4	GO:0016788	hydrolase activity, acting on ester bonds	molecular_function	1	A0A024RC76
4	GO:0043177	organic acid binding	molecular_function	1	A4UJ43
4	GO:0044325	ion channel binding	molecular_function	1	A0A0D9SG53
4	GO:0019899	enzyme binding	molecular_function	4	P43355, A4UJ43, A0A087X0Q6, H0Y6D8
4	GO:0008134	transcription factor binding	molecular_function	3	H0Y6D8, Q9H8M2, A0A087X0Q6
4	GO:0016746	transferase activity, transferring acyl groups	molecular_function	2	Q8NFR3, Q99536
4	GO:0097110	scaffold protein binding	molecular_function	2	P05787, B2RA03
5	GO:0070011	peptidase activity, acting on L-amino acid peptides	molecular_function	3	Q96DZ4, P15144, Q96B43
5	GO:0023023	MHC protein complex binding	molecular_function	1	E9PJK1
5	GO:0042287	MHC protein binding	molecular_function	1	P08727
5	GO:0016301	kinase activity	molecular_function	2	P07205, C9JSQ1
5	GO:0042826	histone deacetylase binding	molecular_function	1	P43355
5	GO:0050786	RAGE receptor binding	molecular_function	2	P26447, P25815
5	GO:0016775	phosphotransferase activity, nitrogenous group as acceptor	molecular_function	1	C9JSQ1
5	GO:0031491	nucleosome binding	molecular_function	1	P05204
5	GO:0016620	oxidoreductase activity, acting on the aldehyde or oxo group of donors, NAD or NADP as acceptor	molecular_function	1	B4DH89
5	GO:0000166	nucleotide binding	molecular_function	4	Q2TU64, P55795, P07205, D3DSV0
5	GO:0016818	hydrolase activity, acting on acid anhydrides, in phosphorus-containing anhydrides	molecular_function	1	H0YGX7
5	GO:0005083	small GTPase regulator activity	molecular_function	1	H0YGX7
5	GO:0032549	ribonucleoside binding	molecular_function	1	Q2TU64
5	GO:0016747	transferase activity, transferring acyl groups other than amino-acyl groups	molecular_function	2	Q8NFR3, Q99536
5	GO:0035639	purine ribonucleoside triphosphate binding	molecular_function	1	Q2TU64
5	GO:0005543	phospholipid binding	molecular_function	1	D6RA82
5	GO:0031406	carboxylic acid binding	molecular_function	1	A4UJ43
5	GO:0017022	myosin binding	molecular_function	1	B7Z4U6
5	GO:0016616	oxidoreductase activity, acting on the CH-OH group of donors, NAD or NADP as acceptor	molecular_function	1	P37059
5	GO:0016774	phosphotransferase activity, carboxyl group as acceptor	molecular_function	1	P07205
5	GO:0003779	actin binding	molecular_function	3	B3KUB6, B4DU58, B7Z4U6
5	GO:0046872	metal ion binding	molecular_function	11	P25815, A0A087X0Q6, A0A024RDE8, Q99536, A0A0D9SG53, P15144, G3V2R9, Q96DZ4, B7Z4U6, P26447, D6RA82
5	GO:0004601	peroxidase activity	molecular_function	1	O15247
5	GO:0001883	purine nucleoside binding	molecular_function	1	Q2TU64
5	GO:0070491	repressing transcription factor binding	molecular_function	1	H0Y6D8
5	GO:0003713	transcription coactivator activity	molecular_function	1	D3DSV0
5	GO:0016881	acid-amino acid ligase activity	molecular_function	1	C9J2P0
5	GO:0003677	DNA binding	molecular_function	5	A0A087X0Q6, P05204, A0A087WXU6, Q9H8M2, H0Y6D8
5	GO:0015075	ion transmembrane transporter activity	molecular_function	3	Q7Z443, O15247, Q9HBR0
5	GO:0005342	organic acid transmembrane transporter activity	molecular_function	1	Q9HBR0
5	GO:0015267	channel activity	molecular_function	2	Q7Z443, O15247
5	GO:0003723	RNA binding	molecular_function	4	A0A024RC76, P55795, Q06787, D3DSV0
5	GO:0001664	G-protein coupled receptor binding	molecular_function	1	Q59H46
5	GO:0004364	glutathione transferase activity	molecular_function	2	O15247, A4UJ43
5	GO:0003755	peptidyl-prolyl cis-trans isomerase activity	molecular_function	1	B4E200
5	GO:0004518	nuclease activity	molecular_function	1	A0A024RC76
5	GO:0016018	cyclosporin A binding	molecular_function	1	B4E200
5	GO:0042803	protein homodimerization activity	molecular_function	2	B4DH89, A4UJ43
5	GO:0001067	regulatory region nucleic acid binding	molecular_function	3	A0A087X0Q6, Q9H8M2, H0Y6D8
5	GO:0016628	oxidoreductase activity, acting on the CH-CH group of donors, NAD or NADP as acceptor	molecular_function	1	G3V2R9
5	GO:0004888	transmembrane signaling receptor activity	molecular_function	1	P08727
5	GO:0004859	phospholipase inhibitor activity	molecular_function	1	D6RA82
5	GO:1900750	oligopeptide binding	molecular_function	1	A4UJ43
5	GO:0070577	histone acetyl-lysine binding	molecular_function	1	Q9H8M2
5	GO:0019905	syntaxin binding	molecular_function	1	B2R8A2
6	GO:0016462	pyrophosphatase activity	molecular_function	1	H0YGX7
6	GO:0004175	endopeptidase activity	molecular_function	1	Q96DZ4
6	GO:0046914	transition metal ion binding	molecular_function	6	A0A024RDE8, Q99536, A0A0D9SG53, P15144, G3V2R9, Q96DZ4
6	GO:0004030	aldehyde dehydrogenase [NAD(P)+] activity	molecular_function	1	B4DH89
6	GO:0008238	exopeptidase activity	molecular_function	2	P15144, Q96B43
6	GO:0004540	ribonuclease activity	molecular_function	1	A0A024RC76
6	GO:0032550	purine ribonucleoside binding	molecular_function	1	Q2TU64
6	GO:0016597	amino acid binding	molecular_function	1	A4UJ43
6	GO:0017069	snRNA binding	molecular_function	2	A0A024RC76, D3DSV0
6	GO:0005509	calcium ion binding	molecular_function	4	B7Z4U6, P26447, P25815, D6RA82
6	GO:0033764	steroid dehydrogenase activity, acting on the CH-OH group of donors, NAD or NADP as acceptor	molecular_function	1	P37059
6	GO:0004527	exonuclease activity	molecular_function	1	A0A024RC76
6	GO:0022838	substrate-specific channel activity	molecular_function	2	Q7Z443, O15247
6	GO:0004312	fatty acid synthase activity	molecular_function	1	Q99536
6	GO:0005092	GDP-dissociation inhibitor activity	molecular_function	1	H0YGX7
6	GO:0003727	single-stranded RNA binding	molecular_function	2	P55795, D3DSV0
6	GO:0004602	glutathione peroxidase activity	molecular_function	1	O15247
6	GO:0016409	palmitoyltransferase activity	molecular_function	1	Q8NFR3
6	GO:0008509	anion transmembrane transporter activity	molecular_function	2	O15247, Q9HBR0
6	GO:0043565	sequence-specific DNA binding	molecular_function	1	A0A087X0Q6
6	GO:0004029	aldehyde dehydrogenase (NAD) activity	molecular_function	1	B4DH89
6	GO:0045159	myosin II binding	molecular_function	1	B7Z4U6
6	GO:0042289	MHC class II protein binding	molecular_function	1	P08727
6	GO:0000287	magnesium ion binding	molecular_function	1	P25815
6	GO:0005544	calcium-dependent phospholipid binding	molecular_function	1	D6RA82
6	GO:0019787	small conjugating protein ligase activity	molecular_function	1	C9J2P0
6	GO:0030515	snoRNA binding	molecular_function	1	A0A024RC76
6	GO:0023026	MHC class II protein complex binding	molecular_function	1	E9PJK1
6	GO:0008237	metallopeptidase activity	molecular_function	3	Q96DZ4, P15144, Q96B43
6	GO:0004111	creatine kinase activity	molecular_function	1	C9JSQ1
6	GO:0000975	regulatory region DNA binding	molecular_function	3	A0A087X0Q6, Q9H8M2, H0Y6D8
6	GO:0032553	ribonucleotide binding	molecular_function	1	Q2TU64
6	GO:0004536	deoxyribonuclease activity	molecular_function	1	A0A024RC76
6	GO:0032395	MHC class II receptor activity	molecular_function	1	P08727
6	GO:0043566	structure-specific DNA binding	molecular_function	1	P05204
6	GO:0017076	purine nucleotide binding	molecular_function	1	Q2TU64
6	GO:0047522	15-oxoprostaglandin 13-oxidase activity	molecular_function	1	G3V2R9
6	GO:0004618	phosphoglycerate kinase activity	molecular_function	1	P07205
6	GO:0016408	C-acyltransferase activity	molecular_function	1	Q8NFR3
6	GO:0003729	mRNA binding	molecular_function	2	Q06787, D3DSV0
6	GO:0008324	cation transmembrane transporter activity	molecular_function	1	Q7Z443
7	GO:0047006	17-alpha,20-alpha-dihydroxypregn-4-en-3-one dehydrogenase activity	molecular_function	1	P37059
7	GO:0004529	exodeoxyribonuclease activity	molecular_function	1	A0A024RC76
7	GO:0008270	zinc ion binding	molecular_function	6	A0A024RDE8, Q99536, A0A0D9SG53, P15144, G3V2R9, Q96DZ4
7	GO:0017111	nucleoside-triphosphatase activity	molecular_function	1	H0YGX7
7	GO:0005094	Rho GDP-dissociation inhibitor activity	molecular_function	1	H0YGX7
7	GO:0008235	metalloexopeptidase activity	molecular_function	2	P15144, Q96B43
7	GO:0015103	inorganic anion transmembrane transporter activity	molecular_function	1	O15247
7	GO:0042296	ISG15 ligase activity	molecular_function	1	C9J2P0
7	GO:0030620	U2 snRNA binding	molecular_function	1	A0A024RC76
7	GO:0004303	estradiol 17-beta-dehydrogenase activity	molecular_function	1	P37059
7	GO:0030554	adenyl nucleotide binding	molecular_function	1	Q2TU64
7	GO:0016796	exonuclease activity, active with either ribo- or deoxyribonucleic acids and producing 5'-phosphomonoesters	molecular_function	1	A0A024RC76
7	GO:0022890	inorganic cation transmembrane transporter activity	molecular_function	1	Q7Z443
7	GO:0032555	purine ribonucleotide binding	molecular_function	1	Q2TU64
7	GO:0004532	exoribonuclease activity	molecular_function	1	A0A024RC76
7	GO:0044212	transcription regulatory region DNA binding	molecular_function	3	A0A087X0Q6, Q9H8M2, H0Y6D8
7	GO:0070717	poly-purine tract binding	molecular_function	1	D3DSV0
7	GO:0004222	metalloendopeptidase activity	molecular_function	1	Q96DZ4
7	GO:0034511	U3 snoRNA binding	molecular_function	1	A0A024RC76
7	GO:0072341	modified amino acid binding	molecular_function	1	A4UJ43
7	GO:0005216	ion channel activity	molecular_function	2	Q7Z443, O15247
7	GO:0047035	testosterone dehydrogenase (NAD+) activity	molecular_function	1	P37059
7	GO:0008187	poly-pyrimidine tract binding	molecular_function	1	P55795
7	GO:0016454	C-palmitoyltransferase activity	molecular_function	1	Q8NFR3
7	GO:0008408	3'-5' exonuclease activity	molecular_function	1	A0A024RC76
7	GO:0004177	aminopeptidase activity	molecular_function	2	P15144, Q96B43
7	GO:0030619	U1 snRNA binding	molecular_function	1	A0A024RC76
7	GO:0031490	chromatin DNA binding	molecular_function	1	P05204
7	GO:0008514	organic anion transmembrane transporter activity	molecular_function	1	Q9HBR0
8	GO:0005253	anion channel activity	molecular_function	1	O15247
8	GO:0015108	chloride transmembrane transporter activity	molecular_function	1	O15247
8	GO:0031492	nucleosomal DNA binding	molecular_function	1	P05204
8	GO:0008143	poly(A) RNA binding	molecular_function	1	D3DSV0
8	GO:0046873	metal ion transmembrane transporter activity	molecular_function	1	Q7Z443
8	GO:0016895	exodeoxyribonuclease activity, producing 5'-phosphomonoesters	molecular_function	1	A0A024RC76
8	GO:0005261	cation channel activity	molecular_function	1	Q7Z443
8	GO:0004758	serine C-palmitoyltransferase activity	molecular_function	1	Q8NFR3
8	GO:0001012	RNA polymerase II regulatory region DNA binding	molecular_function	1	A0A087X0Q6
8	GO:0032559	adenyl ribonucleotide binding	molecular_function	1	Q2TU64
8	GO:0046943	carboxylic acid transmembrane transporter activity	molecular_function	1	Q9HBR0
8	GO:0043295	glutathione binding	molecular_function	1	A4UJ43
8	GO:0016896	exoribonuclease activity, producing 5'-phosphomonoesters	molecular_function	1	A0A024RC76
8	GO:0000976	transcription regulatory region sequence-specific DNA binding	molecular_function	1	A0A087X0Q6
8	GO:0003924	GTPase activity	molecular_function	1	H0YGX7
8	GO:0008266	poly(U) RNA binding	molecular_function	1	P55795
9	GO:0005254	chloride channel activity	molecular_function	1	O15247
9	GO:0000977	RNA polymerase II regulatory region sequence-specific DNA binding	molecular_function	1	A0A087X0Q6
9	GO:0008297	single-stranded DNA exodeoxyribonuclease activity	molecular_function	1	A0A024RC76
9	GO:0015171	amino acid transmembrane transporter activity	molecular_function	1	Q9HBR0
9	GO:0005524	ATP binding	molecular_function	1	Q2TU64
9	GO:0000175	3'-5'-exoribonuclease activity	molecular_function	1	A0A024RC76
9	GO:0008296	3'-5'-exodeoxyribonuclease activity	molecular_function	1	A0A024RC76
10	GO:0015179	L-amino acid transmembrane transporter activity	molecular_function	1	Q9HBR0
10	GO:0008310	single-stranded DNA 3'-5' exodeoxyribonuclease activity	molecular_function	1	A0A024RC76

## Sheet: CC
Level	GO ID	Term	Type	#Seqs	Sequences
2	GO:0005623	cell	cellular_component	50	B4DPP0, B8ZZZ1, H0Y6D8, D3DSV0, Q9H8M2, A0A087X0Q6, P16422, B7Z4U6, P55795, Q06787, B4DU58, C9J2P0, Q8IVQ8, B4DLV6, P08727, B3KUB6, E9PJK1, A0A024RDE8, P05787, B2RA03, P07205, A0A0D9SG53, A4UJ43, P26447, P05204, P25815, D6RA82, O15247, Q7Z443, Q96DZ4, Q59H46, B4E200, A0A024RC14, A0A024RC76, B2R8A2, Q9UJC3, P15144, Q2TU64, B4DVJ1, Q96B43, P43355, B4DH89, H0YGX7, Q99536, A0A087WXU6, Q9HBR0, Q05DN2,…
2	GO:0032991	macromolecular complex	cellular_component	21	H0Y6D8, D3DSV0, Q9H8M2, A0A087X0Q6, B7Z4U6, P05787, B2RA03, P08727, Q9UJC3, B8ZZZ1, B4E200, Q2TU64, Q59H46, C9J2P0, B4DU58, P55795, Q99536, Q7Z443, P43355, Q8NFR3, Q06787
2	GO:0016020	membrane	cellular_component	35	B4DPP0, B8ZZZ1, P16422, E9PJK1, P07205, P26447, D6RA82, Q9UJC3, P15144, Q2TU64, B3KUB6, B4DVJ1, B7Z4U6, A0A0D9SG53, Q96B43, Q7Z443, P43355, P08727, Q59H46, B2R8A2, P37059, Q99536, B7ZL93, P05787, P55795, O15247, A0A024RDE8, Q06787, Q96KR6, Q9HBR0, P25815, Q96DZ4, Q9H617, Q8NFR3, C9JSQ1
2	GO:0005576	extracellular region	cellular_component	27	B4DPP0, P15144, P26447, O15247, Q96DZ4, Q2TU64, P05787, P07205, B2RA03, B4DH89, P08727, E9PJK1, Q99536, B4DU58, Q59H46, B2R8A2, P16422, B7Z4U6, A4UJ43, C9JSQ1, G3V2R9, B8ZZZ1, B4E200, Q7Z443, P25815, H0YGX7, D6RA82
2	GO:0031974	membrane-enclosed lumen	cellular_component	14	H0Y6D8, P55795, Q06787, B4DU58, C9J2P0, D3DSV0, Q8IVQ8, A0A087X0Q6, B4DLV6, Q9H8M2, A0A024RC76, B4DH89, B4E200, P43355
2	GO:0030054	cell junction	cellular_component	8	E9PJK1, B4DPP0, B7Z4U6, A0A0D9SG53, P16422, Q59H46, O15247, B3KUB6
2	GO:0045202	synapse	cellular_component	1	A0A024RDE8
2	GO:0043226	organelle	cellular_component	49	B4DPP0, B8ZZZ1, H0Y6D8, B7Z4U6, P55795, Q06787, B4DU58, C9J2P0, D3DSV0, Q8IVQ8, A0A087X0Q6, B4DLV6, P08727, A0A024RDE8, P05787, B2RA03, P07205, B3KUB6, A0A0D9SG53, A4UJ43, P26447, P05204, P25815, D6RA82, E9PJK1, O15247, B4E200, Q7Z443, Q2TU64, B4DH89, Q99536, Q59H46, B2R8A2, P16422, P15144, C9JSQ1, G3V2R9, H0YGX7, Q9H8M2, A0A024RC76, Q9UJC3, Q96DZ4, A0A087WXU6, Q9HBR0, P37059, P43355, Q05DN2, B4D…
3	GO:0005911	cell-cell junction	cellular_component	1	P16422
3	GO:0044422	organelle part	cellular_component	36	B4DPP0, B8ZZZ1, H0Y6D8, B7Z4U6, P55795, Q06787, B4DU58, C9J2P0, D3DSV0, Q8IVQ8, A0A087X0Q6, B4DLV6, P08727, P05787, B2RA03, E9PJK1, O15247, B4E200, A0A024RDE8, A0A0D9SG53, P26447, Q7Z443, Q9H8M2, A0A024RC76, B2R8A2, Q9UJC3, B4DH89, Q2TU64, P37059, P43355, B4DVJ1, P15144, Q8NFR3, C9JSQ1, P05204, D6RA82
3	GO:0070161	anchoring junction	cellular_component	4	E9PJK1, B4DPP0, B7Z4U6, A0A0D9SG53
3	GO:0031982	vesicle	cellular_component	26	B4DPP0, B8ZZZ1, Q2TU64, P05787, P07205, B2RA03, B4DH89, P08727, E9PJK1, Q99536, B4DU58, Q59H46, B2R8A2, P16422, B7Z4U6, P15144, A4UJ43, P26447, C9JSQ1, G3V2R9, B4E200, Q7Z443, P25815, H0YGX7, D6RA82, O15247
3	GO:0030055	cell-substrate junction	cellular_component	5	E9PJK1, B4DPP0, B7Z4U6, A0A0D9SG53, Q59H46
3	GO:0043228	non-membrane-bounded organelle	cellular_component	20	B7Z4U6, P08727, A0A024RDE8, B4DU58, P05787, B2RA03, Q2TU64, B3KUB6, H0YGX7, P55795, Q9H8M2, A0A0D9SG53, P26447, D6RA82, O15247, Q9UJC3, P05204, Q06787, A0A024RC76, H0Y6D8
3	GO:0044464	cell part	cellular_component	50	B4DPP0, B8ZZZ1, H0Y6D8, D3DSV0, Q9H8M2, A0A087X0Q6, P16422, B7Z4U6, P55795, Q06787, B4DU58, C9J2P0, Q8IVQ8, B4DLV6, P08727, B3KUB6, E9PJK1, A0A024RDE8, P05787, B2RA03, P07205, A0A0D9SG53, A4UJ43, P26447, P05204, P25815, D6RA82, O15247, Q7Z443, Q96DZ4, Q59H46, B4E200, A0A024RC14, A0A024RC76, B2R8A2, Q9UJC3, P15144, Q2TU64, B4DVJ1, Q96B43, P43355, B4DH89, H0YGX7, Q99536, A0A087WXU6, Q9HBR0, Q05DN2,…
3	GO:0043227	membrane-bounded organelle	cellular_component	47	B4DPP0, B8ZZZ1, H0Y6D8, P55795, Q06787, B4DU58, C9J2P0, D3DSV0, Q8IVQ8, A0A087X0Q6, B4DLV6, P05787, P07205, P08727, B3KUB6, B7Z4U6, A0A0D9SG53, A4UJ43, P26447, P05204, P25815, D6RA82, O15247, B4E200, Q2TU64, B2RA03, B4DH89, E9PJK1, Q99536, Q59H46, B2R8A2, P16422, P15144, C9JSQ1, G3V2R9, Q7Z443, H0YGX7, Q9H8M2, A0A024RC76, Q9UJC3, Q96DZ4, Q9HBR0, P37059, P43355, Q05DN2, B4DVJ1, Q8NFR3
3	GO:0044425	membrane part	cellular_component	18	P16422, E9PJK1, P07205, P26447, D6RA82, Q9UJC3, B8ZZZ1, B4DPP0, P15144, P08727, Q59H46, Q7Z443, P37059, Q99536, B2R8A2, B7ZL93, Q8NFR3, B3KUB6
3	GO:0043234	protein complex	cellular_component	18	H0Y6D8, D3DSV0, Q9H8M2, A0A087X0Q6, B7Z4U6, P05787, B2RA03, P08727, Q9UJC3, B8ZZZ1, Q2TU64, Q59H46, C9J2P0, B4DU58, Q99536, Q7Z443, P43355, Q8NFR3
3	GO:0044421	extracellular region part	cellular_component	27	B4DPP0, P15144, P26447, O15247, Q96DZ4, Q2TU64, P05787, P07205, B2RA03, B4DH89, P08727, E9PJK1, Q99536, B4DU58, Q59H46, B2R8A2, P16422, B7Z4U6, A4UJ43, C9JSQ1, G3V2R9, B8ZZZ1, B4E200, Q7Z443, P25815, H0YGX7, D6RA82
3	GO:0048475	coated membrane	cellular_component	1	B8ZZZ1
4	GO:0045121	membrane raft	cellular_component	1	P07205
4	GO:0071944	cell periphery	cellular_component	19	P16422, E9PJK1, P05787, B2RA03, O15247, B3KUB6, B4DPP0, P15144, Q2TU64, B4DVJ1, B7Z4U6, A0A0D9SG53, Q96B43, P26447, Q7Z443, P43355, D6RA82, P08727, Q59H46
4	GO:0097458	neuron part	cellular_component	1	B3KUB6
4	GO:0030056	hemidesmosome	cellular_component	1	Q59H46
4	GO:0043296	apical junction complex	cellular_component	1	P16422
4	GO:0031975	envelope	cellular_component	1	C9JSQ1
4	GO:0031988	membrane-bounded vesicle	cellular_component	26	B4DPP0, B8ZZZ1, Q2TU64, P05787, P07205, B2RA03, B4DH89, P08727, E9PJK1, Q99536, B4DU58, Q59H46, B2R8A2, P16422, B7Z4U6, P15144, A4UJ43, P26447, C9JSQ1, G3V2R9, B4E200, Q7Z443, P25815, H0YGX7, D6RA82, O15247
4	GO:0043233	organelle lumen	cellular_component	14	H0Y6D8, P55795, Q06787, B4DU58, C9J2P0, D3DSV0, Q8IVQ8, A0A087X0Q6, B4DLV6, Q9H8M2, A0A024RC76, B4DH89, B4E200, P43355
4	GO:0005615	extracellular space	cellular_component	4	B4DPP0, P15144, P26447, B7Z4U6
4	GO:0009986	cell surface	cellular_component	1	Q59H46
4	GO:0031252	cell leading edge	cellular_component	1	Q59H46
4	GO:0070160	occluding junction	cellular_component	1	P16422
4	GO:0031224	intrinsic to membrane	cellular_component	8	E9PJK1, B4DPP0, P15144, Q59H46, Q7Z443, Q99536, B2R8A2, B7ZL93
4	GO:0005622	intracellular	cellular_component	49	B4DPP0, B8ZZZ1, H0Y6D8, D3DSV0, Q9H8M2, A0A087X0Q6, B7Z4U6, P55795, Q06787, B4DU58, C9J2P0, Q8IVQ8, B4DLV6, P08727, A0A024RDE8, P05787, B2RA03, P07205, B3KUB6, A0A0D9SG53, A4UJ43, P26447, P05204, P25815, D6RA82, E9PJK1, O15247, Q7Z443, Q96DZ4, B4E200, A0A024RC14, A0A024RC76, B2R8A2, Q9UJC3, B4DH89, Q2TU64, H0YGX7, Q99536, A0A087WXU6, Q9HBR0, P15144, Q96B43, Q05DN2, P37059, P43355, B4DVJ1, Q8NFR3,…
4	GO:0002178	palmitoyltransferase complex	cellular_component	1	Q8NFR3
4	GO:0031090	organelle membrane	cellular_component	10	B4DPP0, B8ZZZ1, Q9UJC3, B2R8A2, P37059, B4DVJ1, P15144, Q8NFR3, C9JSQ1, D6RA82
4	GO:0043235	receptor complex	cellular_component	1	Q59H46
4	GO:0030496	midbody	cellular_component	1	B4DU58
4	GO:0019898	extrinsic to membrane	cellular_component	1	B3KUB6
4	GO:0042995	cell projection	cellular_component	10	B3KUB6, A0A024RDE8, B4DU58, Q59H46, B7Z4U6, P26447, Q7Z443, P25815, D6RA82, O15247
4	GO:0045177	apical part of cell	cellular_component	1	P16422
4	GO:0005912	adherens junction	cellular_component	4	E9PJK1, B4DPP0, B7Z4U6, A0A0D9SG53
4	GO:0012505	endomembrane system	cellular_component	7	B4DPP0, B2R8A2, B8ZZZ1, P37059, Q8NFR3, O15247, E9PJK1
4	GO:0043230	extracellular organelle	cellular_component	25	Q2TU64, P05787, P07205, B2RA03, B4DH89, P08727, E9PJK1, Q99536, B4DU58, Q59H46, B4DPP0, B2R8A2, P16422, B7Z4U6, P15144, A4UJ43, P26447, C9JSQ1, G3V2R9, B8ZZZ1, B4E200, Q7Z443, P25815, H0YGX7, D6RA82
5	GO:0065010	extracellular membrane-bounded organelle	cellular_component	25	Q2TU64, P05787, P07205, B2RA03, B4DH89, P08727, E9PJK1, Q99536, B4DU58, Q59H46, B4DPP0, B2R8A2, P16422, B7Z4U6, P15144, A4UJ43, P26447, C9JSQ1, G3V2R9, B8ZZZ1, B4E200, Q7Z443, P25815, H0YGX7, D6RA82
5	GO:0043005	neuron projection	cellular_component	1	B3KUB6
5	GO:0072562	blood microparticle	cellular_component	1	B7Z4U6
5	GO:0012506	vesicle membrane	cellular_component	3	B4DPP0, B8ZZZ1, D6RA82
5	GO:0090543	Flemming body	cellular_component	1	B4DU58
5	GO:0042175	nuclear outer membrane-endoplasmic reticulum membrane network	cellular_component	2	P37059, Q8NFR3
5	GO:0005902	microvillus	cellular_component	1	O15247
5	GO:0016021	integral to membrane	cellular_component	8	E9PJK1, B4DPP0, P15144, Q59H46, Q7Z443, Q99536, B2R8A2, B7ZL93
5	GO:0044424	intracellular part	cellular_component	49	B4DPP0, B8ZZZ1, H0Y6D8, D3DSV0, Q9H8M2, A0A087X0Q6, B7Z4U6, P55795, Q06787, B4DU58, C9J2P0, Q8IVQ8, B4DLV6, P08727, A0A024RDE8, P05787, B2RA03, P07205, B3KUB6, A0A0D9SG53, A4UJ43, P26447, P05204, P25815, D6RA82, E9PJK1, O15247, Q7Z443, Q96DZ4, B4E200, A0A024RC14, A0A024RC76, B2R8A2, Q9UJC3, B4DH89, Q2TU64, H0YGX7, Q99536, A0A087WXU6, Q9HBR0, P15144, Q96B43, Q05DN2, P37059, P43355, B4DVJ1, Q8NFR3,…
5	GO:0044463	cell projection part	cellular_component	1	B3KUB6
5	GO:0005924	cell-substrate adherens junction	cellular_component	4	E9PJK1, B4DPP0, B7Z4U6, A0A0D9SG53
5	GO:0005923	tight junction	cellular_component	1	P16422
5	GO:0005886	plasma membrane	cellular_component	16	P16422, E9PJK1, B4DPP0, P15144, Q2TU64, B3KUB6, B4DVJ1, B7Z4U6, A0A0D9SG53, Q96B43, P26447, Q7Z443, P43355, D6RA82, P08727, Q59H46
6	GO:0005925	focal adhesion	cellular_component	4	E9PJK1, B4DPP0, B7Z4U6, A0A0D9SG53
6	GO:0034702	ion channel complex	cellular_component	1	Q7Z443
6	GO:0005737	cytoplasm	cellular_component	44	B4DPP0, B8ZZZ1, P08727, P05787, O15247, A0A024RDE8, E9PJK1, A0A0D9SG53, A0A087X0Q6, Q7Z443, P25815, Q96DZ4, B2RA03, B2R8A2, B3KUB6, Q9UJC3, D6RA82, B7Z4U6, Q99536, Q2TU64, Q9HBR0, P15144, B4DH89, C9J2P0, A4UJ43, Q96B43, Q05DN2, H0YGX7, P37059, B4E200, P26447, B4DU58, B4DVJ1, Q8NFR3, C9JSQ1, P07205, Q59H46, D3DSV0, Q8IVQ8, A0A024RC76, P43355, H0Y6D8, B4DLV6, Q06787
6	GO:0000151	ubiquitin ligase complex	cellular_component	1	C9J2P0
6	GO:0005667	transcription factor complex	cellular_component	4	H0Y6D8, D3DSV0, Q9H8M2, A0A087X0Q6
6	GO:0030880	RNA polymerase complex	cellular_component	1	H0Y6D8
6	GO:0070062	extracellular vesicular exosome	cellular_component	25	Q2TU64, P05787, P07205, B2RA03, B4DH89, P08727, E9PJK1, Q99536, B4DU58, Q59H46, B4DPP0, B2R8A2, P16422, B7Z4U6, P15144, A4UJ43, P26447, C9JSQ1, G3V2R9, B8ZZZ1, B4E200, Q7Z443, P25815, H0YGX7, D6RA82
6	GO:0043229	intracellular organelle	cellular_component	46	B4DPP0, B8ZZZ1, H0Y6D8, B7Z4U6, P55795, Q06787, B4DU58, C9J2P0, D3DSV0, Q8IVQ8, A0A087X0Q6, B4DLV6, P08727, A0A024RDE8, P05787, B2RA03, P07205, B3KUB6, A0A0D9SG53, A4UJ43, P26447, P05204, P25815, D6RA82, E9PJK1, O15247, B4E200, Q9H8M2, A0A024RC76, B2R8A2, Q9UJC3, B4DH89, Q2TU64, H0YGX7, Q99536, Q7Z443, Q96DZ4, A0A087WXU6, Q9HBR0, P15144, P37059, P43355, Q05DN2, B4DVJ1, Q8NFR3, C9JSQ1
6	GO:0044459	plasma membrane part	cellular_component	6	P16422, E9PJK1, B4DPP0, P15144, P08727, Q59H46
6	GO:0030529	ribonucleoprotein complex	cellular_component	2	P55795, Q06787
7	GO:0000428	DNA-directed RNA polymerase complex	cellular_component	1	H0Y6D8
7	GO:0043231	intracellular membrane-bounded organelle	cellular_component	43	B4DPP0, B8ZZZ1, H0Y6D8, P55795, Q06787, B4DU58, C9J2P0, D3DSV0, Q8IVQ8, A0A087X0Q6, B4DLV6, P05787, P07205, P08727, B3KUB6, B7Z4U6, A0A0D9SG53, A4UJ43, P26447, P05204, P25815, D6RA82, O15247, B4E200, Q9H8M2, A0A024RC76, B2R8A2, Q9UJC3, Q2TU64, E9PJK1, Q99536, Q7Z443, Q96DZ4, Q9HBR0, P15144, P37059, P43355, Q05DN2, B4DVJ1, H0YGX7, Q8NFR3, C9JSQ1, B4DH89
7	GO:0005844	polysome	cellular_component	1	Q06787
7	GO:0031226	intrinsic to plasma membrane	cellular_component	4	E9PJK1, B4DPP0, P15144, Q59H46
7	GO:0016323	basolateral plasma membrane	cellular_component	1	P16422
7	GO:0001772	immunological synapse	cellular_component	1	E9PJK1
7	GO:0016528	sarcoplasm	cellular_component	1	B7Z4U6
7	GO:0042611	MHC protein complex	cellular_component	1	P08727
7	GO:0016328	lateral plasma membrane	cellular_component	1	P16422
7	GO:0034703	cation channel complex	cellular_component	1	Q7Z443
7	GO:0044446	intracellular organelle part	cellular_component	32	B4DPP0, B8ZZZ1, H0Y6D8, B7Z4U6, P55795, Q06787, B4DU58, C9J2P0, D3DSV0, Q8IVQ8, A0A087X0Q6, B4DLV6, P05787, B2RA03, P08727, E9PJK1, O15247, B4E200, Q9H8M2, A0A024RC76, B2R8A2, Q9UJC3, B4DH89, Q2TU64, P37059, P43355, B4DVJ1, P15144, Q8NFR3, C9JSQ1, P05204, D6RA82
7	GO:0043232	intracellular non-membrane-bounded organelle	cellular_component	20	B7Z4U6, P08727, A0A024RDE8, B4DU58, P05787, B2RA03, Q2TU64, B3KUB6, H0YGX7, P55795, Q9H8M2, A0A0D9SG53, P26447, D6RA82, O15247, Q9UJC3, P05204, Q06787, A0A024RC76, H0Y6D8
7	GO:0044444	cytoplasmic part	cellular_component	36	B4DPP0, B8ZZZ1, P08727, P05787, O15247, A0A024RDE8, E9PJK1, A0A0D9SG53, A0A087X0Q6, Q7Z443, P25815, Q96DZ4, B2RA03, B2R8A2, B3KUB6, Q9UJC3, D6RA82, B7Z4U6, Q99536, Q2TU64, Q9HBR0, P15144, B4DH89, C9J2P0, A4UJ43, Q96B43, Q05DN2, H0YGX7, P37059, B4E200, P26447, B4DU58, B4DVJ1, Q8NFR3, C9JSQ1, Q06787
7	GO:0016324	apical plasma membrane	cellular_component	1	P16422
8	GO:0030117	membrane coat	cellular_component	1	B8ZZZ1
8	GO:0042613	MHC class II protein complex	cellular_component	1	P08727
8	GO:0005793	endoplasmic reticulum-Golgi intermediate compartment	cellular_component	2	B2R8A2, P15144
8	GO:0005840	ribosome	cellular_component	1	Q06787
8	GO:0005773	vacuole	cellular_component	3	Q9UJC3, B4DVJ1, P15144
8	GO:0070013	intracellular organelle lumen	cellular_component	14	H0Y6D8, P55795, Q06787, B4DU58, C9J2P0, D3DSV0, Q8IVQ8, A0A087X0Q6, B4DLV6, Q9H8M2, A0A024RC76, B4DH89, B4E200, P43355
8	GO:0070695	FHF complex	cellular_component	1	Q9UJC3
8	GO:0005794	Golgi apparatus	cellular_component	3	B2R8A2, B8ZZZ1, Q9HBR0
8	GO:0005829	cytosol	cellular_component	9	Q99536, Q2TU64, B4DH89, C9J2P0, B7Z4U6, A4UJ43, Q96B43, Q05DN2, H0YGX7
8	GO:0005694	chromosome	cellular_component	2	P05204, H0Y6D8
8	GO:0031410	cytoplasmic vesicle	cellular_component	5	B4DPP0, B8ZZZ1, B2R8A2, D6RA82, H0YGX7
8	GO:0005856	cytoskeleton	cellular_component	11	B7Z4U6, A0A024RDE8, B4DU58, P05787, B2RA03, P08727, Q2TU64, B3KUB6, H0YGX7, O15247, Q9UJC3
8	GO:0005768	endosome	cellular_component	1	D6RA82
8	GO:0048471	perinuclear region of cytoplasm	cellular_component	1	P26447
8	GO:0005783	endoplasmic reticulum	cellular_component	5	P37059, B2R8A2, B4E200, Q05DN2, Q8NFR3
8	GO:0031967	organelle envelope	cellular_component	1	C9JSQ1
8	GO:0005887	integral to plasma membrane	cellular_component	4	E9PJK1, B4DPP0, P15144, Q59H46
8	GO:0005634	nucleus	cellular_component	25	H0Y6D8, P55795, Q06787, B4DU58, C9J2P0, D3DSV0, Q8IVQ8, A0A087X0Q6, B4DLV6, P05787, P07205, P08727, B3KUB6, B7Z4U6, A0A0D9SG53, A4UJ43, P26447, P05204, P25815, D6RA82, O15247, B4E200, Q9H8M2, A0A024RC76, P43355
8	GO:0043292	contractile fiber	cellular_component	1	P08727
8	GO:0005938	cell cortex	cellular_component	2	B3KUB6, B7Z4U6
8	GO:0005739	mitochondrion	cellular_component	2	C9JSQ1, B4DH89
9	GO:0030119	AP-type membrane coat adaptor complex	cellular_component	1	B8ZZZ1
9	GO:0044448	cell cortex part	cellular_component	1	B7Z4U6
9	GO:0044433	cytoplasmic vesicle part	cellular_component	3	B4DPP0, B8ZZZ1, D6RA82
9	GO:0016023	cytoplasmic membrane-bounded vesicle	cellular_component	5	B4DPP0, B8ZZZ1, B2R8A2, D6RA82, H0YGX7
9	GO:0044430	cytoskeletal part	cellular_component	8	B7Z4U6, P05787, B2RA03, P08727, Q2TU64, O15247, Q9UJC3, B4DU58
9	GO:0044431	Golgi apparatus part	cellular_component	2	B2R8A2, B8ZZZ1
9	GO:0015629	actin cytoskeleton	cellular_component	3	B7Z4U6, A0A024RDE8, B4DU58
9	GO:0044427	chromosomal part	cellular_component	2	P05204, H0Y6D8
9	GO:0015630	microtubule cytoskeleton	cellular_component	5	B2RA03, Q2TU64, O15247, Q9UJC3, B4DU58
9	GO:0000323	lytic vacuole	cellular_component	2	B4DVJ1, P15144
9	GO:0044432	endoplasmic reticulum part	cellular_component	2	P37059, Q8NFR3
9	GO:0045111	intermediate filament cytoskeleton	cellular_component	3	P05787, B2RA03, P08727
9	GO:0030016	myofibril	cellular_component	1	P08727
9	GO:0008305	integrin complex	cellular_component	1	Q59H46
9	GO:0044445	cytosolic part	cellular_component	2	Q99536, Q2TU64
9	GO:0044428	nuclear part	cellular_component	14	H0Y6D8, P55795, Q06787, B4DU58, C9J2P0, D3DSV0, Q8IVQ8, A0A087X0Q6, B4DLV6, O15247, B4E200, Q9H8M2, A0A024RC76, P43355
9	GO:0044449	contractile fiber part	cellular_component	1	P08727
9	GO:0042788	polysomal ribosome	cellular_component	1	Q06787
9	GO:0019866	organelle inner membrane	cellular_component	1	C9JSQ1
9	GO:0044437	vacuolar part	cellular_component	3	Q9UJC3, B4DVJ1, P15144
9	GO:0030118	clathrin coat	cellular_component	1	B8ZZZ1
9	GO:0044429	mitochondrial part	cellular_component	1	C9JSQ1
10	GO:0031981	nuclear lumen	cellular_component	12	H0Y6D8, P55795, Q06787, B4DU58, C9J2P0, D3DSV0, Q8IVQ8, A0A087X0Q6, B4DLV6, Q9H8M2, A0A024RC76, P43355
10	GO:0005774	vacuolar membrane	cellular_component	3	Q9UJC3, B4DVJ1, P15144
10	GO:0000785	chromatin	cellular_component	2	P05204, H0Y6D8
10	GO:0030863	cortical cytoskeleton	cellular_component	1	B7Z4U6
10	GO:0030133	transport vesicle	cellular_component	2	B2R8A2, B8ZZZ1
10	GO:0030659	cytoplasmic vesicle membrane	cellular_component	3	B4DPP0, B8ZZZ1, D6RA82
10	GO:0000139	Golgi membrane	cellular_component	2	B2R8A2, B8ZZZ1
10	GO:0030131	clathrin adaptor complex	cellular_component	1	B8ZZZ1
10	GO:0005815	microtubule organizing center	cellular_component	4	B2RA03, O15247, Q9UJC3, B4DU58
10	GO:0055029	nuclear DNA-directed RNA polymerase complex	cellular_component	1	H0Y6D8
10	GO:0030141	secretory granule	cellular_component	2	D6RA82, B4DPP0
10	GO:0030135	coated vesicle	cellular_component	3	B4DPP0, B8ZZZ1, B2R8A2
10	GO:0043034	costamere	cellular_component	1	P08727
10	GO:0005764	lysosome	cellular_component	2	B4DVJ1, P15144
10	GO:0005789	endoplasmic reticulum membrane	cellular_component	2	P37059, Q8NFR3
10	GO:0005832	chaperonin-containing T-complex	cellular_component	1	Q2TU64
10	GO:0005882	intermediate filament	cellular_component	3	P05787, B2RA03, P08727
10	GO:0005874	microtubule	cellular_component	1	Q2TU64
10	GO:0005681	spliceosomal complex	cellular_component	1	P55795
10	GO:0005835	fatty acid synthase complex	cellular_component	1	Q99536
10	GO:0005819	spindle	cellular_component	1	B4DU58
10	GO:0030139	endocytic vesicle	cellular_component	3	B4DPP0, B8ZZZ1, D6RA82
10	GO:0044798	nuclear transcription factor complex	cellular_component	1	H0Y6D8
10	GO:0005740	mitochondrial envelope	cellular_component	1	C9JSQ1
10	GO:0005798	Golgi-associated vesicle	cellular_component	1	B2R8A2
10	GO:0002102	podosome	cellular_component	1	B7Z4U6
10	GO:0016459	myosin complex	cellular_component	1	B7Z4U6
11	GO:0072686	mitotic spindle	cellular_component	1	B4DU58
11	GO:0005654	nucleoplasm	cellular_component	11	H0Y6D8, P55795, Q06787, B4DU58, C9J2P0, D3DSV0, Q8IVQ8, A0A087X0Q6, B4DLV6, A0A024RC76, P43355
11	GO:0030662	coated vesicle membrane	cellular_component	2	B4DPP0, B8ZZZ1
11	GO:0044450	microtubule organizing center part	cellular_component	2	B2RA03, B4DU58
11	GO:0030666	endocytic vesicle membrane	cellular_component	3	B4DPP0, B8ZZZ1, D6RA82
11	GO:0045335	phagocytic vesicle	cellular_component	1	D6RA82
11	GO:0031211	endoplasmic reticulum palmitoyltransferase complex	cellular_component	1	Q8NFR3
11	GO:0042581	specific granule	cellular_component	1	D6RA82
11	GO:0016460	myosin II complex	cellular_component	1	B7Z4U6
11	GO:0005765	lysosomal membrane	cellular_component	2	B4DVJ1, P15144
11	GO:0000791	euchromatin	cellular_component	1	H0Y6D8
11	GO:0031966	mitochondrial membrane	cellular_component	1	C9JSQ1
11	GO:0005730	nucleolus	cellular_component	3	Q06787, B4DU58, A0A024RC76
11	GO:0071013	catalytic step 2 spliceosome	cellular_component	1	P55795
11	GO:0031091	platelet alpha granule	cellular_component	1	B4DPP0
11	GO:0045095	keratin filament	cellular_component	3	P05787, B2RA03, P08727
11	GO:0030667	secretory granule membrane	cellular_component	1	B4DPP0
11	GO:0005813	centrosome	cellular_component	2	B2RA03, B4DU58
11	GO:0000228	nuclear chromosome	cellular_component	1	H0Y6D8
11	GO:0030897	HOPS complex	cellular_component	1	Q9UJC3
11	GO:0030864	cortical actin cytoskeleton	cellular_component	1	B7Z4U6
11	GO:0030136	clathrin-coated vesicle	cellular_component	3	B4DPP0, B8ZZZ1, B2R8A2
12	GO:0044454	nuclear chromosome part	cellular_component	1	H0Y6D8
12	GO:0017059	serine C-palmitoyltransferase complex	cellular_component	1	Q8NFR3
12	GO:0030670	phagocytic vesicle membrane	cellular_component	1	D6RA82
12	GO:0030140	trans-Golgi network transport vesicle	cellular_component	1	B2R8A2
12	GO:0005814	centriole	cellular_component	1	B4DU58
12	GO:0030478	actin cap	cellular_component	1	B7Z4U6
12	GO:0030120	vesicle coat	cellular_component	1	B8ZZZ1
12	GO:0005743	mitochondrial inner membrane	cellular_component	1	C9JSQ1
12	GO:0030665	clathrin-coated vesicle membrane	cellular_component	2	B4DPP0, B8ZZZ1
12	GO:0034451	centriolar satellite	cellular_component	1	B2RA03
12	GO:0044451	nucleoplasm part	cellular_component	3	H0Y6D8, A0A024RC76, P43355
12	GO:0031092	platelet alpha granule membrane	cellular_component	1	B4DPP0
12	GO:0045334	clathrin-coated endocytic vesicle	cellular_component	2	B4DPP0, B8ZZZ1
13	GO:0030669	clathrin-coated endocytic vesicle membrane	cellular_component	2	B4DPP0, B8ZZZ1
13	GO:0016604	nuclear body	cellular_component	1	A0A024RC76
13	GO:0030125	clathrin vesicle coat	cellular_component	1	B8ZZZ1
13	GO:0000118	histone deacetylase complex	cellular_component	1	P43355
13	GO:0000790	nuclear chromatin	cellular_component	1	H0Y6D8
13	GO:0016591	DNA-directed RNA polymerase II, holoenzyme	cellular_component	1	H0Y6D8
14	GO:0015030	Cajal body	cellular_component	1	A0A024RC76
14	GO:0016605	PML body	cellular_component	1	A0A024RC76
14	GO:0005719	nuclear euchromatin	cellular_component	1	H0Y6D8
14	GO:0005672	transcription factor TFIIA complex	cellular_component	1	H0Y6D8
14	GO:0005669	transcription factor TFIID complex	cellular_component	1	H0Y6D8

## Sheet: Enrichment
GO.ID	Term	Category	Test	Ref	TestAll	RefAll	X.Test	X.Ref	Over.Under	TestSeqs	RefSeqs	p.value	FDR
GO:0009888	tissue development	P	13	381	58	6054	22.4138	6.29336	over	A4UJ43, Q7Z443, P26447, B2RA03, A0A024RDE8, Q96DZ4, D6RA82, P05787, P07205, O15247, Q59H46, P08727, B3KUB6	Q32Q12, A0A024RAV5, Q53T40, Q13627, O75970, B3KPX1, Q03828, P43034, Q92796, P13645, A8K9U1, Q9UEH5, Q92769, B7Z722, A0A0A0N0M2, B4DMY4, A0A087X020, Q15797, Q49AE1, F8WC54, Q13586, P26038, Q9UQS6, E7EMF1, Q53RS1, P57105, H7C0E2, Q53EU2, A5YM53, Q8WUI4, R4GMT0, Q86UJ2, Q53EL3, O94907, B4DYT5, Q4KR72, C9JU34, Q06310, Q9BR76, A0A024R3E4, Q9UPY3, H0Y9V7, P61586, P08581, B4DM44, Q86TY5, Q15648, P16152,…	3.69224e-05	0.29741
GO:0045095	keratin filament	C	3	10	58	6054	5.17241	0.16518	over	B2RA03, P05787, P08727	P48729, Q6ZRV2, H6VRF8, P35908, A0A024R8X3, B3KRV2, O95678,B2RA03, P05787, P08727	9.39696e-05	0.378463
GO:0050786	RAGE receptor binding	F	2	5	58	6054	3.44828	0.08259	over	P26447, P25815	Q99584, Q5U071, P09429,P26447, P25815	0.000877356	0.838809
GO:0044421	extracellular region part	C	27	1679	58	6054	46.5517	27.7337	over	H0YGX7, A4UJ43, Q7Z443, B4E200, P16422, P26447, Q99536, E9PJK1, B2RA03, P25815, B8ZZZ1, P15144, B4DH89, Q96DZ4, Q2TU64, B7Z4U6, D6RA82, P05787, P07205, C9JSQ1, O15247, B2R8A2, G3V2R9, Q59H46, B4DPP0, P08727, B4DU58	A0A024RB99, Q15847, P08758, P08754, P14174, P06576, Q32Q12, P55084, Q53SV6, A0A024RAV5, A0A024RAV4, P55081, Q15836, P98172, B2R9X3, P55072, F8VV56, P55060, Q8WVQ1, B2R9V7, Q13630, O75976, P04350, Q96GX3, P08708, Q13619, B2R9T9, O75962, A0A024R4X0, F5H4V9, Q01650, Q13601, B2R9S6, F2Z2V0, K4DI93, V9HW89, O75947, Q53FV3, Q9UES0, Q53G71, Q9H2U2, Q9H2U1, P55011, P25685, Q8WVJ2, P43034, P15880, K7EIX4,…	0.000974573	0.838809
GO:0032502	developmental process	P	29	1875	58	6054	50	30.9713	over	H0YGX7, A4UJ43, Q9UJC3, Q7Z443, P16422, P26447, A0A087WXU6, Q99536, E9PJK1, B2RA03, P25815, A0A024RDE8, P15144, B4DH89, A0A087X0Q6, Q96DZ4, B7Z4U6, Q06787, Q9H8M2, D6RA82, A0A0D9SG53, P05787, P07205, O15247, Q59H46, B4DPP0, P08727, B3KUB6, B4DU58	B7Z7F5, P98198, A0A087X0K9, Q15847, P08758, P08754, P14174, P06576, B1AKN7, Q32Q12, P49662, A0A024RAV5, A0A024RAV4, Q15836, P98172, P39880, J3QR41, Q5TG80, Q13641, F8VV56, F8VV52, Q15814, Q15813, B2R9V7, B4DNM0, Q86VU2, Q9H2Y7, A0A024RB49, Q53T40, Q13627, O75976, O75970, P04350, Q96GX3, Q01664, Q13619, Q13617, Q86VS8, Q86W42, O75962, P55036, F5H4V9, B3KPX1, Q5VUJ6, Q7KZ85, Q01650, Q13608, A0A024R…	0.00107132	0.838809
GO:0005576	extracellular region	C	27	1707	58	6054	46.5517	28.1962	over	H0YGX7, A4UJ43, Q7Z443, B4E200, P16422, P26447, Q99536, E9PJK1, B2RA03, P25815, B8ZZZ1, P15144, B4DH89, Q96DZ4, Q2TU64, B7Z4U6, D6RA82, P05787, P07205, C9JSQ1, O15247, B2R8A2, G3V2R9, Q59H46, B4DPP0, P08727, B4DU58	A0A024RB99, Q15847, P08758, P08754, P14174, P06576, Q32Q12, P55084, Q53SV6, A0A024RAV5, A0A024RAV4, P55081, Q15836, P98173, P98172, B2R9X3, P55072, F8VV56, P55060, Q8WVQ1, B2R9V7, Q13630, O75976, P04350, Q96GX3, P08708, Q13619, B2R9T9, O75962, A0A024R4X0, F5H4V9, Q01650, Q13601, B2R9S6, F2Z2V0, K4DI93, V9HW89, O75947, Q53FV3, Q9UES0, Q53G71, Q9H2U2, Q9H2U1, P55011, P25685, Q8WVJ2, P43034, P15880,…	0.00125175	0.838809
GO:0065010	extracellular membrane-bounded organelle	C	25	1548	58	6054	43.1034	25.5699	over	H0YGX7, A4UJ43, Q7Z443, B4E200, P16422, P26447, Q99536, E9PJK1, B2RA03, P25815, B8ZZZ1, P15144, B4DH89, Q2TU64, B7Z4U6, D6RA82, P05787, P07205, C9JSQ1, B2R8A2, G3V2R9, Q59H46, B4DPP0, P08727, B4DU58	A0A024RB99, Q15847, P08758, P08754, P14174, P06576, Q32Q12, P55084, Q53SV6, A0A024RAV5, A0A024RAV4, Q15836, P98172, B2R9X3, P55072, F8VV56, P55060, Q8WVQ1, B2R9V7, Q13630, O75976, P04350, Q96GX3, P08708, Q13619, B2R9T9, A0A024R4X0, F5H4V9, Q01650, B2R9S6, F2Z2V0, K4DI93, V9HW89, O75947, Q53FV3, Q9UES0, Q53G71, Q9H2U2, Q9H2U1, P55011, P25685, Q8WVJ2, P43034, P15880, K7EIX4, F5H4Q5, D6RIY6, L0R849,…	0.00153496	0.838809
GO:0006793	phosphorus metabolic process	P	3	1205	58	6054	5.17241	19.9042	under	A4UJ43, E9PJK1, D3DSV0	E9PNK6, P51970, P08754, P14174, P06576, Q32Q12, P55084, A0A024RAV5, B2R9X3, J3QR41, P55072, Q9NRF8, Q13630, Q86VU2, A0A024RB49, B3KPZ7, Q13627, E9PNF5, Q96GX5, Q01664, A0A024R595, O75962, P55036, A0A024RAQ3, E9PAK5, B2R9S6, F2Z2V0, A0A024RB10, F2Z2U4, O75947, Q9H2U2, B3KPV5, P25685, F5H4R1, P43034, P78527, Q6UXP6, Q96H20, P21283, P21281, Q3ZCQ8, V9HW35, A0A024RAJ5, P62195, P62191, B2R9L6, P11498,…	0.00117242	0.838809
GO:0070062	extracellular vesicular exosome	C	25	1548	58	6054	43.1034	25.5699	over	H0YGX7, A4UJ43, Q7Z443, B4E200, P16422, P26447, Q99536, E9PJK1, B2RA03, P25815, B8ZZZ1, P15144, B4DH89, Q2TU64, B7Z4U6, D6RA82, P05787, P07205, C9JSQ1, B2R8A2, G3V2R9, Q59H46, B4DPP0, P08727, B4DU58	A0A024RB99, Q15847, P08758, P08754, P14174, P06576, Q32Q12, P55084, Q53SV6, A0A024RAV5, A0A024RAV4, Q15836, P98172, B2R9X3, P55072, F8VV56, P55060, Q8WVQ1, B2R9V7, Q13630, O75976, P04350, Q96GX3, P08708, Q13619, B2R9T9, A0A024R4X0, F5H4V9, Q01650, B2R9S6, F2Z2V0, K4DI93, V9HW89, O75947, Q53FV3, Q9UES0, Q53G71, Q9H2U2, Q9H2U1, P55011, P25685, Q8WVJ2, P43034, P15880, K7EIX4, F5H4Q5, D6RIY6, L0R849,…	0.00153496	0.838809
GO:0043230	extracellular organelle	C	25	1548	58	6054	43.1034	25.5699	over	H0YGX7, A4UJ43, Q7Z443, B4E200, P16422, P26447, Q99536, E9PJK1, B2RA03, P25815, B8ZZZ1, P15144, B4DH89, Q2TU64, B7Z4U6, D6RA82, P05787, P07205, C9JSQ1, B2R8A2, G3V2R9, Q59H46, B4DPP0, P08727, B4DU58	A0A024RB99, Q15847, P08758, P08754, P14174, P06576, Q32Q12, P55084, Q53SV6, A0A024RAV5, A0A024RAV4, Q15836, P98172, B2R9X3, P55072, F8VV56, P55060, Q8WVQ1, B2R9V7, Q13630, O75976, P04350, Q96GX3, P08708, Q13619, B2R9T9, A0A024R4X0, F5H4V9, Q01650, B2R9S6, F2Z2V0, K4DI93, V9HW89, O75947, Q53FV3, Q9UES0, Q53G71, Q9H2U2, Q9H2U1, P55011, P25685, Q8WVJ2, P43034, P15880, K7EIX4, F5H4Q5, D6RIY6, L0R849,…	0.00153496	0.838809
GO:0005882	intermediate filament	C	3	26	58	6054	5.17241	0.429468	over	B2RA03, P05787, P08727	Q9H307, P13645, P08670, P20700, Q86UE8, A0A087WYY6, B7Z499, P48729, Q6ZRV2, B8QGS9, Q03252, D3DVC4, H6VRF8, P35908, A0A024R8X3, P02545, A0A024R8L8, B3KRV2, O95678, A0A024RBR1, P35527, Q53TE4, B3KQI5,B2RA03, P05787, P08727	0.00175864	0.838809
GO:0009653	anatomical structure morphogenesis	P	15	746	58	6054	25.8621	12.3224	over	H0YGX7, Q7Z443, P26447, Q99536, B2RA03, A0A024RDE8, B4DH89, Q96DZ4, B7Z4U6, D6RA82, A0A0D9SG53, O15247, Q59H46, P08727, B3KUB6	A0A087X0K9, P06576, A0A024RAV5, P98172, P39880, Q15814, Q86VU2, Q53T40, O75970, P04350, O75962, P55036, F2Z2V0, Q03828, Q8WVM8, A0A024RB10, Q53G71, P43034, O75911, F2Z329, P21281, B3KQ29, P62195, P62191, B2R9L6, B3KPP8, B4DNA3, Q9NQX4, Q92796, Q3ZCM7, A8K9U1, Q9H2J4, Q92769, B7Z722, P46939, B1AJY7, Q92747, A0A0A0N0M2, B1AK87, F2Z2E2, H7C155, X6RKS3, B7Z6L4, P34931, Q9H2D6, R4GNH3, H7C0R2, Q15797,…	0.00229894	0.838809
GO:0044707	single-multicellular organism process	P	29	1972	58	6054	50	32.5735	over	H0YGX7, B4DVJ1, A4UJ43, Q9UJC3, Q7Z443, P26447, A0A087WXU6, E9PJK1, B2RA03, P25815, A0A024RDE8, P15144, P37059, B4DH89, A0A087X0Q6, Q96DZ4, B7Z4U6, Q06787, Q9H8M2, D6RA82, A0A0D9SG53, P05787, C9JSQ1, O15247, Q59H46, B4DPP0, P08727, B3KUB6, B4DU58	B7Z7F5, P98198, A0A087X0K9, P08758, P08754, P14174, P06576, J3QR58, B1AKN7, Q32Q12, P49662, A0A024RAV5, A0A024RAV4, Q15836, P98172, P39880, J3QR41, Q5TG80, Q13641, F8VV56, F8VV52, Q15813, B2R9V7, B4DNM0, Q86VU2, Q9H2Y7, A0A024RB49, Q53T40, Q13627, O75976, O75970, P04350, Q96GX3, Q01664, Q13619, Q13617, Q86VS8, Q86W42, O75962, A0A024R4X0, P55036, F5H4V9, B3KPX1, Q5VUJ6, Q01650, Q13606, A0A024R588,…	0.00236083	0.838809
GO:0071801	regulation of podosome assembly	P	2	8	58	6054	3.44828	0.132144	over	B7Z4U6, B4DU58	P12931, B2RA70, Q14651, Q16658, B4DPW9, B4DQ79,B7Z4U6, B4DU58	0.00238899	0.838809
GO:0031988	membrane-bounded vesicle	C	26	1711	58	6054	44.8276	28.2623	over	H0YGX7, A4UJ43, Q7Z443, B4E200, P16422, P26447, Q99536, E9PJK1, B2RA03, P25815, B8ZZZ1, P15144, B4DH89, Q2TU64, B7Z4U6, D6RA82, P05787, P07205, C9JSQ1, O15247, B2R8A2, G3V2R9, Q59H46, B4DPP0, P08727, B4DU58	A0A024RB99, E7ENI6, Q15847, P08758, P08754, P14174, P06576, Q32Q12, P55084, Q53SV6, A0A024RAV5, A0A024RAV4, Q15836, P98173, P98172, B2R9X3, P55072, F8VV56, P55060, Q8WVQ1, B2R9V7, Q13630, O75976, P04350, Q96GX3, P08708, Q13619, B2R9T9, A0A024R4X0, F5H4V9, Q01650, B2R9S6, F2Z2V0, Q8WVM8, K4DI93, V9HW89, O75947, Q53FV3, Q9UES0, Q53G71, Q9H2U2, Q9H2U1, P55011, P25685, Q8WVJ2, D6RIZ4, P43034, P15880,…	0.00279916	0.838809
GO:0006796	phosphate-containing compound metabolic process	P	3	1180	58	6054	5.17241	19.4912	under	A4UJ43, E9PJK1, D3DSV0	E9PNK6, P51970, P08754, P14174, P06576, Q32Q12, P55084, A0A024RAV5, B2R9X3, J3QR41, P55072, Q9NRF8, Q13630, Q86VU2, A0A024RB49, B3KPZ7, Q13627, E9PNF5, Q96GX5, Q01664, A0A024R595, O75962, P55036, A0A024RAQ3, E9PAK5, B2R9S6, F2Z2V0, A0A024RB10, F2Z2U4, O75947, Q9H2U2, B3KPV5, P25685, F5H4R1, P43034, P78527, Q6UXP6, Q96H20, P21283, P21281, Q3ZCQ8, V9HW35, A0A024RAJ5, P62195, P62191, B2R9L6, Q8IV08,…	0.00146308	0.838809
GO:0006803	glutathione conjugation reaction	P	2	9	58	6054	3.44828	0.148662	over	A4UJ43, O15247	Q99735, B2R983, Q59FU9, O14880, Q9Y2Q3, F5H7F6, P09211,A4UJ43, O15247	0.00304311	0.838809
GO:0071800	podosome assembly	P	2	9	58	6054	3.44828	0.148662	over	B7Z4U6, B4DU58	P12931, B2RA70, Q14651, G3V144, Q16658, B4DPW9, B4DQ79,B7Z4U6, B4DU58	0.00304311	0.838809
GO:0004364	glutathione transferase activity	F	2	9	58	6054	3.44828	0.148662	over	A4UJ43, O15247	Q99735, B2R983, Q59FU9, O14880, Q9Y2Q3, F5H7F6, P09211,A4UJ43, O15247	0.00304311	0.838809
GO:0071944	cell periphery	C	19	1099	58	6054	32.7586	18.1533	over	B4DVJ1, Q7Z443, P16422, P26447, Q96B43, P43355, E9PJK1, B2RA03, P15144, Q2TU64, B7Z4U6, D6RA82, A0A0D9SG53, P05787, O15247, Q59H46, B4DPP0, P08727, B3KUB6	P98198, A0A087X0K9, P08758, P08754, P06576, Q86W92, Q32Q12, A0A024RAV5, Q15836, P98172, Q5TG80, Q13641, F8VV56, O75970, P04350, Q99808, Q96GX3, Q13619, Q9BSJ8, A6NGP5, A0A024R595, Q01650, Q13606, F2Z2V0, Q8NGK3, Q8WVM8, K4DI93, Q9UES0, Q53G71, P55011, P55010, A0A024RAM4, P43034, O75911, B7Z6Y2, Q96H20, P21281, Q3ZCQ8, Q9H307, B3KPP8, Q9UEL4, Q9H2M9, B3KPN7, Q9NQX3, Q92796, P62166, E9PMY3, Q3ZCM7,…	0.00308728	0.838809
GO:0097367	carbohydrate derivative binding	F	1	800	58	6054	1.72414	13.2144	under	Q2TU64	P98198, P08754, P06576, J3QR58, Q32Q12, A0A024RAV5, J3QR41, P55072, Q86VU2, Q13627, Q96GX5, P04350, Q96GX3, Q96GW9, O75962, B3KPX5, Q13608, Q86VR6, F2Z2V0, A0A024RB10, Q53G71, Q9H2U1, F5H4R1, P78527, P21281, P62195, P62191, B2R9L6, Q53FP0, P11498, B2R9K8, P54577, Q5SY16, Q9NQX4, Q3ZCM7, P13639, A0A024R4H4, A0A0A0N0M2, Q9H2G2, Q9NR30, F8WBY6, B4DMY4, P28288, H7C155, B4DZQ5, P34932, P34931, A0JP11,…	0.00230435	0.838809
GO:0042445	hormone metabolic process	P	3	34	58	6054	5.17241	0.561612	over	P15144, P37059, B4DH89	O75911, Q15738, Q53EU2, Q15648, B7Z4S4, B2R761, B2R659, B2R5T2, Q9UNE7, P49189, Q5U000, Q14849, B7Z1M0, C9J719, H0YB13, D6RCD0, E9PGI0, H0YMG7, Q8IZV5, A0A0A0MTN9, P14550, P10109, A0A0C4DGV7, E7EQL1, B3KT84, B3KT14, B4DDF8, Q02338, P30837, B1AMG5, P56937,P15144, P37059, B4DH89	0.00376125	0.838809
GO:0051016	barbed-end actin filament capping	P	2	10	58	6054	3.44828	0.16518	over	B7Z4U6, B4DU58	B1AK87, Q12929, P58546, E7EV99, P52907, P47755, A0A0U1RQQ1, F8W7U3,B7Z4U6, B4DU58	0.00376864	0.838809
GO:0031982	vesicle	C	26	1762	58	6054	44.8276	29.1047	over	H0YGX7, A4UJ43, Q7Z443, B4E200, P16422, P26447, Q99536, E9PJK1, B2RA03, P25815, B8ZZZ1, P15144, B4DH89, Q2TU64, B7Z4U6, D6RA82, P05787, P07205, C9JSQ1, O15247, B2R8A2, G3V2R9, Q59H46, B4DPP0, P08727, B4DU58	A0A024RB99, E7ENI6, Q15847, P08758, P08754, P14174, P06576, Q32Q12, P55084, Q53SV6, A0A024RAV5, A0A024RAV4, Q15836, P98173, P98172, B2R9X3, P55072, F8VV56, P55060, Q8WVQ1, B2R9V7, Q13630, O75976, O75970, P04350, Q96GX3, P08708, Q13619, B2R9T9, O75962, A0A024R4X0, F5H4V9, Q01650, B2R9S6, F2Z2V0, Q8WVM8, K4DI93, V9HW89, O75947, Q53FV3, Q9UES0, Q53G71, Q9H2U2, Q9H2U1, P55011, P25685, K7EIY4, Q8WVJ2,…	0.00413368	0.838809
GO:0032501	multicellular organismal process	P	29	2049	58	6054	50	33.8454	over	H0YGX7, B4DVJ1, A4UJ43, Q9UJC3, Q7Z443, P26447, A0A087WXU6, E9PJK1, B2RA03, P25815, A0A024RDE8, P15144, P37059, B4DH89, A0A087X0Q6, Q96DZ4, B7Z4U6, Q06787, Q9H8M2, D6RA82, A0A0D9SG53, P05787, C9JSQ1, O15247, Q59H46, B4DPP0, P08727, B3KUB6, B4DU58	B7Z7F5, P98198, A0A087X0K9, P08758, P08754, P14174, P06576, J3QR58, B1AKN7, Q32Q12, P49662, A0A024RAV5, A0A024RAV4, Q15836, P98172, P39880, J3QR41, Q5TG80, Q13641, F8VV56, F8VV52, Q15813, B2R9V7, B4DNM0, Q86VU2, Q9H2Y7, A0A024RB49, Q53T40, Q13627, O75976, O75970, P04350, Q96GX3, Q01664, Q13619, Q13617, Q86VS8, Q86W42, O75962, A0A024R4X0, P55036, F5H4V9, B3KPX1, Q5VUJ6, Q01650, Q13608, Q13606, A0A…	0.00415141	0.838809
GO:0060314	regulation of ryanodine-sensitive calcium-release channel activity	P	2	11	58	6054	3.44828	0.181698	over	A4UJ43, O15247	Q86VR1, B2R983, B2RDW0, A8K8B9, P22694, Q12797, D6R938, P62942, C9J0K6,A4UJ43, O15247	0.00456344	0.838809
GO:0060429	epithelium development	P	7	230	58	6054	12.069	3.79914	over	A4UJ43, Q7Z443, B2RA03, P05787, P07205, O15247, P08727	Q32Q12, A0A024RAV5, B3KPX1, Q03828, P43034, Q92796, P13645, B4DMY4, Q15797, Q49AE1, F8WC54, P26038, Q53RS1, P57105, H7C0E2, Q53EU2, Q86UJ2, B4DYT5, Q4KR72, C9JU34, Q9UPY3, P61586, P08581, B4DM44, Q86TY5, Q15648, P16152, B4DYI8, A8K8B2, Q6NVH9, Q9UPJ8, P35241, Q9BQD2, A0A087WZ85, A0A087WYV5, Q12965, Q9BQA1, A0A024R2J0, P11234, P11233, F5H2F4, B4DY33, Q15599, A0A024R2C4, H0Y8R3, A0A0S2A5C8, B4DL06,…	0.00458769	0.838809
GO:0048856	anatomical structure development	P	24	1596	58	6054	41.3793	26.3627	over	H0YGX7, A4UJ43, Q7Z443, P26447, A0A087WXU6, Q99536, B2RA03, P25815, A0A024RDE8, B4DH89, A0A087X0Q6, Q96DZ4, B7Z4U6, Q9H8M2, D6RA82, A0A0D9SG53, P05787, P07205, O15247, Q59H46, B4DPP0, P08727, B3KUB6, B4DU58	B7Z7F5, P98198, A0A087X0K9, P08758, P08754, P06576, B1AKN7, Q32Q12, P49662, A0A024RAV5, A0A024RAV4, Q15836, P98172, P39880, Q5TG80, Q13641, F8VV52, Q15814, B4DNM0, Q86VU2, Q9H2Y7, A0A024RB49, Q53T40, Q13627, O75976, O75970, P04350, Q96GX3, Q13619, Q13617, Q86VS8, Q86W42, O75962, P55036, F5H4V9, B3KPX1, Q5VUJ6, A0A024R588, F2Z2V0, Q03828, Q86VR2, Q8WVM8, K4DI93, A0A024RB10, F2Z2U4, Q53G71, P55011,…	0.00480935	0.838809
GO:0007275	multicellular organismal development	P	22	1431	58	6054	37.931	23.6373	over	H0YGX7, A4UJ43, Q7Z443, P26447, A0A087WXU6, P25815, A0A024RDE8, P15144, B4DH89, A0A087X0Q6, Q96DZ4, B7Z4U6, Q06787, Q9H8M2, D6RA82, A0A0D9SG53, P05787, O15247, Q59H46, B4DPP0, P08727, B3KUB6	B7Z7F5, P98198, A0A087X0K9, P08754, P06576, B1AKN7, Q32Q12, P49662, A0A024RAV5, P98172, P39880, J3QR41, Q5TG80, Q13641, B4DNM0, Q86VU2, Q9H2Y7, Q53T40, Q13627, O75976, O75970, P04350, Q01664, Q13619, Q13617, Q86VS8, Q86W42, O75962, P55036, F5H4V9, Q5VUJ6, Q01650, A0A024R588, F2Z2V0, Q03828, Q86VR2, K4DI93, A0A024RB10, F2Z2U4, Q53G71, P55011, Q8IV56, Q52LB7, A0A024RAM4, F5H4R1, P43034, O75911, P78…	0.00551956	0.838809
GO:0022617	extracellular matrix disassembly	P	3	41	58	6054	5.17241	0.677238	over	Q96DZ4, B7Z4U6, B4DU58	B4DMY4, F8WC54, Q54A51, Q8NG19, Q53RS1, R4GMX5, B4DYI8, Q5H9A7, Q92542, F8WA11, Q9UP45, P07942, P27487, B4DVP5, A9LSU1, Q59GF2, P01034, P01023, O15230, A9QQ22, Q14651, A2VCL5, Q7Z3N4, E7ES96, G3V144, E7ERI8, E3W994, A0A024R972, Q16658, P07384, Q8IYI6, P07339, P04632, B4DPW9, A5PLM9, P25774, Q45KI0, A0A087X0S5,Q96DZ4, B7Z4U6, B4DU58	0.0062832	0.838809
GO:0010880	regulation of release of sequestered calcium ion into cytosol by sarcoplasmic reticulum	P	2	13	58	6054	3.44828	0.214734	over	A4UJ43, O15247	B2R983, B2RDW0, A8K8B9, P22694, Q12797, D6R938, P62942, B3KW93, M0R116, Q9Y696, C9J0K6,A4UJ43, O15247	0.00635239	0.838809
GO:0008237	metallopeptidase activity	F	3	43	58	6054	5.17241	0.710274	over	Q96B43, P15144, Q96DZ4	O75976, Q9NQW7, Q99797, F8WC54, Q53RS1, O75844, Q9UQ90, B2RDV2, E9PLK3, A0A0A7E7X3, Q10713, J3K000, B4DKT1, B2R769, A0A024R288, Q96E52, P22695, P31930, B4DIZ6, A8K5H7, B2RAK1, P09960, Q59GF2, P53582, J3QKX5, P14735, Q9UKU6, B4DH07, D3DUJ0, P28838, P52888, O00487, A0A024R9E6, B4E2P4, A0A0A0MS96, E7EPF1, E9PCB6, Q92905, Q9H4B0, Q9H4A4,Q96B43, P15144, Q96DZ4	0.00714155	0.838809
GO:0051693	actin filament capping	P	2	14	58	6054	3.44828	0.231252	over	B7Z4U6, B4DU58	B1AK87, Q12929, G5EA42, P58546, E7EV99, Q9Y6U3, P52907, H0YMA2, Q5HYL6, P47755, A0A0U1RQQ1, F8W7U3,B7Z4U6, B4DU58	0.00734242	0.838809
GO:0014808	release of sequestered calcium ion into cytosol by sarcoplasmic reticulum	P	2	14	58	6054	3.44828	0.231252	over	A4UJ43, O15247	B2R983, B2RDW0, A8K8B9, P22694, Q12797, D6R938, P62942, B3KW93, M0R116, Q9Y696, H3BM67, C9J0K6,A4UJ43, O15247	0.00734242	0.838809
GO:0048519	negative regulation of biological process	P	24	1659	58	6054	41.3793	27.4034	over	H0YGX7, A0A024RC76, A4UJ43, P16422, A0A087WXU6, P43355, Q99536, B4DLV6, B2RA03, A0A024RDE8, H0Y6D8, B4DH89, A0A087X0Q6, Q05DN2, B7Z4U6, Q06787, Q9H8M2, D6RA82, A0A0D9SG53, O15247, Q59H46, P08727, C9J2P0, B4DU58	H7C1M2, A0A087X0K9, P08758, P08754, P14174, B1AKN7, Q32Q12, Q53SV6, A0A024RAV5, A0A024RAV4, P39880, J3QR41, F8VV52, B4DNM0, Q86VU2, Q9H2Y7, A0A024RB49, Q53T40, Q96GX9, O75970, Q01664, Q13619, Q13617, B2R9T9, A0A024R595, C9JII4, Q86W42, P55036, Q01658, B3KPX1, Q7KZ85, Q13608, A0A024R588, F2Z2V0, Q5TG38, K4DI93, A0A024RB10, F2Z2U4, Q53G71, P25685, F8W6N3, K7EIY6, Q52LB7, P43034, P78527, B7Z6Y2, L0R…	0.00754297	0.838809
GO:2000021	regulation of ion homeostasis	P	3	44	58	6054	5.17241	0.726792	over	A4UJ43, A0A0D9SG53, O15247	B2R983, Q5SWX3, Q8NEW0, B2RDW0, A8K8B9, Q9UPJ8, Q12955, A0A024R2C4, P12931, A0A024R281, Q6ZT73, P22694, Q07812, Q12797, D6R938, A0A0G2JH68, P62942, P26885, B2RA70, Q02790, Q9Y6M5, P63244, B3KW93, M0R116, Q15118, B4DGM6, Q9Y696, Q14643, Q8N335, O14617, Q9HD47, H0YLF3, P30989, B4DQ79, A0A0U1RRH1, Q8IWX8, C9JKI3, P19174, B7Z8G2, H3BM67, C9J0K6,A4UJ43, A0A0D9SG53, O15247	0.00759397	0.838809
GO:0030666	endocytic vesicle membrane	C	3	44	58	6054	5.17241	0.726792	over	B8ZZZ1, D6RA82, B4DPP0	O94973, S6AP35, F6IR49, B2R7M1, H0YEY8, A0A024R2H0, B3KNH5, E9PKJ0, P27449, Q10567, A4D0Y1, D6R938, B4DJ53, P53680, U5YKD2, B7ZKQ9, J3QLN2, P62979, Q00610, Q7Z677, Q59FG2, O43747, P15153, A8K2T7, Q9BXT2, A0A087WTM7, A0A0G2JQM1, B4DFM1, H0UID5, H0YLF3, P63000, Q9Y487, P50570, A8K0K0, P09496, P61966, O95782, C9JKI3, Q9UH51, Q92989, A0A024R5L7,B8ZZZ1, D6RA82, B4DPP0	0.00759397	0.838809
GO:0030154	cell differentiation	P	17	1033	58	6054	29.3103	17.0631	over	H0YGX7, A4UJ43, P16422, P26447, B2RA03, A0A024RDE8, A0A087X0Q6, B7Z4U6, D6RA82, A0A0D9SG53, P05787, P07205, O15247, Q59H46, B4DPP0, P08727, B3KUB6	Q15847, P06576, B1AKN7, Q32Q12, P49662, A0A024RAV5, A0A024RAV4, Q15836, P98172, P39880, F8VV56, F8VV52, B4DNM0, Q86VU2, Q9H2Y7, Q53T40, P04350, Q96GX3, Q13619, Q86VS8, O75962, P55036, F5H4V9, B3KPX1, A0A024R588, F2Z2V0, Q03828, Q86VR2, K4DI93, A0A024RB10, Q53G71, A0A024RAM4, P43034, P78527, B7Z6Y2, Q6NXE6, P62195, P62191, B2R9L6, B3KPP8, Q9NQX4, Q96GM5, Q92796, P62166, P13645, Q3ZCM7, A8K9U1, A8K…	0.00793733	0.838809
GO:0045104	intermediate filament cytoskeleton organization	P	2	15	58	6054	3.44828	0.24777	over	B2RA03, P08727	P13645, B3KPA1, P08670, A0A087WYY6, B7Z499, Q6ZRV2, B8QGS9, H6VRF8, C9J2C4, D3VVL4, O95678, P35527, B3KQI5,B2RA03, P08727	0.00839348	0.838809
GO:0045103	intermediate filament-based process	P	2	15	58	6054	3.44828	0.24777	over	B2RA03, P08727	P13645, B3KPA1, P08670, A0A087WYY6, B7Z499, Q6ZRV2, B8QGS9, H6VRF8, C9J2C4, D3VVL4, O95678, P35527, B3KQI5,B2RA03, P08727	0.00839348	0.838809
GO:0030835	negative regulation of actin filament depolymerization	P	2	15	58	6054	3.44828	0.24777	over	B7Z4U6, B4DU58	B1AK87, Q12929, G5EA42, P58546, F8VQE1, E7EV99, Q9Y6U3, P52907, H0YMA2, Q5HYL6, P47755, A0A0U1RQQ1, F8W7U3,B7Z4U6, B4DU58	0.00839348	0.838809
GO:0097110	scaffold protein binding	F	2	15	58	6054	3.44828	0.24777	over	B2RA03, P05787	P08670, H7C0E2, P12931, Q99497, Q5U0D0, Q59GT1, O14920, B2RA70, P36507, B4DFY5, O14578, Q9P021, Q8IWS0,B2RA03, P05787	0.00839348	0.838809
GO:0048869	cellular developmental process	P	18	1130	58	6054	31.0345	18.6653	over	H0YGX7, A4UJ43, P16422, P26447, E9PJK1, B2RA03, A0A024RDE8, A0A087X0Q6, B7Z4U6, D6RA82, A0A0D9SG53, P05787, P07205, O15247, Q59H46, B4DPP0, P08727, B3KUB6	Q15847, P06576, B1AKN7, Q32Q12, P49662, A0A024RAV5, A0A024RAV4, Q15836, P98172, P39880, F8VV56, F8VV52, Q15814, B4DNM0, Q86VU2, Q9H2Y7, Q53T40, P04350, Q96GX3, Q13619, Q86VS8, O75962, P55036, F5H4V9, B3KPX1, A0A024R588, F2Z2V0, Q03828, Q86VR2, Q8WVM8, K4DI93, A0A024RB10, Q53G71, A0A024RAM4, P43034, P78527, B7Z6Y2, Q6NXE6, F2Z329, P62195, P62191, B2R9L6, B3KPP8, B4DNA3, Q9NQX4, Q96GM5, Q92796, P62…	0.00858476	0.838809
GO:0070296	sarcoplasmic reticulum calcium ion transport	P	2	16	58	6054	3.44828	0.264288	over	A4UJ43, O15247	B2R983, B2RDW0, A8K8B9, P22694, Q12797, D6R938, P62942, B3KW93, M0R116, Q9Y696, P16615, A0A0U1RRH1, H3BM67, C9J0K6,A4UJ43, O15247	0.00950359	0.838809
GO:0042178	xenobiotic catabolic process	P	2	16	58	6054	3.44828	0.264288	over	A4UJ43, B4DH89	B2R983, P49419, C9J8Q5, B2R5T2, Q08257, P30038, Q59FU9, P16930, H0YMG7, C9JMC5, B4DDF8, P30837, Q02252, J3QRD1,A4UJ43, B4DH89	0.00950359	0.838809
GO:0018916	nitrobenzene metabolic process	P	1	1	58	6054	1.72414	0.016518	over	A4UJ43	A4UJ43	0.00958044	0.838809
GO:0033633	negative regulation of cell-cell adhesion mediated by integrin	P	1	1	58	6054	1.72414	0.016518	over	P16422	P16422	0.00958044	0.838809
GO:0007342	fusion of sperm to egg plasma membrane	P	1	1	58	6054	1.72414	0.016518	over	B4DPP0	B4DPP0	0.00958044	0.838809
GO:0060391	positive regulation of SMAD protein import into nucleus	P	1	1	58	6054	1.72414	0.016518	over	D3DSV0	D3DSV0	0.00958044	0.838809
GO:0045159	myosin II binding	F	1	1	58	6054	1.72414	0.016518	over	B7Z4U6	B7Z4U6	0.00958044	0.838809
GO:1902174	positive regulation of keratinocyte apoptotic process	P	1	1	58	6054	1.72414	0.016518	over	B7Z4U6	B7Z4U6	0.00958044	0.838809
GO:1902172	regulation of keratinocyte apoptotic process	P	1	1	58	6054	1.72414	0.016518	over	B7Z4U6	B7Z4U6	0.00958044	0.838809
GO:0032395	MHC class II receptor activity	F	1	1	58	6054	1.72414	0.016518	over	P08727	P08727	0.00958044	0.838809
GO:2000048	negative regulation of cell-cell adhesion mediated by cadherin	P	1	1	58	6054	1.72414	0.016518	over	P16422	P16422	0.00958044	0.838809
GO:0051410	detoxification of nitrogen compound	P	1	1	58	6054	1.72414	0.016518	over	A4UJ43	A4UJ43	0.00958044	0.838809
GO:0050915	sensory perception of sour taste	P	1	1	58	6054	1.72414	0.016518	over	Q7Z443	Q7Z443	0.00958044	0.838809
GO:0070458	cellular detoxification of nitrogen compound	P	1	1	58	6054	1.72414	0.016518	over	A4UJ43	A4UJ43	0.00958044	0.838809
GO:0047522	15-oxoprostaglandin 13-oxidase activity	F	1	1	58	6054	1.72414	0.016518	over	G3V2R9	G3V2R9	0.00958044	0.838809
GO:0043128	positive regulation of 1-phosphatidylinositol 4-kinase activity	P	1	1	58	6054	1.72414	0.016518	over	E9PJK1	E9PJK1	0.00958044	0.838809
GO:0043126	regulation of 1-phosphatidylinositol 4-kinase activity	P	1	1	58	6054	1.72414	0.016518	over	E9PJK1	E9PJK1	0.00958044	0.838809
GO:0042613	MHC class II protein complex	C	1	1	58	6054	1.72414	0.016518	over	P08727	P08727	0.00958044	0.838809
GO:0030620	U2 snRNA binding	F	1	1	58	6054	1.72414	0.016518	over	A0A024RC76	A0A024RC76	0.00958044	0.838809
GO:0031092	platelet alpha granule membrane	C	1	1	58	6054	1.72414	0.016518	over	B4DPP0	B4DPP0	0.00958044	0.838809
GO:0043000	Golgi to plasma membrane CFTR protein transport	P	1	1	58	6054	1.72414	0.016518	over	B2RA03	B2RA03	0.00958044	0.838809
GO:0030478	actin cap	C	1	1	58	6054	1.72414	0.016518	over	B7Z4U6	B7Z4U6	0.00958044	0.838809
GO:0042289	MHC class II protein binding	F	1	1	58	6054	1.72414	0.016518	over	P08727	P08727	0.00958044	0.838809
GO:0008310	single-stranded DNA 3'-5' exodeoxyribonuclease activity	F	1	1	58	6054	1.72414	0.016518	over	A0A024RC76	A0A024RC76	0.00958044	0.838809
GO:0047035	testosterone dehydrogenase (NAD+) activity	F	1	1	58	6054	1.72414	0.016518	over	P37059	P37059	0.00958044	0.838809
GO:0047006	17-alpha,20-alpha-dihydroxypregn-4-en-3-one dehydrogenase activity	F	1	1	58	6054	1.72414	0.016518	over	P37059	P37059	0.00958044	0.838809
GO:0023019	signal transduction involved in regulation of gene expression	P	1	1	58	6054	1.72414	0.016518	over	P16422	P16422	0.00958044	0.838809
GO:0097284	hepatocyte apoptotic process	P	1	1	58	6054	1.72414	0.016518	over	B7Z4U6	B7Z4U6	0.00958044	0.838809
GO:0097283	keratinocyte apoptotic process	P	1	1	58	6054	1.72414	0.016518	over	B7Z4U6	B7Z4U6	0.00958044	0.838809
GO:0014891	striated muscle atrophy	P	1	1	58	6054	1.72414	0.016518	over	B7Z4U6	B7Z4U6	0.00958044	0.838809
GO:0014889	muscle atrophy	P	1	1	58	6054	1.72414	0.016518	over	B7Z4U6	B7Z4U6	0.00958044	0.838809
GO:0035639	purine ribonucleoside triphosphate binding	F	1	706	58	6054	1.72414	11.6617	under	Q2TU64	P98198, P08754, P06576, J3QR58, Q32Q12, A0A024RAV5, J3QR41, P55072, Q86VU2, Q13627, Q96GX5, P04350, Q96GX3, Q96GW9, O75962, B3KPX5, Q13608, Q86VR6, A0A024RB10, Q9H2U1, F5H4R1, P78527, P21281, P62195, P62191, B2R9L6, P11498, B2R9K8, P54577, Q5SY16, Q9NQX4, Q3ZCM7, P13639, A0A024R4H4, A0A0A0N0M2, Q9H2G2, Q9NR30, F8WBY6, P28288, H7C155, B4DZQ5, P34931, A0JP11, R4GNH3, Q9BRS2, B3KPA1, P30520, P49588,…	0.00561792	0.838809
GO:0001883	purine nucleoside binding	F	1	712	58	6054	1.72414	11.7608	under	Q2TU64	P98198, P08754, P06576, J3QR58, Q32Q12, A0A024RAV5, J3QR41, P55072, Q86VU2, Q13627, Q96GX5, P04350, Q96GX3, Q96GW9, O75962, B3KPX5, Q13608, Q86VR6, A0A024RB10, Q9H2U1, F5H4R1, P78527, P21281, P62195, P62191, B2R9L6, P11498, B2R9K8, P54577, Q5SY16, Q9NQX4, Q3ZCM7, P13639, A0A024R4H4, A0A0A0N0M2, Q9H2G2, Q9NR30, F8WBY6, P28288, H7C155, B4DZQ5, P34931, A0JP11, R4GNH3, Q9BRS2, B3KPA1, P30520, P49588,…	0.0053127	0.838809
GO:0032550	purine ribonucleoside binding	F	1	712	58	6054	1.72414	11.7608	under	Q2TU64	P98198, P08754, P06576, J3QR58, Q32Q12, A0A024RAV5, J3QR41, P55072, Q86VU2, Q13627, Q96GX5, P04350, Q96GX3, Q96GW9, O75962, B3KPX5, Q13608, Q86VR6, A0A024RB10, Q9H2U1, F5H4R1, P78527, P21281, P62195, P62191, B2R9L6, P11498, B2R9K8, P54577, Q5SY16, Q9NQX4, Q3ZCM7, P13639, A0A024R4H4, A0A0A0N0M2, Q9H2G2, Q9NR30, F8WBY6, P28288, H7C155, B4DZQ5, P34931, A0JP11, R4GNH3, Q9BRS2, B3KPA1, P30520, P49588,…	0.0053127	0.838809
GO:0032555	purine ribonucleotide binding	F	1	713	58	6054	1.72414	11.7773	under	Q2TU64	P98198, P08754, P06576, J3QR58, Q32Q12, A0A024RAV5, J3QR41, P55072, Q86VU2, Q13627, Q96GX5, P04350, Q96GX3, Q96GW9, O75962, B3KPX5, Q13608, Q86VR6, A0A024RB10, Q9H2U1, F5H4R1, P78527, P21281, P62195, P62191, B2R9L6, P11498, B2R9K8, P54577, Q5SY16, Q9NQX4, Q3ZCM7, P13639, A0A024R4H4, A0A0A0N0M2, Q9H2G2, Q9NR30, F8WBY6, P28288, H7C155, B4DZQ5, P34931, A0JP11, R4GNH3, Q9BRS2, B3KPA1, P30520, P49588,…	0.0052634	0.838809
GO:0032549	ribonucleoside binding	F	1	715	58	6054	1.72414	11.8104	under	Q2TU64	P98198, P08754, P06576, J3QR58, Q32Q12, A0A024RAV5, J3QR41, P55072, Q86VU2, Q13627, Q96GX5, P04350, Q96GX3, Q96GW9, O75962, B3KPX5, Q13608, Q86VR6, A0A024RB10, Q9H2U1, F5H4R1, P78527, P21281, P62195, P62191, B2R9L6, P11498, B2R9K8, P54577, Q5SY16, Q9NQX4, Q3ZCM7, P13639, A0A024R4H4, A0A0A0N0M2, Q9H2G2, Q9NR30, F8WBY6, P28288, H7C155, B4DZQ5, P34931, A0JP11, R4GNH3, Q9BRS2, B3KPA1, P30520, P49588,…	0.0051661	0.838809
GO:0032553	ribonucleotide binding	F	1	717	58	6054	1.72414	11.8434	under	Q2TU64	P98198, P08754, P06576, J3QR58, Q32Q12, A0A024RAV5, J3QR41, P55072, Q86VU2, Q13627, Q96GX5, P04350, Q96GX3, Q96GW9, O75962, B3KPX5, Q13608, Q86VR6, A0A024RB10, Q9H2U1, F5H4R1, P78527, P21281, P62195, P62191, B2R9L6, Q53FP0, P11498, B2R9K8, P54577, Q5SY16, Q9NQX4, Q3ZCM7, P13639, A0A024R4H4, A0A0A0N0M2, Q9H2G2, Q9NR30, F8WBY6, P28288, H7C155, B4DZQ5, P34931, A0JP11, R4GNH3, Q9BRS2, B3KPA1, P30520,…	0.00507051	0.838809
GO:0017076	purine nucleotide binding	F	1	719	58	6054	1.72414	11.8764	under	Q2TU64	P98198, P08754, P06576, J3QR58, Q32Q12, A0A024RAV5, J3QR41, P55072, Q86VU2, Q13627, Q96GX5, P04350, Q96GX3, Q96GW9, O75962, B3KPX5, Q13608, Q86VR6, A0A024RB10, Q9H2U1, F5H4R1, P78527, P21281, P62195, P62191, B2R9L6, P11498, B2R9K8, P54577, Q5SY16, Q9NQX4, Q3ZCM7, P13639, A0A024R4H4, A0A0A0N0M2, Q9H2G2, Q9NR30, F8WBY6, P28288, H7C155, B4DZQ5, P34931, A0JP11, R4GNH3, Q9BRS2, B3KPA1, P30520, P49588,…	0.00497661	0.838809
GO:0014888	striated muscle adaptation	P	1	1	58	6054	1.72414	0.016518	over	B7Z4U6	B7Z4U6	0.00958044	0.838809
GO:0001882	nucleoside binding	F	1	722	58	6054	1.72414	11.926	under	Q2TU64	P98198, P08754, P06576, J3QR58, Q32Q12, A0A024RAV5, J3QR41, P55072, Q86VU2, Q13627, Q96GX5, P04350, Q96GX3, Q96GW9, O75962, B3KPX5, Q13608, Q86VR6, A0A024RB10, Q9H2U1, F5H4R1, P78527, P21281, P62195, P62191, B2R9L6, P11498, B2R9K8, P54577, Q5SY16, Q9NQX4, Q3ZCM7, P13639, A0A024R4H4, A0A0A0N0M2, Q9H2G2, Q9NR30, F8WBY6, P28288, H7C155, B4DZQ5, P34931, A0JP11, R4GNH3, Q9BRS2, B3KPA1, P30520, P49588,…	0.00483888	0.838809
GO:0008065	establishment of blood-nerve barrier	P	1	1	58	6054	1.72414	0.016518	over	A4UJ43	A4UJ43	0.00958044	0.838809
GO:0097017	renal protein absorption	P	1	1	58	6054	1.72414	0.016518	over	B7Z4U6	B7Z4U6	0.00958044	0.838809
GO:0050896	response to stimulus	P	35	2801	58	6054	60.3448	46.2669	over	H0YGX7, Q9NUU6, A0A024RC76, B4DVJ1, A4UJ43, Q7Z443, P16422, P26447, A0A087WXU6, Q96B43, P43355, E9PJK1, B4DLV6, B2RA03, P25815, B8ZZZ1, A0A024RDE8, P15144, P37059, B4DH89, Q05DN2, Q96DZ4, B7Z4U6, Q9H8M2, D6RA82, A0A0D9SG53, P05787, O15247, B2R8A2, Q59H46, D3DSV0, B4DPP0, P08727, C9J2P0, B4DU58	E9PNK6, A0A087X0K9, Q8WW59, Q15847, P08758, P08754, P14174, P06576, J3QR58, Q32Q12, P49662, Q53SV6, A0A024RAV5, A0A024RAV4, P98179, Q15836, P98172, J3QR41, P55072, Q5JW54, F8VV56, P55060, F8VV52, Q8WVQ1, B2R9V7, Q86VU2, Q9H2Y7, A0A024RB49, Q53T40, Q13627, Q86W56, O75970, Q96GX5, P04350, Q96GX3, F8W733, Q01664, Q13619, Q13617, Q9BSJ8, B2R9T9, A0A024R595, O75962, P55036, A0A024RAQ3, Q5VUJ6, E9PAK5,…	0.0103979	0.900589
GO:0048545	response to steroid hormone stimulus	P	3	50	58	6054	5.17241	0.8259	over	A4UJ43, D6RA82, P08727	K7EIJ0, P26038, Q53EU2, B4DYT5, Q06310, Q15648, P35241, A0A087WYV5, Q96EB6, B4DL06, P04083, B7Z3V1, D2CFK5, F1DAL8, Q6PHZ7, A8K548, M0R1V8, Q15291, Q8N4S8, A0A087WUK4, B3KW93, M0R116, P68036, P15153, A8K2T7, P24468, O15173, Q9UJU1, Q9H7S9, O14686, O75116, Q70WD9, B4E3L4, P63000, P17174, P07355, E7EQR4, P0C0S5, P31327, P05023, B4DPT1, C9JKI3, Q9Y230, Q14258, A0A087X1V3, B7Z7I2, Q53SY7,A4UJ43, D6RA…	0.0106351	0.904775
GO:0008235	metalloexopeptidase activity	F	2	17	58	6054	3.44828	0.280806	over	Q96B43, P15144	O75976, Q9NQW7, O75844, B2RDV2, A0A0A7E7X3, J3K000, B4DKT1, A0A024R288, B4DIZ6, P09960, P53582, Q9UKU6, P28838, B4E2P4, Q9H4A4,Q96B43, P15144	0.0106708	0.904775
GO:0006518	peptide metabolic process	P	3	51	58	6054	5.17241	0.842418	over	A4UJ43, P15144, O15247	D3DP46, Q9NQW7, Q99735, B2R983, P10909, Q5T8V1, A0A024R442, A0A024R3H2, E9PLK3, A0A0A7E7X3, H0YEY8, B2RCZ7, E9PL01, B2R769, A0JLT0, H7BYD9, K7ERP4, B2R5M8, P48735, A7E261, B2RAK1, P09960, Q6NSD4, P48637, B4DV28, Q59FU9, O14880, P48507, P48506, P14735, H0YNG3, Q9UKU6, O75223, B4DT01, B4DSE2, E7ES96, P00390, B4E2P4, Q9Y2Q3, F5H7F6, Q2Q9H2, B4DPY0, B1AMG5, Q9H4A4, P49755, P13798, A0A024R5L7, P09211,…	0.0111962	0.939434
GO:0048731	system development	P	19	1257	58	6054	32.7586	20.7631	over	H0YGX7, A4UJ43, Q7Z443, P26447, A0A087WXU6, P25815, A0A024RDE8, B4DH89, A0A087X0Q6, Q96DZ4, B7Z4U6, Q9H8M2, D6RA82, A0A0D9SG53, O15247, Q59H46, B4DPP0, P08727, B3KUB6	P98198, A0A087X0K9, P08754, P06576, B1AKN7, Q32Q12, P49662, A0A024RAV5, P98172, P39880, Q5TG80, Q13641, B4DNM0, Q86VU2, Q9H2Y7, Q53T40, Q13627, O75976, O75970, P04350, Q13619, Q86VS8, Q86W42, O75962, P55036, F5H4V9, A0A024R588, F2Z2V0, Q03828, Q86VR2, K4DI93, A0A024RB10, F2Z2U4, Q53G71, P55011, Q52LB7, A0A024RAM4, P43034, O75911, P78527, B7Z6Y2, Q6NXE6, P21281, B3KQ29, P62195, P62191, B2R9L6, B3K…	0.0113642	0.9437
GO:0019637	organophosphate metabolic process	P	0	514	58	6054	0	8.49025	under		P08754, P06576, Q32Q12, P55084, A0A024RAV5, B2R9X3, P55072, Q9NRF8, Q13630, E9PNF5, A0A024R595, O75962, A0A024RAQ3, E9PAK5, B2R9S6, F2Z2V0, O75947, P25685, V9HW35, Q8IV08, Q9H2M9, Q9NQX3, Q92796, B7Z722, Q9NR50, Q16222, E9PN68, K7EIN2, A2IDA3, F2Z2E2, P34931, A0JP11, P30566, E9PN17, Q659C5, B4DN40, P30520, Q99766, Q96T88, Q15751, P26038, Q8NFQ8, P51841, O95433, A8K9A5, Q96G61, P0DMV8, Q658U3, E6Z…	0.00567585	0.838809
GO:0051279	regulation of release of sequestered calcium ion into cytosol	P	2	18	58	6054	3.44828	0.297324	over	A4UJ43, O15247	B2R983, B2RDW0, A8K8B9, Q9UPJ8, Q12955, P22694, Q12797, D6R938, A0A0G2JH68, P62942, B3KW93, M0R116, Q15118, Q9Y696, P19174, C9J0K6,A4UJ43, O15247	0.0118933	0.948523
GO:1901019	regulation of calcium ion transmembrane transporter activity	P	2	18	58	6054	3.44828	0.297324	over	A4UJ43, O15247	Q86VR1, Q13586, B2R983, B4DZF1, B2RDW0, A8K8B9, A0A024R258, P22694, Q12797, D6R938, P62942, D3DVR8, Q09666, H7C5K2, P41208, C9J0K6,A4UJ43, O15247	0.0118933	0.948523
GO:0017069	snRNA binding	F	2	18	58	6054	3.44828	0.297324	over	A0A024RC76, D3DSV0	Q9NR30, P08621, Q6P2Q9, B2R802, B3KN49, B7ZLC9, C9J7B5, P55769, Q15020, Q9NW64, I3L397, Q13838, Q92989, O00148, Q8WWY3, P09234,A0A024RC76, D3DSV0	0.0118933	0.948523
GO:0010522	regulation of calcium ion transport into cytosol	P	2	18	58	6054	3.44828	0.297324	over	A4UJ43, O15247	B2R983, B2RDW0, A8K8B9, Q9UPJ8, Q12955, P22694, Q12797, D6R938, A0A0G2JH68, P62942, B3KW93, M0R116, Q15118, Q9Y696, P19174, C9J0K6,A4UJ43, O15247	0.0118933	0.948523
GO:0004177	aminopeptidase activity	F	2	19	58	6054	3.44828	0.313842	over	Q96B43, P15144	Q9NQW7, Q9NQH7, A0A024R442, B2RDV2, E9PLK3, A0A0A7E7X3, J3K000, B4DKT1, B2R769, K7ESE8, B2RAK1, P09960, P53582, Q9UKU6, P28838, B4E2P4, Q9H4A4,Q96B43, P15144	0.0131692	0.980929
GO:0006690	icosanoid metabolic process	P	2	20	58	6054	3.44828	0.33036	over	B4DVJ1, G3V2R9	P14174, Q99735, Q96SQ9, P16152, K7ERP4, C9J8E1, P49137, P09960, Q6NSD4, E5RFH6, J3QKK8, Q15185, O60427, A0A024R8L7, A0A0A0MS99, A0A0C4DG51, Q9BTZ2, B4E0M5,B4DVJ1, G3V2R9	0.0144967	0.980929
GO:1901568	fatty acid derivative metabolic process	P	2	20	58	6054	3.44828	0.33036	over	B4DVJ1, G3V2R9	P14174, Q99735, Q96SQ9, P16152, K7ERP4, C9J8E1, P49137, P09960, Q6NSD4, E5RFH6, J3QKK8, Q15185, O60427, A0A024R8L7, A0A0A0MS99, A0A0C4DG51, Q9BTZ2, B4E0M5,B4DVJ1, G3V2R9	0.0144967	0.980929
GO:0046718	viral entry into host cell	P	2	20	58	6054	3.44828	0.33036	over	E9PJK1, B7Z4U6	P42566, H7C134, A5YM53, B2R907, A0A0S2A5C8, Q12899, Q3SYF1, P27487, B4DIN7, O60493, A0A0S2Z3I6, P07237, C9JKI3, Q96J02, P09382, Q14258, K7EKE8, H3BLV0,E9PJK1, B7Z4U6	0.0144967	0.980929
GO:0040013	negative regulation of locomotion	P	3	57	58	6054	5.17241	0.941526	over	H0YGX7, B7Z4U6, P08727	H7C134, Q49AE1, Q5VTR2, P57105, Q53EU2, A5YM53, Q9BR76, B4DYI8, Q5H9A7, A0A024R2W4, A0A087WZ85, A0A087WYV5, Q12899, B1AHA8, A0A087WY66, B3KN06, Q3SYF1, A4D0Y1, Q5JRA6, P67870, F1DAL8, Q5U071, B4DJ12, A0A087WW56, Q59GF2, B4DUQ8, A8KAE3, Q15262, H0Y630, C9J712, Q8N4P8, A0A024QZN4, J3KRE2, Q5T3J6, A0A087WUK4, A8K3N4, Q9Y696, Q14678, B4DGC3, P24468, H0Y465, A0A0S2Z4Z2, E9PES6, O60493, B4E3Q9, Q9Y4C2,…	0.0148856	0.980929
GO:0043588	skin development	P	3	58	58	6054	5.17241	0.958044	over	O15247, Q59H46, P08727	Q32Q12, P13645, Q92769, Q49AE1, F8WC54, A0A024R436, B4DYT5, Q4KR72, H0Y9V7, Q15648, Q01469, P23229, B5BU61, B4DL06, P04083, P60953, P15531, P31947, P31946, B2R5M9, D9ZGF8, A8K644, B2RB95, P27348, A8K588, O75367, P29373, Q9Y696, B3KW38, H0YAF9, P29317, P15153, P63104, P35908, O75116, Q309B1, P63000, C9JMC5, A0A024R8L8, A0A0S2Z3S5, Q86YZ3, O60361, Q9NUF9, P16615, Q9P0M6, O00299, A8MX75, Q2TB79, Q14…	0.0155536	0.980929
GO:0005886	plasma membrane	C	16	1033	58	6054	27.5862	17.0631	over	B4DVJ1, Q7Z443, P16422, P26447, Q96B43, P43355, E9PJK1, P15144, Q2TU64, B7Z4U6, D6RA82, A0A0D9SG53, Q59H46, B4DPP0, P08727, B3KUB6	P98198, A0A087X0K9, P08758, P08754, P06576, Q86W92, Q32Q12, A0A024RAV5, Q15836, P98172, Q5TG80, Q13641, F8VV56, O75970, P04350, Q99808, Q96GX3, Q13619, Q9BSJ8, A6NGP5, A0A024R595, Q01650, Q13606, F2Z2V0, Q8NGK3, Q8WVM8, K4DI93, Q9UES0, Q53G71, P55011, P55010, A0A024RAM4, O75911, B7Z6Y2, Q96H20, P21281, Q3ZCQ8, Q9H307, B3KPP8, Q9UEL4, Q9H2M9, B3KPN7, Q9NQX3, Q92796, P62166, E9PMY3, Q3ZCM7, A8K9V9,…	0.015732	0.980929
GO:1901880	negative regulation of protein depolymerization	P	2	21	58	6054	3.44828	0.346878	over	B7Z4U6, B4DU58	J3QR41, B1AK87, A0A087X020, Q12929, B5BU83, F8WA11, H3BTU7, G5EA42, P58546, F8VQE1, E7EV99, Q9Y6U3, P52907, H0YMA2, Q5HYL6, A8K0K2, P47755, A0A0U1RQQ1, F8W7U3,B7Z4U6, B4DU58	0.015874	0.980929
GO:0043168	anion binding	F	3	971	58	6054	5.17241	16.039	under	A4UJ43, Q2TU64, D6RA82	A0A024RB99, P98198, P08758, P08754, P06576, J3QR58, Q32Q12, A0A024RAV5, B2R9X3, J3QR41, P55072, Q5TG80, Q86VU2, Q13627, Q96GX5, P04350, Q96GX3, Q9BSJ8, Q96GW9, O75962, A0A024R4X0, B3KPX5, A0A024RAQ3, B3KPX1, Q13608, Q86VR6, F2Z2V0, Q86VR1, A0A024RB10, Q9H2U1, F5H4R1, P78527, K7EIX0, A0A024RAL3, P21281, B7Z6W5, A0A024RAJ5, P62195, P62191, B2R9L6, P13674, Q53FP0, P11498, B2R9K8, P54577, Q5SY16, Q9N…	0.0083066	0.838809
GO:0043627	response to estrogen stimulus	P	2	21	58	6054	3.44828	0.346878	over	A4UJ43, P08727	K7EIJ0, Q53EU2, B4DYT5, B4DL06, D2CFK5, A8K548, Q15291, P15153, A8K2T7, Q9H7S9, O14686, Q70WD9, P63000, P0C0S5, B4DPT1, C9JKI3, Q9Y230, Q14258, A0A087X1V3,A4UJ43, P08727	0.015874	0.980929
GO:0043242	negative regulation of protein complex disassembly	P	2	21	58	6054	3.44828	0.346878	over	B7Z4U6, B4DU58	J3QR41, B1AK87, A0A087X020, Q12929, B5BU83, F8WA11, H3BTU7, G5EA42, P58546, F8VQE1, E7EV99, Q9Y6U3, P52907, H0YMA2, Q5HYL6, A8K0K2, P47755, A0A0U1RQQ1, F8W7U3,B7Z4U6, B4DU58	0.015874	0.980929
GO:0045111	intermediate filament cytoskeleton	C	3	60	58	6054	5.17241	0.99108	over	B2RA03, P05787, P08727	O75940, D6RIY6, Q9H307, F8W6I7, P13645, E9PMV1, B1AJY7, P08670, B2R8Y6, P20700, Q53F88, Q86UE8, A0A087WYY6, H0Y9D5, O75616, B7Z499, Q12873, A0A087WXU5, Q9UNZ2, P22626, P51531, Q9UNE7, P48729, Q6ZRV2, B8QGS9, E7EV99, P50990, Q03252, J3KS14, B4DHJ4, D3DVC4, A8K3Z5, H6VRF8, B4DH49, A0A0G2JRR0, Q15149, E9PFQ4, P35908, G3V1B4, Q8IZH2, E9PS30, A0A024R8X3, P02545, B4E3E6, A0A024R8L8, Q9Y3D9, A0A0C4DGK3,…	0.0169343	0.980929
GO:0051283	negative regulation of sequestering of calcium ion	P	2	22	58	6054	3.44828	0.363396	over	A4UJ43, O15247	B2R983, B2RDW0, A8K8B9, Q9UPJ8, Q12955, P22694, Q12797, D6R938, A0A0G2JH68, P62942, B3KW93, M0R116, Q15118, Q9Y696, Q14643, A0A0U1RRH1, Q8IWX8, P19174, H3BM67, C9J0K6,A4UJ43, O15247	0.0172993	0.980929
GO:0051282	regulation of sequestering of calcium ion	P	2	22	58	6054	3.44828	0.363396	over	A4UJ43, O15247	B2R983, B2RDW0, A8K8B9, Q9UPJ8, Q12955, P22694, Q12797, D6R938, A0A0G2JH68, P62942, B3KW93, M0R116, Q15118, Q9Y696, Q14643, A0A0U1RRH1, Q8IWX8, P19174, H3BM67, C9J0K6,A4UJ43, O15247	0.0172993	0.980929
GO:0051209	release of sequestered calcium ion into cytosol	P	2	22	58	6054	3.44828	0.363396	over	A4UJ43, O15247	B2R983, B2RDW0, A8K8B9, Q9UPJ8, Q12955, P22694, Q12797, D6R938, A0A0G2JH68, P62942, B3KW93, M0R116, Q15118, Q9Y696, Q14643, A0A0U1RRH1, Q8IWX8, P19174, H3BM67, C9J0K6,A4UJ43, O15247	0.0172993	0.980929
GO:0030669	clathrin-coated endocytic vesicle membrane	C	2	22	58	6054	3.44828	0.363396	over	B8ZZZ1, B4DPP0	O94973, H0YEY8, A0A024R2H0, B3KNH5, Q10567, P53680, J3QLN2, Q00610, Q7Z677, O43747, A8K2T7, A0A087WTM7, A0A0G2JQM1, B4DFM1, H0UID5, P09496, P61966, O95782, Q9UH51, A0A024R5L7,B8ZZZ1, B4DPP0	0.0172993	0.980929
GO:0032412	regulation of ion transmembrane transporter activity	P	3	61	58	6054	5.17241	1.0076	over	A4UJ43, A0A0D9SG53, O15247	Q5TG80, Q86VR1, P46939, Q13586, Q13546, B2R983, B4DZF1, A6NFQ2, Q5SWX3, B8ZZ67, B2RDW0, Q99653, A8K8B9, Q12955, A0A024R281, A0A024R258, H0Y8B3, Q6ZT73, P22694, B2R6A3, P12814, P31947, P31946, Q12797, B7Z2N5, D6R938, B4DIN7, P27348, P62942, O43865, D3DVR8, Q04917, O43707, D3DUP2, Q9BXT2, Q09666, P63104, Q8N335, Q9Y4C2, H7C5K2, Q9HD47, P41208, A0A0S2Z3C0, P35754, Q86YM6, Q9Y376, P05026, P61981, A0A…	0.0176468	0.980929
GO:0016020	membrane	C	35	2915	58	6054	60.3448	48.15	over	P55795, Q8NFR3, B4DVJ1, Q9UJC3, Q7Z443, P16422, P26447, Q96B43, P43355, Q99536, E9PJK1, P25815, B8ZZZ1, Q96KR6, A0A024RDE8, P15144, P37059, Q96DZ4, Q2TU64, B7Z4U6, Q06787, D6RA82, A0A0D9SG53, P05787, P07205, C9JSQ1, O15247, B2R8A2, Q59H46, B4DPP0, Q9HBR0, P08727, B3KUB6, Q9H617, B7ZL93	B7Z7F5, A0A024RB99, P98198, F8WCQ4, E7ENI6, A0A087X0K9, P51970, P08758, P08754, P06576, Q86W92, Q32Q12, P49662, P55084, Q53SV6, Q99848, A0A024RAV5, A0A024RAV4, Q15836, P98172, P39880, Q6P4A7, P55072, Q5TG80, D3DP46, Q13641, A6PVJ3, Q9NRF8, F8VV56, P55060, F8VV52, Q8WVQ1, Q86VU2, O75976, O75970, P04350, Q99808, Q96GX3, P08708, Q13619, Q9BSJ8, A6NGP5, B2R9T9, Q86VS8, A0A024R595, Q9BSJ2, H7C1G1, J3Q…	0.0185954	0.980929
GO:0033993	response to lipid	P	4	114	58	6054	6.89655	1.88305	over	A4UJ43, P37059, D6RA82, P08727	X5CF57, K7EIJ0, H7C134, F8WC54, Q13573, P26038, A8MTU8, Q53RS1, H7C0E2, Q53EU2, Q86UE4, B4DYT5, Q06310, Q15648, Q8N995, Q8N8W2, P35241, A0A087WYV5, B4DKZ2, Q96EB6, P12931, A0A0S2A5C8, B4DL06, P04083, V9GYE8, B7Z3V1, B4DWZ7, Q63ZY3, D2CFK5, Q12792, P19838, F1DAL8, O60885, Q6PHZ7, B2RB95, Q5U071, B7ZKQ9, A8KAP9, Q00653, A8K548, M0R1V8, Q15291, B2RA70, Q13085, A8K4G7, B4DHN0, Q8N4S8, Q59FI5, O15294,…	0.0187151	0.980929
GO:0051208	sequestering of calcium ion	P	2	23	58	6054	3.44828	0.379914	over	A4UJ43, O15247	Q53G71, B2R983, B2RDW0, A8K8B9, Q9UPJ8, Q12955, P22694, Q12797, D6R938, A0A0G2JH68, P62942, B3KW93, M0R116, Q15118, Q9Y696, Q14643, A0A0U1RRH1, Q8IWX8, P19174, H3BM67, C9J0K6,A4UJ43, O15247	0.0187709	0.980929
GO:0030837	negative regulation of actin filament polymerization	P	2	23	58	6054	3.44828	0.379914	over	B7Z4U6, B4DU58	B1AK87, A0A087WYV5, Q12929, G5EA42, Q12792, P58546, E7EV99, P07737, C9J712, Q9Y6U3, Q9Y6D6, Q14678, P52907, H0YMA2, Q5HYL6, P47755, Q6IBS0, A0A0U1RQQ1, C9JJV6, F8W7U3, C9J0J7,B7Z4U6, B4DU58	0.0187709	0.980929
GO:0045746	negative regulation of Notch signaling pathway	P	1	2	58	6054	1.72414	0.033036	over	P43355	Q53EU2,P43355	0.0189805	0.980929
GO:0033629	negative regulation of cell adhesion mediated by integrin	P	1	2	58	6054	1.72414	0.033036	over	P16422	A7E2E5,P16422	0.0189805	0.980929
GO:0060390	regulation of SMAD protein import into nucleus	P	1	2	58	6054	1.72414	0.033036	over	D3DSV0	C9JQS8,D3DSV0	0.0189805	0.980929
GO:0090527	actin filament reorganization	P	1	2	58	6054	1.72414	0.033036	over	B7Z4U6	F5GWN4,B7Z4U6	0.0189805	0.980929
GO:0045026	plasma membrane fusion	P	1	2	58	6054	1.72414	0.033036	over	B4DPP0	B7Z5J7,B4DPP0	0.0189805	0.980929
GO:0005739	mitochondrion	C	2	836	58	6054	3.44828	13.8091	under	B4DH89, C9JSQ1	A0A024RB99, F8WCQ4, P51970, P06576, J3QR58, Q32Q12, P49662, P55084, Q09161, B3KPZ7, Q96GW9, Q9H2W6, A0A024R4X0, B3KPX5, A0A024RAQ3, B3KPX1, Q53G79, Q9BSH4, O75947, Q9UES0, Q9H2U2, P27824, Q3ZCQ8, V9HW35, Q53G19, P13674, P11498, P62140, Q9UEH5, P62136, Q96TC7, P09132, B3KPI5, F8WBY6, B8ZZV5, P28288, H7C155, B4DMX1, X6RKS3, Q6VRU3, Q9NQP4, E9PN17, B8ZZS4, H7C0R7, Q9BRT2, Q99797, Q49AE1, Q15785, Q54…	0.00748619	0.838809
GO:0005672	transcription factor TFIIA complex	C	1	2	58	6054	1.72414	0.033036	over	H0Y6D8	P52655,H0Y6D8	0.0189805	0.980929
GO:0051409	response to nitrosative stress	P	1	2	58	6054	1.72414	0.033036	over	A4UJ43	F8VW29,A4UJ43	0.0189805	0.980929
GO:0035878	nail development	P	1	2	58	6054	1.72414	0.033036	over	Q59H46	P23229,Q59H46	0.0189805	0.980929
GO:0042989	sequestering of actin monomers	P	1	2	58	6054	1.72414	0.033036	over	B7Z4U6	Q9Y6U3,B7Z4U6	0.0189805	0.980929
GO:0031974	membrane-enclosed lumen	C	14	2369	58	6054	24.1379	39.1312	under	P55795, A0A024RC76, B4E200, P43355, B4DLV6, Q8IVQ8, H0Y6D8, B4DH89, A0A087X0Q6, Q06787, Q9H8M2, D3DSV0, C9J2P0, B4DU58	A0A024RB99, H7C1M2, P51970, Q15847, P08754, P14174, P06576, B4E014, J3QR58, B1AKN7, P55084, Q99848, A0A024RAV4, P98175, J3QR41, P55072, Q9NRG0, Q9NRF9, Q09161, B7Z7B0, F8VV56, P55060, B2R9V7, B4DNM0, Q86VU2, Q9H2Y7, A0A024RB49, B3KPZ7, Q53T40, Q8WW12, Q13627, Q5QJE6, Q86W56, Q96GX5, P04350, F8W733, Q01664, Q13619, Q13617, A0A024R595, Q9BSJ2, C9JII4, J3QR09, Q86W42, Q96GW9, Q9H2W6, P55036, Q01658,…	0.00638523	0.838809
GO:0055086	nucleobase-containing small molecule metabolic process	P	0	440	58	6054	0	7.26792	under		P08754, P06576, Q32Q12, A0A024RAV5, B2R9X3, P55072, Q9NRF8, Q13630, E9PNF5, A0A024R595, O75962, A0A024RAQ3, E9PAK5, B2R9S6, O75947, P25685, V9HW35, Q9H2M9, Q92796, D6RIT0, B7Z722, Q9NR50, Q16222, E9PN68, Q53FI8, K7EIN2, A2IDA3, F2Z2E2, P34931, P30566, E9PN17, B7Z6H4, B4DN40, P30520, Q99766, Q96T88, Q15751, P26038, Q8NFQ8, P51841, O95433, Q13503, A8K9A5, Q96G61, P0DMV8, Q658U3, B7Z5Y3, R4GMU8, P23…	0.0123022	0.971515
GO:0004618	phosphoglycerate kinase activity	F	1	2	58	6054	1.72414	0.033036	over	P07205	P00558,P07205	0.0189805	0.980929
GO:0005094	Rho GDP-dissociation inhibitor activity	F	1	2	58	6054	1.72414	0.033036	over	H0YGX7	J3KRE2,H0YGX7	0.0189805	0.980929
GO:0030619	U1 snRNA binding	F	1	2	58	6054	1.72414	0.033036	over	A0A024RC76	P09234,A0A024RC76	0.0189805	0.980929
GO:0004303	estradiol 17-beta-dehydrogenase activity	F	1	2	58	6054	1.72414	0.033036	over	P37059	P56937,P37059	0.0189805	0.980929
GO:0046813	virion attachment, binding of host cell surface receptor	P	1	2	58	6054	1.72414	0.033036	over	E9PJK1	P05362,E9PJK1	0.0189805	0.980929
GO:0008297	single-stranded DNA exodeoxyribonuclease activity	F	1	2	58	6054	1.72414	0.033036	over	A0A024RC76	Q9BQP7,A0A024RC76	0.0189805	0.980929
GO:0008296	3'-5'-exodeoxyribonuclease activity	F	1	2	58	6054	1.72414	0.033036	over	A0A024RC76	Q5TZT0,A0A024RC76	0.0189805	0.980929
GO:0022898	regulation of transmembrane transporter activity	P	3	63	58	6054	5.17241	1.04063	over	A4UJ43, A0A0D9SG53, O15247	Q5TG80, Q86VR1, P46939, Q13586, Q13546, B2R983, B4DZF1, A6NFQ2, Q5SWX3, B8ZZ67, B2RDW0, Q99653, A8K8B9, Q12955, A0A024R2C4, B2R6X6, A0A024R281, A0A024R258, H0Y8B3, Q6ZT73, P22694, B2R6A3, P12814, P31947, P31946, Q12797, B7Z2N5, D6R938, B4DIN7, P27348, P62942, O43865, D3DVR8, Q04917, O43707, D3DUP2, Q9BXT2, Q09666, P63104, Q8N335, Q9Y4C2, H7C5K2, Q9HD47, P41208, A0A0S2Z3C0, P35754, Q86YM6, Q9Y376,…	0.0191155	0.980929
GO:0042995	cell projection	C	10	545	58	6054	17.2414	9.00231	over	Q7Z443, P26447, P25815, A0A024RDE8, B7Z4U6, D6RA82, O15247, Q59H46, B3KUB6, B4DU58	A0A087X0K9, P08758, P08754, Q32Q12, P98179, Q15836, Q5TG80, Q15814, O75970, P04350, Q96GX3, Q86VR1, A0A024RB10, V9HW89, A0A024RAM4, P43034, O75911, B7Z6Y2, F2Z329, Q9NQX4, Q92796, P62166, Q3ZCM7, B7Z722, P46939, E9PMV1, E9PN68, P42566, A0A024R4H4, H7C164, F2Z2E2, Q9NR12, Q96GD0, Q49AE1, B9EK39, P08670, Q99767, P26038, Q96T51, B8ZZK5, P51841, A0A0A1HAV9, Q53RS1, P10909, P51809, P57105, P33176, R4G…	0.019418	0.980929
GO:0044767	single-organism developmental process	P	17	1160	58	6054	29.3103	19.1609	over	H0YGX7, A4UJ43, Q9UJC3, Q7Z443, P26447, A0A024RDE8, B4DH89, A0A087X0Q6, Q96DZ4, B7Z4U6, D6RA82, A0A0D9SG53, Q59H46, B4DPP0, P08727, B3KUB6, B4DU58	B7Z7F5, P08758, P14174, P06576, B1AKN7, P49662, A0A024RAV5, P98172, P39880, F8VV56, F8VV52, Q15814, Q15813, B2R9V7, B4DNM0, Q86VU2, A0A024RB49, Q53T40, P04350, Q13619, Q86VS8, O75962, P55036, F5H4V9, Q13608, B2R9S6, F2Z2V0, Q03828, Q86VR2, Q8WVM8, A0A024RB10, Q53G71, Q52LB7, A0A024RAM4, P43034, O75911, K7EIX4, P78527, B7Z6Y2, Q6NXE6, F2Z329, H7C1A0, P27824, P21281, B3KQ29, Q6UXN9, A0A024RAJ5, P62…	0.0201396	0.980929
GO:0060402	calcium ion transport into cytosol	P	2	24	58	6054	3.44828	0.396432	over	A4UJ43, O15247	Q86VR1, B2R983, B2RDW0, A8K8B9, Q9UPJ8, Q12955, P22694, Q12797, D6R938, A0A0G2JH68, P62942, B3KW93, M0R116, Q15118, Q9Y696, Q14643, Q14573, A0A0U1RRH1, Q8IWX8, P19174, H3BM67, C9J0K6,A4UJ43, O15247	0.0202872	0.980929
GO:0060401	cytosolic calcium ion transport	P	2	24	58	6054	3.44828	0.396432	over	A4UJ43, O15247	Q86VR1, B2R983, B2RDW0, A8K8B9, Q9UPJ8, Q12955, P22694, Q12797, D6R938, A0A0G2JH68, P62942, B3KW93, M0R116, Q15118, Q9Y696, Q14643, Q14573, A0A0U1RRH1, Q8IWX8, P19174, H3BM67, C9J0K6,A4UJ43, O15247	0.0202872	0.980929
GO:0051828	entry into other organism involved in symbiotic interaction	P	2	24	58	6054	3.44828	0.396432	over	E9PJK1, B7Z4U6	B3KPN7, P42566, H7C134, A5YM53, B2R907, A0A0S2A5C8, Q12899, Q3SYF1, P27487, B4DIN7, A8K486, O60493, A0A0S2Z3I6, A0A0A0MSB8, P07237, C9JKI3, Q96J02, P09382, Q14258, Q9BTY2, K7EKE8, H3BLV0,E9PJK1, B7Z4U6	0.0202872	0.980929
GO:0051806	entry into cell of other organism involved in symbiotic interaction	P	2	24	58	6054	3.44828	0.396432	over	E9PJK1, B7Z4U6	B3KPN7, P42566, H7C134, A5YM53, B2R907, A0A0S2A5C8, Q12899, Q3SYF1, P27487, B4DIN7, A8K486, O60493, A0A0S2Z3I6, A0A0A0MSB8, P07237, C9JKI3, Q96J02, P09382, Q14258, Q9BTY2, K7EKE8, H3BLV0,E9PJK1, B7Z4U6	0.0202872	0.980929
GO:0052192	movement in environment of other organism involved in symbiotic interaction	P	2	24	58	6054	3.44828	0.396432	over	E9PJK1, B7Z4U6	B3KPN7, P42566, H7C134, A5YM53, B2R907, A0A0S2A5C8, Q12899, Q3SYF1, P27487, B4DIN7, A8K486, O60493, A0A0S2Z3I6, A0A0A0MSB8, P07237, C9JKI3, Q96J02, P09382, Q14258, Q9BTY2, K7EKE8, H3BLV0,E9PJK1, B7Z4U6	0.0202872	0.980929
GO:0052126	movement in host environment	P	2	24	58	6054	3.44828	0.396432	over	E9PJK1, B7Z4U6	B3KPN7, P42566, H7C134, A5YM53, B2R907, A0A0S2A5C8, Q12899, Q3SYF1, P27487, B4DIN7, A8K486, O60493, A0A0S2Z3I6, A0A0A0MSB8, P07237, C9JKI3, Q96J02, P09382, Q14258, Q9BTY2, K7EKE8, H3BLV0,E9PJK1, B7Z4U6	0.0202872	0.980929
GO:0044409	entry into host	P	2	24	58	6054	3.44828	0.396432	over	E9PJK1, B7Z4U6	B3KPN7, P42566, H7C134, A5YM53, B2R907, A0A0S2A5C8, Q12899, Q3SYF1, P27487, B4DIN7, A8K486, O60493, A0A0S2Z3I6, A0A0A0MSB8, P07237, C9JKI3, Q96J02, P09382, Q14258, Q9BTY2, K7EKE8, H3BLV0,E9PJK1, B7Z4U6	0.0202872	0.980929
GO:0030834	regulation of actin filament depolymerization	P	2	24	58	6054	3.44828	0.396432	over	B7Z4U6, B4DU58	B1AK87, Q96GD0, Q12929, F6RFD5, P12814, G5EA42, P58546, F8VQE1, B7Z2N5, E7EV99, Q9Y6U3, O43707, P52907, H0YMA2, Q5HYL6, Q5T123, P47755, A0A0S2Z3C0, Q9Y281, A0A0U1RQQ1, F8W7U3, P23528,B7Z4U6, B4DU58	0.0202872	0.980929
GO:0030260	entry into host cell	P	2	24	58	6054	3.44828	0.396432	over	E9PJK1, B7Z4U6	B3KPN7, P42566, H7C134, A5YM53, B2R907, A0A0S2A5C8, Q12899, Q3SYF1, P27487, B4DIN7, A8K486, O60493, A0A0S2Z3I6, A0A0A0MSB8, P07237, C9JKI3, Q96J02, P09382, Q14258, Q9BTY2, K7EKE8, H3BLV0,E9PJK1, B7Z4U6	0.0202872	0.980929
GO:0006749	glutathione metabolic process	P	2	25	58	6054	3.44828	0.41295	over	A4UJ43, O15247	Q99735, B2R983, B2RCZ7, A0JLT0, K7ERP4, B2R5M8, P48735, A7E261, Q6NSD4, P48637, B4DV28, Q59FU9, O14880, P48507, P48506, O75223, B4DT01, P00390, Q9Y2Q3, F5H7F6, Q2Q9H2, B4DPY0, P09211,A4UJ43, O15247	0.0218466	0.980929
GO:0006139	nucleobase-containing compound metabolic process	P	14	2340	58	6054	24.1379	38.6521	under	P55795, A0A024RC76, P16422, A0A087WXU6, P43355, E9PJK1, B4DLV6, H0Y6D8, A0A087X0Q6, Q9H8M2, D6RA82, A0A0D9SG53, D3DSV0, C9J2P0	H7C1M2, Q15847, P08758, P08754, P06576, B4E014, J3QR58, B1AKN7, Q32Q12, A0A024RAV5, A0A024RAV4, P98179, P98175, P39880, B2R9X3, J3QR41, P55072, Q9NRG0, Q9NRF9, Q9NRF8, Q09161, F8VV52, Q13630, B4DNM0, Q86VU2, A0A024RB49, Q53T40, Q13627, E9PNF5, Q86W56, Q99808, F8W733, Q01664, Q8WW01, P08708, Q13619, Q13617, A0A024R595, C9JII4, J3QR09, Q86W42, Q96GW9, O75962, B3KQ99, B3KPX5, Q01658, A0A024RAQ3, Q7K…	0.00759891	0.838809
GO:0043233	organelle lumen	C	14	2339	58	6054	24.1379	38.6356	under	P55795, A0A024RC76, B4E200, P43355, B4DLV6, Q8IVQ8, H0Y6D8, B4DH89, A0A087X0Q6, Q06787, Q9H8M2, D3DSV0, C9J2P0, B4DU58	A0A024RB99, H7C1M2, Q15847, P08754, P14174, P06576, B4E014, J3QR58, B1AKN7, P55084, Q99848, A0A024RAV4, P98175, J3QR41, P55072, Q9NRG0, Q9NRF9, Q09161, B7Z7B0, F8VV56, P55060, B2R9V7, B4DNM0, Q86VU2, Q9H2Y7, A0A024RB49, B3KPZ7, Q53T40, Q8WW12, Q13627, Q5QJE6, Q86W56, Q96GX5, F8W733, Q01664, Q13619, Q13617, A0A024R595, Q9BSJ2, C9JII4, J3QR09, Q86W42, Q96GW9, Q9H2W6, P55036, Q01658, A0A024RAQ3, B3K…	0.00764398	0.838809
GO:0030042	actin filament depolymerization	P	2	25	58	6054	3.44828	0.41295	over	B7Z4U6, B4DU58	B1AK87, Q96GD0, Q12929, F6RFD5, P12814, G5EA42, P58546, F8VQE1, B7Z2N5, E7EV99, Q7RTP6, Q9Y6U3, O43707, P52907, H0YMA2, Q5HYL6, Q5T123, P47755, A0A0S2Z3C0, Q9Y281, A0A0U1RQQ1, F8W7U3, P23528,B7Z4U6, B4DU58	0.0218466	0.980929
GO:0065007	biological regulation	P	43	3803	58	6054	74.1379	62.818	over	H0YGX7, P55795, Q9NUU6, A0A024RC76, B4DVJ1, A4UJ43, Q7Z443, B4E200, P16422, P26447, A0A087WXU6, Q96B43, P43355, Q99536, E9PJK1, B4DLV6, B2RA03, P25815, B8ZZZ1, A0A024RDE8, P15144, P37059, Q8IVQ8, H0Y6D8, B4DH89, A0A087X0Q6, Q05DN2, Q96DZ4, B7Z4U6, Q06787, Q9H8M2, D6RA82, A0A0D9SG53, P05787, O15247, B2R8A2, Q59H46, D3DSV0, B4DPP0, P08727, B3KUB6, C9J2P0, B4DU58	P98198, F8WCQ4, E9PNK6, H7C1M2, E7ENI6, A0A087X0K9, Q8WW59, Q15847, P08758, P08754, P14174, P06576, J3QR58, B1AKN7, Q32Q12, P49662, Q53SV6, A0A024RAV5, A0A024RAV4, P98179, P98175, Q15836, P98173, P98172, P39880, J3QR41, P55072, Q5TG80, D3DP46, Q13641, Q5JW54, Q09161, B7Z7B0, F8VV56, P55060, F8VV52, Q8WVQ1, B2R9V7, B4DNM0, Q86VU2, Q9H2Y7, B7Z7A4, A0A024RB49, B3KPZ7, Q53T40, Q13627, O75976, Q96GX9,…	0.0219421	0.980929
GO:0032409	regulation of transporter activity	P	3	67	58	6054	5.17241	1.10671	over	A4UJ43, A0A0D9SG53, O15247	Q5TG80, Q86VR1, P46939, Q13586, Q13546, B2R983, B4DZF1, A6NFQ2, Q5SWX3, B8ZZ67, B2RDW0, Q99653, A8K8B9, Q12955, A0A024R2C4, B2R6X6, A0A024R281, A0A024R258, H0Y8B3, Q6ZT73, P22694, B2R6A3, P12814, P31947, P31946, Q12797, B7Z2N5, D6R938, B4DIN7, P27348, P62942, O43865, D3DVR8, Q04917, O43707, D3DUP2, Q03164, Q9BXT2, B4DFV1, Q09666, P63104, Q8N335, Q9Y4C2, H7C5K2, Q9HD47, P41208, Q8TD98, A0A0S2Z3C0,…	0.0222244	0.980929
GO:0051704	multi-organism process	P	11	647	58	6054	18.9655	10.6871	over	H0YGX7, A0A024RC76, B4E200, E9PJK1, B8ZZZ1, P15144, H0Y6D8, A0A087X0Q6, Q05DN2, B7Z4U6, D6RA82	P08758, P55072, Q09161, B7Z7B0, A0A024RB49, Q01664, P08708, J3QR09, Q86W42, P55036, A0A024RAP0, P15880, F5H4Q5, L0R849, P13693, P21283, P21281, P62195, P62191, B2R9L6, Q53FP0, P11498, B3KPN7, Q8WVC2, A8K9U6, Q92769, Q9NQT4, A0A024RAC6, Q9BRZ2, P42566, A0A0A0N0L3, P09104, B8ZZU8, B2R9B4, Q53FE7, R4GNH3, H7C134, C9JUM8, H7C0Q6, Q49AE1, F8WC54, B4DZM3, A8K9J7, B4DMR3, Q13573, B4DZJ7, B7Z6C9, Q86V81,…	0.0230434	0.980929
GO:0045334	clathrin-coated endocytic vesicle	C	2	26	58	6054	3.44828	0.429468	over	B8ZZZ1, B4DPP0	O94973, B4DM44, Q12965, H0YEY8, A0A024R2H0, B3KNH5, Q10567, P53680, J3QLN2, Q00610, Q15286, Q7Z677, O43747, A8K2T7, A0A087WTM7, A0A0G2JQM1, B4DFM1, H0UID5, P09496, A0A0A0MRM8, P61966, O95782, Q9UH51, A0A024R5L7,B8ZZZ1, B4DPP0	0.0234473	0.980929
GO:0032272	negative regulation of protein polymerization	P	2	26	58	6054	3.44828	0.429468	over	B7Z4U6, B4DU58	B1AK87, B4DM33, A0A087WYV5, Q12929, B5BU83, G5EA42, Q12792, P58546, E7EV99, P07737, C9J712, Q9Y6U3, Q9Y6D6, Q14678, P52907, H0YMA2, Q5HYL6, P47755, Q6IBS0, A0A0U1RQQ1, Q9BTW9, C9JJV6, F8W7U3, C9J0J7,B7Z4U6, B4DU58	0.0234473	0.980929
GO:0034754	cellular hormone metabolic process	P	2	26	58	6054	3.44828	0.429468	over	P37059, B4DH89	O75911, Q15738, Q15648, B2R761, B2R659, B2R5T2, Q14849, B7Z1M0, C9J719, D6RCD0, E9PGI0, H0YMG7, Q8IZV5, A0A0A0MTN9, P14550, P10109, A0A0C4DGV7, E7EQL1, B3KT84, B3KT14, B4DDF8, Q02338, P30837, P56937,P37059, B4DH89	0.0234473	0.980929
GO:0010639	negative regulation of organelle organization	P	4	123	58	6054	6.89655	2.03171	over	Q99536, B7Z4U6, C9J2P0, B4DU58	J3QR41, Q7KZ85, Q8WVA9, B1AJY7, B1AK87, A0A087X020, R4GND1, Q96ST3, B4DZF6, B4DZF1, E9PM65, Q9BR76, Q9H1A4, Q86TZ8, B4DM33, B4DYG2, A0A087WYV5, P56545, Q12929, B5BU83, Q96EH3, P42345, B4DL80, Q96EB6, B3KNC3, Q15545, F8WA11, B2R6X6, Q13315, Q96E52, A0A024R258, P60983, P07992, B3KMP2, B3KN06, A8K787, Q12834, H3BTU7, Q13257, E5RGW4, G5EA42, Q12792, Q96PK6, P58546, F8VQE1, F5H0F9, O95071, H3BT57, Q13…	0.023452	0.980929
GO:0051238	sequestering of metal ion	P	2	27	58	6054	3.44828	0.445986	over	A4UJ43, O15247	Q53G71, B2R983, Q8NEW0, B2RDW0, A8K8B9, Q9UPJ8, Q12955, P22694, Q12797, D6R938, A0A0G2JH68, P62942, Q9Y6M5, B3KW93, M0R116, Q15118, Q9Y696, Q14643, G3V1D1, O14617, A0A0U1RRH1, Q8IWX8, P19174, H3BM67, C9J0K6,A4UJ43, O15247	0.0250878	0.980929
GO:0044700	single organism signaling	P	24	1870	58	6054	41.3793	30.8887	over	H0YGX7, A0A024RC76, A4UJ43, P16422, P26447, Q96B43, P43355, E9PJK1, B2RA03, P25815, A0A024RDE8, P15144, Q05DN2, B7Z4U6, Q9H8M2, D6RA82, O15247, B2R8A2, Q59H46, D3DSV0, B4DPP0, P08727, B3KUB6, C9J2P0	E9PNK6, E7ENI6, A0A087X0K9, P08758, P08754, P14174, P06576, Q32Q12, P49662, Q53SV6, A0A024RAV5, Q15836, P98172, J3QR41, P55072, Q5TG80, D3DP46, Q5JW54, F8VV56, P55060, F8VV52, Q8WVQ1, Q86VU2, Q9H2Y7, Q53T40, Q13627, O75970, Q96GX5, P04350, Q96GX3, F8W733, Q01664, Q13619, Q13617, Q9BSJ8, A0A024R595, O75962, P55036, E9PAK5, Q13608, Q13606, B2R9S6, F2Z2V0, Q03828, Q8NGK3, K4DI93, A0A024RB10, F2Z2U4,…	0.0253722	0.980929
GO:0023052	signaling	P	24	1872	58	6054	41.3793	30.9217	over	H0YGX7, A0A024RC76, A4UJ43, P16422, P26447, Q96B43, P43355, E9PJK1, B2RA03, P25815, A0A024RDE8, P15144, Q05DN2, B7Z4U6, Q9H8M2, D6RA82, O15247, B2R8A2, Q59H46, D3DSV0, B4DPP0, P08727, B3KUB6, C9J2P0	E9PNK6, E7ENI6, A0A087X0K9, P08758, P08754, P14174, P06576, Q32Q12, P49662, Q53SV6, A0A024RAV5, Q15836, P98172, J3QR41, P55072, Q5TG80, D3DP46, Q5JW54, F8VV56, P55060, F8VV52, Q8WVQ1, Q86VU2, Q9H2Y7, Q53T40, Q13627, O75970, Q96GX5, P04350, Q96GX3, F8W733, Q01664, Q13619, Q13617, Q9BSJ8, A0A024R595, O75962, P55036, E9PAK5, Q13608, Q13606, B2R9S6, F2Z2V0, Q03828, Q8NGK3, K4DI93, A0A024RB10, F2Z2U4,…	0.0256142	0.980929
GO:0030855	epithelial cell differentiation	P	4	127	58	6054	6.89655	2.09779	over	A4UJ43, P07205, O15247, P08727	Q32Q12, A0A024RAV5, B3KPX1, P13645, B4DMY4, Q49AE1, F8WC54, P26038, Q53EU2, B4DYT5, P08581, Q86TY5, Q15648, P16152, B4DYI8, A8K8B2, Q6NVH9, P35241, A0A087WYV5, Q12965, P11233, B4DL06, P04083, P04075, A0A024R1X8, P60953, P15531, A4D1Z4, P11142, B2R6A3, Q562R1, P31942, Q562M3, D9ZGF8, O43930, A8K644, F1DAL8, B4DVP5, O60869, B2RB95, B2RAQ8, P61224, P09972, P50995, Q01105, A8K588, O00712, P01112, Q15…	0.0257371	0.980929
GO:0050789	regulation of biological process	P	41	3627	58	6054	70.6897	59.9108	over	H0YGX7, P55795, Q9NUU6, A0A024RC76, A4UJ43, Q7Z443, B4E200, P16422, P26447, A0A087WXU6, Q96B43, P43355, Q99536, E9PJK1, B4DLV6, B2RA03, P25815, B8ZZZ1, A0A024RDE8, P15144, Q8IVQ8, H0Y6D8, B4DH89, A0A087X0Q6, Q05DN2, Q96DZ4, B7Z4U6, Q06787, Q9H8M2, D6RA82, A0A0D9SG53, P05787, O15247, B2R8A2, Q59H46, D3DSV0, B4DPP0, P08727, B3KUB6, C9J2P0, B4DU58	P98198, F8WCQ4, E9PNK6, H7C1M2, E7ENI6, A0A087X0K9, Q8WW59, Q15847, P08758, P08754, P14174, P06576, J3QR58, B1AKN7, Q32Q12, P49662, Q53SV6, A0A024RAV5, A0A024RAV4, P98179, P98175, Q15836, P98173, P98172, P39880, J3QR41, P55072, Q5TG80, D3DP46, Q13641, Q5JW54, Q09161, B7Z7B0, F8VV56, P55060, F8VV52, Q8WVQ1, B2R9V7, B4DNM0, Q86VU2, Q9H2Y7, B7Z7A4, A0A024RB49, B3KPZ7, Q53T40, Q13627, O75976, Q96GX9,…	0.026355	0.980929
GO:2001257	regulation of cation channel activity	P	2	28	58	6054	3.44828	0.462504	over	A4UJ43, O15247	Q86VR1, Q13586, B2R983, B4DZF1, B8ZZ67, B2RDW0, A8K8B9, Q12955, A0A024R258, Q6ZT73, P22694, P12814, Q12797, B7Z2N5, D6R938, P62942, D3DVR8, O43707, Q09666, H7C5K2, P41208, A0A0S2Z3C0, Q86YM6, C9JKI3, P25774, C9J0K6,A4UJ43, O15247	0.0267666	0.980929
GO:0016765	transferase activity, transferring alkyl or aryl (other than methyl) groups	F	2	28	58	6054	3.44828	0.462504	over	A4UJ43, O15247	Q99735, B2R983, B2RE48, P49366, P49356, P49354, B2R6J3, P08397, P53609, Q5T4U8, Q59FU9, O14880, P19623, C9J6G3, Q6FHF7, I6L9K0, B4DRL9, P52788, Q5T0A6, B7Z9R8, Q9Y2Q3, F5H7F6, P14324, O00116, P31153, P09211,A4UJ43, O15247	0.0267666	0.980929
GO:0001667	ameboidal cell migration	P	3	74	58	6054	5.17241	1.22233	over	H0YGX7, P25815, D6RA82	E9PMY3, Q9NQW6, F8WC54, P57105, Q53EU2, Q8WUI4, Q86UJ2, B4DYU4, C9JU34, Q9BR76, P08581, Q5H9A7, A0A087WZ85, A0A087WYV5, P12931, F8WA11, B3KN06, P27487, O43930, P67870, F1DAL8, Q5U071, B4DJ12, B7ZKQ9, B2RAM2, E7EUY6, A0A087WW56, P07737, H0YBP1, A8KAE3, B2RA70, B3KWS6, C9J712, O75340, Q59FI5, J3KRE2, Q5T3J6, A0A087WUK4, Q15139, Q59F20, Q9NX84, A0M8Q2, B3KVH4, P24468, B4DG79, H0Y465, P35908, J3KPM9,…	0.0281912	0.980929
GO:0007184	SMAD protein import into nucleus	P	1	3	58	6054	1.72414	0.049554	over	D3DSV0	C9JQS8, P05412,D3DSV0	0.0282025	0.980929
GO:0060177	regulation of angiotensin metabolic process	P	1	3	58	6054	1.72414	0.049554	over	P15144	B7Z4S4, Q5U000,P15144	0.0282025	0.980929
GO:2000648	positive regulation of stem cell proliferation	P	1	3	58	6054	1.72414	0.049554	over	P16422	F5H4V9, Q96GM5,P16422	0.0282025	0.980929
GO:0006600	creatine metabolic process	P	1	3	58	6054	1.72414	0.049554	over	C9JSQ1	P12277, Q14353,C9JSQ1	0.0282025	0.980929
GO:0002003	angiotensin maturation	P	1	3	58	6054	1.72414	0.049554	over	P15144	B7Z4S4, Q5U000,P15144	0.0282025	0.980929
GO:0002002	regulation of angiotensin levels in blood	P	1	3	58	6054	1.72414	0.049554	over	P15144	B7Z4S4, Q5U000,P15144	0.0282025	0.980929
GO:2000242	negative regulation of reproductive process	P	1	3	58	6054	1.72414	0.049554	over	H0YGX7	Q5H9A7, J3KRE2,H0YGX7	0.0282025	0.980929
GO:0070695	FHF complex	C	1	3	58	6054	1.72414	0.049554	over	Q9UJC3	Q86VS8, K7EK29,Q9UJC3	0.0282025	0.980929
GO:2000047	regulation of cell-cell adhesion mediated by cadherin	P	1	3	58	6054	1.72414	0.049554	over	P16422	A2VCL5, H7C598,P16422	0.0282025	0.980929
GO:0070013	intracellular organelle lumen	C	14	2324	58	6054	24.1379	38.3878	under	P55795, A0A024RC76, B4E200, P43355, B4DLV6, Q8IVQ8, H0Y6D8, B4DH89, A0A087X0Q6, Q06787, Q9H8M2, D3DSV0, C9J2P0, B4DU58	A0A024RB99, H7C1M2, Q15847, P08754, P14174, P06576, B4E014, J3QR58, B1AKN7, P55084, Q99848, A0A024RAV4, P98175, J3QR41, P55072, Q9NRG0, Q9NRF9, Q09161, B7Z7B0, F8VV56, P55060, B2R9V7, B4DNM0, Q86VU2, Q9H2Y7, A0A024RB49, B3KPZ7, Q53T40, Q8WW12, Q13627, Q5QJE6, Q86W56, Q96GX5, F8W733, Q01664, Q13619, Q13617, A0A024R595, Q9BSJ2, C9JII4, J3QR09, Q86W42, Q96GW9, Q9H2W6, P55036, Q01658, A0A024RAQ3, B3K…	0.00834721	0.838809
GO:0044331	cell-cell adhesion mediated by cadherin	P	1	3	58	6054	1.72414	0.049554	over	P16422	A2VCL5, H7C598,P16422	0.0282025	0.980929
GO:1900750	oligopeptide binding	F	1	3	58	6054	1.72414	0.049554	over	A4UJ43	P48637, E9PHS0,A4UJ43	0.0282025	0.980929
GO:1901164	negative regulation of trophoblast cell migration	P	1	3	58	6054	1.72414	0.049554	over	H0YGX7	Q5H9A7, J3KRE2,H0YGX7	0.0282025	0.980929
GO:1990000	amyloid fibril formation	P	1	3	58	6054	1.72414	0.049554	over	B7Z4U6	Q13546, P62942,B7Z4U6	0.0282025	0.980929
GO:0070293	renal absorption	P	1	3	58	6054	1.72414	0.049554	over	B7Z4U6	B2R6A3, D3DUP2,B7Z4U6	0.0282025	0.980929
GO:0016774	phosphotransferase activity, carboxyl group as acceptor	F	1	3	58	6054	1.72414	0.049554	over	P07205	P00558, P54886,P07205	0.0282025	0.980929
GO:0004758	serine C-palmitoyltransferase activity	F	1	3	58	6054	1.72414	0.049554	over	Q8NFR3	O15270, O15269,Q8NFR3	0.0282025	0.980929
GO:0043295	glutathione binding	F	1	3	58	6054	1.72414	0.049554	over	A4UJ43	P48637, E9PHS0,A4UJ43	0.0282025	0.980929
GO:0016454	C-palmitoyltransferase activity	F	1	3	58	6054	1.72414	0.049554	over	Q8NFR3	O15270, O15269,Q8NFR3	0.0282025	0.980929
GO:0061462	protein localization to lysosome	P	1	3	58	6054	1.72414	0.049554	over	E9PJK1	R4GMU8, A8K594,E9PJK1	0.0282025	0.980929
GO:0042296	ISG15 ligase activity	F	1	3	58	6054	1.72414	0.049554	over	C9J2P0	R4GND1, Q96LR5,C9J2P0	0.0282025	0.980929
GO:0010637	negative regulation of mitochondrial fusion	P	1	3	58	6054	1.72414	0.049554	over	Q99536	Q96E52, B4DHJ7,Q99536	0.0282025	0.980929
GO:0010635	regulation of mitochondrial fusion	P	1	3	58	6054	1.72414	0.049554	over	Q99536	Q96E52, B4DHJ7,Q99536	0.0282025	0.980929
GO:0034511	U3 snoRNA binding	F	1	3	58	6054	1.72414	0.049554	over	A0A024RC76	O43818, P55769,A0A024RC76	0.0282025	0.980929
GO:0097186	amelogenesis	P	1	3	58	6054	1.72414	0.049554	over	Q59H46	Q13586, P23229,Q59H46	0.0282025	0.980929
GO:0030056	hemidesmosome	C	1	3	58	6054	1.72414	0.049554	over	Q59H46	E9PMV1, Q15149,Q59H46	0.0282025	0.980929
GO:0032844	regulation of homeostatic process	P	3	75	58	6054	5.17241	1.23885	over	A4UJ43, A0A0D9SG53, O15247	Q9H2U1, B2R983, Q53RS1, Q5SWX3, Q53EL3, Q8NEW0, B2RDW0, Q86TZ8, Q15648, A8K8B9, Q9UPJ8, Q12955, A0A024R2C4, P12931, A0A0S2A5C8, E9PKG1, A0A024R281, P07992, Q12846, Q6ZT73, P22694, Q07812, E5RGN0, Q12797, A0A087WWW9, D6R938, Q5U071, A0A0G2JH68, H3BT57, Q13131, B2R4U3, P62942, Q00688, P26885, D6RDN9, M0R1V8, B2RA70, Q9NYB0, Q02790, Q9Y6M5, Q00534, P63244, B3KW93, M0R116, Q15120, Q15118, B4DGM6, Q9Y…	0.0290957	0.980929
GO:0031334	positive regulation of protein complex assembly	P	3	75	58	6054	5.17241	1.23885	over	Q96DZ4, B7Z4U6, B4DU58	P55072, P62195, P62191, Q92747, B2R9B4, R4GNH3, B3KPC7, Q8WUW1, H7C0A3, B8ZZ67, Q9BR76, A0A087WYU1, Q92508, P12931, P60983, B3KN06, O15511, Q07812, Q9UNE7, A4D0Y1, P18085, P07737, B2R4D5, Q9NYF8, B2RA70, P61160, P61158, E7EUA1, B2RA26, C9J712, Q7L576, Q9Y6U3, P05412, P14735, P63244, H0Y551, P43686, A9QQ22, Q14651, P36404, O15144, O15143, P35998, Q7Z3N4, O14613, A0A0S2Z4I9, A0A0S2Z4I7, B9TX31, Q9P…	0.0290957	0.980929
GO:0030136	clathrin-coated vesicle	C	3	75	58	6054	5.17241	1.23885	over	B8ZZZ1, B2R8A2, B4DPP0	Q15836, Q53FV3, B7Z6M7, B3KPA1, Q99767, O94973, C9JU58, B4DM44, Q9H0U4, Q12965, A0A087WYU1, Q96RF0, H0YEY8, A0A024R2H0, B3KNH5, O95295, Q12846, P11142, A0JLQ4, Q3SYF1, A0A024R0X0, Q10567, P53680, P20336, J3QLN2, Q00610, Q15286, Q7Z677, H3BRR0, P50897, P62820, O43760, O43752, O43747, Q3LIF3, H0YNE9, P61006, A8K2T7, J3KQA0, A0A087WTM7, Q8TET0, P51153, A0A0G2JQM1, B4DFM1, H0UID5, D6RAX1, O60493, B4D…	0.0290957	0.980929
GO:0044425	membrane part	C	18	1318	58	6054	31.0345	21.7707	over	Q8NFR3, Q9UJC3, Q7Z443, P16422, P26447, Q99536, E9PJK1, B8ZZZ1, P15144, P37059, D6RA82, P07205, B2R8A2, Q59H46, B4DPP0, P08727, B3KUB6, B7ZL93	B7Z7F5, P98198, F8WCQ4, A0A087X0K9, P51970, P08758, P08754, P06576, Q32Q12, P49662, A0A024RAV5, Q15836, P98172, P55072, Q5TG80, D3DP46, Q13641, F8VV56, O75970, P04350, Q99808, Q96GX3, Q9BSJ8, Q86VS8, H7C1G1, Q01650, Q13606, Q86VR1, Q8NGK3, Q8WVM8, O75947, Q9UES0, Q53G71, P55011, K7EIY6, K7EIY4, D6RIZ4, O75911, B7Z6Y2, F5H4Q5, P27824, P21283, P21281, Q3ZCQ8, A0A024RAJ5, B3KPP8, Q9UEL4, Q92796, P62…	0.0292592	0.980929
GO:0014070	response to organic cyclic compound	P	4	134	58	6054	6.89655	2.21341	over	A4UJ43, B4DLV6, D6RA82, P08727	A0A024RAV5, A0A024RB49, Q92769, Q8WVA9, X5CF57, B2R9B4, K7EIJ0, Q96GD0, Q15797, Q13573, P26038, H7C0E2, Q86V21, Q53EU2, B4DYT5, Q06310, Q9UPY3, Q15648, Q8N995, Q8N8W2, P10809, A8K8B9, P35241, A0A087WYV5, E9PKY2, B7Z532, Q53QD5, P11234, P11233, A0A024R2C4, Q96EB6, P12931, A0A0S2A5C8, B4DL06, Q8N884, P04083, A0A024R1X8, B1AHA8, B7Z3V1, Q63ZY3, P22694, E5RGW4, D2CFK5, Q07812, O75569, Q12797, P19838,…	0.0299928	0.980929
GO:0033559	unsaturated fatty acid metabolic process	P	2	30	58	6054	3.44828	0.49554	over	B4DVJ1, G3V2R9	P14174, Q99735, Q96SQ9, P16152, B2R761, B2R659, K7ERP4, C9J8E1, P49137, P09960, Q6NSD4, O00767, E5RFH6, J3QKK8, Q15185, P33897, O60427, B4DEN6, H7C5A7, A0A024R8L7, O95864, A0A0A0MS99, A0A0C4DG51, Q502X7, Q9BTZ2, Q4VXZ8, B4E0R0, B4E0M5,B4DVJ1, G3V2R9	0.030233	0.980929
GO:1901879	regulation of protein depolymerization	P	2	30	58	6054	3.44828	0.49554	over	B7Z4U6, B4DU58	J3QR41, B1AK87, A0A087X020, Q96GD0, Q12929, B5BU83, F8WA11, F6RFD5, H3BTU7, P12814, G5EA42, P58546, F8VQE1, B7Z2N5, E7EV99, Q9Y6U3, O43707, P52907, H0YMA2, Q5HYL6, Q5T123, A8K0K2, P47755, A0A0S2Z3C0, Q9Y281, A0A0U1RQQ1, F8W7U3, P23528,B7Z4U6, B4DU58	0.030233	0.980929
GO:0048306	calcium-dependent protein binding	F	2	30	58	6054	3.44828	0.49554	over	P25815, D6RA82	F5H4Q5, R4GN98, F5H442, B2R907, Q99653, B5BU83, P04083, F5H1F6, Q4W4Y1, P31949, H7BXG7, P50995, P08133, O75340, B4DHD2, B4DTZ6, P01023, P15153, B4DT77, O75131, Q9NW64, P63000, P07355, P09525, A8K0G2, A0A0S2Z377, I3L161, Q9H553,P25815, D6RA82	0.030233	0.980929
GO:0046824	positive regulation of nucleocytoplasmic transport	P	2	30	58	6054	3.44828	0.49554	over	Q8IVQ8, D3DSV0	Q5TG38, Q53F35, B7Z629, A0A024R1X8, Q13263, O95071, O15379, B4DTZ6, Q5F2F8, Q59F45, F6U1T9, Q14678, H0YN26, A8K2T7, B3KVB3, Q7Z434, B4DDX2, P12270, F2ZC06, Q86YQ0, P50402, P49841, Q8IWX8, K7EL18, Q14247, A0A024R5S9, P21333, Q68D16,Q8IVQ8, D3DSV0	0.030233	0.980929
GO:0007154	cell communication	P	24	1910	58	6054	41.3793	31.5494	over	H0YGX7, A0A024RC76, A4UJ43, P16422, P26447, Q96B43, P43355, E9PJK1, B2RA03, P25815, A0A024RDE8, P15144, Q05DN2, B7Z4U6, Q9H8M2, D6RA82, O15247, B2R8A2, Q59H46, D3DSV0, B4DPP0, P08727, B3KUB6, C9J2P0	E9PNK6, E7ENI6, A0A087X0K9, P08758, P08754, P14174, P06576, Q32Q12, P49662, Q53SV6, A0A024RAV5, Q15836, P98172, J3QR41, P55072, Q5TG80, D3DP46, Q5JW54, F8VV56, P55060, F8VV52, Q8WVQ1, Q86VU2, Q9H2Y7, Q53T40, Q13627, O75970, Q96GX5, P04350, Q96GX3, F8W733, Q01664, Q13619, Q13617, Q9BSJ8, A0A024R595, O75962, P55036, E9PAK5, Q13608, Q13606, B2R9S6, F2Z2V0, Q03828, Q8NGK3, K4DI93, A0A024RB10, F2Z2U4,…	0.0304722	0.980929
GO:0006631	fatty acid metabolic process	P	4	135	58	6054	6.89655	2.22993	over	B4DVJ1, Q99536, B4DH89, G3V2R9	P14174, P55084, B3KPZ7, B3KPX1, Q53G79, P11498, P28288, Q6VRU3, Q8IUB6, O95470, Q99735, Q99714, Q96SQ9, P11310, P08559, P16152, A8MT40, Q96RQ3, B2R856, P49419, B2RDK6, Q6YN16, B2RDE0, V9GYZ0, Q08426, Q6P1M0, Q96EB6, H7BZH6, H3BUW8, E5RHW4, B2R761, B0QYW5, B3KN05, B7Z3U1, P11177, B4DWS6, E5RHA5, B4DJX1, B2R673, C9J8Q5, B2R659, B2R5T2, B3KM97, K7ERP4, C9J8E1, Q08257, P24752, P42126, B2RAQ8, Q6Y1H2,…	0.0306267	0.980929
GO:0005509	calcium ion binding	F	4	136	58	6054	6.89655	2.24645	over	P26447, P25815, B7Z4U6, D6RA82	P08758, Q8WVQ1, F2Z2V0, Q53G71, P13693, P27824, P62166, P42566, Q13586, E5RK82, E9PMG1, Q9BRK5, R4GN98, Q658U4, Q96FQ6, H0Y9V7, B2RDW0, Q99674, Q8NF37, Q99653, A0A024R2W4, B7ZB41, D7RF68, A0A087WYV5, A8K7Q1, Q99584, P04083, E9PKG6, Q9UBV8, O95202, B3KMV8, B3KMB2, B4DJQ5, P12814, A3KMG0, P31949, P37235, Q12797, H7BXZ6, P17655, Q96D15, P11021, B7Z2N5, H7BXI1, A4QPB0, F8W1R7, B2RAL3, P50995, Q96C19,…	0.0312669	0.980929
GO:0010817	regulation of hormone levels	P	3	78	58	6054	5.17241	1.2884	over	P15144, P37059, B4DH89	E7ENI6, D3DP46, O75911, Q15738, Q53EU2, B4DMF5, Q15648, A8K8B9, Q9H0U4, B7Z4S4, Q8NE86, E9PL01, B2R761, H7BYW5, Q12846, A8K787, Q06124, P22694, P10644, B2R659, B2R5T2, E5RGN0, B7Z2V7, Q9UNE7, P49189, A4QPB0, P61224, Q5U000, B3KY43, Q14849, B7Z1M0, C9J719, P62834, P62820, Q59FI5, F5GZG1, O43768, H0YB13, H0YNG3, D6RCD0, E9PGI0, Q5F2F8, B3KVN0, Q14643, Q2Z1P3, P36404, H0YMG7, Q8IZV5, H3BQ52, Q14573,…	0.0318838	0.980929
GO:0060337	type I interferon-mediated signaling pathway	P	2	31	58	6054	3.44828	0.512058	over	A0A024RC76, Q05DN2	A0A0A0N0M2, S6AP35, F6IR49, B3KN79, P07900, Q06124, H0YE41, E2GIM7, P18031, H0YCK3, U5YKD2, P08238, P09914, Q6LD48, O14879, Q6LCB0, A8K3N4, Q59EC0, Q7Z434, J3KPM9, Q9Y3Z3, P05161, F8VXY3, Q8TCE5, Q16543, F8VWK9, Q16344, Q53TD0, A0A024DAK3,A0A024RC76, Q05DN2	0.0320176	0.980929
GO:0007204	elevation of cytosolic calcium ion concentration	P	2	31	58	6054	3.44828	0.512058	over	A4UJ43, O15247	Q86VR1, B2R983, B2RDW0, A8K8B9, Q9UPJ8, Q12955, P22694, P51572, Q12797, D6R938, Q5U071, A0A0G2JH68, P62942, B3KW93, M0R116, Q15118, Q9Y696, Q14643, Q6GPG7, Q14573, E9PES6, Q9Y3D6, P09429, A0A0U1RRH1, Q8IWX8, P19174, H3BLV0, H3BM67, C9J0K6,A4UJ43, O15247	0.0320176	0.980929
GO:0005793	endoplasmic reticulum-Golgi intermediate compartment	C	2	31	58	6054	3.44828	0.512058	over	P15144, B2R8A2	K7EIN4, Q49AG2, Q9BS26, Q9UQS6, Q5T8U5, Q92538, A8K7Q1, E9PKG6, B2R774, B4DWN1, B3KM47, Q7Z7H5, B7ZLE5, A8K5S3, P11021, I1VE18, O75396, P33908, Q14789, A8K3N4, Q15084, A6NLH6, E9PS17, P24390, Q9Y3B3, P07237, B4DP27, P49755, B4E0N6,P15144, B2R8A2	0.0320176	0.980929
GO:0072001	renal system development	P	2	32	58	6054	3.44828	0.528576	over	Q7Z443, Q59H46	Q15797, Q53EU2, A0A087WYV5, Q12965, P23229, B4DY33, A0A024R2C4, B4DL06, A0A024R1X8, A4D1Z4, O76024, Q562R1, Q07812, Q562M3, O43930, A9LSU1, Q9BYX7, H0YNM5, Q3KNR5, A8K3K1, D3DUP2, Q59F45, J3KPM9, Q9UIU6, B1AMG5, K7EL18, Q13707, B4E0H8, Q9NS00, Q8WVW5,Q7Z443, Q59H46	0.0338345	0.980929
GO:0071357	cellular response to type I interferon	P	2	32	58	6054	3.44828	0.528576	over	A0A024RC76, Q05DN2	A0A0A0N0M2, S6AP35, F6IR49, Q13325, B3KN79, P07900, Q06124, H0YE41, E2GIM7, P18031, H0YCK3, U5YKD2, P08238, P09914, Q6LD48, O14879, Q6LCB0, A8K3N4, Q59EC0, Q7Z434, J3KPM9, Q9Y3Z3, P05161, F8VXY3, Q8TCE5, Q16543, F8VWK9, Q16344, Q53TD0, A0A024DAK3,A0A024RC76, Q05DN2	0.0338345	0.980929
GO:0003081	regulation of systemic arterial blood pressure by renin-angiotensin	P	1	4	58	6054	1.72414	0.066072	over	P15144	B7Z4S4, Q5U000, B1AMG5,P15144	0.0372492	0.980929
GO:0003044	regulation of systemic arterial blood pressure mediated by a chemical signal	P	1	4	58	6054	1.72414	0.066072	over	P15144	B7Z4S4, Q5U000, B1AMG5,P15144	0.0372492	0.980929
GO:0060315	negative regulation of ryanodine-sensitive calcium-release channel activity	P	1	4	58	6054	1.72414	0.066072	over	O15247	B2R983, P62942, C9J0K6,O15247	0.0372492	0.980929
GO:0071803	positive regulation of podosome assembly	P	1	4	58	6054	1.72414	0.066072	over	B4DU58	Q14651, Q16658, B4DPW9,B4DU58	0.0372492	0.980929
GO:0001991	regulation of systemic arterial blood pressure by circulatory renin-angiotensin	P	1	4	58	6054	1.72414	0.066072	over	P15144	B7Z4S4, Q5U000, B1AMG5,P15144	0.0372492	0.980929
GO:0001990	regulation of systemic arterial blood pressure by hormone	P	1	4	58	6054	1.72414	0.066072	over	P15144	B7Z4S4, Q5U000, B1AMG5,P15144	0.0372492	0.980929
GO:0001656	metanephros development	P	1	4	58	6054	1.72414	0.066072	over	Q7Z443	Q3KNR5, J3KPM9, Q9UIU6,Q7Z443	0.0372492	0.980929
GO:0044794	positive regulation by host of viral process	P	1	4	58	6054	1.72414	0.066072	over	B4E200	P11498, O95292, A8KA83,B4E200	0.0372492	0.980929
GO:0044788	modulation by host of viral process	P	1	4	58	6054	1.72414	0.066072	over	B4E200	P11498, O95292, A8KA83,B4E200	0.0372492	0.980929
GO:0045110	intermediate filament bundle assembly	P	1	4	58	6054	1.72414	0.066072	over	P08727	A0A087WYY6, B8QGS9, B3KQI5,P08727	0.0372492	0.980929
GO:0050909	sensory perception of taste	P	1	4	58	6054	1.72414	0.066072	over	Q7Z443	P08754, P04899, P63096,Q7Z443	0.0372492	0.980929
GO:1901163	regulation of trophoblast cell migration	P	1	4	58	6054	1.72414	0.066072	over	H0YGX7	Q5H9A7, J3KRE2, Q07021,H0YGX7	0.0372492	0.980929
GO:0016895	exodeoxyribonuclease activity, producing 5'-phosphomonoesters	F	1	4	58	6054	1.72414	0.066072	over	A0A024RC76	P39748, Q9BQP7, Q5TZT0,A0A024RC76	0.0372492	0.980929
GO:0032020	ISG15-protein conjugation	P	1	4	58	6054	1.72414	0.066072	over	C9J2P0	R4GND1, Q96LR5, P05161,C9J2P0	0.0372492	0.980929
GO:0016775	phosphotransferase activity, nitrogenous group as acceptor	F	1	4	58	6054	1.72414	0.066072	over	C9JSQ1	Q9UKE5, P12277, E7ENQ1,C9JSQ1	0.0372492	0.980929
GO:0017059	serine C-palmitoyltransferase complex	C	1	4	58	6054	1.72414	0.066072	over	Q8NFR3	J3KTF9, O15270, O15269,Q8NFR3	0.0372492	0.980929
GO:0004529	exodeoxyribonuclease activity	F	1	4	58	6054	1.72414	0.066072	over	A0A024RC76	P39748, Q9BQP7, Q5TZT0,A0A024RC76	0.0372492	0.980929
GO:0009057	macromolecule catabolic process	P	1	581	58	6054	1.72414	9.59696	under	A0A024RC76	J3QR58, Q32Q12, J3QR41, P55072, Q09161, F8VV52, Q8WW12, P08708, Q13619, Q13617, J3QR09, B3KQ99, P55036, Q13608, K4DI93, F8W6N3, K7EIY6, P15880, F5H523, D6RIY6, Q8IUQ5, Q96H20, P62195, P62191, Q8WVC2, A8K9U6, A8K9U1, Q9H2J4, Q9NQT5, Q9NQT4, H7C189, B1AJY7, B4DMY4, A2IDA3, B4DZQ0, A0JP11, R4GNH3, B8ZZS4, A0A024R4C8, B4DZM3, B4DN40, P16278, Q5VTR2, R4GND1, Q53RX8, Q96T88, Q9BRP8, Q5T9A4, O95453, Q13…	0.0173727	0.980929
GO:0080134	regulation of response to stress	P	1	581	58	6054	1.72414	9.59696	under	C9J2P0	E9PNK6, P08758, P14174, P49662, A0A024RAV5, Q86VU2, A0A024RB49, Q13627, F8W733, P55036, B2R9R2, P25685, F5H4R1, P43034, P78527, P13693, P62195, P62191, B2R9L6, Q53FP0, B4DZZ0, Q9H2M9, Q92796, D6RIT0, A8K9U6, Q92769, P11441, Q53FI8, B1AJY7, A0A0A0N0M2, B4DMY4, H7C155, B2R9B4, P34932, P34931, A0JP11, R4GNH3, H7C134, R4GND1, B4DMR3, B4DZJ7, Q96ST3, Q13546, Q13535, B4DZF1, Q86UT6, B2R8U0, P10909, Q13…	0.0173727	0.980929
GO:0031211	endoplasmic reticulum palmitoyltransferase complex	C	1	4	58	6054	1.72414	0.066072	over	Q8NFR3	J3KTF9, O15270, O15269,Q8NFR3	0.0372492	0.980929
GO:0016486	peptide hormone processing	P	1	4	58	6054	1.72414	0.066072	over	P15144	B7Z4S4, Q5U000, B1AMG5,P15144	0.0372492	0.980929
GO:0016460	myosin II complex	C	1	4	58	6054	1.72414	0.066072	over	B7Z4U6	P14649, P19105, P35579,B7Z4U6	0.0372492	0.980929
GO:0035457	cellular response to interferon-alpha	P	1	4	58	6054	1.72414	0.066072	over	Q05DN2	Q53EU2, O14879, F8VXY3,Q05DN2	0.0372492	0.980929
GO:0010972	negative regulation of G2/M transition of mitotic cell cycle	P	1	4	58	6054	1.72414	0.066072	over	A0A0D9SG53	Q13564, Q13315, Q96K76,A0A0D9SG53	0.0372492	0.980929
GO:0042475	odontogenesis of dentin-containing tooth	P	1	4	58	6054	1.72414	0.066072	over	Q59H46	Q13586, P23229, K7EL91,Q59H46	0.0372492	0.980929
GO:0010862	positive regulation of pathway-restricted SMAD protein phosphorylation	P	1	4	58	6054	1.72414	0.066072	over	D3DSV0	B4DYI8, P67870, P33981,D3DSV0	0.0372492	0.980929
GO:0004111	creatine kinase activity	F	1	4	58	6054	1.72414	0.066072	over	C9JSQ1	Q9UKE5, P12277, E7ENQ1,C9JSQ1	0.0372492	0.980929
GO:0061450	trophoblast cell migration	P	1	4	58	6054	1.72414	0.066072	over	H0YGX7	Q5H9A7, J3KRE2, Q07021,H0YGX7	0.0372492	0.980929
GO:0004030	aldehyde dehydrogenase [NAD(P)+] activity	F	1	4	58	6054	1.72414	0.066072	over	B4DH89	B2R5T2, H0YMG7, B4DDF8,B4DH89	0.0372492	0.980929
GO:0051480	cytosolic calcium ion homeostasis	P	2	34	58	6054	3.44828	0.561612	over	A4UJ43, O15247	Q86VR1, B2R983, B2RDW0, A8K8B9, Q9UPJ8, Q12955, P22694, P51572, Q12797, D6R938, Q5U071, A0A0G2JH68, P62942, B3KW93, M0R116, Q15118, Q9Y696, Q14643, Q6GPG7, Q14573, Q14571, E9PES6, Q9Y3D6, P09429, A0A0U1RRH1, Q8IWX8, C9JKI3, P19174, H3BLV0, H3BM67, C9J0K6, A0A024RBC7,A4UJ43, O15247	0.03756	0.980929
GO:0030665	clathrin-coated vesicle membrane	C	2	34	58	6054	3.44828	0.561612	over	B8ZZZ1, B4DPP0	Q15836, O94973, H0YEY8, A0A024R2H0, B3KNH5, P11142, A0A024R0X0, Q10567, P53680, P20336, J3QLN2, Q00610, Q7Z677, O43747, Q3LIF3, A8K2T7, J3KQA0, A0A087WTM7, Q8TET0, A0A0G2JQM1, B4DFM1, H0UID5, D6RAX1, A0A024R7S3, P09496, P61966, O95782, O95716, Q9UH51, J3QRU4, P54652, A0A024R5L7,B8ZZZ1, B4DPP0	0.03756	0.980929
GO:0034340	response to type I interferon	P	2	34	58	6054	3.44828	0.561612	over	A0A024RC76, Q05DN2	A0A0A0N0M2, S6AP35, F6IR49, Q13325, B3KN79, P07900, Q06124, H0YE41, E2GIM7, Q5U071, P18031, H0YCK3, U5YKD2, P08238, P09914, Q6LD48, O14879, Q6LCB0, A8K3N4, Q59EC0, Q7Z434, J3KPM9, Q9Y3Z3, P05161, F8VXY3, Q8TCE5, Q16543, P09429, F8VWK9, Q16344, Q53TD0, A0A024DAK3,A0A024RC76, Q05DN2	0.03756	0.980929
GO:0048513	organ development	P	11	712	58	6054	18.9655	11.7608	over	Q7Z443, P26447, A0A024RDE8, B4DH89, A0A087X0Q6, Q96DZ4, D6RA82, A0A0D9SG53, O15247, Q59H46, P08727	A0A087X0K9, B1AKN7, Q32Q12, P49662, A0A024RAV5, P98172, P39880, Q5TG80, B4DNM0, Q9H2Y7, Q53T40, Q13627, Q13619, F5H4V9, Q03828, K4DI93, A0A024RB10, Q52LB7, P43034, O75911, P78527, Q6NXE6, P21281, B3KQ29, B2R9L6, Q9NQX4, Q96GM5, Q92796, P13645, A8K9U1, Q9UEH5, Q92769, B7Z722, P62136, P46939, B3KPJ4, A0A0A0N0M2, B4DMY4, X5CF57, F2Z2E2, H7C155, B2R9B4, B4DZQ5, P34931, A0A087X020, H7C0R2, Q15797, Q49…	0.0376145	0.980929
GO:0061061	muscle structure development	P	3	85	58	6054	5.17241	1.40403	over	A0A024RDE8, A0A0D9SG53, P08727	Q53T40, Q9NQX4, A8K9U0, Q92769, B7Z722, P46939, Q53EU2, Q8WUI4, R4GMT0, O94907, B7ZB56, B5BU61, B3KNJ3, A0A087WYK8, B5BU16, Q9BQ04, B4DL06, C9JFH1, P60953, B7Z481, P67936, P12814, Q562R1, E9PJF0, F8VQR7, B3KM81, Q562M3, P17655, B4DVY5, B7Z2N5, B8QGS9, Q8NC56, Q96C98, F8W1R7, B2RAL3, P42025, O15379, B4DHN0, H3BRS1, O75369, Q9ULH7, Q9BYX7, A0A0J9YWY6, O43707, C9JP00, Q5QD01, B4DTN0, A8K3K1, A2VCL5,…	0.0387993	0.980929
GO:0050794	regulation of cellular process	P	38	3409	58	6054	65.5172	56.3099	over	H0YGX7, P55795, Q9NUU6, A0A024RC76, A4UJ43, Q7Z443, B4E200, P16422, P26447, A0A087WXU6, Q96B43, P43355, Q99536, E9PJK1, B2RA03, P25815, A0A024RDE8, P15144, Q8IVQ8, H0Y6D8, B4DH89, A0A087X0Q6, Q05DN2, B7Z4U6, Q06787, Q9H8M2, D6RA82, A0A0D9SG53, P05787, O15247, B2R8A2, Q59H46, D3DSV0, B4DPP0, P08727, B3KUB6, C9J2P0, B4DU58	P98198, F8WCQ4, E9PNK6, H7C1M2, E7ENI6, A0A087X0K9, Q8WW59, Q15847, P08758, P08754, P14174, P06576, J3QR58, B1AKN7, Q32Q12, P49662, Q53SV6, A0A024RAV5, A0A024RAV4, P98179, P98175, Q15836, P98173, P98172, P39880, J3QR41, P55072, Q5TG80, D3DP46, Q5JW54, Q09161, B7Z7B0, F8VV56, P55060, F8VV52, Q8WVQ1, B2R9V7, B4DNM0, Q86VU2, Q9H2Y7, B7Z7A4, A0A024RB49, B3KPZ7, Q53T40, Q13627, O75976, Q96GX9, O75970,…	0.0392826	0.980929
GO:0051261	protein depolymerization	P	2	35	58	6054	3.44828	0.57813	over	B7Z4U6, B4DU58	J3QR41, B1AK87, A0A087X020, Q96GD0, Q12929, B5BU83, F8WA11, F6RFD5, H3BTU7, P12814, G5EA42, P58546, F8VQE1, B7Z2N5, E7EV99, Q7RTP6, A8K4G7, Q9Y6U3, A8K3S3, O43707, I3L4J1, P52907, H0YMA2, Q5HYL6, Q5T123, A8K0K2, P47755, A0A0S2Z3C0, Q9Y281, A0A0U1RQQ1, O00139, F8W7U3, P23528,B7Z4U6, B4DU58	0.0394658	0.980929
GO:0034765	regulation of ion transmembrane transport	P	3	86	58	6054	5.17241	1.42055	over	A4UJ43, A0A0D9SG53, O15247	Q5TG80, Q86VR1, P46939, B1AJY7, B9EK39, Q13586, Q13546, B2R983, B4DZF1, A6NFQ2, Q5SWX3, Q53EN2, Q92625, B8ZZ67, B2RDW0, Q86TY5, Q99653, A8K8B9, Q6NVH9, Q12955, B4DL06, A0A024R281, A0A024R258, H0Y8B3, Q6ZT73, P22694, B2R6A3, O15554, P12814, P31947, P31946, Q12797, A7E2D8, P58546, B7Z2N5, D6R938, B7ZKY2, B4DIN7, P27348, P62942, Q59GI3, O43865, D3DVR8, B3KX12, Q9Y6M5, Q04917, O43707, H0Y551, D3DUP2,…	0.0398313	0.980929
GO:0030036	actin cytoskeleton organization	P	5	220	58	6054	8.62069	3.63396	over	H0YGX7, B7Z4U6, P08727, B3KUB6, B4DU58	A0A024RAV5, B4DNA3, Q92796, B7Z722, Q92747, B1AK87, Q9H2D6, Q96GD0, B3KPC7, Q8WUW1, P26038, Q53S54, H7C0A3, R4GMT0, B4DYX7, Q96FJ2, E9PM35, Q9BR76, H0Y9V7, P61586, B2RE34, A0A087WZB5, B7ZB56, Q9UPJ8, P35241, Q8N8M9, P78310, A0A087WYV5, Q12929, P11234, P11233, B3KNJ3, P42345, P12931, F8WA11, C9J9T0, B4DXH2, P04075, F6RFD5, P60983, P60953, Q6R327, A8K6X5, B3KN06, P60903, V9GY67, H7BYN4, B7Z3K0, P67…	0.0404698	0.980929
GO:0043062	extracellular structure organization	P	3	87	58	6054	5.17241	1.43707	over	Q96DZ4, B7Z4U6, B4DU58	P55081, K7EIX4, B4DMY4, E9PMR4, F8WC54, Q54A51, Q32P28, Q9UQS6, Q8NG19, E7EMF1, Q53RS1, P10915, Q8N9Q8, R4GMX5, A5YM53, B4DYI8, Q5H9A7, B7Z553, P23229, Q92542, P11215, F8WA11, Q9UP45, B3KMT1, P07942, P12814, P27487, A3KMG0, B2R5M9, B7ZLE5, B4DVP5, H0YD13, B7ZKY2, Q8NBJ5, P62942, A9LSU1, P05556, Q59GF2, D6W632, Q59FI5, A8K491, P01034, P01023, O15230, A9QQ22, Q15149, Q59F45, Q14651, B4DGD0, P05362,…	0.0408736	0.980929
GO:0031981	nuclear lumen	C	12	2021	58	6054	20.6897	33.3829	under	P55795, A0A024RC76, P43355, B4DLV6, Q8IVQ8, H0Y6D8, A0A087X0Q6, Q06787, Q9H8M2, D3DSV0, C9J2P0, B4DU58	H7C1M2, Q15847, P08754, P14174, B4E014, J3QR58, B1AKN7, Q99848, A0A024RAV4, P98175, J3QR41, P55072, Q9NRG0, Q9NRF9, Q09161, B7Z7B0, P55060, B4DNM0, Q86VU2, Q9H2Y7, A0A024RB49, Q53T40, Q8WW12, Q13627, Q5QJE6, Q86W56, Q96GX5, F8W733, Q01664, Q13619, Q13617, A0A024R595, Q9BSJ2, C9JII4, J3QR09, Q86W42, Q9H2W6, P55036, Q01658, A0A024RAQ3, B3KPX1, E9PAK5, Q01650, A0A024R588, Q13601, Q03828, Q5TG38, K4D…	0.0128935	0.980929
GO:0030198	extracellular matrix organization	P	3	87	58	6054	5.17241	1.43707	over	Q96DZ4, B7Z4U6, B4DU58	P55081, K7EIX4, B4DMY4, E9PMR4, F8WC54, Q54A51, Q32P28, Q9UQS6, Q8NG19, E7EMF1, Q53RS1, P10915, Q8N9Q8, R4GMX5, A5YM53, B4DYI8, Q5H9A7, B7Z553, P23229, Q92542, P11215, F8WA11, Q9UP45, B3KMT1, P07942, P12814, P27487, A3KMG0, B2R5M9, B7ZLE5, B4DVP5, H0YD13, B7ZKY2, Q8NBJ5, P62942, A9LSU1, P05556, Q59GF2, D6W632, Q59FI5, A8K491, P01034, P01023, O15230, A9QQ22, Q15149, Q59F45, Q14651, B4DGD0, P05362,…	0.0408736	0.980929
GO:0007169	transmembrane receptor protein tyrosine kinase signaling pathway	P	0	364	58	6054	0	6.01255	under		A0A024RAV5, P98172, F8VV56, Q86VU2, O75962, P55036, B2R9S6, K7EIY6, P21283, P21281, P62195, P62191, Q9UEL4, Q92796, Q92769, P42566, B1AJY7, Q92747, A0A0A0N0M2, F2Z2E2, H7C155, A0JP11, R4GNH3, Q8WUW1, P08670, Q13541, Q53S54, O75886, Q53RS1, Q13501, Q5SWX3, A5YM53, R4GMU8, D6RHX8, O94973, R4GMR5, Q9UQD4, B4DYX7, Q53EL3, B7Z629, B4DYU4, B2R8E4, Q06323, B2RDW0, P61586, P08581, E9PLL0, F1JVV5, B4DLP6,…	0.0269411	0.980929
GO:0009894	regulation of catabolic process	P	0	365	58	6054	0	6.02907	under		A0A024RAV5, P55072, A0A024R595, O75962, E9PAK5, B2R9S6, P25685, K7EIX0, Q96H20, P62195, P62191, Q9H2M9, A8K9U6, Q9H2J4, B7Z722, Q9NR50, E9PN68, B1AJY7, F2Z2E2, R4GNH3, Q96T88, Q15751, P26038, B4DZJ7, Q8NFQ8, B4DZF6, O95433, B4DZF1, P10909, B7ZC83, Q13501, R4GN94, A2RRP1, B7Z5Y3, R4GMU8, D6RHW1, Q53EN2, Q9NQ88, B4DYX7, A0A087WZP7, Q86UE8, Q86UE4, A0A024R3H2, Q6UWE0, B8ZZ67, E9PM35, B7Z5J7, Q8WTW4,…	0.0266665	0.980929
GO:0009117	nucleotide metabolic process	P	0	366	58	6054	0	6.04559	under		P08754, P06576, Q32Q12, A0A024RAV5, B2R9X3, P55072, Q9NRF8, Q13630, E9PNF5, A0A024R595, O75962, A0A024RAQ3, E9PAK5, B2R9S6, O75947, P25685, V9HW35, Q9H2M9, Q92796, B7Z722, Q9NR50, Q16222, E9PN68, K7EIN2, A2IDA3, F2Z2E2, P34931, P30566, E9PN17, B4DN40, P30520, Q99766, Q96T88, Q15751, P26038, Q8NFQ8, P51841, O95433, A8K9A5, Q96G61, P0DMV8, Q658U3, B7Z5Y3, R4GMU8, P23368, Q9NQ88, B4DYX7, A0A087WZP7,…	0.0263946	0.980929
GO:0071495	cellular response to endogenous stimulus	P	0	367	58	6054	0	6.06211	under		A0A024RAV5, P55036, P78527, P21283, P21281, P62195, P62191, B2R9L6, P62140, Q92769, P62136, A0A0A0N0M2, B4DMY4, F2Z2E2, H7C155, A0JP11, K7EIJ0, Q96GD0, R4GNH3, Q15797, F8WC54, Q13573, P26038, Q13541, Q53S54, Q53RS1, Q53EU2, Q9UE24, R4GMU8, Q8WUH2, D6RHX8, R4GMR5, Q9NQ88, Q53EL3, B7Z629, B4DYU4, Q96SB3, B2R8E4, B4DYT5, Q06323, Q06310, E9PM35, Q9BR76, B2RDW0, P61586, A0A087WZG9, Q15648, B4DLP6, Q8N…	0.0261255	0.980929
GO:0006753	nucleoside phosphate metabolic process	P	0	374	58	6054	0	6.17773	under		P08754, P06576, Q32Q12, A0A024RAV5, B2R9X3, P55072, Q9NRF8, Q13630, E9PNF5, A0A024R595, O75962, A0A024RAQ3, E9PAK5, B2R9S6, O75947, P25685, V9HW35, Q9H2M9, Q92796, B7Z722, Q9NR50, Q16222, E9PN68, K7EIN2, A2IDA3, F2Z2E2, P34931, P30566, E9PN17, B4DN40, P30520, Q99766, Q96T88, Q15751, P26038, Q8NFQ8, P51841, O95433, A8K9A5, Q96G61, P0DMV8, Q658U3, B7Z5Y3, R4GMU8, P23368, Q9NQ88, B4DYX7, A0A087WZP7,…	0.0243155	0.980929
GO:1901265	nucleoside phosphate binding	F	4	998	58	6054	6.89655	16.485	under	P55795, Q2TU64, P07205, D3DSV0	P98198, P08754, P06576, J3QR58, Q32Q12, A0A024RAV5, P98179, P98175, B2R9X3, J3QR41, P55072, Q5TG80, Q86VU2, Q13627, Q96GX5, P04350, Q96GX3, Q96GW9, O75962, A0A024R4X0, B3KQ99, B3KPX5, A0A024RAQ3, Q13608, Q86VR6, A0A024RB10, V9HW89, Q9H2U1, F5H4R1, O75911, P78527, P21281, P62195, P62191, B2R9L6, Q53FP0, P11498, F8W6I7, B2R9K8, P54577, Q5SY16, Q9NQX4, Q3ZCM7, P13639, A8K9U0, K7EIN2, Q8IUH3, A0A024R…	0.018377	0.980929
GO:0000166	nucleotide binding	F	4	998	58	6054	6.89655	16.485	under	P55795, Q2TU64, P07205, D3DSV0	P98198, P08754, P06576, J3QR58, Q32Q12, A0A024RAV5, P98179, P98175, B2R9X3, J3QR41, P55072, Q5TG80, Q86VU2, Q13627, Q96GX5, P04350, Q96GX3, Q96GW9, O75962, A0A024R4X0, B3KQ99, B3KPX5, A0A024RAQ3, Q13608, Q86VR6, A0A024RB10, V9HW89, Q9H2U1, F5H4R1, O75911, P78527, P21281, P62195, P62191, B2R9L6, Q53FP0, P11498, F8W6I7, B2R9K8, P54577, Q5SY16, Q9NQX4, Q3ZCM7, P13639, A8K9U0, K7EIN2, Q8IUH3, A0A024R…	0.018377	0.980929
GO:1901575	organic substance catabolic process	P	4	1021	58	6054	6.89655	16.8649	under	A0A024RC76, P15144, B4DH89, P07205	J3QR58, Q32Q12, P55084, A0A024RAV5, J3QR41, P55072, Q09161, F8VV52, Q8WW12, P08708, Q13619, Q13617, A0A024R595, J3QR09, O75962, B3KQ99, P55036, B3KPX1, E9PAK5, Q13608, B2R9S6, K4DI93, V9HW89, P25685, F8W6N3, K7EIY6, P15880, F5H523, D6RIY6, L0R849, Q8IUQ5, Q96H20, B7Z6W5, P62195, P62191, Q8IV08, Q9H2M9, Q5SY01, Q9NQW7, Q8WVC2, A8K9U6, A8K9U1, P62140, Q9H2J4, B7Z722, P62136, Q9NQT5, Q9NQT4, Q9NR50,…	0.0157189	0.980929
GO:0030054	cell junction	C	8	461	58	6054	13.7931	7.6148	over	P16422, E9PJK1, B7Z4U6, A0A0D9SG53, O15247, Q59H46, B4DPP0, B3KUB6	A0A087X0K9, P08758, Q86W92, B1AKN7, Q32Q12, A0A024RAV5, Q53T40, O75970, Q96GX3, P08708, J3QR09, Q9H2W6, F2Z2V0, A0A024RAP0, Q53FV3, Q53G71, O75934, P15880, P62191, Q9H307, Q9UEL4, B4DNA3, Q92796, P62140, B7Z722, P62136, P46939, E9PMV1, A0A0A0N0M2, F2Z2E2, E9PMR4, Q9NR12, P34931, Q9H2D6, B3KPC7, Q49AE1, F8WC54, Q54A51, B4DZM3, P08670, P26038, E7EMF1, Q53RS1, P57105, B2R932, R4GMX5, P0DMV8, P23396,…	0.0410202	0.980929
GO:0006096	glycolysis	P	2	36	58	6054	3.44828	0.594648	over	B4DH89, P07205	L0R849, Q9NQ88, P08559, P49419, Q12915, P06213, B3KMT5, P11177, K7ESE6, B4DJX1, C9J8Q5, B2R5T2, P30038, O75376, O15294, B7ZW15, Q15124, H0YMG7, B4DFP1, B4DFL1, H0UIA1, P00338, C9JMC5, P07311, B4DE36, B4DDQ8, B4DDF8, P30837, P07195, Q9BTZ2, Q02252, P18669, J3QRD1, P54619,B4DH89, P07205	0.0413985	0.980929
GO:0048525	negative regulation of viral process	P	2	36	58	6054	3.44828	0.594648	over	A0A024RC76, B7Z4U6	Q01664, A8K9U6, Q92769, A0A0A0N0L3, H7C134, A8K8B2, P78362, B5BU61, O95292, B3KN79, Q12899, B7ZLZ1, Q3SYF1, Q13263, A0A024R143, H3BT57, P09914, Q13049, D3DUZ3, P05412, H0Y551, Q7Z434, O60493, C9JZB0, H7C5E8, P05161, F8VXY3, Q9Y3E7, M4VP52, P09429, F8VWK9, Q8IW76, Q53TD0, C9J0H3,A0A024RC76, B7Z4U6	0.0413985	0.980929
GO:0003727	single-stranded RNA binding	F	2	36	58	6054	3.44828	0.594648	over	P55795, D3DSV0	F8W6I7, B2R8Z8, Q86UW0, B2R7W4, Q13325, H0Y8G5, Q92499, D6R9P3, P22626, P31943, Q12771, H7BY49, P38919, E9PIN3, G3V4C1, B7Z1D3, Q5TA58, Q2TSD2, A0A087WUK2, I3L521, A0A087WTT1, A4FVC0, D6RBP6, A6NLN1, A0A0D9SFB3, B4E3E6, B3KU28, Q8IYB7, B1ANR0, Q8TCS8, B4DDX2, B2WTI3, P52597, P09234,P55795, D3DSV0	0.0413985	0.980929
GO:0048523	negative regulation of cellular process	P	19	1493	58	6054	32.7586	24.6614	over	H0YGX7, A0A024RC76, A4UJ43, P16422, A0A087WXU6, P43355, Q99536, B2RA03, A0A024RDE8, B4DH89, A0A087X0Q6, B7Z4U6, Q06787, Q9H8M2, D6RA82, A0A0D9SG53, P08727, C9J2P0, B4DU58	H7C1M2, A0A087X0K9, P08758, P08754, P14174, B1AKN7, Q32Q12, Q53SV6, A0A024RAV5, A0A024RAV4, P39880, J3QR41, F8VV52, B4DNM0, Q86VU2, Q9H2Y7, A0A024RB49, Q53T40, Q96GX9, O75970, Q01664, Q13619, Q13617, B2R9T9, A0A024R595, C9JII4, Q86W42, P55036, Q01658, B3KPX1, Q7KZ85, Q13608, A0A024R588, F2Z2V0, Q5TG38, K4DI93, A0A024RB10, F2Z2U4, Q53G71, F8W6N3, K7EIY6, Q52LB7, P43034, P78527, B7Z6Y2, L0R849, P13…	0.0423413	0.980929
GO:0045069	regulation of viral genome replication	P	2	37	58	6054	3.44828	0.611166	over	A0A024RC76, B4E200	A0A024RB49, A8K9U6, P11388, A8K8B2, P78362, Q12906, B2R6X6, B3KN79, B7ZLZ1, H0YCK3, C9JQD4, P09914, A8K486, D3DUZ3, Q59EC0, B2RXF3, Q7Z434, A0A0D9SFB3, E9PEQ6, C9JMM5, A8K1J3, C9JZB0, P05161, F8VXY3, M4VP52, Q16531, Q16513, E5KN59, Q9P035, F8VWK9, P49792, Q8IW76, A0A087X1A5, C9J0H3, A0A024DAK3,A0A024RC76, B4E200	0.0433569	0.980929
GO:0044428	nuclear part	C	14	2251	58	6054	24.1379	37.182	under	P55795, A0A024RC76, B4E200, P43355, B4DLV6, Q8IVQ8, H0Y6D8, A0A087X0Q6, Q06787, Q9H8M2, O15247, D3DSV0, C9J2P0, B4DU58	H7C1M2, Q15847, P08758, P08754, P14174, B4E014, J3QR58, B1AKN7, Q53SV6, Q99848, A0A024RAV4, P98179, P98175, J3QR41, P55072, Q9NRG0, Q9NRF9, Q09161, B7Z7B0, P55060, B4DNM0, Q86VU2, Q9H2Y7, A0A024RB49, Q53T40, Q8WW12, Q13627, Q5QJE6, Q86W56, Q96GX5, P04350, F8W733, Q01664, Q8WW01, Q13619, Q13617, A0A024R595, Q9BSJ2, C9JII4, J3QR09, Q86W42, Q9H2W6, P55036, Q01658, A0A024RAQ3, B3KPX1, E9PAK5, Q01650,…	0.012573	0.980929
GO:0042277	peptide binding	F	2	37	58	6054	3.44828	0.611166	over	A4UJ43, B4E200	F8W733, F5H4I5, Q99767, P52294, B7Z629, A0A024R3H2, S6AP35, F6IR49, A8K7D9, P06213, B2RBR9, B7Z2P6, U5YKD2, C9JQD4, P37108, P48637, E9PHS0, P01034, Q3LIE7, P14735, P61011, P02647, B4DFM1, H0UID5, Q5QNY5, P24390, C9JN15, B4DS19, C9JMM5, Q8IYQ9, J3KNN7, A0A024R7F7, E5KN59, Q9UHB9, Q92973,A4UJ43, B4E200	0.0433569	0.980929
GO:0016477	cell migration	P	6	304	58	6054	10.3448	5.02147	over	H0YGX7, P25815, Q96DZ4, D6RA82, Q59H46, P08727	A0A024RAV5, F8VV56, P04350, Q01650, Q53G71, P43034, E9PMY3, Q3ZCM7, Q9NQW6, B8ZZW5, A0A0A0N0M2, A0A087X020, H7C0R2, Q8WUY9, B3KPC7, Q49AE1, F8WC54, Q54A51, Q5VTR2, B4DMR3, P26038, B2R8X4, E7EMF1, Q53S54, Q53RS1, A6NFQ2, P57105, Q53EU2, R4GMX5, A5YM53, Q8WUI4, Q86UJ2, Q53EL3, B7Z629, E9PLV9, B4DYU4, Q96SB3, C9JU34, A0A024R3H2, E9PM35, B7Z5L6, H0YG38, Q9BR76, P61586, P08581, Q86TY5, B4DYI8, Q5H9A7,…	0.0442228	0.980929
GO:0034762	regulation of transmembrane transport	P	3	91	58	6054	5.17241	1.50314	over	A4UJ43, A0A0D9SG53, O15247	Q5TG80, Q86VR1, P46939, B1AJY7, B9EK39, Q13586, Q13546, B2R983, B4DZF1, A6NFQ2, Q5SWX3, Q53EN2, Q92625, B8ZZ67, B2RDW0, Q86TY5, Q99653, A8K8B9, Q6NVH9, Q12955, A0A024R2C4, B4DL06, B2R6X6, A0A024R281, A0A024R258, H0Y8B3, Q6ZT73, P22694, B2R6A3, O15554, P12814, P31947, P31946, Q12797, A7E2D8, P58546, B7Z2N5, D6R938, B7ZKY2, B4DIN7, P27348, P62942, Q59GI3, O43865, D3DVR8, B3KX12, Q9Y6M5, Q04917, O43…	0.045143	0.980929
GO:0033554	cellular response to stress	P	3	859	58	6054	5.17241	14.189	under	A4UJ43, Q9H8M2, C9J2P0	E9PNK6, P14174, J3QR58, P49662, A0A024RAV5, P55072, B2R9V7, Q86VU2, Q13627, Q86W56, F8W733, Q01664, Q13619, Q13617, P55036, Q13608, Q5TG38, K4DI93, A0A024RAP0, A0A024RB10, F2Z2U4, B2R9R2, Q53G71, P25685, K7EIY6, F5H4R1, P43034, P78527, P13693, V9HW35, B7Z6W5, P62195, P62191, B2R9L6, P13667, B4DZZ0, Q9H2M9, A8K9U0, Q92769, B7Z722, P62136, P11441, B3KPJ4, Q9BRZ2, B1AJY7, Q9H2G2, X5CF57, B8ZZU8, A2I…	0.0191833	0.980929
GO:0033764	steroid dehydrogenase activity, acting on the CH-OH group of donors, NAD or NADP as acceptor	F	1	6	58	6054	1.72414	0.099108	over	P37059	Q15738, Q99714, B2R659, P14550, P56937,P37059	0.0548258	0.980929
GO:0003073	regulation of systemic arterial blood pressure	P	1	6	58	6054	1.72414	0.099108	over	P15144	B4DYI8, B7Z4S4, Q5U000, Q01970, B1AMG5,P15144	0.0548258	0.980929
GO:0033632	regulation of cell-cell adhesion mediated by integrin	P	1	6	58	6054	1.72414	0.099108	over	P16422	Q92508, P27487, Q96N83, A2VCL5, H7C598,P16422	0.0548258	0.980929
GO:0002283	neutrophil activation involved in immune response	P	1	6	58	6054	1.72414	0.099108	over	D6RA82	Q15836, P51809, B4DY46, O00186, J3QRU4,D6RA82	0.0548258	0.980929
GO:0019062	viral attachment to host cell	P	1	6	58	6054	1.72414	0.099108	over	E9PJK1	B2R907, P07900, P08238, P05362, K7EKE8,E9PJK1	0.0548258	0.980929
GO:0072091	regulation of stem cell proliferation	P	1	6	58	6054	1.72414	0.099108	over	P16422	F5H4V9, Q96GM5, A0A024R3E4, Q5TA58, A4FVC0,P16422	0.0548258	0.980929
GO:0090543	Flemming body	C	1	6	58	6054	1.72414	0.099108	over	B4DU58	A8K5S3, P37198, A8K4G7, P62826, I3L4J1,B4DU58	0.0548258	0.980929
GO:0044650	adhesion of symbiont to host cell	P	1	6	58	6054	1.72414	0.099108	over	E9PJK1	B2R907, P07900, P08238, P05362, K7EKE8,E9PJK1	0.0548258	0.980929
GO:0000738	DNA catabolic process, exonucleolytic	P	1	6	58	6054	1.72414	0.099108	over	A0A024RC76	B4DZC3, Q13404, F8VR31, P61088, Q9H4L7,A0A024RC76	0.0548258	0.980929
GO:0050886	endocrine process	P	1	6	58	6054	1.72414	0.099108	over	P15144	B7Z4S4, Q5U000, Q2Z1P3, B3KRW2, B1AMG5,P15144	0.0548258	0.980929
GO:0050871	positive regulation of B cell activation	P	1	6	58	6054	1.72414	0.099108	over	E9PJK1	P14174, A0A024R2C4, B2RA26, K7ENH8, B7Z8Y1,E9PJK1	0.0548258	0.980929
GO:0031581	hemidesmosome assembly	P	1	6	58	6054	1.72414	0.099108	over	Q59H46	E9PMV1, E9PMR4, P23229, Q15149, A0A024R972,Q59H46	0.0548258	0.980929
GO:1901020	negative regulation of calcium ion transmembrane transporter activity	P	1	6	58	6054	1.72414	0.099108	over	O15247	B2R983, B4DZF1, A0A024R258, P62942, C9J0K6,O15247	0.0548258	0.980929
GO:0051014	actin filament severing	P	1	6	58	6054	1.72414	0.099108	over	B7Z4U6	F6RFD5, A0A087WW56, J3KS54, Q13045, Q9Y6U3,B7Z4U6	0.0548258	0.980929
GO:0043312	neutrophil degranulation	P	1	6	58	6054	1.72414	0.099108	over	D6RA82	Q15836, P51809, B4DY46, O00186, J3QRU4,D6RA82	0.0548258	0.980929
GO:0030890	positive regulation of B cell proliferation	P	1	6	58	6054	1.72414	0.099108	over	E9PJK1	P14174, A0A024R2C4, B2RA26, K7ENH8, B7Z8Y1,E9PJK1	0.0548258	0.980929
GO:0042573	retinoic acid metabolic process	P	1	6	58	6054	1.72414	0.099108	over	B4DH89	B2R5T2, H0YMG7, Q8IZV5, B4DDF8, P30837,B4DH89	0.0548258	0.980929
GO:0042476	odontogenesis	P	1	6	58	6054	1.72414	0.099108	over	Q59H46	Q13586, P23229, P07942, K7EL91, H7C231,Q59H46	0.0548258	0.980929
GO:0046827	positive regulation of protein export from nucleus	P	1	6	58	6054	1.72414	0.099108	over	Q8IVQ8	Q53F35, H0YN26, P50402, P49841, Q68D16,Q8IVQ8	0.0548258	0.980929
GO:0007162	negative regulation of cell adhesion	P	2	38	58	6054	3.44828	0.627684	over	H0YGX7, P16422	B4DMR3, P26038, Q9BR76, P35241, Q9H0R5, B3KN06, P12814, A7E2E5, B7Z2N5, Q5JRA6, B7ZKY2, Q59GF2, H0YBP1, O60711, Q8N4P8, J3KRE2, O43707, Q5T3J6, B4DTL8, Q14678, B4DGC3, E9PFQ4, Q9UJU1, P02647, E7ERI8, E3W994, E7EQR4, A0A0S2Z3C0, K7EM91, Q8TCE5, A0A0A0MRI0, E7EPF1, P09382, C9JJV6, A5PLK7, Q9NRW8,H0YGX7, P16422	0.0453397	0.980929
GO:0046483	heterocycle metabolic process	P	16	2444	58	6054	27.5862	40.37	under	P55795, A0A024RC76, P16422, A0A087WXU6, P43355, E9PJK1, B4DLV6, H0Y6D8, B4DH89, A0A087X0Q6, Q9H8M2, D6RA82, A0A0D9SG53, C9JSQ1, D3DSV0, C9J2P0	A0A024RB99, H7C1M2, Q15847, P08758, P08754, P06576, B4E014, J3QR58, B1AKN7, Q32Q12, P55084, A0A024RAV5, A0A024RAV4, P98179, P98175, P39880, B2R9X3, J3QR41, P55072, Q9NRG0, Q9NRF9, Q9NRF8, Q09161, F8VV52, Q13630, B4DNM0, Q86VU2, A0A024RB49, Q53T40, Q13627, E9PNF5, Q86W56, Q99808, F8W733, Q01664, Q8WW01, P08708, Q13619, Q13617, A0A024R595, C9JII4, J3QR09, Q86W42, Q96GW9, O75962, B3KQ99, B3KPX5, Q01…	0.0145527	0.980929
GO:0006725	cellular aromatic compound metabolic process	P	16	2432	58	6054	27.5862	40.1718	under	P55795, A0A024RC76, A4UJ43, P16422, A0A087WXU6, P43355, E9PJK1, B4DLV6, H0Y6D8, B4DH89, A0A087X0Q6, Q9H8M2, D6RA82, A0A0D9SG53, D3DSV0, C9J2P0	A0A024RB99, H7C1M2, Q15847, P08758, P08754, P14174, P06576, B4E014, J3QR58, B1AKN7, Q32Q12, P55084, A0A024RAV5, A0A024RAV4, P98179, P98175, P39880, B2R9X3, J3QR41, P55072, Q9NRG0, Q9NRF9, Q9NRF8, Q09161, F8VV52, Q13630, B4DNM0, Q86VU2, A0A024RB49, Q53T40, Q13627, E9PNF5, Q86W56, Q99808, F8W733, Q01664, Q8WW01, P08708, Q13619, Q13617, A0A024R595, C9JII4, J3QR09, Q86W42, Q96GW9, O75962, B3KQ99, B3K…	0.0154709	0.980929
GO:0044429	mitochondrial part	C	1	528	58	6054	1.72414	8.72151	under	C9JSQ1	A0A024RB99, F8WCQ4, P51970, P06576, Q32Q12, P55084, B3KPZ7, Q96GW9, Q9H2W6, A0A024R4X0, A0A024RAQ3, B3KPX1, Q53G79, O75947, Q9H2U2, P27824, Q3ZCQ8, V9HW35, Q53G19, P11498, Q9UEH5, Q96TC7, B8ZZV5, P28288, H7C155, X6RKS3, E9PN17, B8ZZS4, Q9BRT2, Q15785, E5RJZ1, B1AK13, Q99766, Q99757, D3DNS1, Q9UDW1, Q99714, Q86UT6, A8K9B2, A8K9A5, P82933, H7C0E2, P82932, P82930, Q96G61, P82914, P82912, A0A087WZY2,…	0.0274233	0.980929
GO:0031967	organelle envelope	C	1	533	58	6054	1.72414	8.8041	under	C9JSQ1	A0A024RB99, F8WCQ4, P51970, P06576, Q32Q12, P55084, A0A024RAV4, P04350, Q9H2W6, A0A024R4X0, A0A024RAQ3, Q53G79, O75947, P43034, H7C1A0, P27824, Q3ZCQ8, Q53G19, Q3ZCM7, Q9UEH5, Q96TC7, B8ZZV5, P28288, H7C155, X6RKS3, E9PN17, Q15797, Q9BRT2, Q49AE1, Q15785, B3KPA1, E5RJZ1, Q53RX8, Q99766, Q99735, A8MTU8, D3DNS1, P51841, P20700, Q9UDW1, Q86UT6, A8K9B2, A8K9A5, P82933, H7C0E2, P82932, P82930, R4GN98,…	0.0262839	0.980929
GO:0031975	envelope	C	1	534	58	6054	1.72414	8.82061	under	C9JSQ1	A0A024RB99, F8WCQ4, P51970, P06576, Q32Q12, P55084, A0A024RAV4, P04350, Q9H2W6, A0A024R4X0, A0A024RAQ3, Q53G79, O75947, P43034, H7C1A0, P27824, Q3ZCQ8, Q53G19, Q3ZCM7, Q9UEH5, Q96TC7, B8ZZV5, P28288, H7C155, X6RKS3, E9PN17, Q15797, Q9BRT2, Q49AE1, Q15785, B3KPA1, E5RJZ1, Q53RX8, Q99766, Q99735, A8MTU8, D3DNS1, P51841, P20700, Q9UDW1, Q86UT6, A8K9B2, A8K9A5, P82933, H7C0E2, P82932, P82930, R4GN98,…	0.0260613	0.980929
GO:1901135	carbohydrate derivative metabolic process	P	1	536	58	6054	1.72414	8.85365	under	Q8NFR3	P08754, P06576, Q32Q12, A0A024RAV5, B2R9X3, P55072, Q9NRF8, Q8WVQ1, Q13630, A0A024R595, O75962, A0A024R4X0, A0A024RAQ3, E9PAK5, B2R9S6, O75947, Q53G71, P25685, P27824, F8VUJ3, Q9H2M9, Q92796, B7Z722, H7C0X4, Q9NR50, Q16222, P46926, E9PN68, Q9NR45, A2IDA3, F2Z2E2, P34931, P83436, P30566, E9PN17, Q8NFW8, A8K9K4, P16278, Q9BS26, P30520, Q99766, Q96T88, Q15751, P26038, O95470, Q8NFQ8, B2R8W4, P51841,…	0.0256214	0.980929
GO:0005524	ATP binding	F	1	540	58	6054	1.72414	8.91972	under	Q2TU64	P98198, P06576, J3QR58, Q32Q12, J3QR41, P55072, Q86VU2, Q13627, Q96GX5, Q96GW9, O75962, B3KPX5, Q13608, Q86VR6, A0A024RB10, Q9H2U1, F5H4R1, P78527, P21281, P62195, P62191, B2R9L6, P11498, B2R9K8, P54577, Q5SY16, Q9NQX4, A0A024R4H4, A0A0A0N0M2, Q9H2G2, Q9NR30, P28288, H7C155, B4DZQ5, P34931, A0JP11, R4GNH3, Q9BRS2, B3KPA1, P49588, Q5T9A4, A0A024RA66, Q13546, P51841, F5H3Y4, B4DZC0, Q5SWX3, P17987,…	0.0247622	0.980929
GO:0032559	adenyl ribonucleotide binding	F	1	549	58	6054	1.72414	9.06838	under	Q2TU64	P98198, P06576, J3QR58, Q32Q12, J3QR41, P55072, Q86VU2, Q13627, Q96GX5, Q96GW9, O75962, B3KPX5, Q13608, Q86VR6, A0A024RB10, Q9H2U1, F5H4R1, P78527, P21281, P62195, P62191, B2R9L6, P11498, B2R9K8, P54577, Q5SY16, Q9NQX4, A0A024R4H4, A0A0A0N0M2, Q9H2G2, Q9NR30, P28288, H7C155, B4DZQ5, P34931, A0JP11, R4GNH3, Q9BRS2, B3KPA1, P49588, Q5T9A4, A0A024RA66, Q13546, P51841, F5H3Y4, B4DZC0, Q5SWX3, P17987,…	0.0229257	0.980929
GO:0033218	amide binding	F	2	42	58	6054	3.44828	0.693756	over	A4UJ43, B4E200	F8W733, A0A024RAQ3, P11498, F5H4I5, Q99767, P52294, B7Z629, A0A024R3H2, S6AP35, F6IR49, B2RDE0, A8K7D9, P06213, B2RBR9, B7Z2P6, U5YKD2, C9JQD4, P37108, P48637, E9PHS0, P01034, Q3LIE7, P14735, P61011, J3KPX7, P02647, B4DFM1, H0UID5, Q5QNY5, P24390, C9JN15, B4DS19, C9JMM5, Q8IYQ9, J3KNN7, A0A024R7F7, E5KN59, Q9UHB9, Q92973, A0A0U1RQF0,A4UJ43, B4E200	0.0534904	0.980929
GO:0044450	microtubule organizing center part	C	2	42	58	6054	3.44828	0.693756	over	B2RA03, B4DU58	Q86VS8, Q9BSJ2, Q14008, P34931, E5RK82, P0DMV8, P11388, B9EIS5, B4DYM7, Q5SW79, P23258, Q05CT8, F8WA11, Q9UBK9, H7BZ50, P11142, H3BTU7, A0A087WWB5, S4R411, D3DVR8, P62826, Q9BYV8, Q9Y6A4, A0A024QYV8, A2VCL5, A8K2T9, A4UCT0, H7C5N4, A0A0G2JPW5, O15078, P41208, A0A0A0MSB8, Q5T0C7, P17066, B3KSM6, B4DQ79, B1AMJ5, O95613, Q6P582, P54652,B2RA03, B4DU58	0.0534904	0.980929
GO:0030554	adenyl nucleotide binding	F	1	554	58	6054	1.72414	9.15097	under	Q2TU64	P98198, P06576, J3QR58, Q32Q12, J3QR41, P55072, Q86VU2, Q13627, Q96GX5, Q96GW9, O75962, B3KPX5, Q13608, Q86VR6, A0A024RB10, Q9H2U1, F5H4R1, P78527, P21281, P62195, P62191, B2R9L6, P11498, B2R9K8, P54577, Q5SY16, Q9NQX4, A0A024R4H4, A0A0A0N0M2, Q9H2G2, Q9NR30, P28288, H7C155, B4DZQ5, P34931, A0JP11, R4GNH3, Q9BRS2, B3KPA1, P49588, Q5T9A4, A0A024RA66, Q13546, P51841, F5H3Y4, B4DZC0, Q5SWX3, P17987,…	0.0219609	0.980929
GO:0001655	urogenital system development	P	2	38	58	6054	3.44828	0.627684	over	Q7Z443, Q59H46	Q15797, Q53EU2, Q4KR72, A0A087WYV5, Q12965, P23229, B4DY33, A0A024R2C4, B4DL06, A0A024R1X8, A4D1Z4, O76024, Q562R1, Q07812, Q562M3, O43930, B4DVP5, A9LSU1, Q9BYX7, P07602, H0YNM5, Q3KNR5, A8K3K1, D3DUP2, Q59F45, J3KPM9, Q04721, D3DSX2, Q9UIU6, B4DRK1, B1AMG5, K7EL18, Q13707, B4E0H8, Q9NS00, Q8WVW5,Q7Z443, Q59H46	0.0453397	0.980929
GO:0032386	regulation of intracellular transport	P	4	157	58	6054	6.89655	2.59333	over	A4UJ43, Q8IVQ8, O15247, D3DSV0	Q96GX3, Q5TG38, Q8WVM8, A8K9U0, B1AJY7, P26038, B2R983, A6NFQ2, H7C0E2, Q96G61, Q53F35, B3KP18, Q53EL3, B7Z629, Q96FJ2, B2R8E4, A0A024R3H2, B2RDW0, P61586, B9EIS5, Q99653, A8K8B9, Q9UPJ8, P35241, Q12955, A0A024R2C4, Q96EB6, P12931, Q9BQ04, B2R761, A0A024R1X8, P60953, H7BZ93, B3KN05, A8K787, P22694, A7E2Y5, B2R6A3, Q99497, Q9GZY8, Q3SYF1, B7Z3E5, Q13263, P12814, Q07812, E9PJF0, P31947, P31946, Q8N…	0.0460669	0.980929
GO:0002178	palmitoyltransferase complex	C	1	5	58	6054	1.72414	0.08259	over	Q8NFR3	J3KTF9, Q7Z5G4, O15270, O15269,Q8NFR3	0.0461228	0.980929
GO:0002102	podosome	C	1	5	58	6054	1.72414	0.08259	over	B7Z4U6	O60711, Q14651, Q16658, B4DPW9,B7Z4U6	0.0461228	0.980929
GO:2000241	regulation of reproductive process	P	1	5	58	6054	1.72414	0.08259	over	H0YGX7	Q5H9A7, J3KRE2, A0A0D9SF51, Q07021,H0YGX7	0.0461228	0.980929
GO:0019079	viral genome replication	P	2	43	58	6054	3.44828	0.710274	over	A0A024RC76, B4E200	P55072, A0A024RB49, A8K9U6, R4GMU8, P11388, A8K8B2, P78362, P56545, Q12906, B2R6X6, B3KN79, B7ZLZ1, H0YCK3, C9JQD4, P09914, A8K486, D3DUZ3, Q59EC0, B2RXF3, Q7Z434, D6RAX2, A0A0D9SFB3, E9PEQ6, C9JMM5, A8K1J3, C9JZB0, P05161, F8VXY3, A0A0S2Z3I6, M4VP52, Q16531, Q16513, E5KN59, P35659, Q9P035, F8VWK9, P49792, Q8IW76, A0A087X1A5, C9J0H3, A0A024DAK3,A0A024RC76, B4E200	0.0555772	0.980929
GO:0006525	arginine metabolic process	P	2	43	58	6054	3.44828	0.710274	over	B4DH89, C9JSQ1	P13674, B4DMF5, Q5VSQ6, P04181, P49419, E7D7X9, Q05DA4, H0Y7N1, C9J8Q5, B2R5T2, A7E2D8, P07814, P54136, P49189, Q96C36, A8KAP9, P30038, P19623, B4DGY8, A8K3A8, Q9UKE5, B3KUZ8, H0YMG7, B4E3V1, B4DEP8, Q6XYD2, P17174, P52788, Q5T160, Q14400, P12277, P31327, B4DDF8, Q14353, P07237, P30837, Q02252, Q53H96, Q6P587, E7ENQ1, Q53SY7,B4DH89, C9JSQ1	0.0555772	0.980929
GO:0043244	regulation of protein complex disassembly	P	2	43	58	6054	3.44828	0.710274	over	B7Z4U6, B4DU58	J3QR41, B1AK87, B4DMX1, A0A087X020, Q96GD0, Q12929, B5BU83, F8WA11, F6RFD5, H3BTU7, P12814, G5EA42, P58546, F8VQE1, B7Z2N5, E7EV99, C9J7B5, J3KS15, B4DHJ7, Q9Y6U3, O43707, H3BR35, A8K2W7, P52907, H0YMA2, Q5HYL6, A0A0A0MTR2, I3L397, P52758, Q5T123, A0A024R8E8, Q8IYD1, A8K0K2, P47755, A0A0S2Z3C0, P62495, A0A024R7L5, Q9Y281, A0A0U1RQQ1, F8W7U3, P23528,B7Z4U6, B4DU58	0.0555772	0.980929
GO:0016485	protein processing	P	2	43	58	6054	3.44828	0.710274	over	Q96B43, P15144	D3DP46, F5H4Q5, Q99797, B4DMR3, Q9NQH7, O75844, F5H442, P35232, B7Z553, B7Z4S4, Q10713, Q92542, E9PL01, H3BUW8, Q96E52, E9PKA7, P15529, F5H1F6, P22695, B4DJQ8, Q3SYF1, P31930, Q5U000, Q6PUJ7, P62979, P01023, H0YNG3, Q2T9J0, B3KW95, J3KPX7, E7ES96, O60493, H7C585, E9PQR7, A8K072, B1AMG5, H3BLV0, P25774, Q07021, E9PNW4, Q45KI0,Q96B43, P15144	0.0555772	0.980929
GO:0051235	maintenance of location	P	3	97	58	6054	5.17241	1.60225	over	A4UJ43, B7Z4U6, O15247	J3QR41, Q53G71, Q7LGH1, B4DZU5, B1AJY7, B2R983, A0A024R3H2, Q9BR60, Q8NEW0, B2RDW0, B9EIS5, B2RE34, A8K8B9, A0A024R2W4, Q9UPJ8, B7Z4Z4, Q12955, A0A0K0L4Y0, Q96EE3, F8WA11, P60953, Q6ZT73, P22694, P31946, Q12797, P11021, G3V533, D6R938, O60826, H0Y742, P30101, A0A0G2JH68, H3BT57, P27348, P62942, Q59GI3, A8K4P6, Q9BZF1, O75369, B4DHJ4, C9JPA8, Q9Y6U3, Q9Y6M5, A0A087WV25, Q04917, B4DTN0, B3KW93, Q9H…	0.0518235	0.980929
GO:0002446	neutrophil mediated immunity	P	1	7	58	6054	1.72414	0.115626	over	D6RA82	Q15836, Q53RS1, P51809, B4DY46, O00186, J3QRU4,D6RA82	0.0633606	0.980929
GO:2001258	negative regulation of cation channel activity	P	1	7	58	6054	1.72414	0.115626	over	O15247	B2R983, B4DZF1, B8ZZ67, A0A024R258, P62942, C9J0K6,O15247	0.0633606	0.980929
GO:0001707	mesoderm formation	P	1	7	58	6054	1.72414	0.115626	over	Q59H46	E7EMF1, O94907, P05556, Q5T3J6, P17301, B4E0H8,Q59H46	0.0633606	0.980929
GO:0051825	adhesion to other organism involved in symbiotic interaction	P	1	7	58	6054	1.72414	0.115626	over	E9PJK1	B2R907, P07900, P08238, B7ZKQ9, P05362, K7EKE8,E9PJK1	0.0633606	0.980929
GO:0032461	positive regulation of protein oligomerization	P	1	7	58	6054	1.72414	0.115626	over	Q96DZ4	A0A087WYU1, Q07812, P14735, P63244, Q9Y371, B2ZP79,Q96DZ4	0.0633606	0.980929
GO:0044406	adhesion to host	P	1	7	58	6054	1.72414	0.115626	over	E9PJK1	B2R907, P07900, P08238, B7ZKQ9, P05362, K7EKE8,E9PJK1	0.0633606	0.980929
GO:0048333	mesodermal cell differentiation	P	1	7	58	6054	1.72414	0.115626	over	Q59H46	E7EMF1, O94907, P05556, Q5T3J6, P17301, B4E0H8,Q59H46	0.0633606	0.980929
GO:0048332	mesoderm morphogenesis	P	1	7	58	6054	1.72414	0.115626	over	Q59H46	E7EMF1, O94907, P05556, Q5T3J6, P17301, B4E0H8,Q59H46	0.0633606	0.980929
GO:0004602	glutathione peroxidase activity	F	1	7	58	6054	1.72414	0.115626	over	O15247	K7ERP4, Q6NSD4, Q59FU9, Q9Y2Q3, F5H7F6, B4DPY0,O15247	0.0633606	0.980929
GO:0055102	lipase inhibitor activity	F	1	7	58	6054	1.72414	0.115626	over	D6RA82	P08758, P04083, Q96CS3, P02656, P07355, P09525,D6RA82	0.0633606	0.980929
GO:0042633	hair cycle	P	1	7	58	6054	1.72414	0.115626	over	P08727	P13645, H0YAF9, A0A0S2Z3S5, P62304, C9JK03, Q6KC79,P08727	0.0633606	0.980929
GO:0042581	specific granule	C	1	7	58	6054	1.72414	0.115626	over	D6RA82	Q15836, B4DY46, Q12846, P50995, H3BNE1, O00186,D6RA82	0.0633606	0.980929
GO:0042574	retinal metabolic process	P	1	7	58	6054	1.72414	0.115626	over	B4DH89	B2R5T2, H0YMG7, Q8IZV5, B3KT84, B4DDF8, Q8TC12,B4DH89	0.0633606	0.980929
GO:0097435	fibril organization	P	1	7	58	6054	1.72414	0.115626	over	B7Z4U6	Q13546, B3KMT1, P07900, P08238, P62942, P01034,B7Z4U6	0.0633606	0.980929
GO:0042303	molting cycle	P	1	7	58	6054	1.72414	0.115626	over	P08727	P13645, H0YAF9, A0A0S2Z3S5, P62304, C9JK03, Q6KC79,P08727	0.0633606	0.980929
GO:0042119	neutrophil activation	P	1	7	58	6054	1.72414	0.115626	over	D6RA82	Q15836, P51809, B4DY46, B4DFV1, O00186, J3QRU4,D6RA82	0.0633606	0.980929
GO:0008207	C21-steroid hormone metabolic process	P	1	7	58	6054	1.72414	0.115626	over	P37059	Q15738, B2R761, C9J719, A0A0A0MTN9, P10109, E7EQL1,P37059	0.0633606	0.980929
GO:0034451	centriolar satellite	C	1	7	58	6054	1.72414	0.115626	over	B2RA03	B9EIS5, A2VCL5, A4UCT0, O15078, A0A0A0MSB8, O95613,B2RA03	0.0633606	0.980929
GO:0043901	negative regulation of multi-organism process	P	2	44	58	6054	3.44828	0.726792	over	A0A024RC76, B7Z4U6	A0A024RB49, Q01664, A8K9U6, Q92769, A0A0A0N0L3, H7C134, A5YM53, B2R8E4, A8K8B2, P78362, B4DLC0, B5BU61, O95292, B3KN79, Q12899, B7ZLZ1, Q3SYF1, Q13263, A0A024R143, Q15365, H3BT57, P09914, H3BRU6, Q13049, D3DUZ3, P05412, H0Y551, Q7Z434, O60493, C9JZB0, H7C5E8, P05161, F8VXY3, Q9Y3E7, M4VP52, P09429, F8VWK9, Q96J02, Q8IW76, Q53TD0, C9J0H3, C9JIR6,A0A024RC76, B7Z4U6	0.0576813	0.980929
GO:0005216	ion channel activity	F	2	44	58	6054	3.44828	0.726792	over	Q7Z443, O15247	Q5TG80, P62166, Q49AE1, A5YM53, A8K8R2, Q93034, B4DY51, Q92508, Q8NE86, P54289, B7Z3R2, B1AH94, O15554, B4DIX5, P62942, H0Y5Z6, P08133, B3KX12, Q9NY12, P45880, D6RCD9, Q9Y696, Q14643, Q9NWR8, Q9BXT2, B4DFZ1, P21796, E7ES96, Q14573, Q14571, Q9NW15, H7C5K2, B4E3N4, A8K1C7, B3KU09, A8K0K0, B6ETL5, A0A0S2Z377, O00299, A0A0U1RRH1, Q9Y277, Q9Y217,Q7Z443, O15247	0.0576813	0.980929
GO:0022838	substrate-specific channel activity	F	2	44	58	6054	3.44828	0.726792	over	Q7Z443, O15247	Q5TG80, P62166, Q49AE1, A5YM53, A8K8R2, Q93034, B4DY51, Q92508, Q8NE86, P54289, B7Z3R2, B1AH94, O15554, B4DIX5, P62942, H0Y5Z6, P08133, B3KX12, Q9NY12, P45880, D6RCD9, Q9Y696, Q14643, Q9NWR8, Q9BXT2, B4DFZ1, P21796, E7ES96, Q14573, Q14571, Q9NW15, H7C5K2, B4E3N4, A8K1C7, B3KU09, A8K0K0, B6ETL5, A0A0S2Z377, O00299, A0A0U1RRH1, Q9Y277, Q9Y217,Q7Z443, O15247	0.0576813	0.980929
GO:0018206	peptidyl-methionine modification	P	1	5	58	6054	1.72414	0.08259	over	Q96B43	P53582, P02647, B4E2G1, Q9HBH1,Q96B43	0.0461228	0.980929
GO:0051494	negative regulation of cytoskeleton organization	P	2	45	58	6054	3.44828	0.74331	over	B7Z4U6, B4DU58	J3QR41, B1AK87, A0A087X020, Q9BR76, B4DM33, A0A087WYV5, Q12929, B5BU83, F8WA11, P60983, B3KN06, H3BTU7, G5EA42, Q12792, Q96PK6, P58546, F8VQE1, Q13136, E7EV99, P07737, C9J712, Q9Y6W5, Q9Y6U3, Q02790, Q9Y6D6, Q14678, P52907, E9PFQ4, H0YMA2, Q5HYL6, E7ERI8, E3W994, C9JZB0, F5GWN4, A8K0K2, P47755, Q6IBS0, A0A0U1RQQ1, Q5SZK4, Q9BTW9, C9JJV6, F8W7U3, C9J0J7,B7Z4U6, B4DU58	0.0598017	0.980929
GO:0030336	negative regulation of cell migration	P	2	45	58	6054	3.44828	0.74331	over	H0YGX7, P08727	Q49AE1, Q5VTR2, P57105, Q9BR76, B4DYI8, Q5H9A7, A0A024R2W4, A0A087WYV5, B1AHA8, A0A087WY66, B3KN06, A4D0Y1, Q5JRA6, P67870, F1DAL8, Q5U071, B4DJ12, A0A087WW56, Q59GF2, B4DUQ8, A8KAE3, Q15262, H0Y630, C9J712, Q8N4P8, J3KRE2, Q5T3J6, A0A087WUK4, Q9Y696, Q14678, B4DGC3, P24468, H0Y465, A0A0S2Z4Z2, E9PES6, B4E3Q9, Q9Y4C2, Q9Y3F4, P09429, Q9BUL8, Q9NRW8, C9J0J7, Q53TD0,H0YGX7, P08727	0.0598017	0.980929
GO:0043933	macromolecular complex subunit organization	P	4	944	58	6054	6.89655	15.593	under	Q96DZ4, B7Z4U6, P08727, B4DU58	P14174, J3QR58, Q15836, J3QR41, P55072, Q09161, F8VV52, A0A024RB49, Q01664, P08708, Q86VS8, C9JII4, J3QR09, Q9H2W6, A0A024R588, O75940, P43034, P15880, B7Z6Y2, P62195, P62191, Q53G19, B2R9K8, Q96GM5, Q92796, B2R9I9, P13645, Q9NQW6, Q8WVC2, Q92769, H7C189, P42566, B1AJY7, Q92747, A0A024R4H4, B8ZZV5, B1AK87, X5CF57, Q14011, B8ZZU8, H7C155, B4DMX1, X6RKS3, B2R9B4, Q8IUE6, P34932, Q14008, A0A087X020,…	0.0261786	0.980929
GO:0030139	endocytic vesicle	C	3	100	58	6054	5.17241	1.6518	over	B8ZZZ1, D6RA82, B4DPP0	Q53G71, B4DMM4, P51809, A5YM53, O94973, E9PM35, Q9BR76, S6AP35, B4DM44, F6IR49, Q9H0U4, B2R7M1, Q12965, Q92598, H0YEY8, P11234, P11233, A0A024R2H0, B3KNH5, E9PKJ0, B3KN06, P07900, Q05BS6, Q3SYF1, Q6LEU0, P27487, H0YDB7, P27449, Q10567, B2R5I8, A4D0Y1, D6R938, B4DJ53, P53680, P20339, U5YKD2, O15400, B7ZKQ9, J3QLN2, P62979, P50995, Q00610, Q15286, Q7Z677, P61106, P62820, Q59FG2, Q9ULC3, O43747, H0Y…	0.0552757	0.980929
GO:0004859	phospholipase inhibitor activity	F	1	5	58	6054	1.72414	0.08259	over	D6RA82	P08758, P04083, P07355, P09525,D6RA82	0.0461228	0.980929
GO:0043542	endothelial cell migration	P	2	47	58	6054	3.44828	0.776346	over	P25815, D6RA82	E9PMY3, P57105, Q53EU2, Q8WUI4, B4DYU4, Q9BR76, P08581, A0A087WZ85, A0A087WYV5, B3KN06, P27487, O43930, P67870, F1DAL8, Q5U071, B7ZKQ9, H0YBP1, A8KAE3, B3KWS6, O75340, Q59FI5, Q5T3J6, A0A087WUK4, Q15139, Q59F20, B3KVH4, P24468, B4DG79, H0Y465, J3KPM9, Q8N2P0, O75116, E9PES6, P04792, Q96L35, P52799, Q5T123, P09429, Q9BUL8, Q9H553, P19174, B4E0K5, P35579, Q53TD0, Q45KI0,P25815, D6RA82	0.0640871	0.980929
GO:0033631	cell-cell adhesion mediated by integrin	P	1	8	58	6054	1.72414	0.132144	over	P16422	F8WC54, Q92508, P27487, P05556, Q96N83, A2VCL5, H7C598,P16422	0.0717295	0.980929
GO:0060393	regulation of pathway-restricted SMAD protein phosphorylation	P	1	8	58	6054	1.72414	0.132144	over	D3DSV0	O94907, B4DYI8, P67870, P33981, K7EN45, Q9Y3F4, K7EL18,D3DSV0	0.0717295	0.980929
GO:0005835	fatty acid synthase complex	C	1	8	58	6054	1.72414	0.132144	over	Q99536	Q8IUB6, H7BZH6, Q08257, Q9NWU1, A6NMA8, A0A0U1RQF0, Q8IVS2,Q99536	0.0717295	0.980929
GO:0050864	regulation of B cell activation	P	1	8	58	6054	1.72414	0.132144	over	E9PJK1	P14174, A0A024R2C4, Q13315, B2RA26, K7ENH8, P35869, B7Z8Y1,E9PJK1	0.0717295	0.980929
GO:0051127	positive regulation of actin nucleation	P	1	8	58	6054	1.72414	0.132144	over	B7Z4U6	Q8WUW1, A4D0Y1, E7EUA1, Q7L576, Q9Y6U3, Q9Y2A7, Q5SZK4,B7Z4U6	0.0717295	0.980929
GO:0005254	chloride channel activity	F	1	8	58	6054	1.72414	0.132144	over	O15247	Q49AE1, B1AH94, B3KX12, Q9Y696, Q9NW15, B4E3N4, O00299,O15247	0.0717295	0.980929
GO:0036230	granulocyte activation	P	1	8	58	6054	1.72414	0.132144	over	D6RA82	Q15836, P51809, B4DY46, Q12846, B4DFV1, O00186, J3QRU4,D6RA82	0.0717295	0.980929
GO:0030888	regulation of B cell proliferation	P	1	8	58	6054	1.72414	0.132144	over	E9PJK1	P14174, A0A024R2C4, Q13315, B2RA26, K7ENH8, P35869, B7Z8Y1,E9PJK1	0.0717295	0.980929
GO:0016409	palmitoyltransferase activity	F	1	8	58	6054	1.72414	0.132144	over	Q8NFR3	Q9UES0, Q9C0B5, A8K5N3, B2RAQ8, Q9NYG2, O15270, O15269,Q8NFR3	0.0717295	0.980929
GO:0016408	C-acyltransferase activity	F	1	8	58	6054	1.72414	0.132144	over	Q8NFR3	P55084, O75600, P24752, A8K4W5, O15270, O15269, P40939,Q8NFR3	0.0717295	0.980929
GO:0043171	peptide catabolic process	P	1	8	58	6054	1.72414	0.132144	over	P15144	Q9NQW7, A0A0A7E7X3, P09960, P14735, Q9UKU6, B4DSE2, B4E2P4,P15144	0.0717295	0.980929
GO:0035455	response to interferon-alpha	P	1	8	58	6054	1.72414	0.132144	over	Q05DN2	Q53EU2, H0YCK3, O14879, Q59EC0, F8VXY3, Q8IW76, A0A024DAK3,Q05DN2	0.0717295	0.980929
GO:0015807	L-amino acid transport	P	1	8	58	6054	1.72414	0.132144	over	Q9HBR0	Q15758, E9PMA3, B7Z589, B2R7K1, E5RHG5, Q8NCD8, Q9NRX5,Q9HBR0	0.0717295	0.980929
GO:0016229	steroid dehydrogenase activity	F	1	8	58	6054	1.72414	0.132144	over	P37059	Q15738, Q99714, B4DWS6, B2R659, D6RCD0, P14550, P56937,P37059	0.0717295	0.980929
GO:0008210	estrogen metabolic process	P	1	8	58	6054	1.72414	0.132144	over	P37059	Q15738, B2R659, B7Z1M0, C9J719, E9PGI0, B3KT14, P56937,P37059	0.0717295	0.980929
GO:0007606	sensory perception of chemical stimulus	P	1	8	58	6054	1.72414	0.132144	over	Q7Z443	P08754, Q13606, Q8NGK3, Q8NGA1, P04899, P63096, A0A0S2Z3S5,Q7Z443	0.0717295	0.980929
GO:0031329	regulation of cellular catabolic process	P	0	324	58	6054	0	5.35183	under		A0A024RAV5, P55072, A0A024R595, O75962, E9PAK5, B2R9S6, P25685, K7EIX0, P62195, P62191, Q9H2M9, A8K9U6, Q9H2J4, B7Z722, Q9NR50, E9PN68, B1AJY7, F2Z2E2, R4GNH3, Q96T88, Q15751, P26038, B4DZJ7, Q8NFQ8, B4DZF6, O95433, B4DZF1, P10909, Q13501, A2RRP1, B7Z5Y3, R4GMU8, D6RHW1, Q53EN2, Q9NQ88, B4DYX7, A0A087WZP7, Q86UE8, Q86UE4, Q6UWE0, B8ZZ67, E9PM35, Q8WTW4, Q9UPU5, Q4TT55, B2RE34, A8K8B9, Q5H9A7, Q9H…	0.0405283	0.980929
GO:0022613	ribonucleoprotein complex biogenesis	P	0	330	58	6054	0	5.45094	under		Q09161, F8VV52, A0A024RB49, P08708, C9JII4, J3QR09, A0A024R588, O75940, B3KPV5, P15880, D6RIY6, B3KQ21, Q53G19, Q5SY16, Q8WVC2, Q9NQT5, Q9NQT4, H7C189, Q14011, A0A087X020, A8K9K8, B4DZM3, P82933, P82932, P82930, P23396, P82914, P82912, B3KP47, Q969X6, R4GMU7, P62081, B4DYZ1, P52298, E5RJI7, Q6P2Q9, Q969Q0, Q92665, O94906, P09001, B2RDZ9, Q9UPY3, B4DLS8, E5RIZ4, Q9BQQ5, Q969E8, A0A087WZC1, B4DLN1,…	0.0381274	0.980929
GO:0072521	purine-containing compound metabolic process	P	0	330	58	6054	0	5.45094	under		P08754, P06576, Q32Q12, A0A024RAV5, P55072, A0A024R595, O75962, E9PAK5, B2R9S6, O75947, P25685, Q9H2M9, Q92796, D6RIT0, B7Z722, Q9NR50, E9PN68, Q53FI8, A2IDA3, F2Z2E2, P34931, P30566, E9PN17, B7Z6H4, B4DN40, P30520, Q99766, Q96T88, Q15751, P26038, Q8NFQ8, P51841, O95433, Q13503, Q96G61, P0DMV8, Q658U3, B7Z5Y3, R4GMU8, B4DYX7, A0A087WZP7, E9PM35, A8K8N7, Q8WTW4, Q4TT55, B2RE34, O95340, B2R860, B2R…	0.0381274	0.980929
GO:0044801	single-organism membrane fusion	P	2	48	58	6054	3.44828	0.792864	over	Q99536, B4DPP0	Q15836, Q9UES0, B3KPR6, P51809, Q8WUH2, C9JU58, B7Z5J7, Q12981, B4DKR0, P04083, Q96E52, Q12846, B4DK63, Q9GZY8, O95140, Q07812, Q6LEU0, B7Z2V7, O15400, B4DIH2, O60763, A8K4G7, B4DHJ7, O43752, Q96AJ9, Q7L4E1, H0YNE9, P61026, P61006, I3L4J1, C9JBG0, Q9NX63, Q9NX57, Q15075, P51153, P51151, Q9P2R3, P51149, A0A024R9L9, P07355, Q9Y3D6, Q86YS7, A0A0C4DFN1, J3QRU4, E5KLJ7, B7Z879,Q99536, B4DPP0	0.06625	0.980929
GO:0008544	epidermis development	P	2	48	58	6054	3.44828	0.792864	over	O15247, P08727	Q32Q12, P13645, Q92769, Q49AE1, F8WC54, B4DYT5, Q4KR72, H0Y9V7, Q15648, Q01469, B5BU61, B4DL06, P04083, P60953, P15531, B2R5M9, D9ZGF8, A8K644, B2RB95, A8K588, O75367, P29373, Q9Y696, H0YAF9, P29317, P15153, P35908, O75116, Q309B1, P63000, C9JMC5, A0A024R8L8, A0A0S2Z3S5, O60361, Q9NUF9, P16615, Q9P0M6, O00299, A8MX75, Q2TB79, Q14254, B3KRG2, B1ALI9, P35527, J3QRD1, A6PW57,O15247, P08727	0.06625	0.980929
GO:0007049	cell cycle	P	3	801	58	6054	5.17241	13.2309	under	Q9H8M2, A0A0D9SG53, C9J2P0	E9PNK6, H7C1M2, P14174, B4E014, J3QR58, A0A024RAV5, J3QR41, Q5JW54, Q13627, Q96GX5, P04350, F8W733, Q01664, Q13619, Q13617, A0A024R595, Q9BSJ2, P55036, A0A024RAQ3, K4DI93, Q8WVM7, A0A024RB10, F2Z2U4, B2R9R2, Q53G71, F8W6N3, P43034, P78527, B7Z6Y2, P62195, P62191, B2R9L6, Q53G08, Q92796, Q3ZCM7, Q9NQW6, A8K9U1, P62140, Q92769, P62136, P11441, B1AJY7, Q9BRX5, B2R9C5, A0A0A0N0L3, X5CF57, F2Z2E2, Q29…	0.0287286	0.980929
GO:0090316	positive regulation of intracellular protein transport	P	2	49	58	6054	3.44828	0.809382	over	Q8IVQ8, D3DSV0	Q5TG38, A6NFQ2, Q53F35, B7Z629, A0A024R3H2, P61586, B9EIS5, Q99653, A0A024R1X8, P60953, B3KN05, Q9GZY8, B7Z3E5, Q13263, Q12797, O95071, Q5JR08, O15379, B4DTZ6, P63244, Q5F2F8, Q59F45, F6U1T9, Q14678, H0YN26, A8K2T7, B3KVB3, Q7Z434, Q9NW64, O15078, Q9Y4C2, Q9Y3D6, P12270, Q86YS7, F2ZC06, Q86YQ0, B4DDK3, P50402, P49841, Q8IWX8, K7EL18, Q14247, O95613, P84095, A0A024R5P7, P21333, Q68D16,Q8IVQ8, D3DS…	0.0684252	0.980929
GO:2000146	negative regulation of cell motility	P	2	49	58	6054	3.44828	0.809382	over	H0YGX7, P08727	Q49AE1, Q5VTR2, P57105, Q53EU2, Q9BR76, B4DYI8, Q5H9A7, A0A024R2W4, A0A087WYV5, B1AHA8, A0A087WY66, B3KN06, A4D0Y1, Q5JRA6, P67870, F1DAL8, Q5U071, B4DJ12, A0A087WW56, Q59GF2, B4DUQ8, A8KAE3, Q15262, H0Y630, C9J712, Q8N4P8, A0A024QZN4, J3KRE2, Q5T3J6, A0A087WUK4, Q9Y696, Q14678, B4DGC3, P24468, H0Y465, A0A0S2Z4Z2, E9PES6, B4E3Q9, Q9Y4C2, K7EN45, Q9Y3F4, K7EM91, P09429, Q9BUL8, Q9NRW8, C9J0J7, Q53…	0.0684252	0.980929
GO:0031333	negative regulation of protein complex assembly	P	2	49	58	6054	3.44828	0.809382	over	B7Z4U6, B4DU58	B1AK87, H7C155, P10909, O94907, B2R8E4, A0A024R3H2, Q5TEC6, B4DM33, B7Z4Z4, A0A087WYV5, Q12929, B5BU83, B2RCZ4, P12931, P60953, G5EA42, Q12792, P58546, E7EV99, P07737, B2RA70, C9J712, Q9Y6U3, Q9Y6D6, Q14678, P52907, B4DFV1, Q15058, H0YMA2, Q5HYL6, A0A0D9SFB3, B4DS19, I3L2Q8, Q71DI3, P47755, Q6IBS0, P49841, A0A0U1RQQ1, Q9BTW9, C9JJV6, F8W7U3, Q8NHG7, E9PBE1, C9J0J7, K7EK07, Q68D16, C9JIR6,B7Z4U6, …	0.0684252	0.980929
GO:0022803	passive transmembrane transporter activity	F	2	49	58	6054	3.44828	0.809382	over	Q7Z443, O15247	Q5TG80, P62166, Q49AE1, A5YM53, A8K8R2, Q93034, B4DY51, Q92508, Q8NE86, A0A024R2C4, P54289, B7Z3R2, B1AH94, O15554, Q07820, Q07812, B4DIX5, P62942, H0Y5Z6, P08133, B3KX12, Q9NY12, P45880, D6RCD9, B4DGM6, Q9Y696, Q14643, Q9NWR8, Q9BXT2, B4DFZ1, P21796, Q9Y584, E7ES96, Q14573, Q14571, Q9NW15, H7C5K2, B4E3N4, A8K1C7, B3KU09, A8K0K0, B6ETL5, A0A0S2Z377, O00299, A0A0U1RRH1, Q9Y277, Q9Y217,Q7Z443, O152…	0.0684252	0.980929
GO:0015267	channel activity	F	2	49	58	6054	3.44828	0.809382	over	Q7Z443, O15247	Q5TG80, P62166, Q49AE1, A5YM53, A8K8R2, Q93034, B4DY51, Q92508, Q8NE86, A0A024R2C4, P54289, B7Z3R2, B1AH94, O15554, Q07820, Q07812, B4DIX5, P62942, H0Y5Z6, P08133, B3KX12, Q9NY12, P45880, D6RCD9, B4DGM6, Q9Y696, Q14643, Q9NWR8, Q9BXT2, B4DFZ1, P21796, Q9Y584, E7ES96, Q14573, Q14571, Q9NW15, H7C5K2, B4E3N4, A8K1C7, B3KU09, A8K0K0, B6ETL5, A0A0S2Z377, O00299, A0A0U1RRH1, Q9Y277, Q9Y217,Q7Z443, O152…	0.0684252	0.980929
GO:0043268	positive regulation of potassium ion transport	P	1	5	58	6054	1.72414	0.08259	over	A0A0D9SG53	P33176, E7EQD7, A0A0S2Z3C0, O60282,A0A0D9SG53	0.0461228	0.980929
GO:0030029	actin filament-based process	P	5	244	58	6054	8.62069	4.03039	over	H0YGX7, B7Z4U6, P08727, B3KUB6, B4DU58	A0A024RAV5, B4DNA3, Q9NQX4, Q92796, B7Z722, Q92747, B1AK87, Q9H2D6, Q96GD0, B3KPC7, Q8WUW1, P08670, P26038, Q53S54, H7C0A3, R4GMT0, B4DYX7, Q96FJ2, Q96SB3, E9PM35, Q9BR76, H0Y9V7, P61586, B2RE34, A0A087WZB5, B7ZB56, Q9UPJ8, P35241, Q8N8M9, P78310, A0A087WYV5, Q12965, Q12955, Q12929, P11234, P11233, B3KNJ3, P42345, P12931, F8WA11, C9J9T0, B4DXH2, P04075, F6RFD5, P60983, P60953, Q6R327, A8K6X5, B3K…	0.05478	0.980929
GO:0051924	regulation of calcium ion transport	P	2	50	58	6054	3.44828	0.8259	over	A4UJ43, O15247	Q86VR1, Q49AE1, Q13586, B2R983, B4DZF1, Q5SWX3, B2RDW0, Q86TY5, A8K8B9, Q6NVH9, Q9UPJ8, Q12955, A0A024R2C4, B4DL06, A0A024R258, B7Z3V1, P54289, Q6ZT73, P22694, O76024, Q07812, Q12797, D6R938, B7ZKY2, A0A0G2JH68, F8W1R7, P62942, P26885, D3DVR8, B2RA10, H0Y551, B3KW93, M0R116, Q15118, Q9Y696, Q09666, P14649, H7C5K2, C9JZB0, P41208, A0A0S2Z3C0, Q86YM6, A0A0U1RRH1, P05023, C9JKI3, P19174, P19105, C9J…	0.0706115	0.980929
GO:0048863	stem cell differentiation	P	2	50	58	6054	3.44828	0.8259	over	P16422, P26447	F8VV52, B4DNM0, A8K9U1, Q86UJ2, Q9BR76, A0A024R2W4, E9PKY2, A5YKK6, U3KPY1, F8WA11, B4DL06, B3KN06, Q75MP9, O15514, C9JQS8, B4DVP5, P67775, A8KAE3, B4DHJ3, P62875, Q5T3J6, Q59F45, F5GYJ5, E9PFQ4, O75175, I3L3A7, Q04721, D3DSX2, E7ERI8, E3W994, B4DRN5, P19387, A0A0C4DGZ0, C9JLU1, Q9Y3F4, F5H876, Q6PD62, P62487, I7GPQ7, O00231, P49841, Q96J99, K7EKS1, B3KRM2, K7EL18, Q9H4H8, P48059, Q68D16,P16422, …	0.0706115	0.980929
GO:0044260	cellular macromolecule metabolic process	P	23	3145	58	6054	39.6552	51.9491	under	P55795, A0A024RC76, Q8NFR3, A4UJ43, B4E200, P16422, A0A087WXU6, Q96B43, P43355, Q99536, E9PJK1, B4DLV6, P15144, H0Y6D8, A0A087X0Q6, Q96DZ4, Q2TU64, Q06787, Q9H8M2, D6RA82, A0A0D9SG53, D3DSV0, C9J2P0	P61758, E9PNK6, H7C1M2, Q15847, P08758, P14174, B4E014, J3QR58, B1AKN7, Q32Q12, P55084, Q53SV6, A0A024RAV5, A0A024RAV4, P98179, P98175, P39880, J3QR41, P55072, Q9NRG0, D3DP46, Q9NRF9, Q09161, F8VV56, F8VV52, Q8WVQ1, Q15814, Q15813, B4DNM0, Q86VU2, Q9H2Y7, A0A024RB49, B3KPZ7, Q53T40, Q8WW12, Q13627, Q86W56, Q96GX5, P04350, F8W733, Q01664, Q8WW01, P08708, Q13619, Q13617, C9JII4, J3QR09, Q86W42, Q96…	0.0180736	0.980929
GO:0007422	peripheral nervous system development	P	1	9	58	6054	1.72414	0.148662	over	A4UJ43	B7Z1R4, A0A024QZP7, H0YAN8, H0Y465, B3KU62, C9JMC5, C9JWM1, J3QRD1,A4UJ43	0.0799349	0.980929
GO:0060389	pathway-restricted SMAD protein phosphorylation	P	1	9	58	6054	1.72414	0.148662	over	D3DSV0	O94907, B4DYI8, P67870, P33981, Q9Y4E8, K7EN45, Q9Y3F4, K7EL18,D3DSV0	0.0799349	0.980929
GO:0018899	1,2-dichloroethane metabolic process	P	1	9	58	6054	1.72414	0.148662	over	B4DH89	P49419, C9J8Q5, B2R5T2, P30038, H0YMG7, B4DDF8, P30837, Q02252,B4DH89	0.0799349	0.980929
GO:2001269	positive regulation of cysteine-type endopeptidase activity involved in apoptotic signaling pathway	P	1	9	58	6054	1.72414	0.148662	over	B7Z4U6	Q8IUB6, Q13546, H7C0E2, Q15628, B7Z3M7, Q6LCB0, F8U8C0, A0A0C4DG44,B7Z4U6	0.0799349	0.980929
GO:0019260	1,2-dichloroethane catabolic process	P	1	9	58	6054	1.72414	0.148662	over	B4DH89	P49419, C9J8Q5, B2R5T2, P30038, H0YMG7, B4DDF8, P30837, Q02252,B4DH89	0.0799349	0.980929
GO:0007272	ensheathment of neurons	P	1	9	58	6054	1.72414	0.148662	over	B4DPP0	P10909, A0A087WZP7, Q9UPY3, Q13144, H0YAN8, B3KU62, Q9UI10, P49770,B4DPP0	0.0799349	0.980929
GO:0019228	regulation of action potential in neuron	P	1	9	58	6054	1.72414	0.148662	over	B4DPP0	P10909, A0A087WZP7, Q9UPY3, Q13144, H0YAN8, B3KU62, Q9UI10, P49770,B4DPP0	0.0799349	0.980929
GO:0006693	prostaglandin metabolic process	P	1	9	58	6054	1.72414	0.148662	over	G3V2R9	P14174, P16152, J3QKK8, Q15185, A0A024R8L7, A0A0C4DG51, Q9BTZ2, B4E0M5,G3V2R9	0.0799349	0.980929
GO:0006692	prostanoid metabolic process	P	1	9	58	6054	1.72414	0.148662	over	G3V2R9	P14174, P16152, J3QKK8, Q15185, A0A024R8L7, A0A0C4DG51, Q9BTZ2, B4E0M5,G3V2R9	0.0799349	0.980929
GO:0002275	myeloid cell activation involved in immune response	P	1	9	58	6054	1.72414	0.148662	over	D6RA82	Q15836, P51809, B4DY46, Q12846, H3BNE1, B4DQ79, O00186, J3QRU4,D6RA82	0.0799349	0.980929
GO:0007040	lysosome organization	P	1	9	58	6054	1.72414	0.148662	over	Q9UJC3	Q86VS8, Q3T906, P50897, Q9P253, F5GX19, A0A024R8Q1, Q9HC07, K7EK29,Q9UJC3	0.0799349	0.980929
GO:0045214	sarcomere organization	P	1	9	58	6054	1.72414	0.148662	over	P08727	B7Z722, P67936, P12814, B7Z2N5, O43707, K7ENT6, A0A0S2Z4G4, K7ELP0,P08727	0.0799349	0.980929
GO:0045109	intermediate filament organization	P	1	9	58	6054	1.72414	0.148662	over	P08727	P13645, P08670, A0A087WYY6, B7Z499, B8QGS9, C9J2C4, P35527, B3KQI5,P08727	0.0799349	0.980929
GO:0005832	chaperonin-containing T-complex	C	1	9	58	6054	1.72414	0.148662	over	Q2TU64	B2R9K8, P17987, P78371, P50991, P50990, B3KX11, B4DDU6, Q53HV2,Q2TU64	0.0799349	0.980929
GO:0032527	protein exit from endoplasmic reticulum	P	1	9	58	6054	1.72414	0.148662	over	B2R8A2	Q5T8U5, A0A024R3H2, B2R774, Q7Z7H5, A6NKT7, Q9HD47, B4DDK3, Q8IWJ2,B2R8A2	0.0799349	0.980929
GO:0090218	positive regulation of lipid kinase activity	P	1	9	58	6054	1.72414	0.148662	over	E9PJK1	A0JP11, Q05639, H0YBP1, D3DSX2, Q6ZNE5, Q16577, Q53HR1, Q14222,E9PJK1	0.0799349	0.980929
GO:0048565	digestive tract development	P	1	9	58	6054	1.72414	0.148662	over	Q59H46	Q53EU2, P23229, B4DVP5, D3DSX2, B4DRK1, Q9HCK8, B1AMG5, Q6KC79,Q59H46	0.0799349	0.980929
GO:0043500	muscle adaptation	P	1	9	58	6054	1.72414	0.148662	over	B7Z4U6	Q5SWX3, B1AHA8, P58546, D6R938, B4DTZ6, C9JKI3, A0A024RBC7, Q68D16,B7Z4U6	0.0799349	0.980929
GO:0005092	GDP-dissociation inhibitor activity	F	1	9	58	6054	1.72414	0.148662	over	H0YGX7	A8K594, J3KRE2, B4DRL9, P43487, P26374, A0A0A0MRC4, P50395, P31150,H0YGX7	0.0799349	0.980929
GO:0055123	digestive system development	P	1	9	58	6054	1.72414	0.148662	over	Q59H46	Q53EU2, P23229, B4DVP5, D3DSX2, B4DRK1, Q9HCK8, B1AMG5, Q6KC79,Q59H46	0.0799349	0.980929
GO:0004312	fatty acid synthase activity	F	1	9	58	6054	1.72414	0.148662	over	Q99536	Q8IUB6, H7BZH6, Q08257, Q9NWU1, A6NMA8, Q502X7, A0A0U1RQF0, Q8IVS2,Q99536	0.0799349	0.980929
GO:0043034	costamere	C	1	9	58	6054	1.72414	0.148662	over	P08727	Q12955, Q6ZT73, A0A024QZN4, A0A0J9YWY6, Q15149, Q15124, B4E3Q9, Q14315,P08727	0.0799349	0.980929
GO:0042552	myelination	P	1	9	58	6054	1.72414	0.148662	over	B4DPP0	P10909, A0A087WZP7, Q9UPY3, Q13144, H0YAN8, B3KU62, Q9UI10, P49770,B4DPP0	0.0799349	0.980929
GO:0030515	snoRNA binding	F	1	9	58	6054	1.72414	0.148662	over	A0A024RC76	B3KQ21, K7EIN2, Q9NR30, B4DIZ6, O43818, P55769, O00567, Q9Y2X3,A0A024RC76	0.0799349	0.980929
GO:0008593	regulation of Notch signaling pathway	P	1	9	58	6054	1.72414	0.148662	over	P43355	P57105, Q53EU2, P15529, Q8NBL1, Q9BUL8, Q9BUD9, P84090, H7C285,P43355	0.0799349	0.980929
GO:0010881	regulation of cardiac muscle contraction by regulation of the release of sequestered calcium ion	P	1	9	58	6054	1.72414	0.148662	over	O15247	B2R983, B2RDW0, A8K8B9, P22694, Q12797, D6R938, B3KW93, M0R116,O15247	0.0799349	0.980929
GO:0008366	axon ensheathment	P	1	9	58	6054	1.72414	0.148662	over	B4DPP0	P10909, A0A087WZP7, Q9UPY3, Q13144, H0YAN8, B3KU62, Q9UI10, P49770,B4DPP0	0.0799349	0.980929
GO:0042206	halogenated hydrocarbon catabolic process	P	1	9	58	6054	1.72414	0.148662	over	B4DH89	P49419, C9J8Q5, B2R5T2, P30038, H0YMG7, B4DDF8, P30837, Q02252,B4DH89	0.0799349	0.980929
GO:0042205	chlorinated hydrocarbon catabolic process	P	1	9	58	6054	1.72414	0.148662	over	B4DH89	P49419, C9J8Q5, B2R5T2, P30038, H0YMG7, B4DDF8, P30837, Q02252,B4DH89	0.0799349	0.980929
GO:0046596	regulation of viral entry into host cell	P	1	9	58	6054	1.72414	0.148662	over	B7Z4U6	H7C134, Q12899, Q3SYF1, O60493, P07237, P09382, Q14258, K7EKE8,B7Z4U6	0.0799349	0.980929
GO:0008266	poly(U) RNA binding	F	1	9	58	6054	1.72414	0.148662	over	P55795	P31943, G3V4C1, B7Z1D3, A0A087WTT1, Q8IYB7, B1ANR0, Q8TCS8, B4DDX2,P55795	0.0799349	0.980929
GO:0034308	primary alcohol metabolic process	P	1	9	58	6054	1.72414	0.148662	over	B4DH89	Q99497, B2R5T2, H0YMG7, C9JMC5, P11766, B4DDF8, P30837, J3QRD1,B4DH89	0.0799349	0.980929
GO:0007565	female pregnancy	P	1	9	58	6054	1.72414	0.148662	over	H0YGX7	Q49AE1, Q5H9A7, A0A024R326, B2RAK1, J3KRE2, Q13895, B1AMG5, Q07021,H0YGX7	0.0799349	0.980929
GO:0051604	protein maturation	P	2	51	58	6054	3.44828	0.842418	over	Q96B43, P15144	D3DP46, Q53G71, F5H4Q5, Q99797, B4DMR3, Q9NQH7, O75844, F5H442, B7SBB1, A0A024R3H2, P35232, B7Z553, B7Z4S4, Q10713, Q92542, E9PL01, H3BUW8, Q96E52, E9PKA7, P15529, F5H1F6, P22695, O76024, B4DJQ8, Q3SYF1, P31930, Q9UNE7, Q5U000, Q6PUJ7, P62979, P62942, Q8N4Q1, P01023, H0YNG3, Q2T9J0, B3KW95, J3KPX7, E7ES96, O60493, H7C585, E9PQR7, A8K072, B1AMG5, H3BLV0, P25774, Q07021, E9PNW4, H7C285, Q45KI0,Q96B…	0.0728082	0.980929
GO:0042788	polysomal ribosome	C	1	5	58	6054	1.72414	0.08259	over	Q06787	Q92615, Q2L6I2, Q7Z417, P62424,Q06787	0.0461228	0.980929
GO:0016018	cyclosporin A binding	F	1	5	58	6054	1.72414	0.08259	over	B4E200	C9JQD4, C9JN15, C9JMM5, E5KN59,B4E200	0.0461228	0.980929
GO:0048699	generation of neurons	P	1	473	58	6054	1.72414	7.81302	under	H0YGX7	A0A024RAV5, P98172, P39880, Q86VU2, P04350, Q86VS8, O75962, P55036, F2Z2V0, Q86VR2, A0A024RB10, Q53G71, A0A024RAM4, P43034, B7Z6Y2, P62195, P62191, B2R9L6, B3KPP8, Q96GM5, Q92796, P62166, Q3ZCM7, A8K9U1, Q92769, F5H4I5, P46939, E9PMV1, B1AJY7, Q92747, A0A0A0N0M2, F2Z2E2, H7C155, X6RKS3, R4GNH3, B3KPA1, P08670, B4DMR3, Q15751, P26038, Q9UQS6, B2R8X4, Q96T58, E7EMF1, Q53S54, Q5SWX3, Q53EU2, A5YM53,…	0.0433267	0.980929
GO:0044265	cellular macromolecule catabolic process	P	1	494	58	6054	1.72414	8.15989	under	A0A024RC76	J3QR58, Q32Q12, J3QR41, P55072, Q09161, F8VV52, Q8WW12, P08708, Q13619, Q13617, J3QR09, B3KQ99, P55036, K4DI93, F8W6N3, K7EIY6, P15880, F5H523, D6RIY6, Q8IUQ5, P62195, P62191, Q8WVC2, A8K9U6, A8K9U1, Q9H2J4, Q9NQT5, Q9NQT4, H7C189, B1AJY7, B4DMY4, A2IDA3, B4DZQ0, R4GNH3, B8ZZS4, A0A024R4C8, B4DZM3, Q5VTR2, R4GND1, Q53RX8, Q96T88, Q9BRP8, O95453, Q13546, A8K9E2, Q53S54, B4DZF6, Q53EY9, P10909, P39…	0.0364609	0.980929
[truncated: 7,663 more rows]
